# Supplementary material for: Fructans Are Differentially Distributed in Root Tissues of Asparagus
Source: Cells. 2020 Aug 22;9(9):1943. doi: 10.3390/cells9091943 (PMC7565981; doi:10.3390/cells9091943)
Supplement: Supplementary file 1 [file cells-09-01943-s001.zip]

Archive with 4 entries (4 files):
- Supplementary Figures.pdf
- Supplementary Table S1.xlsx
- Supplementary Table S2.xlsx
- Supplementary Table S3.xlsx
