# Supplementary material for: Fructans Are Differentially Distributed in Root Tissues of Asparagus
Source: Cells. 2020 Aug 22;9(9):1943. doi: 10.3390/cells9091943 (PMC7565981; doi:10.3390/cells9091943)
Supplement: Supplementary file 1 [file cells-09-01943-s001.zip › Supplementary Table S1.xlsx]

## Sheet: Sheet1
Supplementary Table S1: Integrated peak areas of oligosaccharide profiles obtained by HPAEC-PAD analysis for the different root tissues. Shown are values obtained from the three biological replicates (1, 2, and 3) for outer tissues (O), middle tissues (M) and inner tissues (I) together with the mean and standard deviation (STDEV). Also, ratios were calculated for the mean values O/M, O/I, as well…
			Outer tissues			Middle tissues			Inner tissues
			O3	O2	O1	M3	M2	M1	I3	I2	I1	Mean O		Mean M		Mean I		Ratio O/M		Ratio O/I		Ratio M/I
Peak #	Compound name	Retention time [min]	nC*min	nC*min	nC*min	nC*min	nC*min	nC*min	nC*min	nC*min	nC*min	Mean	STDEV	Mean	STDEV	Mean	STDEV	Ratio O/M	TTEST	Ratio O/I	TTEST	Ratio M/I	TTEST
1	Glucose	3.242	12.3715	10.2112	7.9843	18.9584	15.4193	10.7057	12.1614	6.7279	1.0276	10.189	2.19368	15.0278	4.14026	6.63897	5.56743	0.67801	0.0505314	1.53473	0.209953	2.26358	0.0100026		Legend Ratio:
2	Fructose	3.559	4.222	4.8923	4.4581	4.6631	3.5243	4.2096	5.9437	1.2741	0.3537	4.52413	0.339994	4.13233	0.573318	2.52383	2.99723	1.09481	0.534773	1.79256	0.395987	1.63732	0.400149		Ratio between 0.8 and 1.2
3	Melibiose	4.075	22.7474	14.1598	7.9203	21.1046	10.1448	6.443	11.8715	3.2125	0.379	14.9425	7.44447	12.5641	7.62434	5.15433	5.98727	1.1893	0.101093	2.89902	0.0129228	2.43759	0.0158943		Ratio >1.2
4	Sucrose	5.492	121.711	115.192	100.956	137.923	109.374	106.672	113.999	54.9032	15.1596	112.62	10.6141	117.99	17.3151	61.3538	49.7342	0.954486	0.48746	1.83558	0.155489	1.9231	0.101282		Ratio <0.8
5	Raffinose	9.159	0.0869	0.2231	0.1747	0.2519	0.1723	0.1735	0.1804	0.009	0.0013	0.161567	0.0690433	0.199233	0.0456146	0.0635667	0.101254	0.810942	0.622116	2.54169	0.416586	3.13424	0.0519385
6	1-Kestose	9.842	93.0106	74.9537	57.8756	91.2106	65.6259	50.1441	62.1506	16.3555	3.3736	75.28	17.5698	68.9935	20.7393	27.2932	30.8773	1.09112	0.111035	2.75819	0.0309537	2.52786	0.0224883		TTEST: Probability associated with a Student's paired t-Test, with a two-tailed distribution.
7	Unknown	10.35	0.1326	0.2898	0.2407	0.0434	0.1052	0.1017	0.0133	0.018	0.0023	0.221033	0.0804241	0.0834333	0.034714	0.0112	0.00805792	2.64922	0.0378234	19.7351	0.0453646	7.4494	0.0774181		p>0.05
8	Maltose	10.584	3.4076	4.9817	4.7378	6.2133	5.8092	7.7478	3.4021	1.5218	0.389	4.3757	0.847222	6.5901	1.02275	1.77097	1.52193	0.663981	0.0861959	2.4708	0.188172	3.72119	0.0693149		p between 0.05 and 0.01
9	Unknown	10.934	0.3281	0.4404	0.2584	0.2269	0.323	0.2079	0.0437	0.0825	0.0021	0.3423	0.0918272	0.2526	0.0617039	0.0427667	0.0402081	1.35511	0.0469385	8.0039	0.0100716	5.90647	0.00624744		p<0.01
10	Unknown	11.592	0.3497	0.7336	0.4986	0.0199	0.0133	0.0076	0.016	0.0049	0.0039	0.5273	0.193552	0.0136	0.00615549	0.00826667	0.0067159	38.7721	0.0453592	63.7863	0.0455072	1.64516	0.0737353
11	Unknown	11.942	0.5572	0.6228	0.4733	0.726	0.5826	0.5381	0.3153	0.1221	0.0359	0.5511	0.0749364	0.615567	0.0981922	0.157767	0.143074	0.895273	0.39717	3.49313	0.0370489	3.90175	0.00332104
12	6G-Kestose	12.509	65.6912	62.1294	53.7811	71.4277	59.0117	52.3848	54.4752	23.5234	5.219	60.5339	6.11325	60.9414	9.667	27.7392	24.8972	0.993313	0.894286	2.18225	0.0990036	2.19694	0.0635705
13	Nystose (Inulin-DP4)	13.35	62.2095	54.7303	46.9981	58.5461	47.7231	39.0888	33.4405	17.0246	5.4513	54.646	7.60605	48.4527	9.74915	18.6388	14.0642	1.12782	0.0408388	2.93184	0.0108707	2.59956	0.00697107
14	1&6G-KT (NS-DP4)	14.2	68.3583	64.4057	58.2481	69.1632	60.5977	58.676	49.2643	24.5831	5.9885	63.6707	5.09502	62.8123	5.58334	26.612	21.7091	1.01367	0.620289	2.39256	0.061878	2.3603	0.0620742
15	Unknown	15.4	0.3514	0.5893	0.4862	0.5336	0.619	0.6248	0.2403	0.1442	0.0362	0.475633	0.119301	0.592467	0.0510624	0.140233	0.102108	0.802802	0.123385	3.39173	0.0959943	4.22486	0.034305
16	1, 6G-KT (NS-DP4)	15.834	73.1738	70.3532	63.0446	75.6334	67.6943	60.4686	58.7249	29.5855	6.8506	68.8572	5.22768	67.9321	7.5852	31.7203	26.003	1.01362	0.639497	2.17076	0.0929215	2.14159	0.0765457
17	1,1,1-Kestopentaose (KP)	16.45	43.1768	47.994	39.7721	50.3713	47.0687	40.5485	30.2792	13.5122	2.9678	43.6476	4.13112	45.9962	4.99846	15.5864	13.7733	0.948941	0.442403	2.80037	0.0663356	2.95104	0.0289325
18	1,1&6G-KP and 1&1, 6G-KP (NS-DP5)	17.134	96.4912	93.3049	86.5358	95.7324	89.8611	83.0978	78.5814	44.1979	10.2671	92.1106	5.08401	89.5638	6.32255	44.3488	34.1574	1.02844	0.1043	2.07696	0.105296	2.01953	0.10657
19	Unknown	17.692	0.7741	2.0928	2.9005	1.6994	3.0328	5.61	1.2219	1.3476	0.4396	1.92247	1.07338	3.4474	1.98799	1.00303	0.491979	0.557657	0.123523	1.91665	0.389835	3.43697	0.224446
20	Unknown	18.042	1.4042	1.917	1.4014	2.1478	2.0376	2.1425	1.0477	0.4167	0.1311	1.5742	0.296877	2.1093	0.0621505	0.531833	0.469021	0.746314	0.12295	2.95995	0.0963408	3.96609	0.0268771
21	Unknown	18.325	0.7321	1.0752	0.7819	0.5341	0.5795	0.54	0.2009	0.1272	0.002	0.863067	0.185393	0.5512	0.0246854	0.110033	0.100555	1.5658	0.0782665	7.84368	0.0248871	5.00939	0.0176399
22	Unknown	18.659	0.0966	0.1637	0.1883	0.2491	0.3003	0.3583	0.0641	0.0714	0.0071	0.149533	0.0474631	0.302567	0.0546353	0.0475333	0.035206	0.494216	0.00394905	3.14586	0.142109	6.36536	0.0359766
23	1,1, 6G-KP (NS1-DP5)	19.025	44.5001	40.1848	39.4504	44.8166	41.1813	39.2834	40.0924	22.445	5.144	41.3784	2.72827	41.7604	2.81169	22.5605	17.4745	0.990853	0.375105	1.83411	0.16152	1.85104	0.152264
24	1,1,1,1-Kestohexaose (KH) (Inulin-DP6)	19.425	11.7999	18.6632	17.6675	19.4625	20.9968	20.5002	10.9297	5.9437	1.4931	16.0435	3.70866	20.3198	0.782891	6.12217	4.72083	0.78955	0.128225	2.62056	0.165608	3.31906	0.0432821
25	1,1,1&6G-KH (NS2-DP6) and 1&1,1, 6G-KH (NS3-DP6) and 1,1&1, 6G-KH (NS4-DP6)	20.042	77.8567	81.0007	75.8251	88.5309	85.4201	79.8271	70.1836	54.4997	15.0606	78.2275	2.60765	84.5927	4.4105	46.5813	28.4018	0.924755	0.0982774	1.67938	0.178644	1.81602	0.111226
26	Unknown	20.892	1.5411	3.4977	3.8611	2.2171	3.6539	6.0757	1.2758	1.3869	0.4621	2.96663	1.24785	3.98223	1.95014	1.0416	0.504927	0.744967	0.242021	2.84815	0.168488	3.82319	0.168683
27	Unknown	21.167	1.0281	1.6152	1.2525	1.6684	1.8114	1.8651	0.8135	0.4075	0.1277	1.2986	0.296252	1.78163	0.101672	0.449567	0.34483	0.728882	0.0781971	2.88856	0.116384	3.963	0.0353376
28	Unknown	21.709	0.1013	0.1306	0.1147	0.2981	0.2731	0.1457	0.1476	0.0633	0.0097	0.115533	0.0146678	0.238967	0.0817328	0.0735333	0.0695172	0.48347	0.127176	1.57117	0.453175	3.24977	0.0181165
29	1,1,1, 6G-KP (NS1-DP6) and Inulin-DP7	22.109	44.5277	51.5257	49.2281	52.8729	52.6276	50.4868	39.0144	25.6257	6.6791	48.4272	3.56709	51.9958	1.31255	23.7731	16.2471	0.931367	0.273783	2.03706	0.147935	2.18717	0.0827685
30	1,1,1,1&6G-KH (NS2-DP7) and 1&1,1,1, 6G-KH (NS3-DP7) and 1,1,1&1, 6G-KH (NS4-DP7)	22.917	75.2741	85.4402	81.8151	88.4265	90.0661	88.1127	74.6961	58.8807	17.4212	80.8431	5.15227	88.8684	1.04901	50.3327	29.5788	0.909695	0.0913998	1.60618	0.241361	1.76562	0.149464
31	Unknown	23.417	0.0881	0.0876	0.0778	0.0498	0.1038	0.1829	0.0477	0.0826	0.0321	0.0845	0.00580775	0.112167	0.0669433	0.0541333	0.0258574	0.753343	0.576034	1.56096	0.140602	2.07204	0.339997
32	Unknown	23.884	1.3019	3.3013	3.8279	2.9511	4.879	7.222	1.6667	1.6889	0.5764	2.81037	1.33264	5.01737	2.13881	1.31067	0.63599	0.560128	0.0653928	2.14423	0.287877	3.8281	0.141992
33	Unknown	24.234	6.9573	11.9137	8.9791	0.3802	0.1873	3.8543	0.2577	0.1568	0.0574	9.28337	2.49217	1.47393	2.06371	0.1573	0.100151	6.29836	0.0599235	59.017	0.0247652	9.37021	0.399717
34	NS1-DP7 and Inulin-DP8	24.95	19.8548	31.5124	32.3171	34.5419	36.2923	38.6529	23.3019	15.6898	4.9786	27.8948	6.97443	36.4957	2.06303	14.6568	9.20523	0.76433	0.107646	1.9032	0.278391	2.49002	0.078441
35	NS2-DP8 and NS3-DP8 and NS4-DP8	25.642	66.0388	74.3864	75.6925	76.6329	79.2288	81.676	65.9679	54.6961	16.8769	72.0392	5.2374	79.1792	2.52192	45.847	25.714	0.909825	0.0556251	1.5713	0.268569	1.72703	0.176459
36	Unknown	26.5	0.5043	2.0818	0.9694	1.4366	1.8594	1.0112	0.5154	0.3658	0.0737	1.18517	0.810582	1.43573	0.424101	0.3183	0.224648	0.825478	0.547626	3.72343	0.224347	4.51063	0.0271973
37	Unknown	26.842	0.0885	0.3053	0.9021	0.2992	0.7959	2.4688	0.2774	0.4161	0.2263	0.431967	0.421331	1.18797	1.1367	0.3066	0.0982115	0.363619	0.208891	1.40889	0.694338	3.87465	0.328844
38	NS1-DP8 and Inulin-DP9	27.65	4.2866	7.0954	9.1917	8.6497	8.22	10.2699	6.5965	4.5649	1.7402	6.8579	2.46116	9.04653	1.08103	4.30053	2.43892	0.758069	0.181762	1.59466	0.459914	2.10358	0.135093
39	NS2-DP9 and NS3-DP9 and NS4-DP9	28.042	39.6428	47.3236	48.7189	49.5153	45.0357	43.8059	42.0913	38.7096	13.747	45.2284	4.88735	46.119	3.0049	31.516	15.481	0.980691	0.863043	1.4351	0.342091	1.46335	0.199629
40	Unknown	28.925	0.7614	3.0519	2.944	1.9812	4.1774	5.0997	0.9923	1.1468	0.3655	2.25243	1.2924	3.75277	1.60203	0.834867	0.413759	0.600206	0.044826	2.69796	0.23612	4.49505	0.114501
41	Unknown	29.317	0.1003	0.2187	0.5627	0.2198	0.5212	1.4504	0.13	0.2434	0.1467	0.2939	0.240197	0.730467	0.641435	0.173367	0.0612227	0.402346	0.200181	1.69525	0.500299	4.21342	0.277745
42	NS1-DP9 and Inulin-DP10 and NS2-DP10 and NS3-DP10 and NS4-DP10	30.217	26.4048	67.4844	77.2182	60.2406	80.9291	91.1166	41.1336	40.6381	15.7658	57.0358	26.97	77.4288	15.7328	32.5125	14.5052	0.736623	0.0936569	1.75427	0.381354	2.38151	0.111465
43	Unknown	31.134	0.372	4.3925	4.8491	2.885	6.4814	8.1106	1.6274	2.0215	0.6788	3.20453	2.46365	5.82567	2.6738	1.44257	0.690169	0.550072	0.0166767	2.22141	0.384558	4.0384	0.133171
44	NS1-DP10 and Inulin-DP11 and NS2-DP11 and NS3-DP11 and NS4-DP11	32.325	12.419	43.9952	59.2716	34.9241	62.1778	77.1667	24.5787	27.1849	12.4354	38.5619	23.8942	58.0895	21.416	21.3997	7.87189	0.663836	0.00577983	1.80199	0.419707	2.71451	0.144793
45	Unknown	33.134	0.6472	3.1506	4.672	1.9751	5.4406	9.2252	1.1913	1.8187	0.7854	2.82327	2.03227	5.54697	3.62622	1.26513	0.520592	0.508975	0.104276	2.2316	0.348809	4.38449	0.195407
46	NS1-DP11 and Inulin-DP12 and NS2-DP12 and NS3-DP12 and NS4-DP12	34.267	4.5317	22.7773	39.5911	16.9526	39.4227	67.5348	13.0065	16.2315	9.6354	22.3	17.5346	41.3034	25.3435	12.9578	3.29832	0.539908	0.0546262	1.72097	0.491351	3.18753	0.214414
47	Unknown	35.017	0.2705	1.8559	3.2876	1.1716	3.5662	7.2075	0.8168	1.3053	0.6505	1.80467	1.5092	3.98177	3.03933	0.9242	0.340355	0.453233	0.137237	1.95268	0.445208	4.30834	0.237447
48	NS1-DP12 and Inulin-DP13 and NS2-DP13 and NS3-DP13 and NS4-DP13	36.084	1.4839	10.5464	23.0277	7.4387	21.2895	50.6113	6.4602	8.8518	6.6227	11.686	10.817	26.4465	22.0435	7.31157	1.33635	0.441873	0.153301	1.59829	0.560175	3.61708	0.275152
49	Unknown	36.784	0.0635	0.8661	1.96	0.5266	1.9463	4.8981	0.3932	0.7681	0.4806	0.9632	0.951971	2.457	2.23005	0.5473	0.196148	0.392023	0.182373	1.75991	0.525723	4.48931	0.276827
50	NS1-DP13 and Inulin-DP14 and NS2-DP14 and NS3-DP14 and NS4-DP14	37.767	0.4846	4.6266	12.2563	3.0829	10.5413	33.1485	3.0488	4.5354	4.3694	5.78917	5.97134	15.5909	15.656	3.98453	0.814608	0.371317	0.223663	1.45291	0.623125	3.91285	0.31621
51	Unknown	38.417	0.1242	0.3108	1.2526	0.2308	1.0493	3.2251	0.2054	0.4487	0.3362	0.562533	0.604854	1.50173	1.54757	0.3301	0.121765	0.374589	0.228634	1.70413	0.567236	4.54933	0.312274
52	NS1-DP14 and Inulin-DP15 and NS2-DP15 and NS3-DP15 and NS4-DP15	39.334	0.0849	1.7498	5.9944	1.1702	4.8379	19.7689	1.3057	2.1835	2.7652	2.6097	3.04715	8.59233	9.85138	2.0848	0.734739	0.303724	0.268105	1.25177	0.738703	4.12142	0.345075
53	Unknown	39.925	0.0328	0.1773	0.671	0.1339	0.5444	1.9771	0.1113	0.2374	0.2186	0.2937	0.334644	0.885133	0.967688	0.1891	0.0680293	0.331814	0.247031	1.55315	0.608763	4.68077	0.324704
54	NS1-DP15 and Inulin-DP16 and NS2-DP16 and NS3-DP16 and NS4-DP16	40.809	0.0292	0.7302	2.9012	0.4305	2.1652	11.0372	0.5382	1.0145	1.696	1.2202	1.49739	4.5443	5.68952	1.0829	0.581923	0.268512	0.303919	1.12679	0.822372	4.19642	0.363042
55	Unknown	41.417	0.0151	0.0825	0.2165	0.0412	0.2093	1.064	0.0384	0.1106	0.1376	0.1047	0.102519	0.438167	0.548466	0.0955333	0.0512876	0.23895	0.326303	1.09595	0.817368	4.58653	0.363001
56	NS1-DP16 and Inulin-DP17 and NS2-DP17 and NS3-DP17 and NS4-DP17	42.2	0.0415	0.3209	1.3479	0.1648	0.9671	5.9213	0.2191	0.4692	0.993	0.5701	0.687929	2.35107	3.11783	0.560433	0.394934	0.242486	0.332379	1.01725	0.96048	4.19509	0.373907
57	Unknown	42.809	0.0162	0.033	0.1401	0.0216	0.1007	0.5962	0.0102	0.0435	0.0841	0.0631	0.0672109	0.2395	0.311433	0.0459333	0.03701	0.263466	0.337422	1.37373	0.481008	5.21408	0.349514
										Total fructan peak area:		1015.46		1137.42		519.523
										Total peak area:		1199.44		1342.48		608.641
