# Supplementary material for: Fructans Are Differentially Distributed in Root Tissues of Asparagus
Source: Cells. 2020 Aug 22;9(9):1943. doi: 10.3390/cells9091943 (PMC7565981; doi:10.3390/cells9091943)
Supplement: Supplementary file 1 [file cells-09-01943-s001.zip › Supplementary Table S2.xlsx]

## Sheet: identified
Supplementary Table S2: Identification and functional classification of proteins that were significantly differentially abundant in the three analysed regions of asparagus roots. Provided are lists of all identified proteins (spreadsheet "identified"), statistically significant differentially abundant proteins (spreadsheet "differentially") and functional classifications (spreadsheet "KEGG").
Accession	Description	Sum PEP Score	Coverage [%]	# Peptides	# PSMs	# Unique Peptides	# AAs	MW [kDa]	calc. pI	Score Sequest HT: A2 Sequest HT	# Peptides (by Search Engine): A2 Sequest HT	Abundance Ratio: (middle) / (inner)	Abundance Ratio: (outer) / (inner)	Abundance Ratio: (outer) / (middle)	Abundance Ratio Adj. P-Value: (middle) / (inner)	Abundance Ratio Adj. P-Value: (outer) / (inner)	Abundance Ratio Adj. P-Value: (outer) / (middle)	Abundance Ratio Variability [%]: (middle) / (inner)	Abundance Ratio Variability [%]: (outer) / (inner)	Abundance Ratio Variability [%]: (outer) / (middle)	Abundances (Grouped): inner	Abundances (Grouped): middle	Abundances (Grouped): outer	Abundances (Grouped) CV [%]: inner	Abundances (Grouped) CV [%]: middle	Abundances (Grouped) CV [%]: outer
1150739823	basic blue protein [Asparagus officinalis]	20.531	20	1	11	1	128	13.2	10.01	44.46	1	0.024	0.066	1.486	0.000356242	0.177146	0.837897	68.6	27.96	4.98	274.2	6.5	19.2	26.77	81.77	45.58
1150695329	pollen-specific protein C13-like [Asparagus officinalis]	5.419	10	1	1	1	151	16.8	7.65	0	1	14.989	2.03	0.442	0.00316474	0.884778	0.107834	61.71	94.57	27.8	13	274.9	12.1	58.55	78.35	139.42
1150726579	succinate dehydrogenase subunit 3-2, mitochondrial-like isoform X1 [Asparagus officinalis]	10.106	11	1	10	1	134	14	9.86	23.37	1	0.045	0.074	1.769	0.00904529	0.278408	0.66302	23.78	8.92	0.62	275	9	15.9	25.33	35.26	20.64
1150703387	uncharacterized protein LOC109838349 [Asparagus officinalis]	23.113	21	1	13	1	139	15.4	6.79	33.5	1	0.048	0.047	1.349	0.0134044	0.136926		76.13	94.8	82.88	269.6	13	17.4	36.05	65.52	48.75
1150698704	NADH dehydrogenase [ubiquinone] 1 beta subcomplex subunit 7 [Asparagus officinalis]	1.488	11	1	3	1	104	12.4	8.15	6.82	1	0.072	0.06	0.386	0.0191043	0.10209	0.172047	56.37	31.29	48.27	265.7	17.7	16.6	6.04	90.93	47.5
1150724642	peroxiredoxin-2F, mitochondrial-like [Asparagus officinalis]	5.934	15	1	10	1	79	8.9	5.12	18.65	1	11.045	8.734	1.022	0.0219304	0.316877	0.995088	33.58	45.52	47.36	11.9	131.4	156.7	71.19	21.09	41.2
1150715927	26S proteasome non-ATPase regulatory subunit 9 [Asparagus officinalis]	10.002	13	1	8	1	213	23.2	5.72	21.1	1	0.036	0.081	2.244	0.0300435	0.393911		36.47	9.72	25.11	262.4	11.6	26	12.83	82.17	26.64
1150706865	UPF0587 protein C1orf123 homolog [Asparagus officinalis]	9.031	13	1	10	1	176	19.5	5.07	25.01	1	8.9	6.613	0.743	0.0336657	0.367669	0.899465	88.65	29.87	73.61	18.9	168.1	113	40.55	38.57	25.36
1150737218	LOW QUALITY PROTEIN: glycine-rich protein 2-like [Asparagus officinalis]	11.779	11	1	10	1	192	19.8	8.37	28.43	1	0.066	0.069	0.922	0.0372859	0.243065		17.48	19.87	33.25	265.5	17.5	17	16.33	6.35	26.33
1150697138	uncharacterized protein LOC109835968 [Asparagus officinalis]	16.271	12	1	6	1	146	16.3	6.67	17.73	1	0.086	0.023	0.234	0.101442	0.0229902	0.0285381	45.93	20.07	40.93	258.7	29.2	12.1	56.16	74.77	44.69
1150714314	acyl carrier protein 2, mitochondrial-like [Asparagus officinalis]	11.354	10	1	35	1	122	13.2	5.24	86.55	1	3.696	5.223	1.485	0.138096	0.0489294	0.511925	47.85	57.79	66.41	30.5	118.6	150.9	5.27	35.31	46.64
P42553	DNA-binding protein S1FA1 OS=Oryza sativa subsp. japonica OX=39947 GN=S1FA1 PE=3 SV=1	2.448	13	1	2	1	76	8.5	9.99	1.82	1	0.103	0.137	0.61	0.138096	0.604919	0.734069	22.38	77.16	80.45	253.3	22.6	24.1	22.12	110.99	105.53
1150705156	protein mago nashi homolog [Asparagus officinalis]	8.29	13	1	1	1	152	17.8	5.87	2.33	1	0.098	0.118	1.046	0.254351	0.608793		18.66	48.97	61.95	242	23.8	34.1	14	39.94	62.62
1150719392	uncharacterized protein LOC109845419 [Asparagus officinalis]	5.515	16	1	1	1	106	12	4.54	2.07	1	4.803	3.408	0.84	0.327072	0.474068	0.953876	37.39	11.39	6.12	38.2	141.6	120.2	67.52	19.65	71.43
1150683513	DNA-directed RNA polymerases II, IV and V subunit 11-like [Asparagus officinalis]	9.971	12	1	12	1	120	14.2	8.84	11.19	1	0.139	0.139	1.002	0.374651	0.712609	0.995088	38.94	11.63	80.38	234.5	32.7	32.8	14.93	20.46	38.84
1150696473	SUMO-conjugating enzyme SCE1 [Asparagus officinalis]	4.69	16	1	2	1	159	18	8.28	0	1	0.124	0.225	1.817	0.398336	0.818237		54.23	29.54	95.31	230.4	24.7	44.9	8.12	67.66	51.4
Q8LEQ0	60S acidic ribosomal protein P1-3 OS=Arabidopsis thaliana OX=3702 GN=RPP1C PE=1 SV=2	3.024	36	1	4	1	113	11.2	4.36	0	1	0.119	0.188	1.361	0.401084	0.804235		52.7	23.73	94.64	230.5	27.4	42.1	3.16	79.75	40.6
1150672984	zinc finger CCCH domain-containing protein 17-like [Asparagus officinalis]	1.476	11	1	2	1	116	12.7	7.21	0	1	0.249	0.155	0.801	0.512869	0.443524	0.918093	43.19	31.6	84	215.4	47	37.7	17.36	40.91	107.74
1150727599	cytochrome b-c1 complex subunit 8 [Asparagus officinalis]	6.055	21	1	6	1	57	6.3	9.91	13.65	1	0.204	0.105	1.003	0.525759	0.433383	0.995088	20.41	3.3	73.49	220.6	50.8	28.7	14.77	41.08	76.39
1150748289	adenine phosphoribosyltransferase 3-like [Asparagus officinalis]	4.078	15	1	3	1	153	16.6	5.05	2.65	1	3.922	2.204	0.562	0.543134	0.831895	0.639978	41.31	66.8	44.93	42.1	165.1	92.8	76.31	13.22	18.28
1150691358	uncharacterized protein LOC109833422 [Asparagus officinalis]	6.657	14	1	3	1	81	9.3	5.9	1.87	1	0.183	0.189	1.161	0.580404	0.80017	0.957579	65.74	15.99	74.64	222.2	40.6	37.2	40.21	59.26	17.86
1150677392	vacuolar protein sorting-associated protein 2 homolog 3 isoform X1 [Asparagus officinalis]	10.628	11	1	4	1	212	23.1	5.77	10.97	1	0.177	0.42	1.584	0.645368	0.953788		47.93	17.1	33.35	179.4	45.3	75.3	39.72	20.9	20.45
O49313	NADH dehydrogenase [ubiquinone] 1 alpha subcomplex subunit 13-B OS=Arabidopsis thaliana OX=3702 GN=At2g33220 PE=2 SV=1	15.01	13	1	10	1	143	16.1	9.36	26.75	1	0.206	0.098	0.572	0.654925	0.437685	0.671457	25.57	46.66	32.7	226	52.5	21.5	7.99	31.77	44.76
1150717029	protein DELETION OF SUV3 SUPPRESSOR 1(I)-like [Asparagus officinalis]	8.315	15	1	15	1	75	9	3.88	26.09	1	2.6	2.213	0.561	0.655998	0.87972	0.501735	32.25	68.36	33.19	46.3	162.5	91.2	59.72	28.54	15.09
1150749405	glutaredoxin-like [Asparagus officinalis]	6.862	20	1	2	1	120	13.4	7.78	4.65	1	0.173	0.309	1.153	0.655998	0.910432		4.96	37.31	75	204.7	39.5	55.8	26.88	40.17	46.03
1150670799	actin-depolymerizing factor [Asparagus officinalis]	10.946	10	1	10	1	143	16.6	7.33	14.81	1	0.221	0.156	0.709	0.700184	0.747527	0.916613	30	17.86	59.24	217.9	48.1	34.1	40.91	67.42	44.92
1150705621	LOW QUALITY PROTEIN: cyclin-dependent kinases regulatory subunit 1-like [Asparagus officinalis]	6.356	21	1	3	1	85	10.3	9.09	2.88	1	0.189	0.304	0.914	0.709159	0.905257		10.14	42.67	40.97	203.5	49.1	47.4	28.79	58.05	47.77
Q41852	40S ribosomal protein S21 OS=Zea mays OX=4577 GN=RPS21 PE=3 SV=1	2.296	10	1	26	1	81	9	8.18	51.95	1	0.33	0.801	2.426	0.71327	0.986689	0.0461587	2.92	21.78	16.45	134.6	46.3	119.1	21.52	5.91	17.37
1150693287	thioredoxin H1-like [Asparagus officinalis]	8.028	11	1	12	1	110	12.3	5.22	18.72	1	0.26	0.3	1.155	0.716189	0.893591	0.957798	1.51	101.74	79.33	202.8	52.2	45	17.44	31.37	104.32
1150740729	uncharacterized protein LOC109822656 [Asparagus officinalis]	1.629	15	1	1	1	75	8.1	9.35	0	1	2.357	2.996	1.271	0.731647	0.802151	0.918093	8.14	38.35	24.48	46.4	109.1	144.5	5.99	4.71	24.78
1150712472	late embryogenesis abundant protein 46-like [Asparagus officinalis]	8.388	11	1	7	1	134	14.5	9.82	9.52	1	2.209	1.97	0.793	0.739472	0.893591	0.916613	18.36	12.46	26.57	60.7	133.4	105.9	18.91	7.52	26.99
1150741021	uncharacterized protein At2g39795, mitochondrial-like, partial [Asparagus officinalis]	7.923	12	1	4	1	235	26.7	4.67	5.26	1	0.199	0.212	0.878	0.748094	0.864568		28.49	3	80.8	213.3	40.5	46.1	6.56	34.35	58.52
1150687151	sm-like protein LSM5 [Asparagus officinalis]	1.91	11	1	1	1	87	9.6	4.75	1.85	1	0.246	0.144	0.487	0.76731	0.779559	0.43052	24.82	11.27	22.62	221.3	48.2	30.5	16.37	30.07	36.22
1150739096	selenoprotein H-like, partial [Asparagus officinalis]	5.056	10	1	7	1	121	13.1	9.23	15.31	1	2.472	0.735	0.297	0.772577	0.985953	0.0489082	9.99	71.86	57.03	71.3	176.3	52.4	31.15	12.14	38.81
Q680P8	40S ribosomal protein S29 OS=Arabidopsis thaliana OX=3702 GN=RPS29A PE=3 SV=2	2.938	18	1	4	1	56	6.4	10.02	6.43	1	2.033	7.974	1.195	0.778627	0.215383	0.957433	79.55	142.37	128.94	23.4	47.5	229.1	42.56	111.87	84.5
P49098	Cytochrome b5 OS=Nicotiana tabacum OX=4097 PE=2 SV=1	5.282	13	1	1	1	136	15	5.11	3	1	1.753	1.644	0.938	0.784387	0.864568	0.957433	18.25	107.92	51.9	70.1	118.6	111.3	10.79	35.55	83.31
1150707290	fasciclin-like arabinogalactan protein 1 [Asparagus officinalis]	2.534	12	1	1	1	175	18	4.91	1.62	1	2.04	1.847	0.966	0.803841	0.905257	0.990161	15.91	9.46	18.22	55.2	124.7	120	24.62	14.5	15.96
1150742225	LOW QUALITY PROTEIN: protein G1-like5, partial [Asparagus officinalis]	13.235	15	1	26	1	133	15.2	9.5	84.93	1	2.067	2.83	1.362	0.80464	0.817316	0.916613	5.32	0.74	8.22	50.2	108.6	141.2	17.63	10.58	18.48
1150702299	wound-induced basic protein [Asparagus officinalis]	7.595	21	1	14	1	47	5.4	9.52	19.49	1	1.591	1.353	0.821	0.832978	0.901572	0.859906	5.01	25.56	24.77	75.7	120.5	103.8	10.7	13.85	12.02
1150687406	NADH dehydrogenase [ubiquinone] iron-sulfur protein 5-B [Asparagus officinalis]	7.849	18	1	6	1	85	10	8.1	15.33	1	2.217	1.285	0.579	0.852226	0.930055	0.671457	20.2	5.18	3.12	66.6	147.7	85.6	27.46	9.7	16.31
1150740668	cytochrome b-c1 complex subunit 6-like [Asparagus officinalis]	3.469	13	1	3	1	69	8.1	7.14	0	1	1.924	2.58	1.341	0.867963	0.852456	0.916613	33.33	40.75	7.89	45.8	112.8	141.4	31.44	14.9	16.25
1150730126	phosphatidylglycerol/phosphatidylinositol transfer protein-like [Asparagus officinalis]	5.309	11	1	1	1	160	17.4	5.05	2.17	1	0.267	0.471	1.639	0.872815	0.966238		10.61	92.49	22.56	154.3	50.5	95.3	40.68	22.01	55.05
1150740907	probable aquaporin TIP2-1 isoform X2 [Asparagus officinalis]	4.933	16	1	3	1	246	24.8	5.76	0	1	1.773	0.979	0.552	0.872815	0.967513	0.589201	15.64	19.58	1.87	56.2	157	86.7	56.52	30.21	44.01
1150747189	defensin-like protein 2 [Asparagus officinalis]	2.62	10	1	10	1	83	9.4	8.7	20.04	1	0.461	0.038	0.082	0.883759	8.74077e-05	2.75261e-15	7.71	14.38	6.34	189.3	100.9	9.8	38.28	30.95	26.05
1150722436	acyl carrier protein 2, mitochondrial-like [Asparagus officinalis]	11.44	10	1	10	1	120	13.2	5.11	26.98	1	1.699	1.65	0.881	0.883759	0.905257	0.916613	10.21	4.57	17.68	72.9	126.8	100.4	12.42	19.02	10.89
1150669996	uncharacterized protein LOC109827742 [Asparagus officinalis]	4.096	19	1	6	1	113	12.4	9.44	10.74	1	0.266	0.335	1.143	0.886986	0.9214	0.961473	50.23	14.99	40.31	182	55.1	62.9	11.84	72.79	16.8
1150696471	dolichyl-diphosphooligosaccharide--protein glycosyltransferase subunit DAD1 [Asparagus officinalis]	8.15	12	1	9	1	115	12.5	7.88	23.04	1	0.306	0.493	1.612	0.900326	0.965327	0.756528	24.68	30.41	45.72	180.6	44.5	74.9	12.41	33.45	29.17
1150737636	upstream activation factor subunit spp27-like [Asparagus officinalis]	3.674	10	1	1	1	157	17.6	10.04	0	1	0.279	0.46	1.602	0.901207	0.966238	0.771617	52.16	4.45	58.19	168.2	54.6	77.3	19.55	44.57	8.94
1150723660	protein AE7-like 1 [Asparagus officinalis]	1.664	15	1	1	1	95	10.7	7.27	0	1	0.295	0.317	1.545	0.902358	0.905257		32.5	30.26	62.69	184.6	56.9	58.5	16.12	47.81	27.01
1150747724	nudix hydrolase 26, chloroplastic-like isoform X1 [Asparagus officinalis]	8.091	13	1	6	1	167	18.9	4.83	15.05	1	0.283	0.175	0.616	0.903661	0.80828	0.804575	11.67	56.8	41.6	211.2	55.4	33.4	14.09	20.95	67.82
1150736272	upstream activation factor subunit spp27 [Asparagus officinalis]	2.219	14	1	3	1	111	12.2	10.05	0	1	0.296	0.343	0.944	0.925948	0.92641	0.995825	27.28	16.3	30.99	192.7	55.2	52.1	14.77	32.31	25.11
O49636	Mitochondrial pyruvate carrier 4 OS=Arabidopsis thaliana OX=3702 GN=MPC4 PE=3 SV=1	10.343	25	1	6	1	108	12	9.35	18.52	1	0.348	0.142	0.768	0.931663	0.690121	0.916613	45.76	35.59	17.68	200.7	63.1	36.2	18.18	43.9	35.67
1150734962	HVA22-like protein a isoform X1 [Asparagus officinalis]	5.147	15	1	5	1	185	21.6	6.79	0	1	0.313	0.299	1.132	0.931663	0.905257		33.25	23.13	13.79	191.2	59.9	48.9	13.39	37.97	43.19
1150739278	replication protein A 14 kDa subunit-like [Asparagus officinalis]	8.621	18	1	2	1	106	11.5	7.12	5.26	1	0.326	0.084	0.205	0.940913	0.338776	0.0121266	47.92	37.66	26.43	214.3	69.9	15.8	9.19	50.54	69.3
1150704190	mitochondrial intermembrane space import and assembly protein 40 homolog, partial [Asparagus officinalis]	3.383	18	1	2	1	132	14.4	4.63	0	1	1.6	1.67	0.829	0.940913	0.875739	0.954783	20.67	23.92	30.53	68.5	117.1	114.4	7.06	22.27	39.47
1150742916	uncharacterized protein LOC109823697 [Asparagus officinalis]	6.579	32	1	4	1	69	7.3	6.58	7.12	1	0.337	0.27	0.638	0.940913	0.893591		64.22	37.94	60	171.3	78.6	50.1	19.97	75.65	39.38
1150736518	membrane magnesium transporter [Asparagus officinalis]	3.894	15	1	2	1	106	11.6	6.93	2.4	1	0.36	0.316	0.412	0.940913	0.905257		7.62	111.8	57.33	171.3	74.5	54.2	42.43	64.06	71.51
1150744717	LOW QUALITY PROTEIN: nuclear transport factor 2-like [Asparagus officinalis]	6.097	19	1	2	1	118	13	6.93	6.89	1	0.329	0.423	1.781	0.940913	0.961383	0.657599	46.66	41.16	74.86	156.7	51.6	91.8	51.3	28.12	29.98
1150684340	uncharacterized protein LOC109830471 [Asparagus officinalis]	3.227	17	1	15	1	63	7.6	5.87	34.49	1	1.501	1.132	0.739	0.940913	0.961383	0.876706	3.02	25.92	11.07	83.8	125.8	90.4	11.85	5.58	17.22
Q0DGG8	Probable serine acetyltransferase 5 OS=Oryza sativa subsp. japonica OX=39947 GN=SAT5 PE=2 SV=2	2.217	10	1	1	1	340	35.8	8.05	2.65	1	0.34	0.485	1.429	0.940913	0.967513	0.880387	0.09	104.23	62.92	157.2	53.4	89.4	50.83	18.49	35.97
1150740732	protein FATTY ACID EXPORT 2, chloroplastic [Asparagus officinalis]	2.094	17	1	1	1	110	11.2	10.14	0	1	1.443	0.906	0.469	0.940913	0.967513		50.01	98.11	109.48	78.2	151	70.8	45.26	66.86	65.8
1150736463	bifunctional pinoresinol-lariciresinol reductase-like [Asparagus officinalis]	8.001	11	1	1	1	123	13.6	8.82	3.58	1	0.325	0.487	1.018	0.940913	0.968619	0.995088	47.37	45.75	57.57	157.5	69.5	73	49.72	17.54	44.72
1150719650	uncharacterized protein LOC109845529 [Asparagus officinalis]	5.339	28	1	5	1	80	8.9	9.58	8.14	1	0.43	0.186	0.789	0.949282	0.80192	0.921527	17.65	66.89	81.1	184.7	73.6	41.6	14.07	55.12	67.51
1150678235	upstream activation factor subunit spp27-like [Asparagus officinalis]	8.867	30	1	7	1	76	8.5	9.6	23.97	1	0.432	0.201	0.464	0.949282	0.857113	0.453996	11.66	26.05	40.93	184.4	78.6	37	7.83	27.65	47.92
1150747920	small nuclear ribonucleoprotein E-like [Asparagus officinalis]	3.807	10	1	3	1	88	10.4	10.08	3.87	1	0.42	0.272	0.436	0.949282	0.886176	0.447754	3.32	79.18	101.61	176.2	74.1	49.8	9.87	32.59	82.99
1150746883	uncharacterized protein LOC109825215 isoform X1 [Asparagus officinalis]	27.456	16	1	45	1	173	19.4	9.64	30.13	1	1.417	1.593	1.119	0.949282	0.905257	0.954783	36.47	35.68	0.63	74.8	106	119.2	11.66	15.49	21.41
1150718326	LOW QUALITY PROTEIN: 18.6 kDa class III heat shock protein-like, partial [Asparagus officinalis]	5.361	12	1	3	1	109	12.4	8.62	5.44	1	0.373	0.293	0.91	0.949282	0.905257		11.39	20.1	75.17	185.1	69	45.9	12.09	58.76	20.31
1150714412	water stress-inducible protein Rab21-like [Asparagus officinalis]	6.948	19	1	2	1	171	17.9	8.76	0	1	1.296	0.379	0.793	0.949282	0.934163		131.89	125.07	103.87	86.7	112.4	100.9	88.99	53.29	77.74
Q1H595	Sm-like protein LSM2 OS=Arabidopsis thaliana OX=3702 GN=LSM2 PE=1 SV=1	6.086	15	1	3	1	93	10.7	7.44	5.01	1	1.323	1.072	0.763	0.949282	0.96419	0.916613	1.79	20.21	13.45	87.1	120	92.9	2.54	3.52	14.92
1150677684	LOW QUALITY PROTEIN: syntaxin-22-like [Asparagus officinalis]	8.434	11	1	3	1	273	30	5.92	3.11	1	0.446	0.92	1.48	0.950002	0.982884	0.819707	47.63	8.1	129.93	183.1	47.1	69.7	55.2	77.69	108.29
1150735822	mavicyanin-like [Asparagus officinalis]	8.906	12	1	5	1	202	22	8.81	5.26	1	0.432	0.181	0.78	0.953804	0.739352		83.9	68.62	83.58	180.5	72.9	46.5	54.25	48.56	79.36
1150683654	protein FAM136A [Asparagus officinalis]	8.878	18	1	2	1	149	17.1	6.38	2.83	1	1.063	0.814	0.579	0.955272	0.98377		44.4	92.51	9.12	112	119.1	68.9	70.25	13.42	28.62
1150686135	acyl carrier protein 2, mitochondrial-like, partial [Asparagus officinalis]	1.735	10	1	1	1	115	12.7	4.63	0	1	1.095	0.69	0.63	0.956189	0.994357	0.664058	15.79	77.69	61.17	101.7	121.6	76.7	5.15	15.88	85.67
1150677630	transmembrane protein 208 homolog [Asparagus officinalis]	2.138	10	1	2	1	173	19.6	9.73	0	1	1.046	1.201	1.149	0.958244	0.919359		17.64	4.92	10.02	103.5	73.7	122.8	21.21	66.1	21.62
1150711245	mitochondrial fission 1 protein A-like [Asparagus officinalis]	17.393	10	1	40	1	164	17.5	8.29	85.53	1	1.225	1.108	0.762	0.958943	0.962593	0.892909	17.92	10.49	18.67	95.9	116.2	87.9	18.52	0.94	15.42
1150695513	protein Asterix [Asparagus officinalis]	5.085	13	1	7	1	100	11.4	8.9	3.47	1	0.462	0.536	1.223	0.958943	0.983298	0.922029	7.94	24.28	20.03	146.9	67.8	85.3	22.89	2.38	47.74
Q9SY09	Small nuclear ribonucleoprotein SmD1b OS=Arabidopsis thaliana OX=3702 GN=SMD1B PE=3 SV=1	3.485	11	1	2	1	116	12.7	11.22	0	1	0.495	0.177	0.457	0.959365	0.807193	0.486922	30.72	32.44	136.49	178.3	88.2	33.4	14.64	78.34	33.33
1150669161	uncharacterized protein LOC109827341 [Asparagus officinalis]	4.638	12	1	6	1	118	13.4	9.13	10.43	1	1.156	1.355	1.156	0.959365	0.919199	0.957611	22.39	1.91	35.74	85.9	99.3	114.8	9.36	16.95	13.89
Q7M258	Ferredoxin-2 (Fragment) OS=Pisum sativum OX=3888 PE=1 SV=1	1.673	23	1	2	1	40	4.4	4.44	4.08	1	1.242	1.319	1.061	0.959365	0.942726	0.98702	10.66	0.93	22.33	87.1	115.9	97	29.82	36.43	29.7
1150713654	universal stress protein A-like protein [Asparagus officinalis]	2.754	10	1	1	1	163	18.1	6.19	0	1	0.467	0.505	1.499	0.959365	0.975448	0.834353	9.2	41.31	130.93	162.1	56.1	81.8	38.22	73.21	56.07
1150728787	non-symbiotic hemoglobin 1-like [Asparagus officinalis]	8.811	10	1	3	1	162	18.3	8.56	3.63	1	0.479	1.154	1.302	0.95983	0.930055	0.916613	34.16	83.07	53.39	94.6	89.2	116.2	92.62	52.04	3.88
1150729773	uncharacterized protein LOC109850150 [Asparagus officinalis]	3.797	19	1	2	1	108	12.3	9.77	0	1	0.493	0.409	0.893	0.95983	0.95641	0.989647	23.53	10.58	10.47	154.1	78.1	67.9	18.35	34.49	53.61
1150682301	glutaredoxin-C1-like [Asparagus officinalis]	2.406	12	1	1	1	103	11.1	6.76	0	1	0.493	0.345	0.699	0.960709	0.919199	0.916613	46.32	93.81	106.77	128.6	99.5	71.8	65.03	36.56	89.23
1150686301	probable prefoldin subunit 3, partial [Asparagus officinalis]	6.605	11	1	1	1	186	20.9	5.05	3.31	1	1.015	0.858	0.852	0.961774	0.976046	0.978732	1.23	41.55	40.66	104.7	105.4	89.9	13.08	18.64	29.74
1150706816	RNA polymerase II transcriptional coactivator KELP [Asparagus officinalis]	1.753	10	1	1	1	175	20.6	4.65	0	1	0.927	0.932	1.005	0.965972	0.962593		36.03	35.61	85.57	105	97.3	97.8	5.55	40.74	35.33
1150684457	microsomal glutathione S-transferase 3-like [Asparagus officinalis]	10.641	12	1	16	1	144	16.3	9.19	42.36	1	0.615	0.283	0.52	0.967259	0.893591	0.446467	14.04	18.5	1.89	159.6	95.1	45.3	8.06	7.07	78.99
1150708711	immediate early response 3-interacting protein 1-like isoform X1 [Asparagus officinalis]	4.166	10	1	5	1	115	13	10.33	10.76	1	1.019	1.088	0.881	0.967259	0.966238	0.974307	31.12	16.49	7.57	92.9	109.8	97.3	14.57	28.57	4.75
Q940X7	RING-box protein 1a OS=Arabidopsis thaliana OX=3702 GN=RBX1A PE=1 SV=1	5.717	12	1	2	1	118	13.2	6.65	4.22	1	0.996	0.848	1.683	0.967259	0.98003	0.668938	52.44	2.43	73.24	74	114	112	54.28	76.41	68.73
1150725790	uncharacterized protein LOC109848567 [Asparagus officinalis]	2.431	15	1	1	1	130	14.7	4.79	0	1	0.903	0.855	0.947	0.967341	0.97021		10.51	42.24	49.26	108.8	98.2	93	15.78	25.57	19.24
1150744931	NADH dehydrogenase [ubiquinone] 1 alpha subcomplex subunit 2 [Asparagus officinalis]	5.5	12	1	6	1	98	11.3	9.57	13.28	1	1.086	0.634	0.668	0.975174	0.965327	0.545401	18.29	32.73	24.8	109.5	118.3	72.1	2.32	19.41	81.55
1150715307	protein BOLA1, chloroplastic-like [Asparagus officinalis]	1.599	10	1	1	1	116	13	7.15	0	1	0.874	0.724	0.828	0.975174	0.986255		2.17	18.52	81.94	115.5	100.9	83.6	10.32	41.16	32.05
1150737376	LOW QUALITY PROTEIN: probable inactive receptor kinase At2g26730, partial [Asparagus officinalis]	3.629	10	1	4	1	187	20.4	4.73	4.19	1	0.886	1.161	1.139	0.983309	0.949627	0.957433	19.44	37.87	1.42	108.2	89.7	102.1	13.17	8.87	30.76
1150740927	mitochondrial import inner membrane translocase subunit Tim13-like [Asparagus officinalis]	15.878	18	1	9	1	90	9.8	5.99	16.47	1	0.601	0.512	1.102	0.986803	0.966238	0.973629	45.17	69.92	2.45	142	85.4	72.7	18.52	58.42	60.16
1150703465	LOW QUALITY PROTEIN: probable splicing factor, arginine/serine-rich 6 [Asparagus officinalis]	9.282	10	1	8	1	278	30.6	5.81	17.95	1	0.587	0.283	0.482	0.987529	0.908206	0.494379	23.95	4.16	33.53	155.2	97.7	47.1	7.46	68.04	28.13
Q8LC68	NAP1-related protein 2 OS=Arabidopsis thaliana OX=3702 GN=NRP2 PE=1 SV=2	1.913	10	1	1	1	255	29.3	4.3	0	1	0.586	0.316	0.526	0.991268	0.905257	0.671457	3.52	25.23	87.13	177.8	80.1	42.1	16.52	33.83	35.3
Q41898	ATP synthase subunit epsilon, mitochondrial OS=Zea mays OX=4577 PE=3 SV=1	4.022	13	1	2	1	70	7.8	8.5	5.37	1	0.736	0.343	0.612	0.991268	0.910432	0.603444	22.54	14.94	38.59	142.3	100	57.7	11.5	14.65	31.55
1150670108	H/ACA ribonucleoprotein complex subunit 3-like protein [Asparagus officinalis]	1.992	23	1	1	1	64	7.4	9.94	0	1	0.582	0.982	1.256	0.991268	0.966238		46.2	21.92	11.22	134.2	63.3	102.5	28.58	43.05	25.03
1150728021	reactive oxygen species modulator 1-like [Asparagus officinalis]	6.801	46	1	1	1	74	7.4	9.64	3.04	1	0.83	0.347	0.715	0.991757	0.92641	0.916613	8.44	66.58	45.94	168.8	64.4	66.8	46.87	57.47	80.63
1150749148	succinate dehydrogenase subunit 7, mitochondrial-like [Asparagus officinalis]	3.073	13	1	3	1	86	9.6	10.14	6.18	1	0.881	0.882	0.889	0.991757	0.98377	0.95977	6.25	18.55	12.69	104.9	103.3	91.8	8.51	9.66	20.14
1150712624	uncharacterized protein LOC109842595 [Asparagus officinalis]	15.725	14	1	28	1	73	8.5	10.27	67.12	1	0.69	0.158	0.362	0.993913	0.734853	0.14968	50.03	45.81	39.76	161.1	113	25.9	2.75	49.39	79.62
1150748760	uncharacterized protein LOC109825998 [Asparagus officinalis]	9.895	13	1	2	1	194	21.1	9.47	2.62	1	0.669	0.301	0.584	0.993913	0.905257	0.664058	41.89	66.18	77.1	159.6	92.3	48.1	9.62	60.52	66.9
1150682681	metallothionein-like protein type 2 [Asparagus officinalis]	1.446	12	1	1	1	78	7.8	4.89	0	1	0.655	1.031	0.971	0.993913	0.950938	0.995088	26.92	47.4	89.62	90.3	106.4	103.3	40.59	122.7	7.77
1150744568	cationic peroxidase SPC4-like [Asparagus officinalis]	3.574	12	1	2	1	165	17.5	7.28	0	1	0.632	0.507	0.898	0.993913	0.975792	0.990161	26.16	15.79	7.22	144.1	82.9	73	14.31	42.51	1.66
1150669874	plant UBX domain-containing protein 10-like, partial [Asparagus officinalis]	7.27	12	1	3	1	205	22.8	6.11	9.96	1	0.693	0.249	0.359	0.994359	0.901572	0.195607	3.7	18.14	14.81	162.3	102.5	35.2	7.77	8.59	35.71
1150736971	early nodulin-93-like [Asparagus officinalis]	8.147	18	1	4	1	98	10.2	10.29	4.41	1	0.729	0.7	0.889	0.994359	0.996327		6.22	11.98	47.45	114.9	110.6	74.5	31.1	18.73	49.16
P56331	Eukaryotic translation initiation factor 1A OS=Onobrychis viciifolia OX=3882 PE=2 SV=2	14.773	11	1	4	1	145	16.4	5.35	9.72	1	0.79	0.194	0.246	0.99516	0.811234	0.00926996	24.01	5.7	21.84	169	107.9	23.1	23.76	84.06	35.54
1150717775	nudix hydrolase 1 [Asparagus officinalis]	6.019	12	1	1	1	148	16	4.83	2.03	1	0.652	0.552	0.906	0.996103	0.98377	0.990806	6.79	9.57	77.43	153.8	76.7	69.5	16.15	38.13	30.42
1150728647	uncharacterized protein C6C3.02c-like isoform X1 [Asparagus officinalis]	3.596	31	1	1	1	145	14.8	8.9	0	1	0.73	0.883	1.316	0.996275	0.974473		13.12	26.09	17.03	114.2	85	100.8	1.5	11.04	33.54
1150748520	mitochondrial import inner membrane translocase subunit TIM8 [Asparagus officinalis]	4.931	14	1	2	1	74	8.4	7.75	0	1	0.682	0.362	0.531	0.996716	0.934163	0.657599	6.29	2.88	27.12	147	104.1	48.8	7.37	17.88	23.58
1150678723	mitochondrial import inner membrane translocase subunit Tim13-like isoform X1 [Asparagus officinalis]	8.367	18	1	9	1	88	9.5	5.99	17.06	1	0.685	0.493	0.719	0.996716	0.98003	0.916613	24.21	6.59	21.06	138.3	94.1	67.7	9.63	38.21	15.11
1150670052	NADH dehydrogenase [ubiquinone] 1 alpha subcomplex subunit 1 [Asparagus officinalis]	5.965	20	1	3	1	66	7.4	8.84	6.75	1	0.749	1.088	1.528	0.997415	0.949012	0.788485	43.13	12.32	4.4	111.5	83.5	105	24.38	29.29	22.01
P51424	60S ribosomal protein L39-1 OS=Arabidopsis thaliana OX=3702 GN=RPL39A PE=3 SV=2	8.14	20	1	13	1	51	6.4	12.31	35.73	1	0.879	0.337	0.634	0.997789	0.818237	0.461951	26.64	105.17	61.35	134.3	116.3	49.4	14.97	21.78	86.85
1150699430	heavy metal-associated isoprenylated plant protein 39-like isoform X1 [Asparagus officinalis]	3.708	11	1	1	1	91	10.1	9.2	1.94	1	0.72	0.421	0.584	0.997789	0.94002	0.757061	16.14	81.77	88.29	117.3	111.9	70.7	23.37	25.15	66.39
1150691814	cytochrome b-c1 complex subunit 8-like [Asparagus officinalis]	5.472	17	1	15	1	72	8.3	9.66	33.23	1	0.921	0.573	0.699	0.999387	0.961383	0.771617	20.52	10.01	1.73	116.9	107.7	75.3	25.5	39.92	19.88
1150677420	60S ribosomal protein L37-3-like [Asparagus officinalis]	12.938	14	2	32	2	95	10.8	11.96	60.93	2	32.532	58.006	1.274	9.17583e-06	2.0432e-08	0.862467	25.26	14.45	115.73	3.3	88.3	208.4	33.53	59.09	77.49
1150730564	LOW QUALITY PROTEIN: fasciclin-like arabinogalactan protein 12 [Asparagus officinalis]	15.427	26	2	11	2	210	22.3	10.24	50.29	2	0.038	0.025	0.848	0.000140077	0.000308724		8.65	60.73	31.63	281.9	10.5	7.7	27.37	11.56	33.02
1150736212	40S ribosomal protein S21 [Asparagus officinalis]	10.027	18	2	37	1	82	9.1	7.34	91.47	2	22.21	16.307	1.03	0.00110963	0.111922	0.995088	50.33	10.85	41.67	5	148.9	146.1	56.87	20.45	40.9
P37142	Bifunctional aspartokinase/homoserine dehydrogenase, chloroplastic (Fragment) OS=Daucus carota OX=4039 PE=1 SV=1	3.935	2	2	29	1	921	100.2	7.15	8.71	2	6.3	6.264	0.994	0.00611968	0.0169653	0.994916	44.29	45	1.01	22.6	139.6	137.8	45.82	17.53	5.33
1150684945	uncharacterized protein LOC109830678 isoform X1 [Asparagus officinalis]	5.023	6	2	16	1	313	35.7	5.2	16.26	2	0.047	0.05	0.815	0.00611968	0.0560046	0.962595	36.37	46.59	39.72	274.5	11.7	13.8	22.41	30.77	32.81
1150718774	peroxisomal 2,4-dienoyl-CoA reductase-like [Asparagus officinalis]	10.479	7	2	23	2	294	31.5	9.48	49.87	2	5.581	5.555	1.032	0.0252531	0.0487049	0.99536	19.92	15.31	16.89	22.3	142.8	134.9	11.84	17.56	9.04
Q0IUB5	V-type proton ATPase 16 kDa proteolipid subunit OS=Oryza sativa subsp. japonica OX=39947 GN=VATP-P1 PE=2 SV=1	25.946	28	2	20	2	165	16.7	8.46	77.26	2	0.105	0.059	0.464	0.0353545	0.0183104	0.394135	47.41	44.16	32.25	258.8	27.1	14.1	15.89	25.46	36.6
1150699143	LOW QUALITY PROTEIN: uricase-2 isozyme 1 [Asparagus officinalis]	7.309	7	2	7	2	309	34.6	8.76	9.24	2	5.691	5.522	0.97	0.0403771	0.222148	0.977475	6.32	7.18	0.75	24.6	139.8	135.6	32.36	18.81	18.25
1150737472	probable linoleate 9S-lipoxygenase 5 [Asparagus officinalis]	5.68	3	2	33	1	617	70.3	7.03	79.81	2	11.558	100	6.072	0.0436481	2.75958e-15	1.08136e-13	32.14	0	14.01	1.5	24.9	273.6	26.79	67.55	54.2
1150710764	60S ribosomal protein L35a-4 [Asparagus officinalis]	29.74	27	2	55	1	112	12.7	10.45	189.66	2	0.07	0.169	0.91	0.0542595	0.721767	0.990161	92.19	60.84	76.6	242.3	17.1	40.6	1.52	82.81	74.77
1150749578	probable linoleate 9S-lipoxygenase 5 [Asparagus officinalis]	6.298	2	2	40	1	869	98.2	5.91	97.27	2	6.911	1.463	1.113	0.0621075	0.919359	0.967567	120.07	68.81	19.23	11.9	127.6	160.5	133.32	27.27	79.28
1150687506	CTP synthase-like [Asparagus officinalis]	10.057	7	2	6	2	519	57.3	6.16	17.34	2	0.124	0.214	1.72	0.0660684	0.567624	0.686197	30.84	22.66	7.09	213.3	32.3	54.4	25.63	23.85	12.28
1150690453	haloacid dehalogenase-like hydrolase domain-containing protein At3g48420 [Asparagus officinalis]	7.154	6	2	12	2	370	40.2	8.65	7.37	2	0.053	0.281	3.887	0.0706509	0.905257		42.42	55.02	107.27	227.6	14.8	57.6	39.08	90.27	8
1150687902	inactive protein RESTRICTED TEV MOVEMENT 2-like [Asparagus officinalis]	19.903	22	2	12	2	202	22.9	4.96	27.86	2	0.119	0.111	0.77	0.101262	0.303836	0.918093	25.21	67.05	30.43	250.2	23.2	26.6	41.63	40.24	82.12
1150708561	cytochrome B5-like protein isoform X1 [Asparagus officinalis]	5.667	20	2	10	2	120	13.1	5.82	3.41	2	5.078	4.237	1.162	0.16339	0.425499	0.916613	48.12	14.46	41.77	27.4	139.3	133.3	24.27	24.78	18.52
1150669333	non-specific lipid-transfer protein-like 1 [Asparagus officinalis]	11.394	21	2	8	2	124	13.4	9.28	18.25	2	0.124	0.149	1.197	0.189147	0.594553	0.937476	44.89	12.13	13.52	244.9	24.6	30.5	26.56	77.29	36.56
1150706627	50S ribosomal protein L21, mitochondrial-like [Asparagus officinalis]	6.901	13	2	4	2	268	30.1	5.83	6.9	2	3.686	11.509	2.199	0.19309	0.000500148	0.0185011	65.8	9.64	17.82	33.4	68.4	198.3	40.41	79.13	72.08
1150722585	2'-deoxymugineic-acid 2'-dioxygenase-like isoform X2 [Asparagus officinalis]	22.209	12	2	21	1	338	37.9	4.89	38.22	2	0.078	0.081	1.276	0.200681	0.471471		32.84	90.27	120.27	259.1	20.2	20.7	15.37	57.54	79.12
1150673495	dehydrin DHN1-like [Asparagus officinalis]	13.828	24	2	27	1	109	11.7	9.28	69.78	2	6.82	11.694	1.377	0.214936	0.196914	0.876706	8.02	54.44	31.4	15.2	110.5	174.3	31.53	39.36	20.56
1150747830	translocon-associated protein subunit alpha-like [Asparagus officinalis]	30.719	11	2	11	2	255	27.7	5.05	30.79	2	0.116	0.143	1.204	0.215443	0.662658	0.932464	1.87	9.84	14.26	238.2	27.7	34.1	3.64	5.16	19.88
1150672617	uncharacterized protein LOC109847090 [Asparagus officinalis]	8.818	15	2	10	2	122	13.9	9.01	20.82	2	0.128	0.115	0.936	0.240747	0.453223	0.995088	30.59	45.9	7.21	241.4	31	27.6	4.2	30.4	49.23
1150745478	1-aminocyclopropane-1-carboxylate oxidase [Asparagus officinalis]	7.328	6	2	8	2	298	33.9	5.11	6.42	2	6.474	5.657	0.763	0.241647	0.376743	0.916613	49.89	24.76	18.8	35.1	141.4	123.5	31.13	69.07	74.52
1150683576	glutathione S-transferase zeta class-like isoform X1 [Asparagus officinalis]	13.103	14	2	23	2	250	28.3	8.59	22.8	2	0.191	0.315	1.648	0.272683	0.856511	0.696826	12.46	37.49	50.14	200	41.8	58.1	25.75	19.04	55.03
1150696806	LOW QUALITY PROTEIN: caffeoyl-CoA O-methyltransferase-like [Asparagus officinalis]	8.753	12	2	8	1	202	22.7	5.91	15.07	2	0.125	0.107	0.759	0.273176	0.510299	0.916613	29.77	52.87	40.74	233.2	41.9	24.9	38.04	38.74	100.84
P49031	Probable sucrose-phosphate synthase OS=Beta vulgaris OX=161934 GN=SPS PE=2 SV=1	4.638	3	2	4	1	1045	118.1	6.58	7.97	2	5.695	3.197	0.561	0.297984	0.551115	0.603444	82.18	71.22	132.29	30.3	172.7	96.9	20.25	76.66	56.88
P52777	Phenylalanine ammonia-lyase OS=Pinus taeda OX=3352 GN=PAL PE=3 SV=1	5.387	3	2	4	2	754	82.5	5.87	2.24	2	4.188	4.81	1.013	0.304288	0.603589	0.995088	0.18	16.86	19.87	31	137.9	131.1	32.72	15.88	30.85
1150714549	uncharacterized protein LOC109843400 [Asparagus officinalis]	5.245	14	2	10	2	122	13.9	8.97	14.21	2	0.177	0.119	0.673	0.307707	0.311669	0.90717	11.64	67.14	23.83	234.6	40.2	25.2	7.42	30.71	55.97
1150739487	cysteine proteinase inhibitor 1-like [Asparagus officinalis]	10.484	19	2	14	2	118	13.1	9.63	24.12	2	3.834	4.736	1.288	0.344386	0.373869	0.826944	27.99	6.3	2.45	29.6	132.6	137.8	11.44	42.18	40.44
1150683560	uncharacterized protein LOC109830183 [Asparagus officinalis]	8.849	21	2	16	2	146	16.5	9.01	25.35	2	3.667	5.097	1.39	0.357692	0.286327	0.647893	3.15	24.79	21.19	30.7	112.7	156.6	16.39	1.82	20.75
1150744713	protein phosphatase methylesterase 1 isoform X1 [Asparagus officinalis]	11.707	9	2	10	2	345	38	5.99	13.34	2	0.153	0.197	1.29	0.358084	0.721767	0.916613	3.22	82.32	69.24	219.4	37.3	43.2	8.46	6.69	74.52
1150709591	pathogenesis-related protein 1-like [Asparagus officinalis]	6.722	14	2	12	2	156	16.9	7.33	17.66	2	3.333	4.473	1.342	0.377466	0.359731	0.719774	23.83	75.27	48.23	32.5	114.2	153.3	3.31	16.66	51.39
1150687336	40S ribosomal protein S21-like [Asparagus officinalis]	11.619	18	2	32	1	82	9.1	7.34	71.48	2	4.658	4.842	0.767	0.401084	0.402219	0.916613	17.66	28.86	38.87	30.4	161.4	108.2	27.71	38.03	45.61
O80837	Remorin OS=Arabidopsis thaliana OX=3702 GN=DBP PE=1 SV=1	4.006	8	2	15	1	190	21	8.54	30.2	2	3.423	6.499	2.451	0.411369	0.204968	0.201024	15.12	50.21	21.16	28.7	93.6	177.7	3.04	41.39	38.49
1150686907	nucleolar protein 56-like [Asparagus officinalis]	8.586	5	2	8	2	558	62.2	8.5	7.28	2	4.364	2.211	0.507	0.431241	0.800203	0.461951	0.2	103.82	8.29	43.8	190.8	65.4	65.34	27.15	58.6
1150731003	cytochrome b-c1 complex subunit 7-2-like [Asparagus officinalis]	6.997	15	2	7	1	124	14.6	9.91	10.71	2	0.159	0.158	0.827	0.443301	0.766954	0.955876	21.36	56.56	8.83	227.8	36.1	36.1	4.87	66.64	57.3
1150739177	LOW QUALITY PROTEIN: protein YLS3-like [Asparagus officinalis]	8.299	13	2	10	2	183	19.1	8.92	25.11	2	2.775	3.101	1.038	0.45738	0.551115	0.995088	20.06	26.15	7.67	42	113.7	144.3	6.86	23.06	22.56
1150691398	glutamate--glyoxylate aminotransferase 2 [Asparagus officinalis]	9.717	8	2	5	2	480	53.3	7.64	9.4	2	0.13	0.11	1.191	0.472184	0.614333	0.946676	68.44	6.18	22.94	239.5	35.1	25.4	9.09	52.01	40.56
1150696691	uncharacterized protein LOC109835716 isoform X1 [Asparagus officinalis]	5.688	4	2	52	2	484	53.6	6	83.33	2	2.466	3.865	1.742	0.479483	0.160279	0.192873	14.03	14.62	3.14	46.3	92.5	161.2	19.94	28.39	15.39
1150674855	cytochrome P450 71A1-like [Asparagus officinalis]	16.242	10	2	41	2	207	23.7	5.92	82.91	2	3.125	6.392	2.53	0.489017	0.237306	0.0354335	28.37	13.12	56.72	30.2	76.4	193.3	28.45	40.44	2.65
1150694351	protein SPIRAL1-like 3 [Asparagus officinalis]	30.1	31	2	73	2	97	9.9	9.09	227.2	2	2.419	2.764	1.003	0.489017	0.392562	0.995088	8.03	2.01	0.03	46	126.8	127.2	23.56	27.64	18.04
1150697680	endoplasmic reticulum metallopeptidase 1 [Asparagus officinalis]	10.624	2	2	16	2	919	100.6	7.47	36.2	2	3.446	5.636	1.616	0.489017	0.510299	0.586185	100.05	100.63	1.81	29.8	102.5	167.7	80.99	14.8	7.12
1150697671	probable aquaporin PIP2-3 [Asparagus officinalis]	30.54	19	2	18	1	285	30	7.46	63.78	2	0.138	0.22	1.674	0.489017	0.839602		16.35	1.85	6.51	212.2	32.8	55	20.85	25.96	17.82
1150693030	UDP-glycosyltransferase 85A2-like [Asparagus officinalis]	6.352	5	2	13	2	479	53.4	5.77	17.92	2	3.109	2.986	0.956	0.501635	0.807193	0.995088	0.75	12.72	12.4	53.5	126	120.4	18.38	24.56	35.63
1150693788	uncharacterized protein LOC109834240 [Asparagus officinalis]	7.677	24	2	12	2	92	9.7	8.22	23.76	2	0.265	0.169	0.792	0.505862	0.402219	0.918093	3.49	23.64	35.96	214.5	52.2	33.3	7.26	16.31	47.19
1150734024	uncharacterized protein LOC109819624 isoform X2 [Asparagus officinalis]	18.005	12	2	33	1	257	27.3	8.32	42.11	2	0.188	0.208	1.304	0.550971	0.818237	0.916613	30.56	3.87	32.15	212.6	44.2	43.2	18.58	17.19	39.87
1150672094	ATP-dependent Clp protease proteolytic subunit 3, chloroplastic [Asparagus officinalis]	10.548	21	2	8	2	252	27.6	6.13	2.12	2	0.179	0.405	2.262	0.559838	0.944799	0.278302	1.51	2.26	70.34	186.7	38.7	74.7	9.64	35.05	50.4
1150735363	probable calcium-binding protein CML49 [Asparagus officinalis]	18.397	14	2	15	2	187	20.6	6.02	34.42	2	0.286	0.099	0.438	0.581486	0.163553	0.232616	25.05	30.68	62.27	210.8	68.3	20.9	21.35	60.62	43.14
P53535	Alpha-1,4 glucan phosphorylase L-2 isozyme, chloroplastic/amyloplastic OS=Solanum tuberosum OX=4113 GN=STP-1 PE=1 SV=1	4.237	2	2	4	2	974	110.6	5.3	7.71	2	2.497	3.35	1.174	0.592383	0.531288	0.916613	12.57	2.56	24.15	47.9	119.5	132.6	14.35	3.56	17.38
1150679315	serine/threonine-protein phosphatase PP1 [Asparagus officinalis]	5.5	6	2	3	1	322	36.4	5.62	3.37	2	0.166	0.785	4.462	0.602672	0.999557	0.00644273	7.99	83.19	80.57	153	26.9	120.1	10.53	32.01	67.45
1150673812	eukaryotic translation initiation factor 5A-1-like [Asparagus officinalis]	6.782	7	2	29	1	128	14.3	6.68	61	2	3.438	14.831	4.045	0.631101	0.128419	0.000943964	108.34	9.27	72.73	12.3	42.4	245.3	50.6	85.1	32.25
1150709979	phosphoenolpyruvate phosphatase-like [Asparagus officinalis]	15.125	7	2	7	2	481	55.3	7.11	17.46	2	0.208	0.144	0.72	0.631101	0.675824	0.916613	5.91	6.2	70.88	213.8	50.1	36.1	16.9	12.19	46.19
1150690166	homocysteine S-methyltransferase 2-like [Asparagus officinalis]	10.706	8	2	10	2	338	36.6	5	17.96	2	2.833	3.07	1.101	0.631101	0.721767	0.973993	2.39	41.51	17.64	42.1	122.7	135.2	3.11	6.89	29
1150713059	probable manganese-transporting ATPase PDR2 [Asparagus officinalis]	7.544	2	2	4	2	1181	131	8.38	1.78	2	2.736	2.523	0.819	0.631101	0.858593	0.918093	18.56	22.84	40.5	50.7	121.3	128	19.69	23.44	40.31
1150749517	stearoyl-[acyl-carrier-protein] 9-desaturase, chloroplastic-like [Asparagus officinalis]	22.292	8	2	10	1	402	45.8	7.01	22.03	2	3.302	5.839	1.768	0.642002	0.471471	0.619289	30.13	59.16	24.13	30	95.1	175	37.05	12.19	45.32
1150745808	cytochrome P450 71A9-like [Asparagus officinalis]	5.545	5	2	4	2	491	55.7	7.84	4.62	2	3.311	3.638	1.182	0.648492	0.668948	0.957611	11.68	38.53	10.41	35.1	125.5	139.3	5.89	25.21	30.91
Q8GRI8	Aquaporin PIP2-5 OS=Oryza sativa subsp. japonica OX=39947 GN=PIP2-5 PE=2 SV=1	8.221	17	2	3	2	283	29.7	7.42	6.41	2	0.274	0.149	1.158	0.652342	0.429655	0.961683	76.89	91.61	33.61	193.8	78.2	28	24.54	61.39	101
1150695480	glycine-rich RNA-binding protein 3, mitochondrial-like [Asparagus officinalis]	16.209	23	2	17	2	158	16.8	8	46.46	2	0.29	0.07	0.253	0.652885	0.103047	0.0174943	27.45	7.23	65.84	221.1	62.9	15.9	3.51	57.05	8.59
1150697460	LOW QUALITY PROTEIN: blue copper protein-like [Asparagus officinalis]	29.376	15	2	19	2	190	19	6.76	64.54	2	0.299	1.563	5.232	0.652885	0.914288	1.73108e-07	16.46	43.83	73.53	104.9	31.3	163.8	37.56	50.01	25.85
O24661	Asparagine synthetase [glutamine-hydrolyzing] OS=Triphysaria versicolor OX=64093 GN=AS PE=2 SV=3	14.239	5	2	12	1	586	65.7	6.62	18.79	2	2.924	11.325	5.883	0.654925	0.212316	0.000154352	5.27	39.82	50.65	16.2	41.4	242.3	41.16	36.38	28.18
1150702072	LOW QUALITY PROTEIN: probable serine/threonine-protein kinase At4g35230 [Asparagus officinalis]	7.034	9	2	6	2	383	43.5	5.41	9.43	2	2.611	4.965	1.544	0.655998	0.316569	0.374037	112.8	27.87	32.82	16	111.6	172.4	66.89	78.9	37.94
1150747676	sorting nexin 1-like [Asparagus officinalis]	7.601	5	2	8	2	405	46.4	7.18	7.32	2	0.208	0.331	1.707	0.66056	0.910432	0.605771	45.21	23.44	28.97	187.7	47.3	65	17.5	40.15	36.25
1150724521	tetraspanin-3 [Asparagus officinalis]	9.358	10	2	8	2	292	32.9	8.81	13.6	2	2.701	3.609	1.057	0.661528	0.642963	0.990161	71.42	49.79	2.94	44.7	120.7	134.6	70.31	17.63	26.4
Q9S827	Succinate dehydrogenase [ubiquinone] iron-sulfur subunit 1, mitochondrial OS=Oryza sativa subsp. japonica OX=39947 GN=SDH2-1 PE=1 SV=1	6.76	7	2	5	1	281	31.1	8.48	2.32	2	0.172	0.385	2.236	0.670431	0.949627	0.356741	69.75	23.44	94.6	188.5	42.1	69.5	23.91	56.25	31.38
Q9SK66	NADH dehydrogenase [ubiquinone] 1 alpha subcomplex subunit 9, mitochondrial OS=Arabidopsis thaliana OX=3702 GN=At2g20360 PE=1 SV=2	7.948	5	2	13	1	402	43.9	9.23	25.16	2	0.214	0.255	1.678	0.676031	0.893591	0.688153	30.81	63.71	74.51	199.2	50	50.9	9.97	27.6	83.09
1150732109	uncharacterized protein LOC109851190 isoform X1 [Asparagus officinalis]	8.478	2	2	17	2	2161	235.8	4.53	19.57	2	2.414	2.946	0.783	0.698089	0.80828	0.916613	48.72	13.41	68.18	48.8	117.7	133.5	11.51	51.23	40.78
1150679905	ubiquitin-conjugating enzyme E2 2 [Asparagus officinalis]	18.114	19	2	23	2	152	17.3	5.58	56.3	2	0.333	0.361	1.09	0.706905	0.865345	0.984408	1.35	2.13	0.55	179.9	57.4	62.8	18.74	14.47	14.79
1150748454	uncharacterized protein LOC109825873 [Asparagus officinalis]	4.578	9	2	32	1	99	11.5	8.4	57.62	2	2.545	2.508	0.985	0.710023	0.857269	0.995088	3.05	23.97	10.73	52.4	122.3	125.3	15.99	13.01	7.91
1150724275	heterogeneous nuclear ribonucleoprotein Q-like [Asparagus officinalis]	9.22	5	2	6	2	528	58.3	5.91	9.71	2	0.198	0.392	1.908	0.712763	0.950938	0.536923	23.76	30.55	5.85	171.8	44.1	84.1	31.31	66.78	18.25
1150689598	glutathione transferase GST 23-like isoform X1 [Asparagus officinalis]	12.132	7	2	8	2	229	26.3	5.58	16.5	2	2.468	8.882	2.961	0.731647	0.162459	0.0148083	2.01	26.28	23.34	23.3	69.5	207.2	15.35	22.43	39.18
1150715455	cytochrome c oxidase subunit 5C [Asparagus officinalis]	9.184	23	2	35	2	64	7.2	7.39	56.1	2	0.352	0.283	0.803	0.731647	0.695828	0.916613	0.34	26.58	26.17	174.4	71.8	53.8	15.06	12.38	36.9
1150708448	bifunctional pinoresinol-lariciresinol reductase 2-like [Asparagus officinalis]	9.597	8	2	4	2	307	35	7.23	6.66	2	0.232	0.382	1.643	0.731647	0.929358	0.715074	21.24	30.01	11	185.9	43.2	71	15.83	7.05	33.41
1150704232	uncharacterized protein LOC109838824 [Asparagus officinalis]	10.326	1	2	12	2	4380	491.1	5.83	7.77	2	2.412	1.779	0.738	0.735816	0.890628	0.782016	10.8	5.65	43.28	68.8	124.8	106.4	17.01	26.64	16.27
1150684764	TPD1 protein homolog 1-like [Asparagus officinalis]	7.495	17	2	18	2	124	13.6	9.22	34.05	2	2.363	1.867	0.728	0.741163	0.889116	0.587703	12.62	12.59	1.05	54.6	128.9	116.5	25.31	42.75	12.83
1150690052	short-chain type dehydrogenase/reductase-like [Asparagus officinalis]	28.703	17	2	32	2	254	26.4	6.77	99.06	2	1.897	3.138	1.799	0.744247	0.317731	0.129656	8.2	1.2	13.04	49.9	94.7	155.4	10.55	37.82	17.72
1150732458	UDP-glucose 4-epimerase GEPI48-like [Asparagus officinalis]	3.624	9	2	5	2	352	38.2	8.16	1.61	2	0.207	0.216	1.127	0.747686	0.841571	0.960679	4.82	24.41	15.6	211.7	40.5	47.7	18.33	22.16	2.61
1150682612	uncharacterized protein LOC109829835 [Asparagus officinalis]	27.483	29	2	25	2	70	8.1	9.99	55.74	2	0.363	0.085	0.396	0.748311	0.0751878	0.0758878	41.83	79.71	38.34	210.5	72.5	16.9	3.81	64.66	70.63
1150700411	uncharacterized protein LOC109837269 [Asparagus officinalis]	11.476	7	2	14	2	385	42.1	4.96	3.81	2	0.238	0.289	1.09	0.748547	0.901572	0.972144	15.25	5.57	14.37	200.1	47.6	52.3	20.68	6.51	8.34
1150706478	uncharacterized protein LOC109839915 [Asparagus officinalis]	12.889	8	2	17	2	406	45.4	6.32	30.4	2	0.24	0.302	1.517	0.748547	0.905257	0.812407	7.21	31.07	62.35	199.2	40.2	60.7	12.57	25.58	31.02
1150746006	putative RNA-binding protein Luc7-like 1 isoform X1 [Asparagus officinalis]	5.785	4	2	3	2	413	48.4	8.57	6.38	2	1.739	1.738	0.934	0.750063	0.794318	0.957433	0.75	9.65	10.35	61.4	123.4	115.3	10.39	14.69	7.52
1150712158	LOW QUALITY PROTEIN: uncharacterized protein At5g39570-like [Asparagus officinalis]	53.272	8	2	60	2	265	29.4	5.26	243.48	2	1.89	2.637	1.273	0.752134	0.44734	0.863256	0.23	5.98	12.69	53.3	100.6	146.2	5.55	11.11	14.28
1150683399	probable signal peptidase complex subunit 1 isoform X1 [Asparagus officinalis]	17.946	12	2	24	2	98	11.2	9.76	58.05	2	0.357	0.325	0.913	0.753257	0.817316	0.972144	0.46	38.29	38.86	178.5	63.5	58	7.98	16.22	48.27
1150736229	NADH dehydrogenase [ubiquinone] iron-sulfur protein 4, mitochondrial-like [Asparagus officinalis]	9.928	22	2	6	2	161	17.7	9.91	12.01	2	0.235	0.134	0.368	0.762417	0.668948		52.69	61.21	0.41	226.6	53.3	20.2	27.55	40.24	70.63
1150749340	selenoprotein F [Asparagus officinalis]	8.503	14	2	8	2	162	18.1	4.67	3.07	2	2.096	3.415	1.63	0.765131	0.674134	0.545401	46.73	24.83	6.41	39.5	102.8	157.7	38.23	23.81	14.8
1150721921	ferritin-4, chloroplastic-like [Asparagus officinalis]	7.729	8	2	12	1	296	33.6	7.23	23.9	2	0.223	0.148	1.497	0.777041	0.704635	0.817923	21.01	46.56	105.14	200.1	44.6	55.3	42.43	11.74	90.5
1150699002	nifU-like protein 4, mitochondrial [Asparagus officinalis]	17.001	11	2	11	2	271	29.5	5.38	16.51	2	0.275	0.217	0.917	0.786762	0.817316	0.990161	17.84	36.05	1.8	201.5	54	44.4	2.06	13.85	31.08
1150733891	eukaryotic translation initiation factor 4G [Asparagus officinalis]	5.552	2	2	2	2	1764	191.3	7.14	0	2	2.098	2.155	1.027	0.79307	0.794318	0.994916	50.06	1.51	37.26	58.6	116.3	125.1	29.19	29.42	26.22
1150691546	L-ascorbate oxidase homolog [Asparagus officinalis]	8.78	4	2	32	1	540	60.7	9.63	84.14	2	1.699	2.939	0.893	0.793378	0.367669	0.918138	14.47	1.21	72.33	46.6	120.5	132.9	26.67	34.47	76.65
1150741341	LOW QUALITY PROTEIN: mannose-1-phosphate guanyltransferase alpha-like [Asparagus officinalis]	5.651	6	2	3	2	415	45.9	6.54	5.15	2	0.274	1.216	4.446	0.793378	0.950938	0.00109724	111.93	30.61	83.76	120.5	33	146.6	9.69	101.23	15.06
1150729600	peroxidase 51-like [Asparagus officinalis]	9.756	8	2	10	2	325	35.1	8.75	26.73	2	2.028	3.102	1.553	0.795404	0.695473	0.647893	6.18	4.03	2.2	49.4	97.3	153.3	9.43	3.11	4.22
1150720372	UDP-glycosyltransferase 91A1-like [Asparagus officinalis]	6.092	5	2	11	2	372	42.2	6.43	11.48	2	2.164	2.837	1.302	0.795672	0.674283	0.859906	16.28	2.68	1.07	51.5	111.4	137.1	12.51	3.77	3.89
1150680724	ATPase family AAA domain-containing protein 3-A-like [Asparagus officinalis]	8.884	4	2	14	1	533	60.6	8.65	24.57	2	0.226	0.161	1.231	0.803841	0.756198	0.921527	59.24	62.4	76.64	217.2	37.1	45.7	31.47	60.4	39.86
1150709545	cinnamoyl-CoA reductase 2-like [Asparagus officinalis]	8.948	8	2	3	1	331	37	6.13	2.62	2	2.271	1.936	0.941	0.803841	0.809119	0.995088	13.99	86.66	11.63	53.5	142.9	103.6	18.69	16.9	51.46
1150698401	polypyrimidine tract-binding protein homolog 3-like isoform X1 [Asparagus officinalis]	18.751	10	2	10	2	444	49.6	6.48	32.16	2	0.266	0.233	0.688	0.803841	0.875739	0.916613	9.68	6.79	25.99	201.5	53.1	45.4	4.5	18.78	22.81
1150712570	flowering time control protein FCA-like [Asparagus officinalis]	5.163	4	2	3	2	598	65.1	8.62	4.04	2	0.245	0.752	3.259	0.803841	0.999557	0.0711106	7.17	15.21	8.46	153.7	31.9	114.5	19.79	31.56	5.78
1150714860	outer envelope pore protein 16-3, chloroplastic/mitochondrial-like [Asparagus officinalis]	9.935	16	2	8	1	158	16.7	9.13	8.02	2	0.282	0.109	0.384	0.804136	0.51419	0.269269	13.81	1.58	13.48	221.6	56.7	21.8	10.74	68.49	41.95
1150698245	sterol 3-beta-glucosyltransferase UGT80A2 [Asparagus officinalis]	16.572	5	2	18	2	593	65.2	7.37	31.46	2	0.289	0.52	1.549	0.804136	0.967513	0.81034	12.77	4.63	16.3	164.8	53	82.2	16.54	16.56	31.4
1150698521	monosaccharide-sensing protein 2-like [Asparagus officinalis]	9.811	4	2	4	2	740	79.6	5.47	4.14	2	0.221	0.305	2.275	0.808792	0.905257		19.97	55.27	82.66	208.3	28	63.7	33.73	79.89	18.81
1150717777	haloacid dehalogenase-like hydrolase domain-containing protein 3 [Asparagus officinalis]	11.179	14	2	12	2	258	28.9	6.9	23.64	2	0.265	0.324	1.284	0.813438	0.913884	0.916613	32.62	27.16	7.31	190.8	47.8	61.4	18.19	62.24	6.42
1150732460	TBC1 domain family member 8B-like isoform X1 [Asparagus officinalis]	13.854	3	2	18	2	794	89.7	4.86	12.87	2	1.975	2.198	1.153	0.813659	0.875739	0.949645	19.66	20.24	5.08	58	114.5	127.5	9.99	34.72	25.21
1150714278	acyl-coenzyme A oxidase 4, peroxisomal-like [Asparagus officinalis]	4.455	5	2	3	1	438	47.9	8.44	4.34	2	0.233	0.251	1.573	0.81391	0.887224	0.781269	49.84	46.96	32.82	211.4	50	38.6	17.61	71.86	77.5
1150743651	dihydrolipoyllysine-residue acetyltransferase component 5 of pyruvate dehydrogenase complex, chloroplastic [Asparagus officinalis]	12.039	13	2	7	2	214	23.1	9.19	10.58	2	0.391	0.51	1.304	0.822576	0.929358	0.916613	13.92	3.49	17.82	157.8	61.7	80.5	7.42	32.47	4.52
1150745355	serine carboxypeptidase-like 18 [Asparagus officinalis]	8.788	7	2	12	2	463	52.3	6.67	30.69	2	2.255	9.425	2.047	0.822724	0.209016	0.219614	95.83	120.7	114.99	27.1	52.7	220.2	41.72	98.52	95.4
1150729251	uncharacterized protein LOC109849939 [Asparagus officinalis]	16.263	28	2	22	2	116	12.1	7.83	42.11	2	0.388	0.098	0.208	0.825417	0.114399	0.000274317	32.98	9.5	25.51	189.1	92.4	18.5	26.98	12.98	11.53
1150727493	alcohol dehydrogenase-like 6 [Asparagus officinalis]	5.587	7	2	2	2	377	40.2	7.5	2.24	2	2.136	2.576	1.022	0.825417	0.794318	0.995088	72.93	6.19	26.77	57	120.2	122.8	62.19	11.84	28.5
1150699308	4-hydroxy-tetrahydrodipicolinate reductase 1, chloroplastic-like [Asparagus officinalis]	9.882	14	2	8	2	333	36.2	6.86	18.86	2	0.274	0.244	0.725	0.825417	0.887807	0.916613	30.76	21.89	3.72	198.7	54.3	47	16.57	63.19	17.56
1150677741	stem-specific protein TSJT1-like [Asparagus officinalis]	9.402	9	2	5	2	256	27.9	6.3	11.55	2	0.372	0.388	1.183	0.825417	0.905118	0.957433	17.58	5.72	17.48	177.4	56.2	66.5	33.2	36.95	62.81
1150739529	proteasome subunit beta type-3 [Asparagus officinalis]	16.718	9	2	9	2	204	22.8	5.43	40.83	2	0.364	0.248	0.496	0.828788	0.794318	0.394135	1.16	32.81	64.11	181.5	73.6	44.9	7.3	17.84	52.84
1150694335	stress-associated endoplasmic reticulum protein 2-like [Asparagus officinalis]	4.882	16	2	17	2	68	7.3	10.76	5.27	2	1.851	2.044	1.364	0.84894	0.875739	0.859906	21.03	1.11	3.36	57	105.6	137.4	22.41	37.94	25.85
1150725505	zerumbone synthase [Asparagus officinalis]	16.137	19	2	2	2	272	28.7	5.77	8.09	2	0.263	0.233	1.696	0.850753	0.866329	0.671452	64.43	78.77	119.6	213	37.3	49.7	36.03	89.17	62.71
1150671046	hexokinase-2, chloroplastic isoform X1 [Asparagus officinalis]	7.86	5	2	5	1	428	46.5	6.02	4.19	2	0.244	0.224	1.489	0.852226	0.875739	0.83438	14.49	63.44	35.36	196.8	44.4	58.8	24.26	9.72	44.7
Q6ZHE5	Putative D-cysteine desulfhydrase 1, mitochondrial OS=Oryza sativa subsp. japonica OX=39947 GN=Os02g0773300 PE=2 SV=2	10.299	6	2	6	1	426	45.5	7.81	9.01	2	0.243	0.288	1.189	0.852226	0.915854	0.946676	0.3	63.73	33.32	195.9	47.5	56.5	12.39	32.24	59.57
1150707989	apoptosis-inducing factor homolog B-like [Asparagus officinalis]	6.953	6	2	14	2	362	39.8	8.32	13.63	2	0.292	0.278	0.851	0.854289	0.901572	0.967644	60.45	6.28	75.35	190.6	54.1	55.3	14.29	66.54	18.15
1150683204	LOW QUALITY PROTEIN: premnaspirodiene oxygenase-like [Asparagus officinalis]	11.709	5	2	8	2	506	57.2	7.55	16.92	2	0.285	0.419	1.446	0.854289	0.950938	0.86845	29.43	5.12	2.5	172.6	59.7	67.7	15.34	26.73	20.45
1150668507	alcohol dehydrogenase 1B [Asparagus officinalis]	9.32	7	2	17	2	381	41.4	8.18	18.07	2	2.068	2.458	1.188	0.854828	0.791143	0.918093	0.37	18.87	10.1	49.8	111.7	138.6	22.68	6.42	15.02
1150715253	uncharacterized protein LOC109843720 [Asparagus officinalis]	10.541	12	2	6	2	207	22.8	7.06	9.44	2	0.288	1.342	4.66	0.859117	0.943658	0.00385999	3.36	76.41	5.04	109.6	43.3	147.1	22.99	17.26	55.1
1150736465	LIM domain-containing protein WLIM1-like [Asparagus officinalis]	11.362	13	2	22	2	184	20.7	8.79	20.7	2	0.393	0.919	2.521	0.859117	0.99043	0.0629639	10.31	10.56	17.65	125.9	49.4	124.6	24.53	36.1	15.8
1150697796	glycolipid transfer protein 1 [Asparagus officinalis]	19.892	11	2	9	2	202	22.3	6.54	24.57	2	0.3	0.173	1.117	0.862875	0.791052	0.967644	2.55	54.3	92.22	221.3	40.5	38.2	27.69	55.73	21.42
1150686157	UDP-glycosyltransferase 87A2-like [Asparagus officinalis]	8.633	6	2	6	2	462	51.9	6.24	8.61	2	0.268	0.378	1.195	0.862875	0.930055	0.936828	16.65	17.95	12.46	169.7	58.6	71.7	15.74	20.02	29.38
1150730941	uncharacterized protein LOC109850628 [Asparagus officinalis]	10.04	40	2	25	2	55	6.5	10.24	58.1	2	0.417	0.382	0.916	0.872815	0.875739	0.97878	15.12	45.67	10.08	173.3	68.1	58.5	13.4	12.23	40.67
1150678071	NADH dehydrogenase [ubiquinone] 1 beta subcomplex subunit 2-like [Asparagus officinalis]	7.566	25	2	22	2	73	8	8.9	56.02	2	0.373	0.341	0.914	0.876807	0.901572	0.98762	12.5	24.75	8.65	190.6	58.7	50.7	24.87	18.74	26.37
1150673648	probable sodium/metabolite cotransporter BASS5, chloroplastic, partial [Asparagus officinalis]	11.217	8	2	9	2	391	41.4	9.57	0	2	1.776	5.116	2.852	0.880319	0.471166	0.0212351	59.08	1.46	80.64	38	67.6	194.4	2.92	66.06	0.47
1150724644	DEAD-box ATP-dependent RNA helicase 8-like [Asparagus officinalis]	6.729	7	2	5	2	494	56.3	8.59	6.16	2	1.773	0.401	0.245	0.880319	0.942726	0.000951617	37.77	32.06	47.4	79.5	177	43.5	47.13	78.02	28.96
1150698119	CLIP-associated protein [Asparagus officinalis]	12.16	2	2	8	2	1446	160.4	7.2	5.65	2	1.778	1.689	0.909	0.880738	0.910432	0.970452	15.04	8.06	5.79	72.1	116.9	111	11.99	13.11	14.06
1150684087	ubiquitin-fold modifier 1 [Asparagus officinalis]	5.236	25	2	6	2	91	9.7	9.61	8	2	0.382	0.531	2.099	0.880738	0.957023	0.356741	39.78	76.38	76.3	165	66.4	68.6	15.19	56.99	89.49
1150689014	uncharacterized protein LOC109832641 [Asparagus officinalis]	11.834	6	2	9	2	554	61.2	4.93	14.63	2	0.284	0.287	1.109	0.884571	0.901572	0.968424	34.53	13.31	52.77	199.7	47.5	52.7	11.24	33.51	49.67
1150735965	non-specific lipid-transfer protein 1-like [Asparagus officinalis]	7.43	29	2	10	2	115	11.5	8.06	23.32	2	1.864	26.376	14.758	0.887105	7.19985e-07	2.75261e-15	6.1	7.48	1.06	13.5	28.4	258.1	26.37	27.9	30.22
1150708329	AMP deaminase isoform X1 [Asparagus officinalis]	6.985	4	2	7	2	538	62.7	7.43	9.28	2	0.425	0.132	0.313	0.887105	0.246258	0.0230215	22.15	25.62	1.16	207.5	70.4	22.1	27.45	23.02	21.83
1150702502	probable methyltransferase PMT26 [Asparagus officinalis]	8.939	4	2	8	2	787	88.8	5.45	7.77	2	2.053	2.279	1.118	0.887105	0.831895	0.984408	17.41	1.07	3.78	57.8	114.4	127.9	3.11	27.67	22.28
1150701595	probable glucan endo-1,3-beta-glucosidase A6 [Asparagus officinalis]	13.704	13	2	7	2	388	43.4	6.99	14.97	2	0.274	0.416	0.819	0.887105	0.949627		50.1	7.99	10.45	177.5	64.9	57.6	56.38	18.43	20.51
1150734779	probable nucleoredoxin 1 [Asparagus officinalis]	8.313	9	2	3	2	521	58.3	4.61	5.07	2	0.264	0.507	1.518	0.887105	0.98003	0.812407	35.07	5.21	44.82	163.6	56.6	79.8	18.23	42.01	17.47
1150678958	SEC12-like protein 2 [Asparagus officinalis]	7.257	7	2	19	2	395	43.8	6.07	2.46	2	1.739	0.927	0.533	0.887719	0.983298	0.402042	3.15	88.27	89.55	81.8	142.3	75.9	14.82	12.16	94.34
1150693141	dynamin-related protein 4C-like [Asparagus officinalis]	4.687	4	2	2	2	663	75	6.58	0	2	0.281	0.3	1.075	0.890056	0.920051	0.982883	18.66	1.1	17.41	188	55.3	56.7	10.86	22.09	31.67
1150716094	calcyclin-binding protein-like [Asparagus officinalis]	8.907	9	2	15	2	222	25.4	7.91	18.92	2	1.729	1.58	0.862	0.890219	0.9214	0.953876	32.34	24.53	8.44	77	124.1	98.9	20.41	10.52	14.5
Q9ZU75	Probable NEDD8-conjugating enzyme Ubc12-like OS=Arabidopsis thaliana OX=3702 GN=RCE2 PE=2 SV=1	13.65	6	2	19	2	185	21.1	8.4	27.1	2	1.843	2.05	1.162	0.892541	0.851576	0.916613	6.33	33.44	9.55	64.2	113.3	122.5	22.48	18.09	4.5
P34887	Peptidyl-prolyl cis-trans isomerase OS=Allium cepa OX=4679 GN=CYP PE=2 SV=1	23.613	36	2	42	2	150	16	8.16	102.47	2	1.857	2.005	1.068	0.892541	0.853382	0.976237	1.62	1.14	10.84	61.9	114.9	123.3	0.36	7.29	5.03
1150726054	mannan endo-1,4-beta-mannosidase 6-like [Asparagus officinalis]	11.51	6	2	2	2	448	51.1	5.74	2.33	2	0.266	0.314	1.036	0.892541	0.9214		54.09	51.48	40.98	180.3	58.8	60.9	33.49	24.14	22.08
1150722480	pathogenesis-related protein 1-like [Asparagus officinalis]	7.832	17	2	6	1	132	13.6	6.29	14.11	2	1.671	7.025	2.919	0.895003	0.168764	0.00752044	65.22	4.85	65.55	34.3	65	200.7	16.82	79.71	37.99
1150672787	nuclear transcription factor Y subunit C-6-like, partial [Asparagus officinalis]	6.119	10	2	4	2	214	23.9	8.43	8.01	2	0.397	0.424	1.174	0.895003	0.9214	0.961683	2.43	15.77	5.81	169.8	59.9	70.3	8.99	9.86	9.74
1150677882	glutamine synthetase nodule isozyme-like [Asparagus officinalis]	15.905	4	2	27	2	356	39.3	6.14	41.9	2	0.283	0.375	1.296	0.895003	0.934163	0.916613	68.74	8.08	11.81	189	46.3	64.7	21.93	55.16	18.74
1150682936	protein TONNEAU 1a-like [Asparagus officinalis]	14.538	12	2	26	2	262	29.6	5.63	48.44	2	1.883	2.003	0.895	0.898021	0.864568	0.970691	7.48	24.81	8.56	57.5	127.9	114.5	15.22	22.12	11.54
1150696014	uncharacterized protein PHLOEM PROTEIN 2-LIKE A4-like [Asparagus officinalis]	7.373	14	2	3	2	161	18.6	8.4	7.82	2	1.6	9.504	9.625	0.900119	0.277281	1.29952e-06	56.74	73.03	101.82	24.6	41.2	234.2	46.02	28.46	103.16
1150689681	ATP-dependent Clp protease proteolytic subunit-related protein 2, chloroplastic [Asparagus officinalis]	9.063	9	2	4	2	290	31.9	9.25	6.17	2	1.691	2.052	1.213	0.900326	0.893591	0.94508	16.47	7.36	8.2	69.8	104	126.2	8.71	19.74	13.21
1150693875	alkaline ceramidase 3 [Asparagus officinalis]	6.246	7	2	5	2	255	29.9	8.7	2.39	2	1.689	1.767	0.872	0.900326	0.905257	0.953735	43.3	16.31	30.55	65.5	125.2	109.2	21.46	25.63	10.6
1150737200	plant UBX domain-containing protein 8 [Asparagus officinalis]	6.969	7	2	2	2	600	65.6	4.81	2.05	2	1.554	1.055	0.679	0.901207	0.965327	0.422979	43.94	86.27	58.12	81.6	130.1	88.3	4.32	34.74	80.06
1150726501	gamma-glutamyltranspeptidase 3-like isoform X1 [Asparagus officinalis]	8.867	6	2	2	2	473	51.9	6.77	4.75	2	0.294	0.283	0.964	0.903185	0.901273	0.996633	36.84	1.27	28.49	175.9	63.7	60.4	21.79	28.48	11.64
1150712230	probable 3-hydroxyisobutyrate dehydrogenase-like 1, mitochondrial [Asparagus officinalis]	4.676	9	2	39	2	198	21.2	8.27	79.61	2	1.513	1.301	0.91	0.903396	0.937183	0.948133	8.17	23.16	17.75	77	116.8	106.3	14.57	0.18	17.59
1150717891	LOW QUALITY PROTEIN: putative UDP-rhamnose:rhamnosyltransferase 1 [Asparagus officinalis]	7.923	5	2	12	2	468	53	5.97	10.74	2	1.623	1.125	0.869	0.904703	0.966238	0.916613	58.41	37.58	3.88	80.1	129.7	90.2	12.97	40.37	24.36
1150708623	chaperone protein dnaJ 15 [Asparagus officinalis]	7.387	6	2	5	2	413	45.5	6.04	4.63	2	1.915	1.947	1.184	0.905018	0.864568	0.958103	10.11	24.34	9.53	61.9	117.7	120.5	35.52	19.36	18.94
1150746180	tobamovirus multiplication protein 2A [Asparagus officinalis]	12.604	10	2	19	2	281	31	5.3	43.5	2	0.346	0.481	1.061	0.912556	0.962288	0.995088	39.38	45.95	5.63	154.9	69.4	75.7	18.85	44.4	32.04
1150684332	isopentenyl-diphosphate Delta-isomerase I [Asparagus officinalis]	18.295	10	2	25	2	226	26.4	5.27	133.42	2	1.807	1.556	0.723	0.912974	0.905257	0.705147	7.94	32.09	45.88	76.4	130.6	93	23.65	30.15	31.34
1150674992	protein WVD2-like 4 [Asparagus officinalis]	14.967	8	2	10	2	462	49.1	9.44	24.31	2	0.318	0.3	1.19	0.912974	0.905257	0.939645	26.45	30.45	2.23	185.9	58.3	55.8	24.61	45.57	30.36
1150708539	uncharacterized protein LOC109840638 [Asparagus officinalis]	12.483	4	2	10	2	807	91.1	6.58	17.33	2	0.293	0.255	1.355	0.913407	0.905257	0.916613	1.44	4.06	12.8	197	46.8	56.2	16	17.63	17.5
1150725102	uncharacterized protein LOC109848332 [Asparagus officinalis]	10.641	6	2	16	2	697	78.3	5.26	18.71	2	1.603	2.032	1.228	0.916553	0.899913	0.940708	3.15	4.57	8.03	65.6	105.2	129.2	30	16.76	26.54
1150691751	calcium-dependent protein kinase 2-like [Asparagus officinalis]	22.075	5	2	25	2	536	60.2	6.57	47.71	2	1.745	2.573	1.399	0.917677	0.749839	0.573476	17.7	7.56	0.1	55.5	101.9	142.6	4.1	16.7	4.59
Q9FX21	Dolichyl-diphosphooligosaccharide--protein glycosyltransferase subunit STT3B OS=Arabidopsis thaliana OX=3702 GN=STT3B PE=2 SV=1	18.838	3	2	40	1	735	82.9	8.92	74.07	2	0.353	0.363	1.031	0.917842	0.9214	0.995088	3.03	75.61	59.59	182.1	62.9	54.9	17.63	19.08	77.8
1150724764	uncharacterized protein LOC109848214 [Asparagus officinalis]	6.938	9	2	8	2	270	31.7	5.11	14.42	2	0.291	0.155	0.534	0.922885	0.748705	0.671457	15.9	1.27	19.22	207	60.6	32.4	1.22	12.22	47.75
1150670214	polygalacturonase inhibitor-like [Asparagus officinalis]	12.289	7	2	12	2	331	36.2	9.17	27.33	2	0.42	0.209	0.635	0.924734	0.794318	0.786185	9.25	8.98	18.96	183	76.8	40.2	8.61	23.19	23.78
1150730137	uncharacterized protein LOC109850290 [Asparagus officinalis]	7.889	10	2	4	2	189	21.7	10.17	1.94	2	1.58	1.41	0.99	0.924734	0.934163	0.995088	8.26	18.76	34.29	75.9	110.2	114	14.84	21	15.26
Q40784	Putative glucose-6-phosphate 1-epimerase OS=Cenchrus ciliaris OX=35872 PE=2 SV=1	7.071	7	2	28	1	329	36.4	6.8	49.74	2	1.82	2.472	1.171	0.925624	0.794318	0.962595	19.07	35.08	6.6	53.5	116.3	130.1	24.4	24.74	18.64
1150728504	ubiquitin-conjugating enzyme E2 variant 1D-like isoform X1 [Asparagus officinalis]	4.8	15	2	20	1	162	18.4	5.11	35.57	2	1.434	1.729	1.389	0.925948	0.875739	0.909623	15.69	28.31	5	72.8	104.4	122.7	24.51	32.19	29.78
1150698779	ras-related protein RHN1-like [Asparagus officinalis]	8.021	10	2	18	1	200	22.1	6.21	26.05	2	1.652	1.431	0.866	0.925948	0.910432	0.980082	23.18	4.02	12.17	73.5	121.4	105.1	11.45	34.07	24.81
1150689309	uncharacterized protein LOC109832712 [Asparagus officinalis]	11.025	7	2	18	1	307	32.5	8.84	36.11	2	0.297	0.349	1.173	0.931074	0.934163	0.948067	13.69	1.64	103.88	182.3	54.2	63.5	9.32	26.85	54.14
1150690824	hemoglobin-2-like [Asparagus officinalis]	23.105	15	2	43	2	162	18	8.12	137.89	2	1.378	2.33	1.965	0.931663	0.567624	0.0585718	7.14	24.03	2.29	66.7	77.9	155.4	42.76	50.12	23.7
1150672320	nucleolin 1 [Asparagus officinalis]	8.301	3	2	4	2	700	77.5	9.25	2.07	2	1.408	2.375	1.468	0.931663	0.739352	0.856289	22.06	7.09	22.4	71.7	97.3	131	24.49	6.23	34.94
1150714144	annexin D4-like [Asparagus officinalis]	10.452	8	2	12	2	321	36.5	7.3	33.47	2	1.722	3.575	2.603	0.931663	0.744953	0.189852	10.26	6.7	0.87	50.9	70	179.1	31.81	28	16.56
1150741499	serine/threonine-protein phosphatase 6 regulatory subunit 3-like isoform X1 [Asparagus officinalis]	10.002	3	2	15	2	781	87.2	4.61	27.23	2	0.325	0.204	0.628	0.931663	0.829313	0.833308	24.64	73.24	41.68	200.2	61.3	38.5	4.38	23.41	95.3
1150744211	uncharacterized protein LOC109824166 [Asparagus officinalis]	7.442	2	2	6	2	1646	176.6	5.3	2.01	2	0.316	0.281	0.862	0.931663	0.910432	0.985706	16.65	14.47	4.68	188.6	58.9	52.5	5.54	8.76	10.21
1150679899	single-stranded DNA-binding protein WHY1, chloroplastic-like isoform X1 [Asparagus officinalis]	6.745	12	2	7	2	282	31	9.63	3.3	2	0.345	0.363	1.11	0.931663	0.92641	0.965589	16.68	37.53	23.52	179.3	61.9	58.8	8.28	12.43	29.56
1150739402	LOW QUALITY PROTEIN: probable ubiquitin conjugation factor E4 [Asparagus officinalis]	12.897	3	2	7	2	1026	115.8	5.68	19.87	2	0.347	0.509	1.481	0.931663	0.96976	0.843352	10.05	11.61	51.16	168.9	45.1	85.9	14.74	52.96	36.26
1150693285	thioredoxin H1 [Asparagus officinalis]	9.116	26	2	8	2	110	12.3	5.92	17.35	2	1.508	1.627	1.097	0.933392	0.919199	0.993399	13.73	11.38	23.52	77.5	106.1	116.4	32.9	22.52	40.47
1150670270	alpha-N-acetylglucosaminidase isoform X1 [Asparagus officinalis]	7.01	3	2	21	2	811	92.1	6.9	10.17	2	1.666	1.553	0.894	0.935004	0.905257	0.957433	6.31	12.13	2.02	71.3	118.1	110.7	10.82	5.72	3.64
1150715447	chaperone protein dnaJ 10-like [Asparagus officinalis]	8.154	12	2	3	2	396	44.1	5.9	4.44	2	0.314	3.215	6.737	0.937836	0.764244	0.00022121	2.56	47.58	40.62	79.6	28.5	191.9	40.56	14.5	23.35
1150695214	uncharacterized protein LOC109834936 [Asparagus officinalis]	15.789	3	2	18	2	514	57.2	6.73	44.58	2	1.503	1.208	0.804	0.937836	0.961383	0.916613	0.99	21.57	26.4	80.9	121.5	97.6	18.22	16.55	37.38
1150747450	U2 small nuclear ribonucleoprotein A' [Asparagus officinalis]	7.387	9	2	4	2	295	33.1	5.19	6.55	2	0.361	0.265	0.567	0.939943	0.893591	0.717037	38.84	6.72	75.38	184.7	66.9	48.4	0.68	36.42	51.16
Q9STZ3	Phosphoinositide phospholipase C 8 OS=Arabidopsis thaliana OX=3702 GN=PLC8 PE=2 SV=1	3.76	2	2	27	2	531	61	8.47	51.79	2	1.353	2.304	1.844	0.940913	0.584747	0.125482	0.62	0.53	11.76	67.3	77.6	155.1	17.25	21.19	13.45
1150723446	LOW QUALITY PROTEIN: conserved oligomeric Golgi complex subunit 1 [Asparagus officinalis]	4.924	2	2	5	2	1080	120.8	7.12	0	2	1.333	2.546	1.285	0.940913	0.67655	0.916613	9.97	68.19	20.62	51.6	117.1	131.3	39.06	39.35	27.59
1150736265	probable inactive purple acid phosphatase 1 [Asparagus officinalis]	6.675	4	2	12	2	613	68.9	7.14	11.08	2	1.417	2.817	1.672	0.940913	0.742844	0.506075	51.1	23.56	17.17	47.9	75	177.1	35.82	78.36	25.34
1150732947	bifunctional UDP-glucose 4-epimerase and UDP-xylose 4-epimerase 1-like [Asparagus officinalis]	15.549	7	2	25	2	361	40.3	5.9	43.01	2	1.683	2.273	1.351	0.940913	0.809119	0.697203	2.23	17.67	15.67	60.9	102.5	136.6	22.1	18.94	4.72
Q9LHA4	V-type proton ATPase subunit d2 OS=Arabidopsis thaliana OX=3702 GN=VHA-d2 PE=2 SV=1	13.595	10	2	7	2	351	40.8	5.11	18.61	2	0.339	0.205	0.532	0.940913	0.817316	0.683737	9.04	45.27	32.22	194.9	65.3	39.9	12.62	16.07	24.24
1150680576	bifunctional phosphatase IMPL2, chloroplastic-like [Asparagus officinalis]	16.375	18	2	10	2	271	29.9	5.06	25.87	2	0.332	0.199	1.262	0.940913	0.817316	0.918093	97.97	77.92	34.35	176.1	58.5	65.5	39.06	77.72	64.76
1150719774	early nodulin-93-like [Asparagus officinalis]	4.249	15	2	2	2	114	12.3	10.11	3.98	2	0.498	0.364	0.732	0.940913	0.865345	0.874657	6.94	42.28	21.01	161.4	80	58.6	15.44	27.41	49.55
1150714851	uncharacterized protein LOC109843543 [Asparagus officinalis]	19.222	12	2	22	2	295	30.6	4.73	43.31	2	1.493	1.984	1.058	0.940913	0.889116	0.988297	6.38	4.35	13.17	76.3	113.9	109.8	36.07	44.98	34.42
1150694331	nuclear pore complex protein NUP93A-like [Asparagus officinalis]	6.514	3	2	2	2	860	95.4	6.99	4.69	2	0.361	0.251	0.697	0.940913	0.893591	0.916613	10.06	26.09	17.19	192.7	67.4	39.9	22.63	16.52	22.63
1150670930	endoplasmic reticulum-Golgi intermediate compartment protein 3-like isoform X1 [Asparagus officinalis]	3.73	5	2	5	2	385	43.4	6.86	1.63	2	1.543	1.779	1.212	0.940913	0.893591	0.916613	8.73	7.55	1.63	73.7	111.6	114.6	12.37	14.1	10.92
1150744533	serine carboxypeptidase-like 42 [Asparagus officinalis]	6.679	4	2	5	2	471	52.7	6.54	5.51	2	1.681	1.81	1.077	0.940913	0.893591	0.98762	12.46	2.01	15.79	65.6	114	120.4	14.32	14.05	16.59
1150671307	LOW QUALITY PROTEIN: subtilisin-like protease SBT1.3 [Asparagus officinalis]	9.83	3	2	3	2	744	79.2	8.6	6.79	2	1.533	1.328	0.903	0.940913	0.912644	0.990161	34.77	6.42	40	89.3	116.8	93.9	23.2	26.54	37.64
1150689152	LOW QUALITY PROTEIN: probable splicing factor 3A subunit 1 [Asparagus officinalis]	5.935	4	2	9	2	792	87.8	5.06	16.99	2	1.417	1.69	1.229	0.940913	0.913227	0.932464	1.84	6.47	4.44	72.9	103.3	123.8	15.93	2.73	6.9
1150723652	malate dehydrogenase, glyoxysomal-like [Asparagus officinalis]	18.416	7	2	18	2	433	46.9	5.25	43.12	2	0.486	0.424	0.843	0.940913	0.919199	0.924157	1.02	24.44	24.74	155.8	78.3	66	5.94	5.64	13.58
1150678369	uncharacterized protein LOC109822250 isoform X1 [Asparagus officinalis]	9.729	16	2	19	2	198	21.3	6.02	31.43	2	1.538	1.454	0.875	0.940913	0.919199	0.95889	16.76	4.8	25.64	76.6	112	111.4	2.94	12.14	16.72
1150728086	uncharacterized protein LOC109849438 [Asparagus officinalis]	6.148	17	2	2	2	221	25	9.1	1.78	2	0.323	0.312	0.813	0.940913	0.919199	0.961683	23.57	55.49	42.27	181.7	61.6	56.7	5.72	40.73	38.48
1150700876	LOW QUALITY PROTEIN: uncharacterized protein LOC109837428 [Asparagus officinalis]	10.913	2	2	7	2	1623	176.7	7.91	10.02	2	1.437	1.51	1.051	0.940913	0.927311	0.995088	6.3	7.87	1.5	86.7	103.4	109.8	16.95	19.81	20.73
1150690618	soluble inorganic pyrophosphatase 6, chloroplastic-like [Asparagus officinalis]	19.28	13	2	13	1	277	31.1	9.01	16.86	2	1.462	1.486	1.033	0.940913	0.929358	0.995088	13.9	20.81	2.46	72.4	110.5	117.1	16.46	35.23	34.54
Q9SXS7	Bifunctional L-3-cyanoalanine synthase/cysteine synthase D2 OS=Arabidopsis thaliana OX=3702 GN=CYSD2 PE=1 SV=1	10.948	9	2	13	1	323	34.3	5.59	16.78	2	0.336	0.341	1.015	0.940913	0.934058	0.990161	0.5	65.25	76.9	185.1	63.9	51	12.75	18.7	63.01
1150687722	uncharacterized protein LOC109831943 [Asparagus officinalis]	7.061	20	2	9	2	186	20.3	5.29	0	2	0.348	0.391	1.092	0.940913	0.934163	0.974307	2.63	1.97	6.82	173.1	59.3	67.7	19.75	21.65	26.72
1150692273	uclacyanin 1-like [Asparagus officinalis]	8.398	10	2	10	2	208	23.5	10.62	27.46	2	0.496	0.481	0.97	0.940913	0.934163	0.995088	7.49	13.62	5.83	117.9	84.1	98	40.06	28.93	32.23
1150744046	eukaryotic translation initiation factor 4E-1-like [Asparagus officinalis]	16.849	13	2	6	2	233	26.7	5.06	11.66	2	1.441	1.385	0.975	0.940913	0.937322	0.995088	7.3	21.77	2.07	82.1	110.3	107.5	14.48	11.86	29.16
1150699584	succinate dehydrogenase subunit 7, mitochondrial-like [Asparagus officinalis]	18.146	15	2	53	2	88	9.6	10.29	146	2	1.301	1.119	0.905	0.940913	0.943784	0.924379	19.18	1.16	29.33	86.3	112.2	101.6	4.56	15.59	4.34
1150719873	uncharacterized protein LOC109845617 [Asparagus officinalis]	13.682	50	2	13	2	66	8.1	9.48	5.5	2	1.428	1.169	0.781	0.940913	0.962593	0.916613	8.28	4.5	5.08	84.7	116.3	99	3.06	10.72	6.89
Q94B38	Glucose-6-phosphate/phosphate translocator 2, chloroplastic OS=Arabidopsis thaliana OX=3702 GN=GPT2 PE=2 SV=2	10.257	6	2	17	2	388	42.7	9.61	36.42	2	0.488	0.834	1.268	0.940913	0.999557	0.916613	7.73	12.56	12.57	121.1	78.9	100	22.84	16.73	7.92
1150680920	protein decapping 5-like isoform X1 [Asparagus officinalis]	9.484	4	2	8	2	604	64.8	8.1	16.55	2	1.397	1.252	0.897	0.944295	0.949627	0.960679	5.7	9.07	16.16	79.6	115.4	105.1	3.27	6.14	8.75
1150690130	uncharacterized protein LOC109832976 [Asparagus officinalis]	18.632	25	2	33	2	145	16.1	6.39	59.79	2	1.582	1.502	0.972	0.945278	0.919199	0.995088	6.71	1.82	10.27	78.3	105.5	116.2	9.13	12.9	7.6
1150716292	LOW QUALITY PROTEIN: ultraviolet-B receptor UVR8-like [Asparagus officinalis]	7.255	7	2	6	2	412	44.5	6.35	11.55	2	1.407	1.127	0.813	0.945828	0.965327	0.916613	2.33	40.01	24.66	83.4	126.1	90.5	15.29	14.54	19.96
1150683004	monothiol glutaredoxin-S12, chloroplastic isoform X2 [Asparagus officinalis]	6.398	7	2	9	2	296	31.9	8.88	16.37	2	0.468	0.239	0.579	0.94603	0.843608	0.657599	17.38	17.62	8.29	171.2	88	40.8	6.18	15.57	38.86
Q9S9W2	Short-chain dehydrogenase/reductase SDRA OS=Arabidopsis thaliana OX=3702 GN=SDRA PE=1 SV=1	6.256	8	2	6	2	254	26.7	8.38	5.67	2	0.42	0.208	0.778	0.947558	0.80828	0.918093	16.95	53.9	98.13	184.5	77.5	38	10.73	68.06	34.78
P37891	Serine carboxypeptidase 3 OS=Oryza sativa subsp. japonica OX=39947 GN=CBP3 PE=2 SV=1	5.757	6	2	5	1	500	55.4	6.14	7.08	2	0.373	0.167	0.4	0.947558	0.811786	0.202521	7.95	26.89	80.56	193.1	72	34.9	9.87	55.19	49.25
1150735107	acyl-protein thioesterase 2-like [Asparagus officinalis]	4.009	6	2	4	2	257	27.7	7.68	3.73	2	0.369	0.237	0.561	0.947558	0.851576		78.57	21.83	52.33	187.9	69.6	42.6	19.6	61.16	6.67
1150697089	1-aminocyclopropane-1-carboxylate oxidase homolog 1-like [Asparagus officinalis]	15.221	20	2	15	2	172	19.2	7.27	26.53	2	0.372	0.216	0.779	0.948267	0.843397	0.949144	54.46	42.12	2.95	194.8	61.2	44	54.61	12.88	19.51
1150700205	LOW QUALITY PROTEIN: serine carboxypeptidase-like [Asparagus officinalis]	4.394	4	2	3	1	495	55.2	5.59	3.63	2	0.419	0.225	0.722	0.948496	0.829668	0.916613	7.93	37.8	27.11	182	76.2	41.8	1.21	77.75	76.3
1150681257	signal peptidase complex subunit 3A-like [Asparagus officinalis]	13.916	22	2	26	2	167	19.1	9.41	46.45	2	1.474	1.39	0.878	0.948496	0.92384	0.954891	17.45	5.97	31.74	91.4	114.7	93.8	19.94	13.07	19.6
1150718111	UDP-N-acetylglucosamine diphosphorylase 1-like isoform X1 [Asparagus officinalis]	7.619	5	2	10	2	497	55.1	5.97	10.89	2	0.386	0.553	1.435	0.948496	0.977884	0.848884	74.44	18.24	101.94	154.7	59.7	85.6	12.66	55.94	38.88
1150687972	pathogenesis-related protein 1-like [Asparagus officinalis]	9.126	7	2	12	2	162	18.7	8.21	26.6	2	1.312	6.247	6.894	0.948801	0.146923	0.000230926	54.7	12.78	42.71	31.4	41.3	227.3	18.35	46.91	74.4
1150672373	LOW QUALITY PROTEIN: golgin candidate 6-like [Asparagus officinalis]	12.7	4	2	12	2	894	98.3	4.82	14.96	2	1.335	1.408	1.135	0.948801	0.934163	0.973629	10.49	23.22	19.38	80.7	117.3	102	15.03	18.11	32.16
1150728104	60S acidic ribosomal protein P1-like [Asparagus officinalis]	12.958	18	2	5	2	117	11.8	4.32	2.83	2	0.434	0.649	2.133	0.948801	0.983298	0.314969	9.78	69.09	33.61	130.9	60.1	109	15.28	47.34	49.11
1150724748	peroxisomal (S)-2-hydroxy-acid oxidase GLO4-like [Asparagus officinalis]	12.855	5	2	5	2	364	39.6	8.05	17.01	2	0.507	0.119	0.35	0.949282	0.503355	0.106644	12.02	83.2	42.85	183.8	94.2	22	10.45	25.66	58.41
1150719582	uncharacterized protein LOC109845504 [Asparagus officinalis]	24.917	48	2	17	2	100	10.9	9.57	69.76	2	0.425	0.128	0.31	0.949282	0.589496	0.0663769	38.77	4.34	53.45	182.4	95.9	21.7	15.2	39.62	23.3
1150718693	binding partner of ACD11 1-like [Asparagus officinalis]	6.702	7	2	18	1	278	29.9	5.14	36.82	2	1.245	1.976	1.492	0.949282	0.807193	0.836712	2.08	8.85	11.66	70.2	99.2	130.5	76.15	24.85	35.86
1150694029	LOW QUALITY PROTEIN: signal recognition particle subunit SRP68-like [Asparagus officinalis]	6.72	4	2	10	2	579	66.2	9.1	5.18	2	0.437	0.206	0.487	0.949282	0.844294	0.446467	4.93	18.45	52.12	183.6	78.6	37.9	21.37	16.49	92.43
O49901	Zeta-carotene desaturase, chloroplastic/chromoplastic OS=Narcissus pseudonarcissus OX=39639 GN=ZDS1 PE=2 SV=1	7.451	4	2	15	2	574	63.5	7.68	21.75	2	0.429	0.227	0.745	0.949282	0.864568	0.921527	30.49	5.42	24.22	181.3	77.7	41	1.52	29.1	49.9
1150701869	V-type proton ATPase subunit a3-like isoform X1 [Asparagus officinalis]	10.894	3	2	14	1	790	90.1	6.16	21.05	2	1.263	1.92	1.52	0.949282	0.875739	0.801183	9.5	10.08	18.4	77.9	81.4	140.8	10.89	24.23	43.26
Q2QMX9	Calcium-transporting ATPase 10, plasma membrane-type OS=Oryza sativa subsp. japonica OX=39947 GN=ACA10 PE=2 SV=1	6.368	2	2	2	2	1020	111.1	6.2	2.19	2	0.425	0.231	0.708	0.949282	0.875739	0.916613	44.74	13.17	24.92	178.1	75.6	46.3	37.97	9.78	30.21
1150693909	L-galactose dehydrogenase [Asparagus officinalis]	11.765	13	2	7	2	322	34.8	5.52	10.41	2	0.445	2.231	4.156	0.949282	0.887807	0.00696098	25.03	43.07	30.52	57.4	47	195.5	50.7	68.6	31.21
1150691739	protein DETOXIFICATION 40-like [Asparagus officinalis]	9.126	5	2	15	2	441	47.6	8.07	40.5	2	0.598	0.422	0.706	0.949282	0.893591	0.670268	28.06	99.09	73.1	138.9	94.4	66.7	7.77	39.04	90.81
1150735197	NASP-related protein sim3 [Asparagus officinalis]	13.502	5	2	10	2	473	50.5	4.46	17.14	2	0.403	0.281	0.68	0.949282	0.893591	0.876284	3.96	83.95	74.15	178.9	72.1	49.1	3.02	4.48	69.25
1150729155	uncharacterized protein LOC109849903 [Asparagus officinalis]	12.61	6	2	16	2	410	44.5	6.47	38.59	2	0.508	0.324	0.893	0.949282	0.901572	0.961683	0.52	19.09	44.39	162.7	80.1	57.3	6.1	13.25	45.97
1150704168	beta-glucosidase 4-like [Asparagus officinalis]	6.198	14	2	22	1	166	18.7	4.74	25.99	2	1.35	1.38	0.902	0.949282	0.901572	0.98762	9.91	43.05	26.2	67	134.8	98.2	24.94	25.31	15.29
1150669970	(+)-neomenthol dehydrogenase-like [Asparagus officinalis]	9.675	8	2	5	2	306	33.6	6.06	5.76	2	0.376	0.298	0.729	0.949282	0.903581	0.916613	4.68	18	19.75	181.8	68.4	49.8	8.58	4.33	15.77
1150701597	probable UDP-arabinopyranose mutase 5 [Asparagus officinalis]	11.945	7	2	26	2	349	39.3	6.44	56.24	2	0.529	0.323	0.611	0.949282	0.905257	0.664845	6.45	49.3	41.07	158.8	90.6	50.6	7.43	18.83	95.89
1150690648	uncharacterized protein DDB_G0290685-like [Asparagus officinalis]	7.913	11	2	10	2	474	52.3	4.36	7.34	2	1.289	1.901	1.656	0.949282	0.905257	0.67907	10.42	18.3	32.12	72	92.8	135.2	22.83	39.11	21.21
1150734641	probable nucleoredoxin 1 [Asparagus officinalis]	9.234	6	2	3	2	569	64	5.12	1.76	2	1.226	1.853	1.644	0.949282	0.905257	0.753392	28.27	13.02	14.23	79.1	87.6	133.3	17.69	13.39	17.89
1150699867	nucleolin-like isoform X1 [Asparagus officinalis]	9.824	3	2	5	2	724	80.6	5.39	11.51	2	1.399	1.503	1.022	0.949282	0.913884	0.995088	1.1	14.28	8.85	81	112.4	106.7	16.96	9.91	8.68
1150668770	glutathione S-transferase 3-like [Asparagus officinalis]	13.392	13	2	3	2	214	23.5	6.2	9.51	2	0.421	1.566	3.069	0.949282	0.92384	0.0530634	3.11	22.57	26.4	99	46	155	7.62	15.72	19
1150693601	uncharacterized protein LOC109834183 [Asparagus officinalis]	6.777	7	2	11	2	456	50.1	5.96	6.41	2	1.209	1.457	1.077	0.949282	0.92384	0.97878	0.37	21.03	5.59	75.7	110.1	114.2	15.93	10.83	4.57
1150738042	probable tocopherol cyclase, chloroplastic [Asparagus officinalis]	4.87	7	2	16	2	414	46.7	7.91	21.38	2	1.423	1.456	1.042	0.949282	0.92641	0.989647	2.78	7.04	0.11	74	111.7	114.4	7.85	6.4	4.05
1150684962	14 kDa zinc-binding protein [Asparagus officinalis]	11.612	20	2	21	2	133	14.5	7.05	47.73	2	1.358	1.351	0.947	0.949282	0.927311	0.98702	7.66	17.18	11.2	80.7	110.2	109.1	7.79	15.43	10.38
1150698327	uncharacterized protein LOC109836526 [Asparagus officinalis]	9.519	7	2	7	2	517	59.7	5.68	12.09	2	0.389	0.373	1.298	0.949282	0.927637	0.916613	33.36	38.82	0.6	192.6	61.7	45.8	24.65	38.24	49.55
1150672943	LOW QUALITY PROTEIN: uncharacterized protein LOC109826431 [Asparagus officinalis]	9.807	7	2	4	2	824	87.9	5.44	1.72	2	0.398	0.376	1.381	0.949282	0.931854	0.916613	32.95	11.69	3.51	170.8	64.9	64.3	3.84	33.57	21.56
1150691265	squalene synthase-like [Asparagus officinalis]	36.316	4	2	73	2	403	45.8	7.69	252.07	2	1.226	1.263	1.114	0.949282	0.931854	0.952824	21.46	22.14	28.51	86.8	106.5	106.6	13.29	6.1	34.68
1150734491	probable transcription factor At4g00390 [Asparagus officinalis]	5.801	8	2	3	2	375	40.9	5.03	0	2	1.234	0.4	0.325	0.949282	0.934163	0.0908405	0.2	47.17	47.44	111.9	142	46.1	7.85	10.5	104.1
1150676477	AP-1 complex subunit mu-2-like [Asparagus officinalis]	9.822	7	2	12	1	428	49.1	6.9	22.77	2	0.36	1.191	2.498	0.949282	0.934163	0.196575	50.85	22.17	88.96	119.8	27.4	152.8	25.87	64.6	66.1
1150719770	uncharacterized protein LOC109845574 [Asparagus officinalis]	13.623	8	2	11	2	503	56.6	5.12	23.56	2	0.413	0.392	0.8	0.949282	0.934163	0.933925	52.02	37.36	23.34	170.6	73	56.3	26.56	33.45	42.32
1150715168	uncharacterized protein At2g39795, mitochondrial-like [Asparagus officinalis]	28.794	16	2	33	2	264	29.6	4.61	120.08	2	0.565	0.531	0.94	0.949282	0.934163	0.988297	4.3	3.8	0.48	142	81.3	76.7	13.47	22.24	21.58
1150713049	aldo-keto reductase family 4 member C9-like [Asparagus officinalis]	17.697	14	2	17	2	310	33.9	6.35	45.72	2	0.523	0.433	0.953	0.949282	0.934163	0.989647	22.55	21.38	2.08	159.7	86.3	54	14.59	46.41	64.86
1150683706	60S ribosomal protein L38-like [Asparagus officinalis]	17.093	36	2	54	2	69	8	9.88	135	2	0.574	0.558	0.972	0.949282	0.937322	0.990161	31.89	52.6	13.21	140.7	80.8	78.6	4.39	26.41	39.95
Q9SMN1	Gamma carbonic anhydrase-like 2, mitochondrial OS=Arabidopsis thaliana OX=3702 GN=GAMMACAL2 PE=1 SV=1	11.866	9	2	12	1	256	27.9	8.68	24.83	2	1.235	1.416	0.974	0.949282	0.937322	0.993399	40.35	33.45	14.39	91.8	105.5	102.8	27.08	15.68	15.05
1150735166	bifunctional 3-dehydroquinate dehydratase/shikimate dehydrogenase, chloroplastic-like isoform X1 [Asparagus officinalis]	7.202	4	2	12	1	520	56.4	6.8	28.83	2	0.384	0.375	1.24	0.949282	0.94059	0.921527	62.01	85.13	17.35	157.4	83.6	59	36.28	36.36	36.12
1150738673	ATP phosphoribosyltransferase 1, chloroplastic-like [Asparagus officinalis]	11.193	9	2	6	2	334	36.7	5.95	16.78	2	1.278	1.307	1.067	0.949282	0.941117	0.984408	2.87	3	1.36	82.1	104.9	113	8.88	12.41	8.89
1150669410	pentatricopeptide repeat-containing protein At1g80270, mitochondrial-like [Asparagus officinalis]	7.041	4	2	4	2	613	69.1	7.85	6.21	2	0.405	0.413	1.021	0.949282	0.942726	0.990161	44.24	61.7	74.81	165.7	65.9	68.4	22.98	32.58	66.03
1150723977	keratin, type II cytoskeletal 1-like [Asparagus officinalis]	17.093	10	2	45	2	301	33.3	9.57	81.57	2	1.208	1.123	0.968	0.949282	0.942726	0.990161	0.45	11.6	5.96	95.5	102.1	102.4	15.97	18.11	13.47
1150711666	oligouridylate-binding protein 1B-like isoform X1 [Asparagus officinalis]	12.228	5	2	18	1	424	46.2	7.53	36.52	2	1.286	1.119	0.866	0.949282	0.944055	0.967644	5.54	0.67	1.78	88.6	110.4	101.1	23.52	17.57	23.72
1150694599	dicarboxylate transporter 2, chloroplastic-like [Asparagus officinalis]	9.181	9	2	16	2	298	31.6	9.88	27.93	2	1.174	1.266	1.078	0.949282	0.948868	0.984408	3.93	14.09	17.55	90.2	100.2	109.7	5.76	8.85	18.36
P49689	40S ribosomal protein S30 OS=Arabidopsis thaliana OX=3702 GN=RPS30A PE=3 SV=3	14.382	18	2	49	2	62	6.9	12.23	115.08	2	1.153	0.575	0.545	0.949282	0.949627	0.0884247	42.24	45.26	3.66	117.8	116.9	65.3	24.71	25.19	20.52
1150696436	ATP-dependent Clp protease proteolytic subunit-related protein 1, chloroplastic [Asparagus officinalis]	11.038	6	2	23	2	387	42.2	8.87	69.65	2	1.34	1.184	0.884	0.949282	0.953788	0.952824	3.77	13.69	33.18	80.5	115.2	104.3	6.68	5.97	21.09
1150710534	probable protein phosphatase 2C 59 [Asparagus officinalis]	8.038	10	2	3	2	247	26.8	4.93	4.52	2	1.157	1.241	1.073	0.949282	0.960476	0.995088	13.71	14.84	1.03	92.4	103.9	103.7	16.16	5.52	6
O81644	Villin-2 OS=Arabidopsis thaliana OX=3702 GN=VLN2 PE=1 SV=2	8.26	2	2	12	1	976	107.8	5.29	27.34	2	1.161	1.202	1.373	0.949282	0.961383	0.916613	2.8	10.36	41.93	93.8	93.4	112.8	10.73	16.11	24.23
P52032	Phospholipid hydroperoxide glutathione peroxidase 1, chloroplastic OS=Arabidopsis thaliana OX=3702 GN=GPX1 PE=2 SV=2	7.377	10	2	11	2	236	26	9.38	22.9	2	1.492	1.18	0.791	0.949282	0.962593	0.869414	14.11	16.59	34.57	82.2	117.4	100.3	10.54	64.44	21.57
1150717241	transmembrane protein 87A [Asparagus officinalis]	5.643	10	2	2	2	523	57.8	6.58	0	2	1.183	0.901	0.761	0.949282	0.962593	0.922029	31.51	20.67	61.83	111.1	107.3	81.7	11.73	30.2	26.48
1150709719	3-oxoacyl-[acyl-carrier-protein] synthase III, chloroplastic-like isoform X1 [Asparagus officinalis]	8.922	8	2	24	2	411	43.3	5.86	44.14	2	1.258	1.126	0.873	0.949282	0.962593	0.957433	10.43	3.74	6.42	88.7	106.4	104.9	4.79	10.55	12.01
1150743526	28 kDa ribonucleoprotein, chloroplastic-like [Asparagus officinalis]	8.271	11	2	14	2	311	34.3	4.6	18.4	2	1.164	1.113	1.039	0.949282	0.962593	0.99536	14.5	1.2	12.94	95	92.1	112.9	12.52	16.75	18.14
1150734016	histone-lysine N-methyltransferase, H3 lysine-9 specific SUVH3-like [Asparagus officinalis]	10.122	5	2	8	2	672	74.1	7.12	3.83	2	0.39	0.427	1.096	0.949282	0.966238	0.972144	2.25	39.07	29.14	163.1	67.3	69.7	5.15	9.11	36.88
1150716636	KH domain-containing protein At4g18375 [Asparagus officinalis]	15.588	6	2	13	2	624	67.3	6.38	24.77	2	0.447	0.516	1.042	0.949282	0.966919	0.995088	2.04	45.29	16.07	152.8	68.3	78.9	3.22	25.61	39.45
1150668603	uncharacterized protein LOC109827089 isoform X2 [Asparagus officinalis]	10.511	13	2	5	2	371	40.6	6.95	5.74	2	0.422	0.527	1.479	0.949282	0.968326	0.812757	35.53	6.83	9.16	154.1	64.8	81.2	0.28	28.57	14.94
1150678595	probable lactoylglutathione lyase, chloroplastic [Asparagus officinalis]	5.79	8	2	2	2	285	32	5.63	3.98	2	0.449	0.545	1.389	0.949282	0.98003	0.882348	32.16	9.45	27.11	156.1	58.9	85.1	12.6	32.19	6.55
1150733559	phosphatidylinositol 3,4,5-trisphosphate 3-phosphatase and protein-tyrosine-phosphatase PTEN2A [Asparagus officinalis]	8.021	5	2	9	2	604	66.8	5.86	0	2	0.469	0.584	1.247	0.949282	0.98003	0.918536	39.9	41.69	2.49	149	67.2	83.8	9.85	39.53	63.52
Q9CB01	Ras-related protein RABF1 OS=Arabidopsis thaliana OX=3702 GN=RABF1 PE=1 SV=1	7.485	11	2	6	1	202	21.9	6.58	14.19	2	0.4	0.595	1.266	0.949282	0.98003		79.61	67.6	25.93	140.8	75.4	83.8	104.89	20.1	13.63
1150746593	alkaline/neutral invertase CINV2-like [Asparagus officinalis]	4.075	4	2	3	2	545	61.8	6.24	0	2	1.281	0.847	0.766	0.949282	0.982884	0.918093	7.09	48.27	35.74	100	113.2	86.8	18.96	14.43	20.37
1150685848	eukaryotic translation initiation factor 3 subunit J-like [Asparagus officinalis]	5.46	9	2	5	1	258	29.2	5.26	1.87	2	0.404	0.57	1.223	0.949282	0.990573	0.924157	1.63	24.74	22.86	137.2	73.2	89.6	17.58	54.22	26.54
1150679156	LOW QUALITY PROTEIN: mitogen-activated protein kinase 1-like [Asparagus officinalis]	6.682	5	2	2	2	382	43.6	5.48	4.95	2	0.456	0.686	1.531	0.949282	0.993356	0.797418	6.16	8.69	2.64	150.6	58.5	90.9	9.97	21.04	14.17
1150709467	transcription initiation factor IIF subunit alpha [Asparagus officinalis]	9.171	6	2	5	2	533	58.6	5.16	2.64	2	0.397	0.64	1.846	0.949282	0.999557	0.57215	50.54	18.7	25.46	146.3	60.4	93.3	2.39	36.85	47.84
1150736421	inositol-phosphate phosphatase-like [Asparagus officinalis]	5.267	7	2	11	2	275	29.6	5.62	21.12	2	0.495	0.35	0.868	0.952529	0.910986	0.960679	41.91	45.04	20.59	162.6	80.4	57	5.88	42.72	56.03
1150691474	probable protein phosphatase 2C 62 [Asparagus officinalis]	9.484	11	2	8	2	285	30.7	7.28	11.95	2	1.127	1.181	0.926	0.95458	0.96313	0.974307	18.94	33.5	33.93	87.8	108.4	103.7	6.11	21.82	20.61
1150738773	glutathione S-transferase DHAR3, chloroplastic-like [Asparagus officinalis]	4.755	9	2	3	1	245	27.7	6.42	4.11	2	1.19	4.873	5.866	0.955272	0.457964	0.000201358	44.76	90.9	18.69	31.9	39	229.1	45.57	2.82	70.2
Q40977	Monodehydroascorbate reductase OS=Pisum sativum OX=3888 PE=1 SV=1	18.929	7	2	65	1	433	47.3	6.11	187.9	2	1.238	1.996	0.605	0.955272	0.864568	0.753392	43.68	135.29	119.63	47.7	157.2	95.2	94.79	52.51	65.28
1150703768	LOW QUALITY PROTEIN: chitin elicitor-binding protein-like, partial [Asparagus officinalis]	8.907	6	2	14	2	366	38.8	6.38	29.18	2	1.267	1.874	1.529	0.955272	0.87681	0.56917	6.02	11.23	4.15	69.2	91.3	139.5	26.3	13.23	15.85
1150709842	protein TIC 21, chloroplastic [Asparagus officinalis]	7.816	9	2	17	2	287	30.2	10.42	18.7	2	0.498	0.278	0.746	0.955272	0.893591	0.916613	33.63	37.49	39.02	170	82.7	47.3	2.54	28.67	63.25
1150670546	LOW QUALITY PROTEIN: LIMR family protein Os06g0128200-like [Asparagus officinalis]	15.485	4	2	7	1	507	56.1	8.95	14.28	2	1.185	1.676	1.229	0.955272	0.903581	0.916613	13.64	1.16	23.6	76.1	100.4	123.4	15.94	7.66	10.84
1150689754	uncharacterized protein LOC109832861 [Asparagus officinalis]	13.613	5	2	17	2	491	55.3	5.77	33.85	2	1.177	1.304	1.184	0.955272	0.935516	0.924379	4.21	2.53	2.81	85	100.2	114.8	6.21	3	5.19
1150726706	uncharacterized protein LOC109848874 [Asparagus officinalis]	8.594	11	2	3	2	316	36.1	8.05	0	2	0.482	0.496	1.03	0.955272	0.966238	0.995088	57.74	22.54	39.46	156.6	70.6	72.8	15.66	47.39	18.69
1150716074	callose synthase 12-like [Asparagus officinalis]	4.65	1	2	7	1	1768	204.8	9.13	8.59	2	1.122	0.905	0.857	0.955272	0.975448	0.984408	19.78	12.78	9.24	98.5	111.4	90.1	7.71	8.56	15.88
1150729983	signal peptidase complex catalytic subunit SEC11A-like [Asparagus officinalis]	9.595	13	2	9	2	180	20.1	7.56	24.98	2	0.618	0.674	1.09	0.955272	0.98003	0.97878	1.37	53.09	39.27	130.9	80.9	88.2	8.26	13.41	46.09
1150716086	mediator of RNA polymerase II transcription subunit 15-like [Asparagus officinalis]	9.356	4	2	12	1	523	57.5	6.95	19.72	2	1.227	0.544	0.443	0.955272	0.982884	0.324444	89.11	70.4	21.02	99.9	155.2	44.9	89.57	48.64	66.08
1150687372	ABC transporter C family member 14-like [Asparagus officinalis]	11.656	3	2	7	2	809	90.8	5.24	12.27	2	1.282	0.799	0.623	0.955272	0.990002	0.634669	25.96	18.41	4.33	97.4	124.8	77.8	17.31	19.68	11.79
1150741079	dihydroorotate dehydrogenase (quinone), mitochondrial isoform X1 [Asparagus officinalis]	29.542	7	2	24	2	457	48.5	9.25	69.16	2	1.247	1.023	0.521	0.95583	0.98003	0.0945761	2.04	64.84	19.05	87.3	136.9	75.8	19.99	15.44	43.86
1150704939	LOW QUALITY PROTEIN: peroxidase 47-like [Asparagus officinalis]	13.272	10	2	7	2	318	34.7	6.15	8.41	2	0.447	0.429	0.842	0.957221	0.962593	0.972144	2.4	23.38	67.72	144.5	70.8	84.6	48.44	24.39	46.24
1150719150	uncharacterized protein LOC109845318 [Asparagus officinalis]	12.454	12	2	13	2	242	26.8	9.7	19.41	2	1.099	1.564	1.423	0.958155	0.909918	0.801183	3.34	26.33	21.37	83.2	89.5	127.4	8.18	3.68	18.41
1150736059	LOW QUALITY PROTEIN: probable protein phosphatase 2C 55 [Asparagus officinalis]	6.12	5	2	4	2	465	49.3	6.93	4.43	2	0.476	0.369	1	0.958155	0.92641	0.995088	0.43	2.92	38.24	160.7	76.2	63.1	3.88	10.65	33.23
1150710914	probable AMP deaminase [Asparagus officinalis]	5.827	9	2	5	2	228	25	5.08	1.69	2	1.103	1.033	0.99	0.95935	0.974473	0.997569	9.69	3.98	8.32	96.4	102.4	101.3	7.06	11.1	3.3
1150720062	HMG-Y-related protein A-like, partial [Asparagus officinalis]	18.075	36	2	17	2	83	9	5.78	66.55	2	0.642	0.147	0.237	0.959365	0.31236	0.00022121	4.97	114.18	41.79	158.9	117.7	23.4	46.66	11.53	83.98
1150721196	(-)-alpha-terpineol synthase-like isoform X1 [Asparagus officinalis]	3.393	4	2	3	2	641	74.4	6.35	0	2	1.029	2.363	4.33	0.959365	0.711948	0.0139697	69.66	33.31	8.39	70.1	64.2	165.7	38.95	31.81	75.75
1150678453	uncharacterized protein LOC109822573 isoform X2 [Asparagus officinalis]	6.052	2	2	5	2	1566	172.3	6.29	0	2	0.51	0.285	0.618	0.959365	0.901572	0.814499	6.82	4.73	13.62	173.9	78	48.2	15.46	16.46	4.34
1150673369	ras GTPase-activating protein-binding protein 1 [Asparagus officinalis]	4.178	8	2	3	2	538	59.7	4.89	3.93	2	0.479	0.291	0.606	0.959365	0.903873		56.57	23.34	24.73	169.5	81.2	49.2	48.99	10.78	32.74
1150690247	2-methyl-6-phytyl-1,4-hydroquinone methyltransferase 1, chloroplastic [Asparagus officinalis]	10.312	14	2	3	2	340	38.7	9.33	6.14	2	0.51	0.314	0.499	0.959365	0.905257	0.452967	28.03	55.19	7.79	160.3	93.1	46.5	11.13	20.03	56.6
Q01517	Fructose-bisphosphate aldolase 2, chloroplastic OS=Pisum sativum OX=3888 PE=1 SV=2	3.897	5	2	31	1	349	37.8	5.59	57.78	2	1.15	1.577	1.371	0.959365	0.905257	0.83898	18.95	13.74	5.98	80.5	92.6	126.9	5.35	16.84	7.93
1150680096	acyl-protein thioesterase 1 homolog 1-like isoform X1 [Asparagus officinalis]	3.841	7	2	9	2	258	27.3	6.52	2.1	2	1.117	1.523	1.297	0.959365	0.912556	0.916613	1.74	7.3	26.04	81.9	93.4	124.7	8.74	19.3	15.86
1150679604	bifunctional protein FolD 4, chloroplastic-like isoform X1 [Asparagus officinalis]	9.368	10	2	5	2	367	39.3	8.22	11.1	2	0.492	0.344	0.821	0.959365	0.913884	0.948133	0.95	21.8	7.48	166.4	76.3	57.3	9.13	15.81	31.88
1150668709	CO(2)-response secreted protease-like [Asparagus officinalis]	8.58	4	2	3	2	762	80.4	8.12	3.97	2	0.483	0.335	0.824	0.959365	0.92641		4.73	4.65	33.22	166.5	77.7	55.8	4.29	44.62	8.61
1150734118	protein SLOW GREEN 1, chloroplastic-like [Asparagus officinalis]	16.347	15	2	6	2	193	22.2	6.02	13.25	2	0.503	0.422	1.085	0.959365	0.949627	0.977777	8.45	1.63	41.29	160.1	67.1	72.8	14.6	34.04	5.25
1150743780	mRNA-decapping enzyme-like protein isoform X1 [Asparagus officinalis]	8.447	6	2	5	2	373	40.7	5.33	10.23	2	0.54	0.487	1.011	0.959365	0.962593	0.995088	27.3	8.44	36.95	147	77.6	75.5	7.12	20.04	17.43
1150693013	alcohol dehydrogenase-like 7 [Asparagus officinalis]	4.824	5	2	13	2	384	41.9	8.02	13.59	2	0.506	1.061	2.082	0.959365	0.966238	0.394135	13.78	46.54	14.98	125	64	111	10.34	29.95	37.45
1150739171	glutathione S-transferase U17-like [Asparagus officinalis]	9.682	14	2	4	2	229	25.3	5.16	7.01	2	0.995	1.134	1.323	0.959365	0.966238	0.916613	24.05	70.02	93.86	78.7	94.7	126.6	22	10.87	112.24
1150744588	SAL1 phosphatase-like isoform X1 [Asparagus officinalis]	5.621	8	2	3	2	418	44.5	7.01	4.38	2	1.05	0.46	0.567	0.959365	0.967513	0.717037	33.82	69.79	46.59	123.2	129.5	47.3	10.05	30.8	58.81
1150705938	uncharacterized protein LOC109839627 [Asparagus officinalis]	9.181	10	2	25	2	335	37.3	6.44	53.74	2	1.024	1.05	1.012	0.959365	0.970422	0.995088	8.09	5.97	0.69	96.5	101.4	102.1	7.14	2.27	1.64
1150702269	clathrin interactor EPSIN 1-like isoform X1 [Asparagus officinalis]	3.946	4	2	2	2	558	59.8	5.26	0	2	1.11	0.95	0.742	0.959365	0.973844	0.916613	33.61	8.82	20.85	97.1	107.8	95	13.59	21.44	23.6
1150690186	uncharacterized protein LOC109833001 [Asparagus officinalis]	4.792	6	2	4	2	359	40.1	7.64	8.95	2	0.558	0.988	1.743	0.959365	0.97922	0.533087	2.37	21.74	13.06	117.5	66.6	116	7.93	11.07	24.78
1150732572	eukaryotic translation initiation factor 6-2 [Asparagus officinalis]	18.313	13	2	23	2	245	26.6	4.81	38.01	2	1.216	1.045	0.766	0.959365	0.98003	0.836712	1.36	17.34	10.75	92	111.9	96.1	5.62	31.42	24.55
1150698742	protein RETICULATA-RELATED 1, chloroplastic-like [Asparagus officinalis]	5.18	6	2	2	2	382	41.2	7.85	4.22	2	1.159	0.955	0.824	0.959365	0.98003	0.922029	22.77	70.25	12.2	96.4	111.6	92	36.62	10.98	25.07
1150736219	uncharacterized protein LOC109820359 isoform X1 [Asparagus officinalis]	7.015	4	2	5	2	493	54.1	6.06	10.83	2	0.516	0.597	1.313	0.959365	0.982884	0.916613	43.66	16.08	32.91	138.1	71.3	90.6	16.18	22.98	12.79
1150717988	nuclear pore complex protein NUP50B-like [Asparagus officinalis]	9.08	5	2	16	2	426	45.7	4.87	17.77	2	0.548	0.592	1.079	0.959365	0.982884	0.990806	8.38	18.75	35.06	138.3	79.8	81.8	14.5	6.41	42.1
1150669443	phospholipase A-2-activating protein [Asparagus officinalis]	14.354	6	2	12	2	535	58.7	5.83	29.07	2	0.517	0.633	1.224	0.959365	0.983932	0.948133	8.46	45.67	51.1	143.5	70.4	86.1	11.73	17.63	51.07
1150734653	transcription factor Pur-alpha 1-like [Asparagus officinalis]	6.201	11	2	3	1	280	31.1	6.05	6.3	2	0.992	0.603	0.583	0.959365	0.985953	0.797418	15.48	9.98	57.81	125	110.5	64.5	22.72	51.87	31.3
1150699835	small heat shock protein, chloroplastic [Asparagus officinalis]	16.599	20	2	6	2	156	17.5	9.72	14.68	2	1.166	0.806	0.738	0.959365	0.992926	0.882348	13.53	53.85	9.99	106.4	109.3	84.3	37.44	18.72	3.13
1150741002	thioredoxin-like protein CXXS1 [Asparagus officinalis]	20.311	17	2	52	2	123	13.6	5.03	151.05	2	0.633	0.764	1.671	0.959365	0.994357	0.202521	1.35	58.19	26.55	137.8	88	74.2	19.44	34.47	53.78
1150684227	beta-fructofuranosidase, insoluble isoenzyme 3-like [Asparagus officinalis]	9.578	4	2	11	1	573	64.3	6.35	15.12	2	1.077	0.972	1.052	0.95983	0.966238	0.990161	25.77	21.05	39.89	93.5	100.7	105.9	23.9	12.91	15.39
1150668541	LOW QUALITY PROTEIN: probable inactive purple acid phosphatase 2 [Asparagus officinalis]	14.463	5	2	11	2	645	72.9	6.27	22.59	2	0.523	0.816	1.869	0.960709	0.999557	0.493525	29.38	63.56	1.41	127.2	69	103.8	27.91	20.94	19.88
1150718027	16.0 kDa heat shock protein, peroxisomal [Asparagus officinalis]	13.294	17	2	13	2	140	16	7.5	26.9	2	0.7	0.569	0.995	0.962889	0.961383	0.999335	28.83	43.24	19.61	152.9	84.1	63	26.99	31.04	52.21
1150725039	tropinone reductase homolog At5g06060-like isoform X1 [Asparagus officinalis]	9.958	11	2	10	2	268	28.6	6.87	12.74	2	0.537	0.885	1.726	0.962913	0.985953	0.683737	20.35	12.84	56.09	123.4	66.2	110.4	13.14	40.08	50.12
1150732806	mitogen-activated protein kinase 6 [Asparagus officinalis]	7.533	7	2	4	2	372	42.6	6.42	7.27	2	0.544	1.246	1.723	0.963088	0.953788	0.643861	17.21	22.99	41.5	110.2	60	129.9	6.07	15.15	37.17
1150709484	probable serine/threonine-protein kinase DDB_G0276461 [Asparagus officinalis]	5.533	3	2	6	2	655	73.1	7.14	9.33	2	0.527	0.361	0.794	0.964132	0.92641	0.948133	12.03	41.46	13.37	162.2	85.5	52.4	28.19	19.1	51.81
1150683798	protein TIC 40, chloroplastic-like [Asparagus officinalis]	8.799	8	2	3	1	416	45.4	6.01	1.93	2	0.504	0.441	0.808	0.96425	0.953557	0.960679	11.25	12.31	22.63	151	82.3	66.6	5.3	12.15	61.03
1150721906	gamma-interferon-inducible lysosomal thiol reductase-like [Asparagus officinalis]	6.781	17	2	4	2	191	21.5	5.05	2.49	2	1.004	1.103	1.412	0.964316	0.966238	0.916613	6.06	19.53	3.77	93.5	93.9	112.6	15.32	28.99	15.07
1150733296	IAA-alanine resistance protein 1 isoform X1 [Asparagus officinalis]	12.977	6	2	10	2	466	49.7	6.54	11.99	2	0.987	1.221	1.102	0.96445	0.957023	0.98762	3.57	29.35	22.12	90.5	98.9	110.6	8.01	13.27	18.65
1150703014	pyrophosphate-energized membrane proton pump 2-like [Asparagus officinalis]	9.683	3	2	21	1	888	95.2	7.61	54.46	2	0.544	1.186	1.69	0.964942	0.962593	0.664845	9.75	66.41	35.77	108.5	60.2	131.3	1.85	75.59	75.41
1150709196	AP-1 complex subunit mu-2 [Asparagus officinalis]	10.753	7	2	14	1	428	49	6.58	19.16	2	1.046	1.019	1.034	0.964942	0.962593	0.995088	16.54	9.12	22.61	94.6	108.9	96.5	15.87	61.85	43.06
1150736429	inositol monophosphatase 3-like [Asparagus officinalis]	6.431	7	2	7	2	275	29.4	5.07	14.93	2	0.601	0.32	0.532	0.965972	0.90509	0.419821	17.78	25.65	7.03	165.8	89	45.2	18.42	31.26	72.68
Q941T9	Probable mannose-1-phosphate guanylyltransferase 2 OS=Oryza sativa subsp. japonica OX=39947 GN=Os01g0847200 PE=2 SV=1	13.206	11	2	25	2	361	39.6	6.86	73.99	2	1.097	1.188	1.198	0.965972	0.950938	0.921803	1.61	14.79	15.81	92	98.6	109.3	6.06	14.09	5.3
1150696467	WAS/WASL-interacting protein family member 3 [Asparagus officinalis]	6.34	13	2	27	2	163	18	9.99	64.09	2	0.691	0.611	0.882	0.965972	0.957023	0.946676	0.2	26.16	19.5	135	87.7	77.4	5.34	6.73	23.22
1150727030	pre-mRNA-splicing factor SYF1 [Asparagus officinalis]	7.719	3	2	7	2	892	103.5	6.77	3.37	2	1.075	0.996	0.927	0.965972	0.962593	0.990161	5.35	15.16	19.96	97.7	105	97.3	7.96	4.92	37.55
1150699968	probable plastid-lipid-associated protein 3, chloroplastic [Asparagus officinalis]	4.738	10	2	2	2	382	41.9	4.81	0	2	1.029	1.116	1.478	0.965972	0.966238	0.876701	12.94	9.33	12.4	79.6	88.9	131.5	34.17	6.36	24.83
1150676901	RPM1-interacting protein 4-like [Asparagus officinalis]	10.373	38	2	12	2	80	8.6	6.6	9.46	2	0.985	0.636	0.666	0.965972	0.985953	0.857232	7.24	2.32	4.84	116.9	109.9	73.2	22.18	34.42	63.34
1150748595	senescence-specific cysteine protease SAG39-like [Asparagus officinalis]	11.898	15	2	4	2	303	32.3	5.45	8.36	2	0.96	0.962	1.003	0.966899	0.953788	0.995088	72.88	19.51	32.16	110.4	95.7	93.9	71.31	36.07	34.53
1150726712	gamma-glutamylcyclotransferase 2-3 [Asparagus officinalis]	7.49	12	2	15	2	188	21.2	5.63	25.35	2	0.585	0.253	0.368	0.967259	0.864568	0.134828	7.94	33.22	27.03	160.9	98.4	40.8	8.78	16.92	20.18
Q2QM47	Serine/threonine-protein phosphatase BSL2 homolog OS=Oryza sativa subsp. japonica OX=39947 GN=BSL2 PE=2 SV=2	7.689	2	2	8	2	1009	106.4	5.86	16.73	2	1.11	0.276	0.258	0.967259	0.875739	0.00237248	7.73	23.25	5.74	129.5	136.6	33.9	5.37	14.58	26.87
1150742858	aldehyde dehydrogenase family 3 member H1-like [Asparagus officinalis]	9.425	6	2	4	2	493	54.1	8.91	4.71	2	0.522	0.371	0.682	0.967259	0.934163		17.62	6.24	13.2	162	71.3	66.7	13.57	30.99	22.2
1150672662	gamma-glutamyl hydrolase 2-like [Asparagus officinalis]	10.766	13	2	5	2	297	33	6	7.94	2	0.558	1.165	1.7	0.967259	0.962593	0.7155	24.82	18.85	24.11	129.6	61.9	108.5	27.34	12.87	21.5
1150697358	factor of DNA methylation 1-like [Asparagus officinalis]	5.161	19	2	2	2	123	14.6	4.92	0	2	1.012	0.869	0.855	0.967259	0.983932	0.961683	0.48	11.99	8.38	102.6	103.9	93.5	12.68	11.52	20.7
1150735371	protein disulfide isomerase-like 1-5 [Asparagus officinalis]	12.021	5	2	11	2	530	59.7	5.01	24.61	2	0.663	0.833	1.248	0.967259	0.992926	0.916613	32.73	2.71	0.92	118.7	80.5	100.7	9.56	30.85	22.5
1150690483	U1 small nuclear ribonucleoprotein 70 kDa [Asparagus officinalis]	12.939	5	2	34	2	501	59.2	9.19	20.97	2	1.008	0.805	0.798	0.967259	0.999557	0.916613	3.04	7.3	4.11	106.3	105.6	88.1	10.99	2.72	10.03
1150710387	protein FLX-like 4 [Asparagus officinalis]	16.412	7	2	9	2	299	33.3	7.33	21.13	2	0.951	1.342	1.371	0.967341	0.942726	0.916613	10.8	4.16	20.43	88.7	92.3	119	10.13	17.94	4
1150728210	plant intracellular Ras-group-related LRR protein 6 [Asparagus officinalis]	7.979	6	2	5	2	584	64	5.67	10.79	2	0.963	1.079	1.12	0.967341	0.967513	0.971306	8.34	0.33	12.72	101	89.8	109.2	25.6	25.27	30.65
1150742946	thymidylate kinase [Asparagus officinalis]	5.993	9	2	22	2	217	24.4	6.27	35.11	2	1.068	1.39	1.277	0.969429	0.92384	0.916613	2.82	28.74	19.21	86.2	93.9	119.9	16.76	14.88	16.86
1150708097	mitogen-activated protein kinase kinase 4 [Asparagus officinalis]	23.446	20	2	16	2	192	21.2	7.34	22.29	2	0.556	0.424	0.764	0.969429	0.961383	0.923153	81.66	58.79	2.64	153	83.3	63.6	10.88	77.48	59.46
1150727288	LOW QUALITY PROTEIN: oxalate--CoA ligase [Asparagus officinalis]	10.206	5	2	6	2	511	54.4	7.4	4.55	2	0.583	0.273	0.485	0.969603	0.893591	0.452967	5.49	0.56	4.91	160.9	93.7	45.4	15.83	0.15	11.49
1150739361	LOW QUALITY PROTEIN: universal stress protein PHOS34 [Asparagus officinalis]	3.604	9	2	14	2	172	18.3	7.34	5.81	2	1.047	0.972	1.038	0.971574	0.974473	0.995088	12.86	1.65	26.22	96.5	109.8	93.8	11.42	16.11	49.99
1150732470	branched-chain-amino-acid aminotransferase 5, chloroplastic-like [Asparagus officinalis]	10.131	7	2	6	2	388	42.3	7.71	5.95	2	0.934	1.515	1.453	0.973328	0.919359	0.85188	15.35	1.72	13.74	88.3	80.2	131.5	3.74	29.07	34.73
1150731023	ubiquitin carboxyl-terminal hydrolase 2-like [Asparagus officinalis]	4.395	6	2	4	2	319	36.8	5.67	8.96	2	0.712	0.615	0.936	0.973481	0.975448	0.990161	1.61	11.9	25.24	132	86.7	81.2	9.65	10.8	32.56
1150673207	putative uncharacterized protein DDB_G0294196 [Asparagus officinalis]	13.704	8	2	4	2	498	54	7.17	9.35	2	0.927	0.693	0.669	0.973541	0.996327	0.859906	5.41	27.64	4	110	113.8	76.2	27.81	30.41	44.5
1150712184	nudix hydrolase 3 [Asparagus officinalis]	13.334	4	2	9	2	768	87	5.27	11.43	2	0.712	0.629	0.783	0.974619	0.98003	0.916613	15.91	1.88	16.87	129.1	95.9	75.1	7.9	8.93	23.95
1150734066	oligouridylate-binding protein 1-like [Asparagus officinalis]	9.816	5	2	13	1	424	46	7.12	25.87	2	0.942	0.799	0.895	0.975013	0.99865	0.972144	1	51.81	46.55	111	100.3	88.7	12.34	14.25	61.3
1150704470	LOW QUALITY PROTEIN: 24-methylenesterol C-methyltransferase 2-like [Asparagus officinalis]	3.112	7	2	5	2	336	36.7	9.33	4.49	2	0.585	2.688	3.386	0.975174	0.831895	0.024019	38.96	95.71	88.6	95.5	55.9	148.7	51.76	24.33	78.34
1150699718	uncharacterized protein LOC109837026 [Asparagus officinalis]	16.859	20	2	11	2	169	18.8	7.33	28.1	2	0.717	0.443	1.051	0.975174	0.92641	0.990161	9.89	10.72	66.96	135.6	104.2	60.2	4.39	31.02	74.34
1150748387	copper chaperone for superoxide dismutase, chloroplastic [Asparagus officinalis]	10.426	11	2	7	2	315	33.2	6.02	17.57	2	0.999	1.387	0.874	0.975174	0.934163	0.960679	7.92	0.68	55.34	95.5	109.1	95.4	23.75	11.19	80.87
1150743764	subtilisin-like protease SBT5.6 isoform X1 [Asparagus officinalis]	17.734	4	2	21	2	774	82.6	5.67	50.32	2	0.588	0.501	0.852	0.975174	0.967513	0.960679	6.09	22.36	54.72	143.6	84.5	72	8.2	18.18	24.15
1150672957	protein RER1B-like [Asparagus officinalis]	4.688	10	2	3	2	189	21.9	9.48	1.69	2	0.926	1.016	1.097	0.975174	0.974473	0.990806	4.52	5.39	10.74	101.6	99	99.4	9.64	15.21	12.13
1150718015	dnaJ homolog subfamily B member 13-like isoform X1 [Asparagus officinalis]	11.731	8	2	17	2	345	37.8	9.16	31.21	2	1.045	0.916	0.883	0.975174	0.98003	0.961683	4.02	9.97	1.01	101.4	105.5	93.1	14.02	0.6	1.74
1150701297	salicylic acid-binding protein 2-like [Asparagus officinalis]	14.996	15	2	24	2	278	30.6	5.07	65.98	2	0.96	0.861	1.03	0.975174	0.987245	0.995088	3.89	30.8	22.61	109.1	101.9	89	5.45	14.33	32.31
1150715287	huntingtin-interacting protein K [Asparagus officinalis]	12.495	27	2	5	2	111	12.4	5.24	4.7	2	0.987	0.795	0.858	0.975174	0.998584	0.946676	9.78	25.13	26.05	105.6	104.3	90.1	13.04	6.47	15.18
1150680424	uncharacterized protein LOC109828862 [Asparagus officinalis]	12.536	42	2	11	2	96	10.3	10.49	9.71	2	0.583	0.199	0.674	0.97612	0.798284	0.859906	21.63	94.46	23.91	168.4	98.1	33.5	4.91	57.53	77.9
1150685724	protein RETICULATA-RELATED 3, chloroplastic-like, partial [Asparagus officinalis]	26.299	15	2	36	2	209	22	8.12	105.82	2	1.106	0.713	0.605	0.977499	0.985953	0.394135	9.67	26	23.33	107.4	120	72.6	16.56	7.93	15.29
1150722684	protein FLX-like 3 [Asparagus officinalis]	10.655	17	2	8	2	196	22	9	10.36	2	0.926	0.343	0.416	0.979824	0.910432	0.192268	10.99	12.28	18.37	131.3	120.6	48.1	11.78	2.72	20.36
1150692490	LOW QUALITY PROTEIN: THO complex subunit 2 [Asparagus officinalis]	12.145	2	2	11	2	1781	201.9	7.47	4.19	2	0.895	1.178	1.382	0.980948	0.937183	0.916613	24.79	7.43	10.42	102.8	79.8	117.4	9.9	19.83	4.73
1150735794	inactive protein RESTRICTED TEV MOVEMENT 2-like [Asparagus officinalis]	8.454	9	2	8	2	358	41.3	5.33	0	2	0.531	0.596	1.331	0.98404	0.987245	0.916613	48.77	23.38	17.71	137.5	73.1	89.4	34.88	42.17	44.11
1150715524	glucan endo-1,3-beta-glucosidase 6-like isoform X2 [Asparagus officinalis]	5.414	4	2	5	2	473	52	5.26	9.39	2	1.031	0.894	0.884	0.985635	0.983932	0.955876	4.04	17.01	1.32	101.6	109.4	89	3.3	7.59	16.5
1150740644	protein MODIFIER OF SNC1 11-like [Asparagus officinalis]	7.565	21	2	6	2	192	21.1	5.45	5.07	2	0.918	0.599	0.97	0.985923	0.982884	0.995088	53.81	85.32	54.67	122.2	104.6	73.2	42.41	48.9	54.23
1150730006	LOW QUALITY PROTEIN: mRNA-decapping enzyme subunit 2-like, partial [Asparagus officinalis]	8.202	8	2	9	2	335	37.6	6.65	10.91	2	0.603	0.308	0.959	0.986803	0.905257	0.995088	17.47	66.41	50.6	169.8	77.9	52.3	20.01	59.14	75.39
Q9SQI8	Dihydrolipoyllysine-residue acetyltransferase component 4 of pyruvate dehydrogenase complex, chloroplastic OS=Arabidopsis thaliana OX=3702 GN=LTA2 PE=2 SV=1	12.259	5	2	33	2	480	50	8.37	80.85	2	0.778	0.476	0.563	0.986803	0.920051	0.378321	4.67	12.95	5.37	132.2	104.8	63	9.5	15.34	12.93
1150716697	oligouridylate-binding protein 1-like [Asparagus officinalis]	7.996	5	2	8	1	419	45.8	7.06	12.57	2	0.564	0.518	0.932	0.986803	0.973844		30.61	2.39	25.98	147.3	83.1	69.6	7.3	28.5	12.88
1150683320	ferritin-4, chloroplastic-like [Asparagus officinalis]	6.751	16	2	4	1	255	28.5	5.64	6.13	2	0.555	0.606	1.092	0.986803	0.985953		62.19	41.36	16.29	122.1	85.6	92.3	59.51	19.09	16.62
1150721188	late embryogenesis abundant protein Lea14-A-like [Asparagus officinalis]	19.596	17	2	12	2	151	16.6	5.17	30.81	2	0.641	0.209	0.46	0.987812	0.794318	0.352294	9.61	58.17	11.94	179.5	83.1	37.4	17.74	24.83	53.82
1150726908	hexokinase-3-like [Asparagus officinalis]	10.109	6	2	9	1	500	54.3	6.06	12.42	2	0.902	0.766	0.733	0.987812	0.985953	0.916613	20.38	33.85	9.13	112.4	101.5	86.1	12.44	36.97	12.56
1150744634	mitochondrial outer membrane protein porin 6 [Asparagus officinalis]	20.496	12	2	10	2	276	29.4	8.82	22.71	2	0.618	0.596	0.963	0.990187	0.982884	0.995088	29.54	22.54	1.72	129.5	86.3	84.2	20.43	11.4	8.16
1150730951	universal stress protein PHOS34-like [Asparagus officinalis]	24.371	20	2	26	2	164	18	7.18	79.82	2	0.712	1.004	1.364	0.990966	0.966238	0.664685	4.91	13.77	3.09	115.7	78.9	105.4	35.82	35.83	55.03
1150747720	ankyrin repeat and SAM domain-containing protein 6-like isoform X1 [Asparagus officinalis]	6.372	12	2	6	2	217	23.8	9.83	3.75	2	0.637	0.242	0.731	0.991268	0.861638	0.876706	23.49	27.49	84.81	146.2	110.6	43.2	14.33	48.95	102.67
1150706958	fasciclin-like arabinogalactan protein 7 [Asparagus officinalis]	17.803	11	2	23	2	254	26.5	7.42	66.18	2	0.738	1.179	1.412	0.991268	0.930055	0.629973	2.71	32.49	19.47	96.1	90.6	113.3	20.31	14.39	10.81
1150744858	angio-associated migratory cell protein [Asparagus officinalis]	7.203	5	2	4	2	394	42.3	4.54	6.51	2	0.876	1.124	1.282	0.991268	0.962593	0.916613	8.68	7.88	0.34	94.3	90	115.7	10.48	22.91	9.41
1150701392	COP9 signalosome complex subunit 3 [Asparagus officinalis]	4.756	4	2	12	2	422	48.1	7.33	19.64	2	0.636	0.554	1.06	0.991268	0.975448	0.995088	12.63	7.75	39.07	138	89.4	72.7	11	23.57	35.4
1150700563	glucose-6-phosphate 1-dehydrogenase, chloroplastic-like isoform X2 [Asparagus officinalis]	6.497	3	2	11	1	583	65.9	9.16	24.57	2	0.62	0.538	0.868	0.991268	0.98003	0.971938	2.97	83.35	56.7	143	86.9	70.1	7.4	28.08	79.57
1150747394	ATP-dependent Clp protease proteolytic subunit 4, chloroplastic [Asparagus officinalis]	12.12	12	2	21	2	290	31.2	5.54	51.45	2	0.875	0.611	0.757	0.991268	0.982884	0.916613	2.31	3.25	12.51	122.4	104.5	73.2	2.32	7	17.03
1150716661	U5 small nuclear ribonucleoprotein 40 kDa protein [Asparagus officinalis]	9.671	11	2	8	2	340	37.4	7.8	17.33	2	0.893	0.602	0.814	0.991268	0.98377	0.946676	39.15	51.92	30.8	123.3	105.5	71.2	6.57	56.33	47.52
Q8VWG7	TPR repeat-containing thioredoxin TDX OS=Arabidopsis thaliana OX=3702 GN=TDX PE=1 SV=1	9.54	3	2	9	1	380	42.8	5.72	19.85	2	0.594	0.694	1.049	0.991268	0.999557	0.989647	11.66	1.73	4.61	127.5	84.2	88.3	11.9	6.33	16.84
O24174	Betaine aldehyde dehydrogenase 1 OS=Oryza sativa subsp. japonica OX=39947 GN=BADH1 PE=1 SV=1	8.574	5	2	5	1	505	54.6	7.02	12.03	2	0.854	17.117	5.116	0.991757	0.0808271	3.00227e-05	124	104.43	53.24	21.9	7.9	270.2	42.68	146.81	80.38
1150740236	peptidyl-prolyl cis-trans isomerase FKBP20-1-like [Asparagus officinalis]	14.317	13	2	7	2	188	20	7.37	18.01	2	0.732	0.191	0.261	0.991757	0.794318	0.00840112	21.52	20.79	49.49	156	114.2	29.8	20.07	39.96	6
1150709043	60S ribosomal protein L28-1-like [Asparagus officinalis]	29.27	25	2	30	1	146	16.3	10.7	116.52	2	0.607	0.252	0.385	0.991757	0.87681		10.65	57.29	57.49	168.7	94.8	36.5	17.37	60.87	60.46
1150711330	acylpyruvase FAHD1, mitochondrial, partial [Asparagus officinalis]	15.285	23	2	20	2	123	13.5	7.25	48.8	2	1.038	0.386	0.417	0.991757	0.893591	0.0677454	9.31	15.64	17.91	123.5	128.1	48.4	6.84	7.94	24.98
1150672793	ADP-ribosylation factor GTPase-activating protein AGD12-like isoform X1 [Asparagus officinalis]	14.029	9	2	8	2	339	37.5	5.03	14.32	2	0.848	1.425	1.581	0.991757	0.929358	0.691804	2.9	12.51	4.05	87.7	73.2	139.1	20.88	25.32	21.99
1150681605	signal recognition particle 54 kDa protein 2 [Asparagus officinalis]	8.912	5	2	7	2	500	55.2	9.25	11.14	2	0.797	0.531	0.666	0.991757	0.934058	0.682432	12.48	6.45	41.68	129.1	112.4	58.4	47.69	28.09	54.93
1150750652	uncharacterized protein LOC109826933 [Asparagus officinalis]	5.081	5	2	5	2	321	35	4.65	12.15	2	0.966	1.22	1.255	0.991757	0.950938	0.916613	0.83	1.87	4.53	96.5	92.1	111.4	13.87	13.95	14.53
1150743126	probable E3 ubiquitin-protein ligase ARI8 isoform X1 [Asparagus officinalis]	5.077	3	2	4	2	588	67	5.17	0	2	0.626	0.472	0.724	0.991757	0.962593	0.916613	1.44	11.98	4.79	141.5	92.4	66.2	13.2	13.47	5.78
1150697814	uncharacterized protein LOC109836339 [Asparagus officinalis]	13.389	3	2	17	2	1213	134.4	5.94	14.2	2	0.855	1.145	1.153	0.991757	0.966238	0.963126	7.93	3.83	28.37	95.6	95	109.4	27.15	27.57	62.07
1150673205	UBP1-associated protein 2C [Asparagus officinalis]	8.064	6	2	4	2	374	38.2	9.67	7.62	2	0.659	0.521	1.071	0.991757	0.966238	0.994916	0.48	9.4	7.76	137.7	85.5	76.8	9.87	23.83	12.89
1150707845	uncharacterized protein LOC109840396 [Asparagus officinalis]	5.977	6	2	7	2	418	46.7	6.99	4.97	2	0.607	0.467	0.715	0.991757	0.973844	0.916613	27.46	11.28	4.34	140.8	92.8	66.4	17.24	40.69	29.53
1150710780	protein TOC75-3, chloroplastic-like [Asparagus officinalis]	3.463	3	2	2	2	756	83.3	8.38	1.61	2	0.871	1.041	1.107	0.991757	0.974473	0.975441	14.53	23.21	4.12	111.8	89.3	98.9	29.12	13.53	18.57
P48485	Serine/threonine-protein phosphatase PP1 isozyme 5 OS=Arabidopsis thaliana OX=3702 GN=TOPP5 PE=1 SV=1	14.825	8	2	5	1	312	35.5	5.26	9.43	2	0.645	0.581	0.823	0.991757	0.98003	0.946676	29.74	0.29	20.92	133.9	88.3	77.8	20.61	17.41	24.48
1150739988	probable calcium-binding protein CML18 [Asparagus officinalis]	23.904	17	2	20	2	162	18.2	4.96	45.92	2	1.042	0.941	0.91	0.991757	0.986255	0.964057	1.14	18.5	4.97	104.5	109.9	85.6	8.06	11.83	19.87
1150741561	outer envelope pore protein 16, chloroplastic [Asparagus officinalis]	13.377	19	2	29	2	146	15.4	9.06	72.32	2	1.006	0.81	0.823	0.991757	0.999557	0.916613	32.12	32.77	3.23	107.9	105.4	86.7	23.99	7.87	5.87
1150689645	protein CURVATURE THYLAKOID 1D, chloroplastic-like [Asparagus officinalis]	28.158	16	2	47	2	186	20.4	7.43	150.72	2	1.009	0.839	0.924	0.991757	0.999557	0.972144	5.07	34.28	16.55	108.7	104.5	86.8	2.98	17.57	34.68
1150734771	transcription elongation factor SPT6 homolog [Asparagus officinalis]	9.279	2	2	4	2	1602	181.6	5.15	2.02	2	0.752	0.288	0.383	0.993913	0.889116		26.13	48.11	7.7	152.1	95.4	52.4	26.8	23.65	46.64
1150700991	pyruvate kinase isozyme G, chloroplastic [Asparagus officinalis]	6.798	8	2	2	1	465	51.3	6.15	2.2	2	0.632	0.335	0.529	0.993913	0.912418	0.667747	11.35	81.79	47.68	131.4	110.2	58.3	18.3	25.56	63.93
1150732194	LOW QUALITY PROTEIN: uncharacterized protein LOC109851226 [Asparagus officinalis]	10.549	3	2	7	2	956	103.7	8.4	19.2	2	0.641	0.338	0.534	0.993913	0.919359	0.589201	11.1	9.16	44.84	154.8	92.4	52.8	6.65	23.51	17.39
1150742478	LOW QUALITY PROTEIN: GEM-like protein 5 [Asparagus officinalis]	23.915	7	2	46	2	203	22.3	9.01	165.75	2	0.921	1.149	1.146	0.993913	0.935141	0.939537	12.12	11.7	38.15	98.4	90.6	111	7.54	24.46	21.87
1150733056	endoglucanase 10-like [Asparagus officinalis]	10.543	4	2	18	2	618	69	9.03	42.37	2	0.695	1.267	1.823	0.993913	0.942726	0.503836	10.83	32.48	22.48	114.1	73	112.9	36.3	38.11	56.52
1150708167	tetraspanin-8-like [Asparagus officinalis]	9.341	7	2	4	2	273	30.6	8.54	4.37	2	0.656	1.259	2.774	0.993913	0.950938	0.155546	40.01	23.69	1.58	102.9	67.5	129.5	6.92	34.49	41.8
1150683171	Golgi to ER traffic protein 4 homolog [Asparagus officinalis]	9.72	7	2	4	2	329	37.3	6.2	6.86	2	0.66	0.383	0.638	0.993913	0.950938	0.856289	7.61	7.61	2.78	145.7	96.2	58.2	18.22	10.49	14.41
1150712694	LOW QUALITY PROTEIN: cytochrome P450 CYP73A100-like, partial [Asparagus officinalis]	16.455	6	2	5	2	515	58.8	7.91	12.1	2	0.627	0.436	0.648	0.993913	0.953788		43.89	18.44	10.24	126.4	110.6	63	95.46	23.81	18.17
P20858	ATP synthase subunit beta, chloroplastic OS=Triticum aestivum OX=4565 GN=atpB PE=3 SV=1	12.34	9	2	13	1	498	53.8	5.16	36.51	2	0.774	0.994	0.892	0.993913	0.957023	0.988297	48.51	4.61	114.82	109	98	93	16.55	55.74	42.41
1150743483	ras GTPase-activating protein-binding protein 1-like [Asparagus officinalis]	5.746	8	2	3	2	471	50.4	5.99	2.11	2	0.639	0.442	0.691	0.993913	0.961383		6.76	49.35	40.73	144.2	92.1	63.7	21.48	11.72	19.36
1150724634	probable apyrase 1 [Asparagus officinalis]	14.087	6	2	4	2	471	50.9	6.65	3.68	2	0.826	1.11	1.344	0.993913	0.966238	0.916613	65.3	23.71	31.15	111.4	81.4	107.1	42.52	16.49	22.13
1150699808	cysteine--tRNA ligase, chloroplastic/mitochondrial-like [Asparagus officinalis]	6.981	4	2	9	2	503	57.8	6.25	10.87	2	0.663	0.928	1.479	0.993913	0.976046	0.833308	16.85	20.03	7.84	115.5	74.4	110.1	9.22	10.52	28.27
1150748717	ferredoxin, root R-B2-like [Asparagus officinalis]	28.23	20	2	63	2	152	16.1	5.11	165.64	2	0.959	0.767	0.888	0.993913	0.983932	0.916613	3.54	4.48	16.15	109.4	101	89.6	16.93	13.67	37.31
1150714445	vacuolar protein sorting-associated protein 2 homolog 1 [Asparagus officinalis]	8.766	14	2	6	1	223	24.9	5.62	10.56	2	0.647	0.781	1.464	0.993913	0.985953	0.851273	27.34	61.88	48.51	122.2	89.6	88.2	13.27	54.8	75.17
1150712168	ubiquitin receptor RAD23b-like [Asparagus officinalis]	8.499	7	2	6	1	353	37.7	4.64	7.13	2	0.857	0.575	0.765	0.993913	0.986191	0.916613	5.86	7.21	10.25	121.7	104.3	74	19.62	9.09	8.02
1150690749	LOW QUALITY PROTEIN: protein CROWDED NUCLEI 4-like [Asparagus officinalis]	8.381	2	2	5	2	1055	122.4	5.53	6.79	2	0.832	0.746	0.715	0.993913	0.987245	0.916613	6.85	3.61	29.94	114.4	104.6	81	8.57	10.88	32.87
1150748892	B-cell receptor-associated protein 31-like [Asparagus officinalis]	9.777	11	2	6	2	215	24.4	9.35	9.98	2	0.797	0.667	0.985	0.993913	0.990002	0.995088	17.31	73.04	48.47	126.5	100.8	72.7	14.57	28.39	69.36
1150679111	AP-2 complex subunit alpha-2-like [Asparagus officinalis]	12.695	3	2	5	2	1014	113.3	6.21	6.68	2	0.827	0.78	0.898	0.993913	0.999557	0.961683	16.84	4.28	11.16	123.1	94.8	82.1	15.34	11.44	19.01
1150725465	guanine nucleotide exchange factor SPIKE 1 isoform X1 [Asparagus officinalis]	11.639	1	2	16	2	1840	207.8	6.18	16.57	2	0.67	0.73	1.091	0.993913	0.999557	0.984408	3.99	0.91	4.92	125.7	82	92.3	25.49	23.15	25.65
1150740980	chorismate mutase 3, chloroplastic-like [Asparagus officinalis]	6.54	7	2	4	2	308	35.5	7.09	3.93	2	0.67	0.745	1.112	0.993913	0.999557	0.986186	46.21	43.45	3.78	131.7	79.7	88.6	6.55	53.68	32.11
1150743351	LOW QUALITY PROTEIN: very-long-chain 3-oxoacyl-CoA reductase 1-like [Asparagus officinalis]	7.104	7	2	7	2	320	35.8	9.6	16.8	2	0.762	2.528	3.149	0.994359	0.800987	0.0417175	40.31	45.1	53.25	71.8	55	173.2	33.07	4.7	41.01
Q9FLU9	Beta-glucosidase 31 OS=Arabidopsis thaliana OX=3702 GN=BGLU31 PE=2 SV=1	3.736	2	2	30	1	534	61.8	6.27	28.26	2	0.946	1.162	1.55	0.994359	0.965327	0.36626	10.58	2.57	0.35	83.3	84.8	131.9	39.18	22.42	32.44
1150716761	fructose-1,6-bisphosphatase, chloroplastic isoform X1 [Asparagus officinalis]	9.609	7	2	3	2	373	40.9	7.3	6.31	2	0.68	0.947	1.668	0.994359	0.966238	0.696826	9.64	32.61	43.56	116.5	73.1	110.3	19.41	32.7	13.53
1150741144	branched-chain-amino-acid aminotransferase 5, chloroplastic-like [Asparagus officinalis]	8.361	8	2	6	2	410	44.8	6.68	4.51	2	0.797	0.894	0.924	0.994359	0.975448	0.990161	3.26	20.14	22.22	107.6	96.2	96.2	11.3	23.06	28.65
1150728988	biotin carboxyl carrier protein of acetyl-CoA carboxylase 1, chloroplastic-like [Asparagus officinalis]	4.552	5	2	2	2	272	28.7	6.92	4.39	2	0.676	0.532	0.86	0.994359	0.975919	0.960679	4.13	8.48	9.89	135.1	93.4	71.5	2.84	13.66	9.97
1150716102	dynein light chain 1, cytoplasmic [Asparagus officinalis]	10.953	15	2	19	2	150	16.8	7.42	24.47	2	0.772	0.714	0.925	0.994359	0.999557	0.986947	6.99	32.11	41.68	120.7	93.1	86.2	37.18	31	59.48
1150728713	uncharacterized protein LOC109849702 [Asparagus officinalis]	25.773	20	2	7	2	217	23.7	8.87	19.21	2	0.848	0.498	0.715	0.995704	0.947345	0.843396	32.43	5.85	20.71	136.8	95.2	68	13.44	34.82	52.5
1150672361	outer envelope pore protein 16-3, chloroplastic/mitochondrial-like [Asparagus officinalis]	10.244	16	2	3	1	158	16.8	9.2	4.47	2	0.904	0.866	0.919	0.995781	0.986	0.985688	11.88	18.89	0.17	108.3	97.9	93.8	6.37	18.91	18
1150745962	basic leucine zipper and W2 domain-containing protein 2-like [Asparagus officinalis]	11.174	8	2	5	2	411	47.1	5.38	15.14	2	0.767	0.328	1.072	0.996275	0.908881	0.990806	14.13	1.24	41	156	90.5	53.5	16.85	45.28	85.83
1150726536	syntaxin-52-like isoform X1 [Asparagus officinalis]	12.155	12	2	31	2	230	25.7	8.87	54.31	2	0.962	1.019	1.122	0.996275	0.982884	0.955876	8.25	14.57	8.3	97	96	107	5.66	12.25	14.52
1150676885	altered inheritance of mitochondria protein 32 [Asparagus officinalis]	12.405	7	2	20	2	421	45.7	6.21	51.39	2	0.825	0.901	1.245	0.996275	0.983932	0.916613	13.04	16.94	0.19	105.2	95.2	99.6	12.68	19.08	15.73
1150677204	bet1-like SNARE 1-1 [Asparagus officinalis]	11.206	23	2	5	2	120	13.8	6.7	13.32	2	0.697	0.425	0.664	0.996716	0.949627	0.855441	6.9	28.18	44.05	145.3	92.9	61.8	10.48	14.98	59.27
1150708146	LOW QUALITY PROTEIN: protein CYPRO4-like [Asparagus officinalis]	5.72	4	2	9	1	633	70.3	6.51	5.48	2	0.68	0.421	0.63	0.996716	0.957023	0.786185	45.76	47.63	2.76	143.5	96.7	59.8	22.94	62.64	57.33
1150736827	erlin-2-B isoform X1 [Asparagus officinalis]	5.738	6	2	5	2	355	40.8	6.4	6.19	2	0.696	0.613	1.588	0.996716	0.98377	0.801183	3.7	14.05	62.49	132.3	86.7	81	8.09	33.61	71.89
1150725068	peroxisomal adenine nucleotide carrier 1-like [Asparagus officinalis]	16.186	9	2	27	2	327	35.5	9.76	78.17	2	0.942	0.947	0.968	0.996716	0.983932	0.990161	0.12	7.96	13.36	108.1	101.8	90.1	11.4	9.58	14.13
1150699724	probable tocopherol O-methyltransferase, chloroplastic [Asparagus officinalis]	6.037	8	2	6	2	303	33.2	5.54	1.86	2	0.769	0.657	1.052	0.996716	0.992701	0.990161	21.82	40.26	16.83	126	96.9	77.2	11.85	29.74	46.19
1150743101	xyloglucan endotransglucosylase/hydrolase protein A-like [Asparagus officinalis]	6.451	7	2	11	2	292	33.6	8.38	20.53	2	0.867	0.777	0.914	0.996716	0.997147	0.972144	12.95	9.68	3.07	114.3	97	88.7	11.05	14.38	43.92
1150676983	agmatine deiminase [Asparagus officinalis]	7.982	9	2	6	2	385	43.1	5.24	7.35	2	0.773	0.803	1.16	0.997206	0.997147	0.957433	24.98	12.57	14.32	114.2	94.9	90.9	6.25	21.53	19.73
1150747800	coatomer subunit zeta-2-like [Asparagus officinalis]	14.364	20	2	12	1	177	19.6	4.78	26.38	2	0.71	0.468	0.931	0.997414	0.973311	0.995088	1.41	59.96	62.35	151.4	89.9	58.7	15.44	27.01	68.94
1150710078	uncharacterized protein LOC109841191 [Asparagus officinalis]	4.197	3	2	5	2	539	59.8	8.44	1.63	2	0.918	0.682	0.715	0.997414	0.980673	0.801183	18.97	5.92	2.94	117.6	95.6	86.8	11.98	17.01	14.45
1150682675	mitochondrial import inner membrane translocase subunit Tim9 [Asparagus officinalis]	17.886	29	2	36	2	93	10.9	6.11	35.98	2	0.93	0.955	1.026	0.997415	0.983932	0.995088	3.94	26.76	26.01	104	96.7	99.3	9.05	12.3	16.54
1150722648	peptidyl-prolyl cis-trans isomerase CYP22, partial [Asparagus officinalis]	20.358	12	2	39	2	198	21.1	8.25	87.26	2	0.936	0.892	0.982	0.997415	0.986255	0.995088	6.29	4.39	4.46	110.3	94.3	95.4	17.93	22.45	17.2
1150673221	uncharacterized protein LOC109830026, partial [Asparagus officinalis]	8.51	5	2	9	1	515	57.7	8.13	14.29	2	0.701	0.705	1.007	0.997789	0.999557	0.995088	38	28.92	11.28	124.7	87.4	88	18.72	48.95	39.41
1150725802	LOW QUALITY PROTEIN: AMP deaminase-like [Asparagus officinalis]	9.565	3	2	13	2	852	96.5	6.98	7.57	2	0.728	0.356	0.773	0.998714	0.92641	0.916613	25.39	26.37	58.78	144	104.8	51.3	15.99	48.38	86.08
1150742460	RNA-binding protein 12-like [Asparagus officinalis]	9.891	6	2	37	2	297	33	8.12	101.72	2	0.89	0.276	0.353	0.998897	0.818237	0.0250796	8.65	12.8	38.53	139.7	124.8	35.5	13.78	22.08	37.58
1150718019	uncharacterized protein LOC109844848 [Asparagus officinalis]	8.474	10	2	7	2	221	23.3	5.57	17.16	2	0.89	1.351	1.124	0.999387	0.931107	0.959933	38.55	10.05	12.5	97.6	81.1	121.3	19.28	25.18	22.66
1150721066	senescence-specific cysteine protease SAG39-like [Asparagus officinalis]	17.338	20	2	17	2	159	17.9	8.9	28.73	2	0.722	0.246	0.353	0.999709	0.87681	0.131143	25.52	29.57	51.28	184.1	85.8	30.1	32.52	26.93	53.57
1150726951	uncharacterized protein LOC109848965 [Asparagus officinalis]	38.102	7	3	51	3	215	24.3	5.39	147.22	3	16.394	24.887	1.518	1.20598e-05	1.84379e-06	0.461335	73.79	69.34	2.57	9.4	116.6	174	49.58	22.37	20.51
1150682520	60S ribosomal protein L35a-1-like [Asparagus officinalis]	35.918	29	3	58	2	112	12.7	10.42	197.09	3	0.046	0.061	1.71	0.00127747	0.0429578	0.670268	48.11	32.88	4.56	270.4	12.4	17.2	2.83	49.86	48.23
1150718233	uncharacterized protein LOC109844935 [Asparagus officinalis]	17.415	31	3	21	3	112	11.5	9.94	44.59	3	0.092	0.031	0.447	0.00433132	1.22817e-05	0.34791	29.41	26.28	46.04	274.1	16.3	9.5	47.4	44.92	15.31
Q9SZX9	60S ribosomal protein L9-2 OS=Arabidopsis thaliana OX=3702 GN=RPL9D PE=2 SV=1	24.194	15	3	29	2	194	22	9.5	81.07	3	11.064	11.725	1.06	0.010216	0.0391253	0.983859	48.87	85.4	13.7	12.6	139.5	147.9	47.87	32.58	53.74
O24150	Caffeoyl-CoA O-methyltransferase 3 OS=Nicotiana tabacum OX=4097 GN=CCOAOMT3 PE=2 SV=2	27.832	15	3	19	2	242	27.2	5.49	69.52	3	0.085	0.068	0.797	0.0465957	0.128419	0.953876	24.47	0.71	19.2	257.7	24.9	17.4	40.28	8.24	19.41
P25469	Histone H2A.1 OS=Solanum lycopersicum OX=4081 PE=2 SV=1	8.974	13	3	34	1	146	15.3	10.55	71.21	3	8.86	8.324	1.086	0.0557375	0.312766	0.990161	132.43	103.81	19.99	17.9	135.2	146.9	62	63.72	32.33
1150686495	LOW QUALITY PROTEIN: multiple organellar RNA editing factor 8, chloroplastic/mitochondrial-like [Asparagus officinalis]	21.006	10	3	22	3	420	46.1	9.23	63.95	3	0.13	0.171	1.021	0.072408	0.392562	0.997328	38.19	75.68	36.2	229.4	30.4	40.2	4.12	81.24	56.58
1150730568	uncharacterized protein LOC109850470 [Asparagus officinalis]	21.653	16	3	45	1	174	18.5	9.8	103.58	3	0.079	0.055	1.395	0.102054	0.264579	0.91167	96	18.25	11.53	260.9	20.6	18.5	17.86	74.91	102.08
1150681447	uncharacterized protein LOC109829181 [Asparagus officinalis]	21.181	31	3	15	3	218	23.9	4.53	18.37	3	0.143	0.1	0.622	0.133136	0.219601	0.65745	1.42	19.34	57.38	239.4	34.1	26.5	10.63	64.72	17.9
1150716361	THO complex subunit 4D-like isoform X1 [Asparagus officinalis]	10.085	14	3	13	3	272	29.4	11.28	13.2	3	4.383	4.383	1	0.142122	0.392562	0.995088	16.71	76.95	72.23	25.3	130.1	144.6	16.14	19.28	66.78
1150714237	calreticulin-like [Asparagus officinalis]	15.941	12	3	11	2	412	47.6	4.88	25.67	3	5.885	15.318	2.701	0.191044	0.0759905	0.160486	52.47	5.61	28.96	13.2	77.5	209.3	82.31	6.3	19.32
O23628	Histone H2A variant 1 OS=Arabidopsis thaliana OX=3702 GN=H2AV PE=1 SV=1	19.87	24	3	43	2	136	14.5	10.32	94.78	3	0.211	0.266	0.79	0.222552	0.642963	0.916613	10.32	25.62	70.59	204.7	40.4	54.9	9.74	61.92	38.14
1150705829	LOW QUALITY PROTEIN: uncharacterized protein LOC109839585 [Asparagus officinalis]	42.642	25	3	25	3	241	25.9	6.7	68.46	3	0.191	0.138	1.034	0.241872	0.282493	0.995088	91.73	72.77	25.32	225.9	43	31.1	12.1	72.29	92.49
1150730245	germin-like protein 5-1 [Asparagus officinalis]	19.57	17	3	19	3	219	23.2	8.75	27.83	3	0.196	0.119	0.604	0.307063	0.339001	0.799107	24.2	3.5	33.1	228.5	44.6	26.9	6.71	20.03	28.93
1150723352	phospho-2-dehydro-3-deoxyheptonate aldolase 1, chloroplastic-like [Asparagus officinalis]	7.245	7	3	10	1	412	46.2	6.9	17.57	3	0.113	0.087	0.709	0.318973	0.437685		16.62	49.8	5.51	262	22.6	15.4	41.07	32.93	62.44
1150733229	aldose 1-epimerase [Asparagus officinalis]	8.542	15	3	4	3	362	39.7	7.93	2.26	3	3.962	5.412	1.495	0.330067	0.453223	0.701087	13.52	0.81	11.76	26.8	107.4	165.8	13.21	2.26	15.19
1150746061	protein DEK-like isoform X1 [Asparagus officinalis]	9.82	7	3	13	3	541	60.6	6.38	16.63	3	4.001	4.56	1.14	0.347947	0.634641	0.957611	40.16	34.7	7.49	28.4	126	145.5	44.19	10.79	7.77
O82059	Glucose-6-phosphate isomerase, cytosolic OS=Spinacia oleracea OX=3562 GN=PGIC PE=2 SV=2	15.723	10	3	26	1	566	62.1	6.83	61.34	3	4.326	3.248	0.851	0.350766	0.784855	0.936291	35.31	33.28	19.7	30.8	128.8	140.3	79.76	16.77	53.7
1150675604	beta-glucosidase 12-like [Asparagus officinalis]	6.987	7	3	15	3	407	46.5	9.01	25.19	3	3.338	0.968	0.312	0.353498	0.98003	5.30114e-06	71.19	15.91	10.92	55.1	183.9	61	31.32	27.55	11.25
1150734495	probable histone-arginine methyltransferase CARM1 [Asparagus officinalis]	12.715	8	3	9	3	539	59.7	5.38	15.14	3	3.665	3.864	1.054	0.388288	0.483653	0.986947	10.17	41.18	1.69	35.2	128.9	135.9	17.36	41.24	47.63
1150692687	LOW QUALITY PROTEIN: expansin-A10-like [Asparagus officinalis]	22.397	15	3	12	3	257	27.6	7.9	29.02	3	0.208	0.12	0.601	0.394929	0.307601	0.797385	6.87	43.94	6.64	219.7	48	32.3	40.44	13.22	22.38
1150718564	proteasome subunit alpha type-4 [Asparagus officinalis]	36.178	19	3	37	1	250	27.3	5.52	137.16	3	0.145	0.109	0.661	0.398336	0.510299	0.888839	70.45	45.49	57.8	235	39.4	25.6	15.24	61.16	61.29
1150744833	uncharacterized protein At2g27730, mitochondrial [Asparagus officinalis]	7.378	17	3	27	3	95	10.6	9.26	47.54	3	2.554	1.866	0.685	0.404575	0.841338	0.394135	9.85	34.39	35.41	61.3	144.5	94.2	11.79	6.59	44.12
1150670529	uncharacterized protein LOC109828005 [Asparagus officinalis]	23.154	13	3	52	1	282	31.6	6.14	143.95	3	0.134	0.145	1.353	0.41238	0.706926		25.05	29.51	96.2	228.3	30.5	41.2	24.85	50.81	47.48
Q9FE01	L-ascorbate peroxidase 2, cytosolic OS=Oryza sativa subsp. japonica OX=39947 GN=APX2 PE=1 SV=1	12.69	11	3	62	1	251	27.1	5.36	158.04	3	0.263	0.283	1.078	0.416193	0.704635	0.986947	28.59	40.63	4.04	187.9	49.4	62.7	41	20.51	12.61
1150708041	4-coumarate--CoA ligase 1-like [Asparagus officinalis]	16.698	22	3	14	3	212	23.4	5.5	33.67	3	0.229	0.254	1.053	0.420958	0.745742	0.995088	4.56	1.4	3.57	200	48.7	51.3	34.76	31.13	27.63
1150672122	uncharacterized protein OsI_027940-like [Asparagus officinalis]	30.301	22	3	26	2	218	23.3	4.49	71.05	3	0.154	0.188	0.731	0.431241	0.794318	0.916613	13.66	46.02	13.59	222.1	36.3	41.7	11.11	44.13	31.41
1150677961	uncharacterized protein LOC109820829 [Asparagus officinalis]	19.38	16	3	42	1	172	18.7	9.45	86.29	3	0.154	0.314	2.042	0.434222	0.905257	0.360035	35.64	34.48	0.94	207.9	30.3	61.8	6.12	107.81	92.14
1150743797	abscisic stress-ripening protein 2-like [Asparagus officinalis]	42.92	27	3	19	3	94	11	7.06	67.66	3	0.261	0.124	0.417	0.505862	0.216091	0.150484	18.59	41.46	19.99	220.5	51.2	28.3	7.97	24.99	38.3
1150710828	calcium-transporting ATPase 1, endoplasmic reticulum-type-like [Asparagus officinalis]	28.234	6	3	39	1	911	99.7	5.54	71.53	3	0.152	0.063	0.307	0.518811	0.332842	0.123562	38.56	39.4	67.71	250.1	34.1	15.8	8.98	29.88	53.21
1150689604	phosphoribosylaminoimidazole-succinocarboxamide synthase, chloroplastic-like [Asparagus officinalis]	13.362	9	3	7	3	391	44.4	5.86	15	3	0.195	0.258	1.34	0.518811	0.875739	0.916613	42.3	2.2	39.47	209.7	38.6	51.7	7.14	36.04	23.49
1150715909	cinnamoyl-CoA reductase 1-like isoform X1 [Asparagus officinalis]	12.702	10	3	25	3	343	37.5	6.86	31.85	3	0.264	0.309	1.129	0.545415	0.817316	0.980672	5.44	0.92	13.77	195.7	51.6	52.7	31.08	35.08	34.94
1150747634	10 kDa chaperonin 1, chloroplastic-like [Asparagus officinalis]	11.359	27	3	24	3	129	13.9	7.28	46.19	3	2.155	2.21	1.025	0.585165	0.642963	0.999335	19.2	23.73	5.2	56.7	115.4	127.9	13.15	7.92	12
1150730649	alanine--glyoxylate aminotransferase 2 homolog 3, mitochondrial-like [Asparagus officinalis]	13.47	5	3	30	2	473	51.5	7.5	70.31	3	0.149	0.186	1.251	0.611383	0.841783	0.918093	52.05	16.3	40.16	240.4	22.5	37.1	28.22	88.35	36.01
1150749287	uncharacterized protein LOC109826193 [Asparagus officinalis]	24.513	27	3	44	3	173	18.7	4.89	104.85	3	2.102	3.66	1.726	0.617549	0.176482	0.204229	7.14	23.04	8.85	45.6	95.7	158.7	13.85	3.77	25.44
O23657	Ras-related protein RABC1 OS=Arabidopsis thaliana OX=3702 GN=RABC1 PE=1 SV=1	8.894	15	3	14	1	212	23.5	5.81	20.68	3	3.057	2.645	0.451	0.628701	0.721767	0.357083	75.87	48.06	89.9	59.8	182.8	57.4	62.94	22.15	87.14
1150730849	cationic peroxidase 1-like [Asparagus officinalis]	6.332	10	3	10	2	319	33.9	7.9	14.25	3	2.748	4.259	1.968	0.631101	0.422913	0.0730922	12.97	19.78	4.01	36.9	101.4	161.7	40.14	16.04	18.71
1150734960	LOW QUALITY PROTEIN: RNA-binding protein 1-like [Asparagus officinalis]	17.51	20	3	10	3	214	23.2	9.13	20.73	3	0.274	0.227	0.827	0.631101	0.744953	0.953735	17.15	8.86	23.31	201.4	55.7	42.9	7.23	22.58	8.76
Q9M2F1	40S ribosomal protein S27-2 OS=Arabidopsis thaliana OX=3702 GN=RPS27B PE=2 SV=2	20.638	26	3	62	3	86	9.6	8.72	143.06	3	1.912	2.846	1.197	0.655998	0.363329	0.916613	1.6	3.94	38.16	54.4	111.8	133.8	14.14	5.26	35.47
1150730587	LOW QUALITY PROTEIN: calcium-transporting ATPase 1, endoplasmic reticulum-type-like [Asparagus officinalis]	28.25	5	3	37	1	1056	115.5	5.38	71.7	3	0.194	0.191	0.984	0.670431	0.799919	0.99536	1.05	23.32	35.19	214.4	41.4	44.2	20.34	24.31	47.27
1150740665	eukaryotic translation initiation factor 3 subunit J-A-like [Asparagus officinalis]	12.962	16	3	19	1	230	25.8	5	16.17	3	0.168	0.173	0.684	0.674254	0.80828		48.8	18.04	83.33	217.4	44.9	37.7	17.01	37.95	35.69
1150726140	tryptophan--tRNA ligase, cytoplasmic-like [Asparagus officinalis]	9.801	10	3	12	3	400	45.9	6.74	19.83	3	2.46	2.847	1.104	0.712763	0.773999	0.972144	9.4	2.11	7.19	48	116.8	135.2	3.08	58.97	69.66
1150747079	uncharacterized protein At5g48480 [Asparagus officinalis]	10.307	23	3	18	3	159	16.5	4.77	39.93	3	0.337	0.176	0.545	0.732461	0.421909	0.45394	25.55	25.12	5.93	204.1	63	33	32.41	50.93	66.81
1150725839	calmodulin-like [Asparagus officinalis]	9.393	25	3	37	1	107	12.1	4.44	60.86	3	0.312	0.073	0.234	0.739472	0.0429578	0.000201358	3.96	137.61	137.31	234.2	53.4	12.5	19.51	25.51	156.15
1150712940	quinone oxidoreductase-like protein 2 homolog [Asparagus officinalis]	12.728	13	3	12	3	346	36.8	9.03	26.11	3	0.329	0.279	0.848	0.741477	0.811786	0.957433	5.94	57.01	41.13	193.6	57.6	48.8	7.1	9.39	45.82
1150677716	protein odr-4 homolog [Asparagus officinalis]	4.747	7	3	5	3	492	54	5.88	1.89	3	2.329	4.927	2.115	0.748311	0.344009	0.121767	3.8	41.53	36.79	36.3	84.6	179	1.57	23.85	74.03
Q8H1B3	Heat shock 70 kDa protein BIP3 OS=Arabidopsis thaliana OX=3702 GN=BIP3 PE=1 SV=1	12.669	5	3	22	2	675	75.1	5.05	43.9	3	2.409	3.602	1.495	0.748311	0.531626	0.52726	13.19	33.41	13.78	41.4	96.4	162.2	18.87	21.84	25.01
1150699162	glycine-rich RNA-binding protein RZ1A [Asparagus officinalis]	19.51	20	3	30	3	210	22.4	8.66	76.57	3	1.801	1.687	0.937	0.749753	0.829575	0.953876	12.35	39.87	28.42	66.9	120.4	112.8	20.91	11.22	12.55
1150693338	lamin-like protein [Asparagus officinalis]	11.02	19	3	36	3	161	18	9.1	79.1	3	1.852	2.199	0.798	0.753781	0.736937	0.791857	51.53	26.37	8.87	58.5	113	128.5	29.82	27.65	23.83
1150685979	serine carboxypeptidase 1 [Asparagus officinalis]	24.64	7	3	26	3	496	55.1	6.28	58.76	3	0.373	0.23	0.617	0.781431	0.538725	0.521438	3.23	3.86	15.26	187.8	71.7	40.5	14.13	17.54	15.99
1150672846	glucan endo-1,3-beta-glucosidase 6-like [Asparagus officinalis]	7.361	7	3	7	3	476	51.9	5.78	8.13	3	1.807	1.769	0.928	0.785974	0.794318	0.953876	11.09	12.79	7.75	66.9	120.9	112.2	9.9	6.87	17.88
1150715642	annexin D8-like [Asparagus officinalis]	23.288	12	3	8	3	318	36.6	6.9	15.91	3	0.276	0.086	0.42	0.786762	0.363329	0.387893	50.24	62.6	91.32	232.2	47.8	20.1	33.22	72.78	55
1150730109	vacuolar protein sorting-associated protein 2 homolog 1-like [Asparagus officinalis]	15.299	20	3	12	2	223	24.8	5.62	27.03	3	0.253	0.278	1.323	0.795276	0.901572	0.916613	32.67	16.3	52.11	187.2	60.7	52.1	21.36	31.94	62.94
1150729764	proliferating cell nuclear antigen [Asparagus officinalis]	19.762	17	3	26	1	264	29.4	4.89	36.87	3	0.212	0.167	0.757	0.803841	0.794318		52.65	5.88	6.74	216.2	45.8	38	11.12	75.72	11.52
1150731289	mannose-specific lectin-like [Asparagus officinalis]	77.518	40	3	94	3	151	16.3	4.59	381.46	3	1.8	0.736	0.409	0.803841	0.98003	0.00214758	18.5	10.64	47.69	89.9	141.6	68.6	24.3	13.7	67.49
1150706836	mannosylglycoprotein endo-beta-mannosidase isoform X1 [Asparagus officinalis]	15.481	4	3	21	3	1045	118.1	6.73	42.7	3	2.15	2.76	1.272	0.804137	0.761217	0.916613	33.32	31.66	1.37	47.8	117	135.2	59.44	16.22	6.46
1150709547	cinnamoyl-CoA reductase 2-like [Asparagus officinalis]	12.501	12	3	11	2	324	35.9	5.78	15.7	3	1.946	3.046	1.831	0.825417	0.794318	0.429323	1.54	6.8	17.6	51.3	99.7	149	17.11	25.05	30.28
P81624	Acyl-CoA-binding protein 1 (Fragment) OS=Digitalis lanata OX=49450 PE=1 SV=2	36.141	83	3	125	2	30	3.4	4.81	331.72	3	1.741	2.852	1.63	0.825896	0.38784	0.314009	0.77	13.47	12.77	48.7	83.6	167.8	18.33	18.55	13.89
1150726840	GDP-mannose 4,6 dehydratase 1-like [Asparagus officinalis]	14.524	12	3	17	3	352	39.6	6.29	21.35	3	1.885	1.753	0.937	0.837268	0.905257	0.990161	35.45	1.08	36.78	73.9	96.6	129.5	23.6	37.23	22.17
1150705333	beta-hexosaminidase 3 [Asparagus officinalis]	8.985	8	3	11	3	540	59.5	6.58	25.52	3	0.386	0.131	0.339	0.852226	0.392083	0.0881443	21.2	30.83	7.86	199.9	78.2	21.9	16.02	17.62	43.44
1150699385	ubiquitin-conjugating enzyme E2 variant 1D [Asparagus officinalis]	23.421	32	3	52	1	146	16.6	6.54	136.38	3	0.245	0.485	1.79	0.852226	0.974473	0.605771	30.96	1.64	17.87	167.4	50.5	82.2	26.7	22.63	8.89
1150692730	NAP1-related protein 2-like isoform X1 [Asparagus officinalis]	25.19	23	3	13	2	253	29.3	4.35	40.29	3	0.294	0.314	0.914	0.854828	0.905257	0.990161	4.19	6.29	2.08	186.6	54.8	58.6	3.95	16.7	15.36
Q84XG9	IAA-amino acid hydrolase ILR1-like 1 OS=Oryza sativa subsp. indica OX=39946 GN=ILL1 PE=2 SV=1	19.87	7	3	41	1	442	47.2	6.04	91.16	3	0.249	0.169	0.638	0.858091	0.732269	0.876706	90.01	86.37	62.08	194.4	50.3	55.2	39.25	44.37	72.21
1150726144	cytochrome c oxidase subunit 6b-1-like [Asparagus officinalis]	13.828	26	3	37	1	167	18.8	4.25	86.46	3	0.357	0.28	1.864	0.859117	0.841571	0.534659	20.55	95.77	3.47	188	62.8	49.2	4.15	73.57	97.17
1150734775	40S ribosomal protein S12-like [Asparagus officinalis]	28.393	28	3	63	3	137	14.7	5.31	186.3	3	0.479	0.563	1.505	0.86649	0.9214	0.450813	17.13	25.24	23.59	149.7	73.2	77.1	5.73	22.53	39.19
1150721160	probable polygalacturonase At1g80170 [Asparagus officinalis]	26.461	12	3	12	3	449	48.6	7.81	36.79	3	0.432	0.187	0.429	0.872815	0.462083	0.163358	20.59	1.25	19.17	191.6	72.6	35.8	47.56	38.45	40.17
1150747858	LOW QUALITY PROTEIN: superoxide dismutase [Cu-Zn], chloroplastic-like [Asparagus officinalis]	69.509	30	3	45	1	213	21.7	6.32	215	3	0.405	0.332	1.019	0.872815	0.860724	0.999335	42.31	4.87	17.87	177.2	64	58.8	28.19	40.99	11
1150688816	probable methyltransferase PMT2 [Asparagus officinalis]	15.039	6	3	17	3	616	69.5	7.34	30.54	3	1.845	2.047	1.387	0.872815	0.893591	0.915971	23.44	2.8	8.84	49.4	105.5	145.1	25.62	33.49	27.35
1150715588	protein WVD2-like 4 isoform X1 [Asparagus officinalis]	17.625	8	3	24	3	452	48	9.42	36.52	3	1.781	1.728	0.997	0.872815	0.912104	0.995088	2.97	54.72	40.94	65.6	117.3	117	10.78	10.47	30.38
1150693011	cytochrome c oxidase subunit 6b-3-like [Asparagus officinalis]	11.992	41	3	31	1	134	15.1	4.27	63.6	3	0.256	0.409	1.785	0.879435	0.954977		74.11	110.08	81.98	203.3	13.7	83.1	66.25	121.87	57.26
1150726330	probable ureidoglycolate hydrolase [Asparagus officinalis]	19.018	7	3	35	3	473	51.1	5.81	88	3	0.444	0.407	0.975	0.880738	0.857781	0.990161	2.3	0.88	12.9	158	71.3	70.6	5.53	1.71	15.03
Q9T074	Phosphoenolpyruvate carboxykinase (ATP) OS=Arabidopsis thaliana OX=3702 GN=PCKA PE=1 SV=1	11.371	6	3	10	1	671	73.4	7.08	8.9	3	0.264	0.249	0.938	0.880738	0.897349	0.995825	0.79	53.69	54.19	193.1	51	55.8	12.9	50.21	76.92
1150677703	phosphomannomutase-like [Asparagus officinalis]	15.051	30	3	9	1	184	21.5	5.82	18.24	3	0.26	0.346	1.438	0.880738	0.92641		15.93	10.99	17.52	200.4	38.2	61.4	21.84	26.76	12.89
O48551	Proteasome subunit alpha type-6 OS=Glycine max OX=3847 GN=PAA1 PE=2 SV=2	28.52	15	3	29	2	246	27.4	6.23	71.68	3	0.425	0.055	0.131	0.880831	0.0170403	6.28539e-08	7.37	9.72	43.09	207.3	80.6	12.1	15.65	10.54	26.28
1150719663	LOW QUALITY PROTEIN: syntaxin-71-like [Asparagus officinalis]	8.768	12	3	10	2	269	30.3	5.67	19.76	3	1.741	10.94	1.46	0.887105	0.222148	0.859906	90.7	86.33	18.17	12.9	116.7	170.4	116.92	79.52	13.15
1150725251	LOW QUALITY PROTEIN: cystathionine gamma-synthase 1, chloroplastic-like [Asparagus officinalis]	8.124	7	3	23	2	503	55	6.58	35.17	3	1.729	2.032	1.145	0.887105	0.875739	0.952817	14.15	17.68	21.96	66.2	103.5	130.2	13.43	26.44	12.43
O22263	Protein disulfide-isomerase like 2-1 OS=Arabidopsis thaliana OX=3702 GN=PDIL2-1 PE=2 SV=1	5.979	4	3	37	1	361	39.5	6.06	73.17	3	1.618	1.618	1.031	0.892541	0.891446	0.995088	17.69	29.6	4.49	69.6	115.2	115.2	4.89	15.65	18.38
1150709520	AT-hook motif nuclear-localized protein 10-like [Asparagus officinalis]	16.364	23	3	25	3	193	19.3	8.84	46.73	3	0.453	0.317	0.699	0.898021	0.818237	0.812407	7.24	17.5	43.72	169.5	76.8	53.7	3	16.41	47.72
1150682510	LIM domain-containing protein WLIM2b-like [Asparagus officinalis]	9.26	17	3	15	3	189	20.9	8.76	22.95	3	1.845	0.851	0.598	0.900326	0.996327	0.357083	33.88	2.95	0.02	81.5	150.5	68	45.35	24.5	27.82
1150744070	phosphoribosylamine--glycine ligase [Asparagus officinalis]	13.124	9	3	19	3	527	56	5.55	25.6	3	1.806	1.497	0.841	0.901207	0.919199	0.925183	4.3	6.51	2.15	71.7	124	104.3	12.64	16.58	8.13
1150729296	LOW QUALITY PROTEIN: putative vesicle-associated membrane protein 726 [Asparagus officinalis]	11.828	10	3	29	3	212	24.1	8.59	46.98	3	1.44	1.149	1.265	0.901207	0.934163	0.863256	76.6	14.36	26.41	83.3	119.9	96.8	5.76	82.26	34.93
Q65CJ7	Hydroxyphenylpyruvate reductase OS=Plectranthus scutellarioides OX=4142 GN=HPPR PE=1 SV=2	7.356	8	3	46	1	313	34.1	5.47	63.96	3	0.409	0.162	0.359	0.904355	0.671538	0.154543	26.44	20.11	4.46	191.2	77.8	31	1.89	36.41	28.99
1150668999	cytochrome b5-like [Asparagus officinalis]	24.359	21	3	28	3	141	15.1	5.2	15.43	3	0.47	0.344	0.734	0.912556	0.80828	0.804322	0.47	13.35	13.87	157.1	77.3	65.6	12.82	10.23	25.88
1150703658	4-coumarate--CoA ligase-like 1, partial [Asparagus officinalis]	21.896	14	3	12	3	336	36.6	9.25	27.44	3	0.333	0.35	0.99	0.912612	0.913884	0.995088	20.61	10.44	2.39	188	56.7	55.2	21.92	6.53	10.58
1150701410	LOW QUALITY PROTEIN: 2-isopropylmalate synthase A-like [Asparagus officinalis]	8.176	5	3	7	3	545	58.7	7.37	6.84	3	1.757	3.134	1.942	0.917842	0.614333	0.0387881	16.92	5.3	7.72	53.2	82.7	164.1	10.59	28.75	5.11
1150718266	L-Ala-D/L-amino acid epimerase isoform X1 [Asparagus officinalis]	17.849	17	3	21	3	289	31.6	7.05	47.22	3	0.463	0.389	0.956	0.925948	0.893591	0.995088	26.26	20.92	20.15	164.6	70.6	64.8	15.19	13.45	19.62
B3VMC0	Betaine aldehyde dehydrogenase 2 OS=Oryza sativa subsp. indica OX=39946 GN=BADH2 PE=2 SV=1	15.852	9	3	6	2	503	54.6	5.45	15	3	1.544	1.488	1.021	0.925948	0.929358	0.999544	8.21	40.11	13.58	76	110.8	113.1	22.38	11.72	12.66
1150747073	mitochondrial import receptor subunit TOM20-like [Asparagus officinalis]	31.522	23	3	19	3	202	22.3	5.66	55.22	3	0.471	0.414	0.893	0.928738	0.893591	0.961473	19.6	10.27	2.37	153.7	77.5	68.8	7.56	18.39	8.33
1150679843	serine/threonine-protein phosphatase PP2A-1 catalytic subunit-like [Asparagus officinalis]	14.961	13	3	17	3	306	35.1	5.08	34.13	3	0.447	0.361	0.807	0.931074	0.901572	0.918093	23.35	0.67	2.67	158.5	84	57.4	10.25	22.34	19.78
1150690879	protein AUXIN SIGNALING F-BOX 3-like [Asparagus officinalis]	19.52	7	3	20	3	583	65.3	5.64	41.71	3	1.698	1.628	0.959	0.931248	0.903873	0.990161	3.28	5.2	8.19	69.3	117.7	112.9	15.65	9.64	20.39
1150731916	pathogenesis-related protein 1-like [Asparagus officinalis]	22.135	28	3	7	2	153	16.1	5.24	16.32	3	1.725	4.335	3.35	0.931663	0.642963	0.0151153	15.49	45.86	77.1	47.7	82.4	169.9	11.97	29.57	61.46
1150737412	alpha-mannosidase 2 [Asparagus officinalis]	5.929	3	3	8	3	1090	125.4	6.62	4.46	3	1.684	3.025	1.607	0.931663	0.653193	0.446467	14.9	53.35	30.32	50	84.2	165.7	5.82	16.59	48.36
1150668503	uncharacterized protein LOC109827032 [Asparagus officinalis]	19.238	32	3	46	3	99	10.5	5.36	91.91	3	0.474	0.403	1.222	0.931663	0.860724	0.916613	9.34	7.34	49.88	161.4	76.5	62.1	8.21	28.3	60.95
1150679542	plastidic ATP/ADP-transporter-like [Asparagus officinalis]	25.404	5	3	58	3	533	58.2	9.13	167.13	3	1.486	1.544	1.054	0.931663	0.903873	0.990161	1.15	3.35	15.51	73.6	110.2	116.2	9.02	13.38	2.79
1150698508	callose synthase 9 [Asparagus officinalis]	9.082	1	3	18	1	1810	208.2	8.53	34.66	3	0.311	0.535	2.343	0.936163	0.983932	0.247259	55.93	39.47	1.57	153	65.1	81.9	23.68	42.15	64.43
1150688934	eukaryotic translation initiation factor 3 subunit J-like isoform X1 [Asparagus officinalis]	15.059	22	3	31	1	229	25.7	4.96	6.29	3	1.649	2.413	1.366	0.937836	0.864568	0.916613	33.25	4.49	10.52	68.5	102.7	128.8	29.67	9.07	24.96
1150699202	uncharacterized protein LOC109836833 [Asparagus officinalis]	14.403	17	3	26	3	191	20.4	8.73	40.51	3	0.445	0.369	0.829	0.937836	0.910432	0.942205	2.29	17.47	32.2	173.1	68.3	58.6	20.45	24.41	14.48
1150682691	oxysterol-binding protein-related protein 3A-like [Asparagus officinalis]	9.06	6	3	29	1	453	51.5	5.35	59.76	3	1.502	0.981	0.612	0.939943	0.98003	0.630518	0.17	44.26	50.84	84	133.7	82.4	16.11	17.41	84.89
P52588	Protein disulfide-isomerase OS=Zea mays OX=4577 GN=PDI PE=2 SV=1	10.756	2	3	25	1	513	57.1	5.41	19.88	3	1.349	13.615	3.183	0.940913	0.0328889	0.0584364	23.57	2.06	103.64	23.3	74.1	202.6	67.98	67.2	63.27
1150724055	probable NADH dehydrogenase [ubiquinone] 1 alpha subcomplex subunit 12 [Asparagus officinalis]	14.088	13	3	24	3	244	28.1	9.14	56.01	3	0.497	0.257	0.605	0.940913	0.548274	0.345565	5.45	1.48	13.88	167.6	82.9	49.5	13.36	7.69	8.72
1150679414	uncharacterized protein LOC109826129 [Asparagus officinalis]	25.408	12	3	18	3	431	48.2	8.34	50.06	3	1.467	2.967	1.161	0.940913	0.721767	0.946676	21.11	18.26	18.99	53.7	86.8	159.4	9.1	47.49	25
1150699954	alpha,alpha-trehalose-phosphate synthase [UDP-forming] 5-like [Asparagus officinalis]	17.219	5	3	18	3	864	97.9	5.8	39.15	3	0.468	0.262	0.561	0.940913	0.831895	0.568501	39.58	65.73	21.41	173.4	81.1	45.5	9.45	26.36	51.17
1150676308	uncharacterized protein LOC109847110 [Asparagus officinalis]	10.94	13	3	21	3	300	33.4	7.2	37.7	3	1.534	1.93	1.102	0.940913	0.87569	0.972144	14.96	29.7	18.7	71.5	109.8	118.7	24.3	4.19	10.91
1150729090	ribosome-recycling factor, chloroplastic [Asparagus officinalis]	12.858	15	3	10	3	277	31	9.57	20.53	3	1.557	1.664	1.077	0.940913	0.901572	0.986947	18.1	7.56	6.38	70.1	110.7	119.2	10.69	4.78	5.57
1150711796	multiprotein-bridging factor 1a-like, partial [Asparagus officinalis]	19.285	32	3	18	2	135	15	10.2	36.3	3	1.425	1.692	1.089	0.940913	0.917884	0.990161	26.59	25.87	13.45	69.2	117.9	112.9	24.1	14.31	13.5
Q1W377	Phosphomannomutase OS=Solanum lycopersicum OX=4081 PE=2 SV=1	16.449	15	3	9	1	252	28.5	6.24	20.51	3	1.595	1.448	0.852	0.940913	0.930055	0.953735	4.45	13.27	23.55	57	90.9	152.1	87.58	81.61	68.71
1150698259	probable methionine--tRNA ligase [Asparagus officinalis]	12.77	5	3	25	2	789	88.6	6.73	50.23	3	0.489	0.585	0.972	0.940913	0.952505	0.995088	29.38	0.25	12.41	143.4	79.4	77.2	19.54	34.86	13.58
1150691146	vacuolar protein sorting-associated protein 35B-like [Asparagus officinalis]	12.595	6	3	20	3	791	89.2	5.45	24.66	3	0.364	0.444	1.269	0.940913	0.959309	0.916613	5.77	31.15	30.33	164	63.1	72.9	18.31	10.72	21.05
1150706394	protein PHLOEM PROTEIN 2-LIKE A1-like [Asparagus officinalis]	13.735	12	3	13	3	192	22.1	4.88	18.79	3	0.337	0.967	3.153	0.940913	0.98003	0.0415538	3.48	12.11	26.42	134.1	46	119.9	11.62	17.1	94.51
1150732121	phenylalanine--tRNA ligase beta subunit, cytoplasmic [Asparagus officinalis]	15.488	8	3	4	3	603	68.1	6.01	7.03	3	0.456	0.747	1.638	0.940913	0.999557	0.605771	14.41	45.83	22.59	151.3	62.2	86.4	23.51	26.77	47.43
1150724854	ubiquitin domain-containing protein DSK2b-like [Asparagus officinalis]	36.45	10	3	32	3	539	57.4	4.97	105.05	3	0.527	0.38	0.815	0.941433	0.871727	0.916613	12.33	37.27	32.87	160.3	78.7	61	9.05	17.62	45.28
P49316	Catalase isozyme 2 OS=Nicotiana plumbaginifolia OX=4092 GN=CAT2 PE=2 SV=1	14.089	5	3	51	1	492	56.9	7.23	120.09	3	1.293	2.821	2.181	0.944295	0.381154	0.0206679	8.67	29.54	1.54	59.5	84.2	156.2	17.33	18.92	20.44
1150726474	uncharacterized protein LOC109848808 isoform X1 [Asparagus officinalis]	10.692	8	3	32	3	391	43.4	6.02	43.78	3	1.522	1.827	1.099	0.945828	0.877007	0.964057	17.19	12.56	29.69	64.1	112.4	123.5	11.08	29.29	8.51
1150736252	ADP-ribosylation factor-like protein 8a [Asparagus officinalis]	14.398	23	3	21	3	188	21	7.83	75	3	1.524	1.831	1.222	0.945828	0.893591	0.889966	7.26	0.18	2.65	71.8	96.8	131.4	9.14	18.03	12.37
1150707210	LOW QUALITY PROTEIN: ATP-dependent 6-phosphofructokinase 2-like [Asparagus officinalis]	12.92	12	3	33	3	262	29	7.21	75.57	3	1.271	1.253	0.979	0.945828	0.910432	0.988297	13.86	12.88	13.06	83.6	113.9	102.5	8.82	16.23	10.57
1150715166	pyrophosphate--fructose 6-phosphate 1-phosphotransferase subunit alpha [Asparagus officinalis]	11.046	5	3	20	1	617	67.2	7.02	29.19	3	0.376	1.274	3.393	0.947558	0.950938	0.0417175	80.66	52.87	50.9	132	38.2	129.8	17.75	90.29	51.29
1150710748	transmembrane 9 superfamily member 12-like [Asparagus officinalis]	23.123	7	3	16	1	663	74.7	6.79	53.23	3	1.377	0.662	0.481	0.948496	0.999557	0.497984	5.54	18.67	13.83	107.1	130.2	62.7	11.76	49.77	59.65
1150718141	LOW QUALITY PROTEIN: aminomethyltransferase, mitochondrial [Asparagus officinalis]	15.304	9	3	19	3	359	39	8.38	53.97	3	0.532	0.29	0.689	0.948801	0.704393	0.688251	2.47	32.78	8.41	164.4	87.9	47.7	2.66	17.14	39.82
1150691259	uncharacterized protein LOC109833371 [Asparagus officinalis]	24.504	17	3	81	3	191	21.1	5.34	181.5	3	1.342	0.497	0.433	0.948801	0.901572	0.0051738	11.45	28.2	25.18	110.1	135.2	54.7	13.35	11.15	70.63
1150685023	60S ribosomal protein L30-like [Asparagus officinalis]	16.845	32	3	24	3	112	12.3	9.72	49.2	3	0.544	0.436	0.828	0.948801	0.910432	0.924379	25.59	23.73	4.96	152.2	82.1	65.8	2.36	20.62	50.26
1150749800	subtilisin-like protease SBT1.4 [Asparagus officinalis]	10.104	6	3	24	1	452	49.4	8.69	51.24	3	1.375	5.265	3.829	0.949282	0.471166	0.00153442	64.47	95.07	21.32	28	51.7	220.3	26.78	68.66	84.81
1150708450	LOW QUALITY PROTEIN: profilin-like [Asparagus officinalis]	23.31	39	3	35	2	125	13.6	4.63	82.6	3	1.379	2.592	1.775	0.949282	0.712609	0.119992	36.6	26.33	8.72	60.4	83.3	156.2	10.83	16.96	29.83
1150680192	embryo-specific protein ATS3B-like [Asparagus officinalis]	32.717	28	3	33	2	176	19.7	7.65	69.95	3	0.514	0.241	0.552	0.949282	0.769681	0.476176	15.2	68.41	43.2	170.4	88.6	41	21.03	23.55	41.49
1150696736	heparanase-like protein 3 [Asparagus officinalis]	25.874	10	3	24	3	537	59.2	6.95	45.19	3	0.53	0.248	0.474	0.949282	0.777699	0.24743	33.39	78.88	2.01	150.7	101.7	47.6	14.76	43.5	61.9
1150687434	uncharacterized protein LOC109831840 isoform X1 [Asparagus officinalis]	28.34	20	3	30	3	316	36	5.59	74.27	3	0.566	0.318	0.591	0.949282	0.829575	0.529887	7.53	55.21	65.55	161.5	87	51.4	15.13	26.85	75.87
1150748638	uncharacterized protein LOC109825949 [Asparagus officinalis]	17.413	6	3	19	3	745	82.8	5.12	46.73	3	0.541	0.353	0.657	0.949282	0.875739	0.719289	20.96	41.43	0.96	166.4	74.9	58.7	23.79	13.44	10.94
1150676304	signal recognition particle receptor subunit beta-like [Asparagus officinalis]	28.9	11	3	59	3	255	28.2	8.07	165.91	3	1.227	1.598	1.25	0.949282	0.875739	0.863256	16.51	11.64	21.48	78.2	96.8	125	4.5	8.28	10.59
1150719964	40S ribosomal protein SA-like [Asparagus officinalis]	21.071	23	3	44	2	210	22.7	4.41	78.02	3	0.575	0.379	0.883	0.949282	0.875739	0.961747	13.56	9.45	26.27	151.1	86.8	62.1	11.3	12.25	28.58
1150735556	cullin-1-like [Asparagus officinalis]	14.253	5	3	25	3	744	86.8	7.15	39.29	3	1.398	1.773	1.28	0.949282	0.893591	0.874731	1.34	15.24	5.27	70.4	107.4	122.2	8.93	10.52	11.66
1150722856	60S ribosomal protein L12-like [Asparagus officinalis]	26.641	30	3	99	1	135	14.4	5.6	274.83	3	1.203	1.49	1.239	0.949282	0.893591	0.889459	22.78	24.68	1.47	85.3	96.5	118.3	12.6	15.11	26.37
1150688672	LOW QUALITY PROTEIN: UBP1-associated protein 2B-like, partial [Asparagus officinalis]	15.625	14	3	13	3	302	32.5	8.68	21.04	3	0.51	0.314	0.791	0.949282	0.905257	0.916613	5.12	30.2	35.52	164.1	84.4	51.4	0.56	15.05	39.51
1150729309	transmembrane emp24 domain-containing protein p24beta3 [Asparagus officinalis]	22.415	25	3	43	3	216	24.7	7.36	89.21	3	1.147	1.321	1.163	0.949282	0.905257	0.920702	3.55	1.38	2.24	88.5	106.2	105.3	11.26	13.88	11.75
1150707897	uncharacterized protein LOC109840411 isoform X1 [Asparagus officinalis]	12.977	3	3	15	3	1089	123.3	6.14	15.66	3	1.173	1.535	1.436	0.949282	0.919199	0.801183	10.66	8.31	28.91	82.2	91.6	126.2	3.94	10.13	14.13
P09843	Cytochrome b OS=Oenothera berteroana OX=3950 GN=MT-CYB PE=2 SV=4	14.88	8	3	66	3	394	44.3	6.99	83.32	3	0.571	0.521	1.238	0.949282	0.919199	0.859906	37.42	29.15	3.94	155.4	74.3	70.3	11.09	39.24	47.27
1150691763	transmembrane 9 superfamily member 3-like [Asparagus officinalis]	8.172	6	3	9	3	591	67.7	6.89	15.31	3	1.282	1.6	1.329	0.949282	0.919199	0.916613	65.96	60.64	9	53	94.7	152.4	86.3	38.13	38.03
1150672644	probable alpha,alpha-trehalose-phosphate synthase [UDP-forming] 7 [Asparagus officinalis]	22.13	5	3	47	1	887	99.1	5.66	105.01	3	1.261	1.527	1.211	0.949282	0.919199	0.918093	17.15	0.69	17.11	78	102.3	119.7	9.5	19.66	9.83
1150725607	uncharacterized protein LOC109848514 [Asparagus officinalis]	17.728	14	3	15	3	370	41.5	9.72	40.21	3	1.365	1.446	1.087	0.949282	0.919359	0.961683	9.26	1.5	5.2	74.9	108.5	116.6	7.04	15.88	7.62
1150672365	uncharacterized protein At2g17340-like isoform X1 [Asparagus officinalis]	10.504	6	3	6	3	376	41.9	4.93	10.47	3	1.188	1.582	1.403	0.949282	0.9214	0.916613	4.05	7.91	11.26	78.9	96.3	124.8	8.93	71.14	17.96
1150692075	GRF1-interacting factor 2-like [Asparagus officinalis]	19.075	18	3	29	3	213	22.8	6.64	48.55	3	1.205	1.534	1.274	0.949282	0.921516	0.918093	10	23.78	12.17	88.5	97.5	114	23.28	20.24	16.99
1150709001	persulfide dioxygenase ETHE1 homolog, mitochondrial-like isoform X1 [Asparagus officinalis]	25.052	17	3	10	3	308	33.6	8.12	33.7	3	0.604	0.502	0.879	0.949282	0.92384	0.953876	0.76	12.99	5.11	144.8	82.6	72.6	31.89	32.59	22.42
1150741845	uncharacterized protein LOC109823134 [Asparagus officinalis]	11.667	6	3	16	1	543	61.6	9.04	24.69	3	1.395	1.41	1.004	0.949282	0.92384	0.998638	8.94	1.04	7.44	77.3	107.8	114.9	3.94	11.87	11.35
1150709137	uncharacterized protein At1g03900 [Asparagus officinalis]	17.405	14	3	39	3	287	32.4	5.05	60.28	3	1.26	1.433	1.14	0.949282	0.92641	0.957395	4.34	15.77	4.53	88.1	99	112.9	10.15	9.31	16.53
1150725676	nitrogen regulatory protein P-II homolog [Asparagus officinalis]	15.338	18	3	39	3	199	21.6	9.6	94.58	3	1.442	1.441	1.053	0.949282	0.92641	0.986947	6.04	7.94	10.81	85.1	110.9	104	13.08	13.28	11.28
1150693956	cytochrome c oxidase subunit 6a, mitochondrial-like [Asparagus officinalis]	57.558	32	3	82	3	101	11.4	9.31	255.45	3	0.6	0.542	0.819	0.949282	0.927637	0.859906	12.46	15.88	28.27	135.9	90.2	73.9	13.59	14.95	9.68
1150693629	transmembrane protein 184C-like [Asparagus officinalis]	17.176	11	3	65	3	293	33.8	8.32	131.14	3	1.241	1.245	1.08	0.949282	0.931854	0.973008	9.83	15	10.51	86.1	106.8	107.1	6.49	24.15	18.48
1150735001	histidinol-phosphate aminotransferase, chloroplastic-like [Asparagus officinalis]	12.377	12	3	7	3	411	46	7.62	13.88	3	1.303	1.36	0.979	0.949282	0.937322	0.995088	12.99	9.18	11.4	83.8	109.2	107	7.16	4.79	19.01
Q9AXJ4	Eukaryotic translation initiation factor 5A OS=Manihot esculenta OX=3983 PE=2 SV=2	38.709	42	3	30	1	160	17.6	6.2	94.12	3	0.375	0.379	0.746	0.949282	0.941365		78.14	30.7	34.94	181.4	67.9	50.7	31.07	44.73	21.16
1150693314	phosphoserine phosphatase, chloroplastic-like [Asparagus officinalis]	17.675	15	3	29	3	295	32	7.23	58.67	3	1.397	1.207	0.899	0.949282	0.947233	0.958103	12.06	6.46	6.1	83	116.4	100.6	3.84	15.05	19.42
1150684856	uncharacterized protein LOC109830654 [Asparagus officinalis]	16.561	44	3	43	3	79	8.7	8.79	97.01	3	0.579	0.596	1.041	0.949282	0.948511	0.995088	13.26	32.47	1.65	143.3	77.2	79.5	14.65	27.26	40.34
1150684202	ACT domain-containing protein ACR12 [Asparagus officinalis]	15.96	14	3	32	3	293	31.9	5.24	30.51	3	0.463	0.437	1.215	0.949282	0.949627	0.952824	6.43	20.66	7.4	157.2	74.1	68.7	3.29	15.44	22.44
1150716555	protein transport protein Sec24-like At3g07100 [Asparagus officinalis]	10.77	3	3	10	1	1028	113.1	7.9	19.98	3	0.4	0.411	0.658	0.949282	0.949627		57.76	6.89	1.28	168.2	71.7	60.1	12.63	40.12	47.59
1150742678	protein TPLATE isoform X1 [Asparagus officinalis]	16.646	4	3	9	3	1067	118.9	6.09	10.38	3	0.383	0.375	1.044	0.949282	0.953788	0.98762	8.05	11.08	9.22	170.7	65.3	64	9.15	17.95	26.98
Q0JM17	DEAD-box ATP-dependent RNA helicase 56 OS=Oryza sativa subsp. japonica OX=39947 GN=AIP1 PE=1 SV=2	14.44	10	3	12	1	432	48.6	5.72	24.51	3	0.383	0.463	1.207	0.949282	0.962593	0.932464	38.72	55.8	20.97	150.2	67.9	82	12.18	24.66	39.64
1150705875	endo-1,3;1,4-beta-D-glucanase-like [Asparagus officinalis]	17.85	15	3	35	3	244	26.3	5.52	91.62	3	1.234	1.082	0.903	0.949282	0.962593	0.935052	10.01	5.97	4.34	85.7	114.1	100.1	7.79	12.73	13.47
1150709729	plant UBX domain-containing protein 4-like [Asparagus officinalis]	7.609	15	3	11	3	305	33	6.33	13.03	3	0.455	0.488	0.843	0.949282	0.962593	0.953477	72.71	22.58	31.81	185.2	55.4	59.4	22.39	74.55	50.83
1150690786	uncharacterized protein LOC109833207 [Asparagus officinalis]	9.978	13	3	6	3	477	52.6	4.35	4.08	3	0.397	0.476	1.153	0.949282	0.962593	0.957433	67.2	5.86	61.96	161.8	64.2	74	30.25	23.34	25.96
1150714280	acyl-coenzyme A oxidase 4, peroxisomal-like [Asparagus officinalis]	15.32	10	3	6	2	438	47.7	8.72	8.92	3	0.405	0.508	1.424	0.949282	0.965327	0.916613	25.87	40.51	101.8	162.8	52.4	84.8	13.49	52.92	62.38
Q01402	Nucleoside diphosphate kinase 2, chloroplastic OS=Spinacia oleracea OX=3562 GN=NDPK2 PE=1 SV=1	9.69	15	3	22	1	233	26.1	8.92	53.25	3	0.498	1.045	12.076	0.949282	0.966238	1.33997e-10	136.4	32.52	17.61	37.8	22	240.2	125.35	135.68	68.13
1150724552	aquaporin PIP2-7 [Asparagus officinalis]	32.735	32	3	32	2	198	21	9.67	103.04	3	0.558	0.666	1.301	0.949282	0.966238	0.871312	15.31	20.48	12.23	146.2	61.3	92.5	33.27	25.46	21.2
1150748616	basic transcription factor 3 [Asparagus officinalis]	17.466	20	3	23	2	174	18.3	8.85	94.9	3	1.445	1.077	0.582	0.949282	0.971773	0.157987	17.8	46.41	6.51	84.4	138.4	77.2	15.52	14.63	44.7
1150740879	uncharacterized protein LOC109822722 isoform X1 [Asparagus officinalis]	6.911	8	3	6	3	652	72.8	5.24	3.67	3	0.408	0.479	0.768	0.949282	0.973844	0.932464	5.13	39.3	51.17	152.3	68	79.7	8.93	38.35	49.43
1150747302	LOW QUALITY PROTEIN: splicing factor SF3a60 homolog [Asparagus officinalis]	15.206	10	3	12	3	502	58.8	5.31	13.41	3	0.458	0.536	1.158	0.949282	0.974473	0.957433	29.54	1.53	15.66	145.9	67.6	86.5	20.36	14.28	18.56
1150728060	multiple organellar RNA editing factor 3, mitochondrial-like [Asparagus officinalis]	15.231	25	3	31	3	235	26.6	8.9	6.59	3	1.192	1.028	0.882	0.949282	0.976046	0.962595	6.23	3.38	9.74	92.5	110.2	97.3	31.35	18.25	28
1150711814	golgin candidate 5 [Asparagus officinalis]	16.244	5	3	18	3	1065	120	4.96	26.19	3	0.404	0.583	1.442	0.949282	0.982884	0.860635	11.37	11.88	36.81	153.7	50.6	95.8	21.04	18.67	32.11
1150747316	monosaccharide-sensing protein 2-like [Asparagus officinalis]	25.524	7	3	22	3	729	78.3	5.31	33.29	3	0.649	0.916	1.143	0.949282	0.984893	0.946676	8.41	18.08	45.31	126.7	85.1	88.2	16.09	32.69	36.11
1150680802	protein transport protein Sec24-like At3g07100 [Asparagus officinalis]	11.992	3	3	9	1	1031	113	7.55	14.25	3	0.432	0.698	1.617	0.949282	0.992518		0.48	18.98	115.21	141.4	59.8	98.7	8.06	52.53	66.46
1150723586	LOW QUALITY PROTEIN: glucan endo-1,3-beta-glucosidase 7-like [Asparagus officinalis]	15.214	9	3	11	1	415	44.9	6.8	12.6	3	0.439	0.834	1.763	0.949282	0.992701	0.664845	10.63	25.31	44.33	136.7	63.1	100.3	25.98	20.32	31.99
P27990	Phenylalanine ammonia-lyase OS=Medicago sativa OX=3879 PE=2 SV=1	13.832	7	3	42	1	725	78.8	6.39	77.98	3	1.333	0.841	0.723	0.949282	0.999557	0.568501	2.25	17.02	33.65	98.5	116.9	84.5	22.83	21.25	44.08
1150737072	uncharacterized protein LOC109820713 isoform X1 [Asparagus officinalis]	24.119	16	3	23	3	376	41.9	8.28	45.13	3	1.451	0.831	0.669	0.949282	0.999557	0.597978	0.39	17.7	24.86	91.2	125.1	83.7	29.49	20.3	9.52
1150680608	uncharacterized protein LOC109828931 isoform X1 [Asparagus officinalis]	12.003	31	3	18	3	124	14.1	6.32	14.03	3	1.173	0.792	0.653	0.949282	0.999557	0.73359	5.03	37.88	15.71	105	112.1	82.9	26.36	28.56	18.79
1150745863	beta-galactosidase 15 isoform X1 [Asparagus officinalis]	8.741	3	3	8	3	892	98.6	7.9	12.62	3	0.517	0.766	1.567	0.949282	0.999557	0.746361	25.93	38.11	16.49	125.9	78.1	96	11.01	23.58	24.41
P00072	Cytochrome c OS=Fagopyrum esculentum OX=3617 PE=1 SV=1	16.871	31	3	35	1	111	12.1	9.54	75.93	3	0.424	0.622	1.264	0.949282	0.999557	0.916613	40.66	23.38	102.52	155.5	70.5	74.1	16.82	58.12	60.62
1150723456	probable 2-oxoglutarate-dependent dioxygenase AOP1 [Asparagus officinalis]	33.054	10	3	31	3	430	48.1	7.75	71.05	3	0.589	0.542	0.92	0.951302	0.934163	0.962595	8.11	12.78	19.81	138.7	79.1	82.2	14.5	13.03	18.88
1150691481	serine/threonine-protein kinase 4-like isoform X1 [Asparagus officinalis]	14.61	5	3	16	3	731	79.7	6.95	36.28	3	1.237	1.561	1.184	0.953804	0.9214	0.959629	26.81	12.45	9.75	79	97.7	123.3	11.41	16.75	7.01
1150696442	protein IQ-DOMAIN 31-like [Asparagus officinalis]	13.943	10	3	5	3	565	61.9	9.73	10.33	3	0.465	0.409	0.951	0.953804	0.938634	0.998638	7.29	30.22	14.09	159.3	77.9	62.7	23.78	25.66	17.16
1150725447	NADH dehydrogenase [ubiquinone] 1 alpha subcomplex subunit 8-B-like [Asparagus officinalis]	13.533	23	3	47	3	110	12.1	7.9	81.75	3	1.282	1.222	0.963	0.953804	0.950938	0.993437	4.69	6.2	1.47	85.6	109.7	104.7	7.54	12.02	0.83
1150723284	beta-hexosaminidase 1 [Asparagus officinalis]	25.184	8	3	13	3	540	60.5	6.04	32.45	3	0.619	0.346	0.67	0.955272	0.831895	0.645935	29.52	11.03	42.03	141.6	94.9	63.6	16.37	12.83	42.62
1150733987	superoxide dismutase [Cu-Zn] 2-like [Asparagus officinalis]	75.558	21	3	257	1	151	15.1	6.05	945.23	3	1.187	1.247	1.05	0.955272	0.92641	0.995088	6.24	1.72	7.64	86.5	105.7	107.8	7.69	3.44	9.1
1150707143	LOW QUALITY PROTEIN: proteasome activator subunit 4 [Asparagus officinalis]	14.262	2	3	16	3	1803	202.2	7.4	34.51	3	0.638	0.608	0.977	0.955272	0.966091	0.995088	33.98	4.41	0.99	134.5	83.5	82.1	7.7	32.24	16.4
1150723308	3-dehydroquinate synthase, chloroplastic [Asparagus officinalis]	17.732	9	3	34	3	449	49.2	6.8	85.76	3	0.633	0.637	1.003	0.955272	0.966091	0.999335	5.8	3.68	3.22	130.3	85.6	84	9.19	12.62	10.05
1150743860	LETM1 and EF-hand domain-containing protein 1, mitochondrial-like [Asparagus officinalis]	7.301	4	3	6	1	744	84.4	6.09	3.96	3	1.126	0.973	0.867	0.955386	0.98003	0.964057	3.41	0.43	2.99	96.7	108.9	94.4	16.82	9.23	60.23
1150695685	secretory carrier-associated membrane protein 1-like [Asparagus officinalis]	27.195	21	3	25	3	256	28.8	8.13	60.41	3	0.636	0.492	0.894	0.95583	0.919359	0.960679	7.78	2.13	22.97	141	89.7	69.4	11.14	21.3	42.27
1150700883	probable ADP-ribosylation factor GTPase-activating protein AGD8 [Asparagus officinalis]	18.496	9	3	34	1	396	42.8	9.03	47.88	3	0.452	0.217	0.479	0.958943	0.829768	0.55734	9.41	3.8	14.1	197.7	59.4	42.8	25.57	34.42	36.49
1150683982	dirigent protein 22-like [Asparagus officinalis]	26.769	23	3	55	3	186	20.5	9.54	102.19	3	0.681	0.635	0.949	0.958943	0.953788	0.961473	2.86	15.58	15.91	128.8	89.4	81.8	12.88	9.62	24.75
Q2MIH8	Acetyl-coenzyme A carboxylase carboxyl transferase subunit beta, chloroplastic OS=Solanum bulbocastanum OX=147425 GN=accD PE=3 SV=2	11.205	6	3	11	1	490	55.4	5.21	13.42	3	1.042	1.986	2.22	0.959365	0.794318	0.356741	11.37	14.05	20.87	80.3	68.2	151.5	24.43	35.25	17.98
1150695731	LOW QUALITY PROTEIN: glycine-rich RNA-binding protein 7-like [Asparagus officinalis]	12.751	24	3	36	1	135	13.9	5.94	82.46	3	1.152	1.831	1.589	0.959365	0.892683	0.52726	23.19	33.66	8.78	71.3	95.2	133.4	38.27	28.37	25.57
1150675891	protein MEMO1 [Asparagus officinalis]	13.67	13	3	16	3	291	32.6	7.12	34.18	3	0.668	0.421	0.566	0.959365	0.910432	0.4623	6.36	26.88	9.2	138.5	102.9	58.6	13.19	14.88	23.93
1150726733	exocyst complex component SEC8 isoform X1 [Asparagus officinalis]	15.45	4	3	10	3	1071	118.4	6.01	15.65	3	1.061	1.381	1.37	0.959365	0.931854	0.916613	10.5	17.75	9.5	94.2	86.8	119	15.75	16.5	7.02
1150745940	transmembrane 9 superfamily member 1-like [Asparagus officinalis]	8.397	6	3	15	1	582	66.5	7.78	15.62	3	1.139	1.165	1.094	0.959365	0.931854	0.977475	6.93	15.07	29.36	92.2	105.1	102.7	3.35	8.96	24.4
1150701396	argininosuccinate lyase, chloroplastic [Asparagus officinalis]	11.961	9	3	24	3	508	56.6	6.48	8.99	3	1.082	1.278	1.146	0.959365	0.93796	0.959933	29.44	0.16	4.53	90.1	97.5	112.4	12.58	11.05	4.24
1150696720	NEDD8 ultimate buster 1 [Asparagus officinalis]	18.804	14	3	7	3	398	44	5.38	16.16	3	0.469	0.415	0.886	0.959365	0.944327	0.990161	30.84	43.92	16.52	162.4	73	64.6	9.9	17.05	28.58
1150692426	glucan endo-1,3-beta-glucosidase 3-like [Asparagus officinalis]	31.186	11	3	33	3	497	53.2	5.21	145.91	3	0.682	0.602	0.881	0.959365	0.966238	0.954783	12.22	32.96	7.69	122.2	94.5	83.3	7.57	13.62	26.22
1150695833	ATP sulfurylase 1, chloroplastic [Asparagus officinalis]	14.69	12	3	13	1	360	40.3	6.13	12.81	3	0.968	0.526	0.695	0.959365	0.974473	0.916613	13.01	7.63	70.21	116.1	108.5	75.4	50.73	46.97	24.04
1150701905	uncharacterized protein LOC109837775 [Asparagus officinalis]	24.17	35	3	40	3	178	20.1	9.42	85.93	3	1.144	1.079	0.842	0.959365	0.975448	0.916613	4.45	16.22	23.36	95.1	105.5	99.3	7.77	12.8	15.23
1150669127	14 kDa zinc-binding protein-like [Asparagus officinalis]	22.285	23	3	47	3	184	20.4	8.41	101.45	3	0.706	0.923	1.296	0.959365	0.983932	0.833308	1.22	6.05	4.63	119.9	69.5	110.6	17.14	56.13	28.16
Q9AT63	Probable pyridoxal 5'-phosphate synthase subunit PDX1 OS=Ginkgo biloba OX=3311 GN=PDX1 PE=2 SV=1	10.298	10	3	23	1	309	32.9	6.05	35.35	3	0.555	0.693	1.068	0.959365	0.996453	0.995088	26.99	6.43	0.06	131.7	75.9	92.3	3.55	21.07	23.53
1150732585	aminoacyl tRNA synthase complex-interacting multifunctional protein 1 [Asparagus officinalis]	22.262	12	3	18	3	413	44.6	6.23	29.94	3	0.672	0.83	0.977	0.959365	0.999557	0.995088	0.24	6.91	0.19	115.5	88.7	95.8	8.89	13.23	6.34
1150693263	glycine-rich RNA-binding protein RZ1C isoform X1 [Asparagus officinalis]	13.702	17	3	7	3	248	26.6	8.82	12.1	3	1.126	1.438	1.091	0.95983	0.92384	0.972144	3.14	9.34	40.3	84.3	94.4	121.3	2.13	10.36	33.01
1150700780	LOW QUALITY PROTEIN: uncharacterized protein LOC109837389 [Asparagus officinalis]	16.987	15	3	9	3	333	35.1	7.81	13.75	3	1.028	1.634	1.565	0.960101	0.905257	0.657599	2.33	5.97	8.39	87.3	86.7	126	9.99	9.06	14.65
1150700169	4-coumarate--CoA ligase-like 1, partial [Asparagus officinalis]	10.666	8	3	15	3	422	46	9.13	13.83	3	0.677	0.48	0.72	0.961314	0.934163	0.855441	2.38	32.8	30.94	145.1	98.3	56.6	11.55	21.28	28.35
1150740106	uncharacterized protein LOC109822392 [Asparagus officinalis]	6.344	3	3	12	1	1106	122	5.35	6.8	3	0.96	1.167	1.468	0.963282	0.92641		20.55	65.65	28.83	99.3	81.3	119.4	16.7	23.28	50.26
1150698393	nicotinate phosphoribosyltransferase 1-like isoform X2 [Asparagus officinalis]	9.655	8	3	20	3	555	62.4	5.71	14.57	3	1.051	1.234	1.133	0.963282	0.934163	0.960679	5.45	9.55	15.35	94.1	98.9	107.1	19.94	8.87	15.35
1150727070	protein EARLY RESPONSIVE TO DEHYDRATION 15 [Asparagus officinalis]	24.367	21	3	42	3	170	19.4	4.96	95.53	3	1.024	1.099	1.076	0.963282	0.950938	0.981107	8.33	0.38	8.42	95.7	101	103.3	9.99	15.89	9.93
1150676031	protein FLX-like 2 [Asparagus officinalis]	16.447	11	3	10	3	449	48	7.4	12.88	3	0.648	0.556	0.857	0.964132	0.966238	0.941138	20.93	4.29	22.1	136.8	87.9	75.3	2.7	15.85	6.56
1150687110	peptide methionine sulfoxide reductase B5-like [Asparagus officinalis]	9.672	19	3	13	3	135	14.9	7.69	27.97	3	1.186	0.922	0.764	0.96425	0.986	0.833308	2.57	9.96	12.32	97	117	86	17.9	8.69	46.31
1150739741	probable 3-hydroxyisobutyrate dehydrogenase, mitochondrial [Asparagus officinalis]	29.902	15	3	40	3	347	37	8.05	97.85	3	1.089	1.098	0.925	0.964942	0.975448	0.957433	3.84	6.69	3.52	93.3	104.3	102.5	4.96	10.29	12.75
P49310	Glycine-rich RNA-binding protein GRP1A OS=Sinapis alba OX=3728 PE=2 SV=1	12.247	20	3	60	1	166	16	5.34	151.12	3	0.698	0.656	0.963	0.965972	0.966091	0.990161	3.58	26.16	10.77	133	92.8	74.2	37.75	44.91	54.84
1150735347	sucrose-phosphatase 2-like [Asparagus officinalis]	16.99	11	3	7	3	424	47.9	5.94	20.51	3	0.7	0.546	0.893	0.967259	0.958886	0.968424	36.06	50.3	1.55	133.5	93.5	72.9	3.9	34.4	35.3
1150750558	uncharacterized protein LOC109826876 [Asparagus officinalis]	9.112	24	3	7	3	114	12.6	9.76	9.46	3	0.665	0.653	1.129	0.967259	0.967513	0.925104	28.25	43.93	10.81	111.4	91.6	97	18.5	72.91	70.88
P0DKK9	40S ribosomal protein S10-2 OS=Oryza sativa subsp. japonica OX=39947 GN=RPS10-2 PE=2 SV=1	10.402	16	3	19	1	183	20.3	9.76	44.8	3	0.57	0.598	0.728	0.967259	0.98003	0.859906	3.1	19.03	45.35	129	95.4	75.6	21.44	18.18	75.58
1150744263	eukaryotic translation initiation factor 3 subunit H [Asparagus officinalis]	13.233	11	3	20	3	338	38.7	4.87	52.29	3	0.7	0.505	0.837	0.967341	0.949627	0.933925	40.15	3.85	20.01	139.8	89.7	70.6	9.88	38.77	39.38
1150734917	claspin [Asparagus officinalis]	11.011	6	3	8	3	919	99.8	7.9	9.55	3	0.543	0.619	1.14	0.967341	0.983932	0.959629	8.55	37.67	69.49	138.7	75.3	85.9	13.21	11.85	42.25
1150700499	mitochondrial import receptor subunit TOM20-like [Asparagus officinalis]	11.641	14	3	32	3	203	22.4	5.85	56.37	3	1.061	1.271	1.199	0.969603	0.930055	0.916613	7.54	7.75	13.33	93.1	88.7	118.3	14.38	16.79	20.92
1150716644	embryo-specific protein ATS3A-like [Asparagus officinalis]	33.858	24	3	15	2	166	18.8	8.65	38.02	3	1.098	0.386	0.409	0.973328	0.905257	0.0868633	4.31	15.59	48.04	124.3	124	51.8	14.03	20.03	55.33
1150736185	mitochondrial import inner membrane translocase subunit TIM50 [Asparagus officinalis]	17.969	12	3	13	3	330	37.9	9.16	26.72	3	0.746	0.701	1.055	0.973328	0.98003	0.990161	26.31	23.37	18.32	126.2	94.2	79.6	24.3	44.93	48.81
1150728232	serpin-ZX-like [Asparagus officinalis]	8.808	14	3	25	3	279	31.2	5.73	49.38	3	0.726	0.772	0.995	0.973328	0.996126	0.997328	12.81	2.63	0.96	121.5	89.4	89	23.89	8.87	5.42
1150712702	LOW QUALITY PROTEIN: protein BOBBER 1-like [Asparagus officinalis]	10.237	20	3	27	1	179	20.5	5.74	9.36	3	0.564	0.698	1.237	0.975013	0.990572	0.916613	56.1	76.89	28.32	138.1	72.4	89.5	10.72	53.08	74.96
1150704423	tubulin-folding cofactor A-like [Asparagus officinalis]	14.696	26	3	10	3	112	12.8	5.21	16.75	3	0.949	4.087	4.743	0.975174	0.69463	0.00194776	15.03	62.78	64.9	36.5	46.4	217.1	26.61	44.28	43.91
1150678332	uncharacterized protein LOC109822083 [Asparagus officinalis]	6.378	35	3	35	3	83	9	4.96	65.4	3	0.727	0.637	0.868	0.975174	0.962593	0.922029	7.32	1.43	6.21	127.2	92.5	80.3	7.2	20.22	3.8
1150684184	LOW QUALITY PROTEIN: cell division protein FtsZ homolog 2-1, chloroplastic-like [Asparagus officinalis]	7.305	9	3	5	3	473	50.1	5.66	4.02	3	0.939	0.497	0.57	0.975174	0.96313	0.635726	6.5	7.61	11.29	127.4	110	62.7	13.62	13.37	26.26
1150732354	uncharacterized protein LOC109851280 isoform X1 [Asparagus officinalis]	33.784	29	3	16	3	210	22.8	6.8	48.69	3	0.598	0.553	0.806	0.975174	0.98003	0.925104	37.99	20.49	1.51	132.2	92.9	74.9	11.12	28.91	5.48
1150691503	SH3 domain-containing protein 3 [Asparagus officinalis]	13.36	11	3	4	3	349	39.2	7.97	6.69	3	0.938	1.001	1.065	0.975174	0.98003	0.995088	8.14	0.2	4.75	99.5	98.7	101.8	13.21	29.16	12.97
1150727285	40S ribosomal protein S26-1-like [Asparagus officinalis]	19.593	38	3	42	3	125	14.3	10.9	89.93	3	1.043	0.8	0.767	0.975174	0.992226	0.714287	15.38	13.29	2.22	105.5	110	84.4	15.71	3.43	5.28
1150705502	dnaJ protein homolog 2-like [Asparagus officinalis]	23.554	8	3	39	1	424	47.1	6.84	68.31	3	0.936	0.687	0.707	0.975174	0.994502	0.892819	22.59	21.88	4.79	114.4	107	78.6	15.04	31.02	29.46
1150697636	beta-galactosidase 6 isoform X1 [Asparagus officinalis]	25.716	8	3	18	3	850	92.7	6.61	42.52	3	0.764	1.201	1.481	0.97612	0.962288	0.572996	2.74	11.13	8.1	103.6	79.1	117.4	13.8	17.59	3.48
1150708317	LOW QUALITY PROTEIN: expansin-A2-like [Asparagus officinalis]	15.914	16	3	32	3	235	25	9.22	74.65	3	0.963	1.047	0.917	0.97612	0.966238	0.952824	5.51	15.52	34.61	97	93.5	109.5	7.35	18.59	29.63
1150741995	ER membrane protein complex subunit 10, partial [Asparagus officinalis]	17.862	17	3	14	3	312	34.5	5.97	23.68	3	0.919	0.754	0.82	0.97612	0.999557	0.916613	8.93	5.27	53.14	122.8	84.6	92.6	25.28	19.03	66.64
1150669339	probable alpha,alpha-trehalose-phosphate synthase [UDP-forming] 7 [Asparagus officinalis]	9.269	5	3	11	1	885	99.3	5.87	16.42	3	0.904	1.213	1.305	0.97627	0.9214	0.916613	12.99	52.64	4.28	96.3	87	116.8	19.04	48.47	58.4
1150688885	peptidyl-prolyl cis-trans isomerase NIMA-interacting 4 [Asparagus officinalis]	22.908	30	3	19	3	152	15.9	9.5	41.31	3	0.73	0.174	0.132	0.977056	0.510386	9.26251e-09	66.35	56.4	17.05	121.6	157.7	20.7	39.67	67.37	32.45
1150686694	long chain acyl-CoA synthetase 6, peroxisomal-like [Asparagus officinalis]	12.379	8	3	15	3	611	67.2	7.33	24.97	3	0.589	0.601	1.013	0.978863	0.982884	0.995088	1.04	4.28	3.14	146.3	68.2	85.5	14.27	14.42	18.34
1150719561	glycine cleavage system H protein 2, mitochondrial-like [Asparagus officinalis]	48.941	40	3	108	3	155	16.8	5	285.3	3	0.774	0.685	0.896	0.979787	0.966238	0.921527	20.44	16.52	16.88	120.9	93.6	85.5	6.18	8.06	9.15
P34066	Proteasome subunit alpha type-1-A OS=Arabidopsis thaliana OX=3702 GN=PAF1 PE=1 SV=3	13.829	14	3	25	1	278	30.5	5.08	65.91	3	0.591	0.89	1.378	0.979824	0.98377	0.916613	1.29	5.8	18.93	121	70.9	108.2	22.68	19.04	13.84
1150700970	3-hydroxyisobutyryl-CoA hydrolase 1-like [Asparagus officinalis]	20.571	10	3	34	3	385	42.8	7.27	58.5	3	0.63	0.639	1.014	0.979824	0.985953	0.995088	27.45	3.25	2.94	131.4	84.5	84	16.48	5.11	7.76
1150723931	tetratricopeptide repeat protein 38, partial [Asparagus officinalis]	10.017	7	3	12	3	431	49.3	6.37	13.33	3	0.712	0.766	0.983	0.98023	0.999557	0.99536	12.86	14.11	26.05	116.3	92.7	91	8.54	14.12	17.46
1150750232	60S ribosomal protein L36-3-like [Asparagus officinalis]	16.809	15	3	47	3	138	16.3	10.4	115.11	3	1.027	0.537	0.514	0.980306	0.910432	0.0456664	18.04	27.23	15.12	111.5	128.5	59.9	7.95	16	31.87
1150737232	developmentally-regulated G-protein 2 [Asparagus officinalis]	22.173	6	3	14	3	723	81.9	5.91	35.23	3	0.626	0.272	0.381	0.986803	0.889056	0.174055	28.61	11.67	40.59	164	102.6	33.4	16.05	52.67	25.99
1150695079	LOW QUALITY PROTEIN: 60S ribosomal protein L27a-2-like [Asparagus officinalis]	33.141	11	3	86	3	227	24.8	10.1	201.61	3	1.02	0.99	1.141	0.986803	0.978921	0.946676	16.4	28.71	8.06	102	105.7	92.3	8.08	23.72	28.17
1150677718	thioredoxin M1, chloroplastic-like [Asparagus officinalis]	15.316	19	3	31	3	191	21.2	8.68	46.72	3	0.601	0.644	1.03	0.987812	0.983932	0.99536	15.8	5.91	16.33	125.9	85.7	88.3	9.2	26.14	13.63
1150693758	isoleucine--tRNA ligase, cytoplasmic [Asparagus officinalis]	15.591	5	3	19	3	1037	117	6.86	32.27	3	1.029	1.395	1.441	0.989903	0.929989	0.728337	10.06	9.34	0.25	91.1	85.5	123.4	8.46	9.31	1.73
1150699816	filament-like plant protein 4 [Asparagus officinalis]	14.062	5	3	8	3	1068	119.6	5.33	3.86	3	0.915	1.267	1.241	0.991268	0.949627	0.918093	6.14	14.35	1.62	91.3	93.2	115.6	21.43	19.53	31.59
1150712863	lon protease homolog, mitochondrial-like [Asparagus officinalis]	11.728	4	3	16	1	970	107.5	6.09	6.4	3	0.824	0.464	0.619	0.991268	0.962593		14.54	97.98	93.05	130.5	104.7	64.8	17.83	21.63	88.09
1150749960	LOW QUALITY PROTEIN: peptide methionine sulfoxide reductase-like [Asparagus officinalis]	15.008	11	3	27	3	209	23.3	7.43	49.15	3	1.023	0.634	0.642	0.991268	0.98003	0.607556	0.04	37.31	33.3	114.3	113.3	72.4	2.07	2.49	25.58
1150677179	uncharacterized protein LOC109850164 [Asparagus officinalis]	18.245	44	3	25	3	71	8.3	9.41	50.59	3	0.724	0.692	1.128	0.991268	0.98003	0.932464	10.87	10.14	29.48	122.4	83.5	94.1	8.39	8.05	27.86
1150748106	translin [Asparagus officinalis]	6.393	9	3	14	3	286	32.3	7.08	19.49	3	0.773	0.656	0.974	0.991268	0.98003	0.995088	14.08	1.94	1.76	119.6	92.5	88	9.33	3.8	10
1150676875	GBF-interacting protein 1-like [Asparagus officinalis]	14.606	5	3	19	3	901	96	6.54	32.21	3	0.747	0.339	0.323	0.991757	0.905257	0.0242167	9.71	33.88	26.15	153.5	114.7	31.8	29.66	11.15	48.41
1150734524	LIMR family protein Os06g0128200 [Asparagus officinalis]	20.478	4	3	28	2	510	56.4	8.78	34.74	3	0.882	1.633	1.859	0.991757	0.910432	0.357083	0.67	43.77	57.56	85.4	75	139.5	22	47.43	12
1150705265	LOW QUALITY PROTEIN: uncharacterized protein At5g49945-like [Asparagus officinalis]	14.6	12	3	13	3	478	53.6	6.27	23.01	3	0.636	0.348	0.669	0.991757	0.919199	0.859906	1.08	34.14	34.32	150.9	96.7	52.5	20.88	36.58	102.83
1150726652	transmembrane emp24 domain-containing protein p24delta9-like [Asparagus officinalis]	42.726	19	3	98	3	210	24	6.52	237.4	3	0.889	1.081	1.195	0.991757	0.950938	0.916613	2.4	14	16.68	100.5	90.9	108.6	4.34	14.64	25.02
1150685290	LOW QUALITY PROTEIN: probable protein phosphatase 2C 11 [Asparagus officinalis]	13.554	7	3	22	1	499	54.8	5.4	40.37	3	0.625	0.439	0.612	0.991757	0.962593	0.785905	52.45	38.14	65	160	86.9	53.1	34.99	13.41	49.05
1150725652	aspartic proteinase-like [Asparagus officinalis]	32.128	9	3	49	3	507	55.6	5.1	152.02	3	0.784	1.143	1.431	0.991757	0.96313	0.705147	2.35	43.07	41.07	102	81.4	116.6	25.62	25.85	8.25
1150680544	uncharacterized protein LOC109828907 [Asparagus officinalis]	12.119	6	3	3	3	590	64.8	7.55	4.63	3	0.653	0.502	0.939	0.991757	0.966091	0.98702	32.29	9.99	66.61	141.2	90.8	68.1	15.07	12.92	59.79
1150744786	carbonyl reductase [NADPH] 2 [Asparagus officinalis]	13.3	11	3	10	3	266	29.4	8.13	4.53	3	0.833	1.019	1.068	0.991757	0.974473	0.993437	5.68	19.65	0.93	110.4	92	97.6	9.78	0.92	28.03
1150734501	sucrose synthase 7-like isoform X1 [Asparagus officinalis]	8.985	4	3	6	2	855	97.5	8.29	3.72	3	0.819	0.867	0.704	0.991757	0.98003	0.916613	21.56	2.11	11.89	109.3	98.8	91.9	37.4	25.75	20.45
1150749205	succinate dehydrogenase subunit 6, mitochondrial [Asparagus officinalis]	40.294	34	3	57	3	149	16.8	8.7	193.9	3	0.746	0.953	0.942	0.991757	0.98003	0.974307	1.32	19.7	54.27	107.4	92.4	100.2	9.11	14.56	32.46
1150717664	serine/threonine-protein phosphatase 5 [Asparagus officinalis]	27.887	8	3	20	3	483	54.5	6.11	49.91	3	0.79	0.723	0.945	0.991757	0.985953	0.993775	0.69	4.69	14.17	120.1	95.3	84.6	2.21	14	5.44
1150686461	ribonuclease TUDOR 2-like [Asparagus officinalis]	18.206	6	3	22	3	999	109.6	6.79	29.83	3	0.661	0.668	0.976	0.991757	0.994357	0.995088	2.69	18.2	7.74	128.6	94.1	77.3	25.4	29.56	26.73
1150714566	putative 4-hydroxy-4-methyl-2-oxoglutarate aldolase 3 isoform X1 [Asparagus officinalis]	7.099	15	3	8	2	177	18.6	4.88	13.51	3	0.831	0.908	0.948	0.991915	0.98377	0.990161	19.6	8.44	10.04	125.3	86.6	88.1	20.94	24.36	20.36
1150713019	ATP-dependent Clp protease proteolytic subunit 5, chloroplastic [Asparagus officinalis]	14.676	15	3	25	3	293	31.6	7.53	59.32	3	0.8	0.686	0.857	0.993221	0.98003	0.918138	5.61	9.97	4.53	121	95.8	83.2	2.93	2.91	9.28
1150684691	LOW QUALITY PROTEIN: nuclear transport factor 2-like [Asparagus officinalis]	28.354	44	3	86	3	118	13.1	8.19	233.51	3	0.821	0.75	0.892	0.993253	0.982884	0.918093	15.81	19.99	19.87	119.5	101.1	79.5	9.36	8.64	26.4
1150746575	probable mediator of RNA polymerase II transcription subunit 36b [Asparagus officinalis]	13.582	30	3	17	1	139	15.5	8.78	31.2	3	0.644	0.17	0.355	0.993913	0.744953	0.223424	7.24	17.15	50.52	169.8	101.2	28.9	8.25	18.57	46.63
1150714410	60S ribosomal protein L36a [Asparagus officinalis]	30.179	28	3	64	3	105	12.1	10.24	170.81	3	0.764	0.609	0.739	0.993913	0.961944	0.617175	2.8	14.35	2.88	122.8	101.1	76.1	12.7	11.39	2.47
1150743637	dihydropyrimidine dehydrogenase (NADP(+)), chloroplastic [Asparagus officinalis]	15.29	12	3	10	3	368	40.1	5.63	11.01	3	0.713	0.481	0.663	0.993913	0.962593	0.786185	8.44	5.35	2.89	139	91.3	69.7	9.52	8.57	11.4
1150693150	proline--tRNA ligase [Asparagus officinalis]	17.692	12	3	50	3	338	36.3	8	94.97	3	0.962	1.143	1.141	0.993913	0.962593	0.957433	11.88	5.9	2.06	86.6	99.7	113.7	11.25	16.4	9.77
P13603	Alcohol dehydrogenase 1 OS=Trifolium repens OX=3899 GN=ADH1 PE=2 SV=1	32.456	8	3	136	1	380	41.1	6.52	353.79	3	0.661	0.987	1.213	0.993913	0.98003	0.932464	27.68	20.55	5.44	143.8	70.8	85.5	38.22	54.13	43.42
1150734060	4-hydroxy-3-methylbut-2-enyl diphosphate reductase, chloroplastic [Asparagus officinalis]	13.48	8	3	29	3	462	51.7	5.58	41.81	3	0.79	0.899	1.01	0.993913	0.98377	0.995088	16.71	28.22	14.91	122.8	92.8	84.3	26.96	10.85	31.61
1150737906	pentatricopeptide repeat-containing protein At1g26460, mitochondrial [Asparagus officinalis]	26.654	6	3	27	3	623	69.4	6.8	54.63	3	0.975	0.708	0.758	0.993913	0.983932	0.884087	8.6	24.12	6.61	118.6	103.5	77.9	9.36	10.31	31.1
1150745222	protein-L-isoaspartate O-methyltransferase-like [Asparagus officinalis]	15.164	17	3	22	2	284	30.4	6.86	51.71	3	0.63	0.759	1.494	0.993913	0.985953	0.836712	56.16	16.7	53.11	97.8	81.1	121.1	43.66	22.07	35.06
1150680863	uncharacterized protein LOC109829010 [Asparagus officinalis]	19.46	10	3	35	3	343	39.3	9.91	62.97	3	0.958	0.897	0.77	0.993913	0.985953	0.906263	11.96	12.45	25.17	110.2	111.8	77.9	18.34	25.5	21.63
1150687090	ATP-dependent (S)-NAD(P)H-hydrate dehydratase isoform X1 [Asparagus officinalis]	9.278	14	3	3	3	370	39.9	7.55	2.15	3	0.842	0.771	1.289	0.993913	0.987245	0.916613	8.24	54.34	8.94	115.2	90.2	94.6	9.67	13.94	38.46
1150669962	LOW QUALITY PROTEIN: mitochondrial import receptor subunit TOM40-1-like [Asparagus officinalis]	24.797	16	3	17	1	319	35.7	7.55	48.35	3	0.835	0.692	0.869	0.993913	0.999557	0.970452	35.5	9.27	16.92	117.2	101.6	81.1	6.56	19.53	14.47
1150748074	nuclear pore complex protein GP210 [Asparagus officinalis]	10.646	2	3	5	3	1904	207.7	5.92	8.6	3	0.799	0.23	0.287	0.994359	0.852465	0.0121093	2.06	38.08	40.71	150.3	113.2	36.5	6.5	7.29	85.28
1150699633	LOW QUALITY PROTEIN: ATPase family AAA domain-containing protein 3-like [Asparagus officinalis]	10.217	4	3	9	2	630	70.9	9.77	10.58	3	0.686	0.538	0.931	0.994359	0.98377	0.995088	5.56	13.4	7.13	128.8	90.4	80.7	14.82	22.75	10.01
1150727114	acyl carrier protein 1, chloroplastic-like [Asparagus officinalis]	26.144	16	3	57	3	135	14.2	4.94	189.1	3	0.852	0.926	1.188	0.994359	0.983932	0.916613	28.49	13.52	6.25	104.5	93.6	101.8	3.33	21.11	24.93
1150731857	epidermal growth factor receptor substrate 15-like [Asparagus officinalis]	17.391	4	3	9	3	1135	123.6	5.4	5.85	3	0.794	0.822	0.987	0.994359	0.988482	0.994489	16.07	9.56	6.96	114.7	91	94.3	11.04	40.75	56.65
1150718729	V-type proton ATPase subunit F [Asparagus officinalis]	19.325	27	3	20	3	128	14.3	6.57	25.41	3	0.941	0.899	0.97	0.994359	0.999001	0.995088	10.49	14.42	12.37	114.7	94.1	91.2	13.49	9.57	18.24
O65361	Delta-1-pyrroline-5-carboxylate synthase OS=Mesembryanthemum crystallinum OX=3544 GN=P5CS PE=2 SV=1	12.698	5	3	8	1	719	77.8	6.29	21.82	3	0.695	0.788	1.303	0.994359	0.999557	0.916613	16.51	7.81	11.84	117.5	89.9	92.6	10.26	15.16	25.46
1150735473	ethanolamine-phosphate cytidylyltransferase [Asparagus officinalis]	11.373	11	3	11	3	419	46.9	7.42	13.59	3	0.798	0.716	0.924	0.994359	0.999557	0.995088	4.42	9.05	4.9	121	96.5	82.6	3.18	7.5	7.12
1150674057	3-methyl-2-oxobutanoate hydroxymethyltransferase 1, mitochondrial-like [Asparagus officinalis]	11.356	10	3	18	3	326	34.5	8.46	18.76	3	0.764	0.61	0.798	0.995781	0.98377	0.916613	10.71	42.91	17.92	126.4	96.5	77	19.52	6.02	15.26
1150676897	N-carbamoylputrescine amidase [Asparagus officinalis]	18.295	18	3	9	3	299	33.3	6.19	21.92	3	0.777	0.548	1.099	0.996103	0.978293	0.984814	5.62	51.95	25.46	118.2	86.6	95.2	47.67	5.41	24.15
1150706869	vesicle transport v-SNARE 11-like isoform X1 [Asparagus officinalis]	29.995	18	3	14	3	225	25.4	9.23	38.5	3	0.721	0.441	0.612	0.996275	0.950938	0.741339	18.18	74.2	41.1	143.4	93.3	63.3	18.43	7.22	42.03
1150687395	serine/arginine-rich-splicing factor SR34-like isoform X1 [Asparagus officinalis]	17.934	21	3	18	1	291	32.6	10.81	34.35	3	0.647	0.496	0.849	0.996275	0.974473		49.16	14.46	125.88	132.6	106.4	61	15.5	76.33	32.77
1150670881	uncharacterized protein LOC109828170 [Asparagus officinalis]	8.674	26	3	4	3	284	29.9	9.17	6.1	3	0.722	0.876	1.322	0.996275	0.98377	0.916613	4.07	13.18	15.86	118.9	79.5	101.6	8.23	5.72	16.4
1150679487	40S ribosomal protein S24-1 [Asparagus officinalis]	45.086	32	3	52	2	138	15.6	10.73	163.95	3	0.826	0.492	0.655	0.996716	0.919199	0.366053	10.48	33.99	14.86	143.4	98.2	58.4	10.6	20.03	52.43
1150668547	alpha-1,4 glucan phosphorylase L isozyme, chloroplastic/amyloplastic isoform X1 [Asparagus officinalis]	8.077	3	3	9	3	971	109.8	6.34	14.11	3	0.701	1.229	1.226	0.996716	0.957023	0.944496	28.52	13.01	46.08	115.1	83.1	101.9	21.51	14.25	35.85
1150683710	2-alkenal reductase (NADP(+)-dependent)-like [Asparagus officinalis]	9.612	17	3	3	3	351	38.7	7.69	7.04	3	0.753	0.889	1.119	0.996716	0.975919	0.971938	23.17	59.55	8.22	111.1	89.3	99.6	50.37	21.6	0.57
1150735754	phosphatase IMPL1, chloroplastic [Asparagus officinalis]	24.307	17	3	13	3	354	38.6	6.73	42.9	3	0.865	0.957	1.057	0.996716	0.982884	0.990161	17.84	6.91	5.41	105.6	91.4	103	2.13	13.17	6.26
1150739764	tetratricopeptide repeat protein 1 isoform X2 [Asparagus officinalis]	11.532	17	3	6	3	227	25.5	5.06	2.1	3	0.763	0.868	1.223	0.996716	0.983932	0.932464	18.42	21.55	13.2	109.5	95.4	95.1	12.17	32.24	34.81
1150711528	uncharacterized protein LOC109841916 [Asparagus officinalis]	15.88	11	3	10	3	349	39	9.44	33	3	0.847	1	1.14	0.996716	0.983932	0.932464	5.17	12.99	26.21	104.2	91.5	104.3	8.47	5.85	36.94
1150710530	glutaredoxin-C8 isoform X1 [Asparagus officinalis]	23.168	26	3	28	3	136	14.8	5.57	56.33	3	0.873	0.795	0.91	0.996716	0.996344	0.951128	5.91	12.64	7.01	118.3	102.6	79.1	11.35	10.88	21.41
1150706093	uncharacterized protein LOC109839684 [Asparagus officinalis]	30.113	42	3	9	3	85	9.5	10.59	13.63	3	0.786	0.415	0.528	0.997415	0.934163	0.45394	10.93	19.37	43.03	136.3	107.2	56.6	12	24.46	10.23
1150709237	LOW QUALITY PROTEIN: TBCC domain-containing protein 1-like [Asparagus officinalis]	14.618	8	3	6	3	555	61.1	5.58	7.79	3	0.759	0.741	0.977	0.997415	0.999557	0.995088	30.34	27.57	3.47	129.1	86.5	84.5	9.7	34.44	27.93
1150747508	protein EARLY-RESPONSIVE TO DEHYDRATION 7, chloroplastic-like [Asparagus officinalis]	25.189	20	3	13	3	271	29	10.27	35.16	3	0.838	0.96	1.228	0.997763	0.98003	0.916613	21.04	29.58	15.45	105.1	88.1	106.7	5.3	10.76	30.51
1150733812	synaptotagmin-5-like [Asparagus officinalis]	7.979	6	3	6	2	565	63.4	5.57	3.82	3	0.74	0.767	1.036	0.997789	0.985953	0.990161	11.31	26.41	12.82	119.7	88.6	91.8	7.92	14.59	36.84
1150728821	uncharacterized protein LOC109849748 [Asparagus officinalis]	9.574	10	3	11	3	221	24.4	9.83	17.5	3	0.89	0.559	0.588	0.998788	0.965327	0.519773	1.26	25.22	12.63	119.8	106.7	73.5	20.18	17.02	17.54
1150710361	probable GDP-L-fucose synthase 1 [Asparagus officinalis]	6.98	16	3	3	3	317	34.9	6.46	0	3	0.849	1.045	1.546	0.998788	0.967513	0.671457	0.7	56.77	15.93	105.4	84.5	110.1	16.26	23.96	53.73
1150713466	LOW QUALITY PROTEIN: ATP-dependent zinc metalloprotease FTSH 8, mitochondrial-like [Asparagus officinalis]	11.778	4	3	19	3	790	87.4	8.19	33.75	3	0.727	0.618	0.885	0.999387	0.98377	0.967567	8.29	1.88	6.34	127.2	92.5	80.4	6.3	7.82	15.27
1150738930	uncharacterized protein LOC109821833 [Asparagus officinalis]	39.339	37	3	60	3	129	14.1	7.84	195.96	3	0.883	0.847	0.949	0.999387	0.999557	0.965995	15.26	13.81	1.61	109.6	97.2	93.2	1.27	16.97	22.63
1150739576	annexin D5 [Asparagus officinalis]	17.427	13	3	13	3	315	35.1	9.04	25.84	3	0.891	0.924	0.811	0.999709	0.98377	0.916613	5.26	25.21	15.78	110.2	104.1	85.7	11.73	5.76	33.03
Q8L940	Pyridoxal 5'-phosphate synthase subunit PDX1.3 OS=Arabidopsis thaliana OX=3702 GN=PDX13 PE=1 SV=2	11.21	10	3	9	1	309	33.2	6.11	18.49	3	0.745	0.652	0.834	0.999709	0.999557	0.957608	20.55	14.19	59.54	120.8	104.4	74.9	19.19	37.46	72.8
1150729771	uncharacterized protein LOC109850149 [Asparagus officinalis]	14.376	23	3	3	3	169	19.2	6.1	4.11	3	0.757	3.093	3.418		0.704635	0.0366568	1.06	24.15	49.49	60	54.4	185.6	14.63	34.62	40.94
1150674524	zingipain-2-like [Asparagus officinalis]	40.477	21	4	50	4	333	37.2	7.02	129.53	4	18.496	40.814	2.207	1.05936e-05	2.0432e-08	0.017916	14.01	32.75	17.12	4.6	86.9	208.5	8.9	22.04	37.55
Q9SIF2	Heat shock protein 90-5, chloroplastic OS=Arabidopsis thaliana OX=3702 GN=HSP90-5 PE=1 SV=1	17.177	6	4	11	1	780	88.6	5.01	16.58	4	26.861	24.954	0.707	5.25333e-05	0.00245229	0.664845	136.35	119.37	1.79	4.2	174.1	121.6	150.89	30.07	18.21
1150695589	60S acidic ribosomal protein P0-3-like [Asparagus officinalis]	34.759	8	4	80	1	290	32.5	5.88	269.43	4	25.591	100	3.582	0.00037076	2.75958e-15	5.15707e-07	58.4	0	83.34	1.6	65.1	233.3	63.31	70.95	3.48
1150681916	ervatamin-B-like [Asparagus officinalis]	13.116	10	4	42	4	338	37.8	7.59	80.18	4	10.282	16.593	1.614	0.000491779	3.79723e-05	0.337067	34.34	79.74	57.32	6.9	112.1	180.9	37.21	36.05	62.87
1150731920	acetyl-coenzyme A carboxylase carboxyl transferase subunit alpha, chloroplastic [Asparagus officinalis]	17.061	9	4	13	4	769	85.2	6.98	22.76	4	6.611	8.541	1.421	0.00415946	0.00376916	0.61751	22.34	7.92	2	19.9	115.7	164.4	39	7.94	1.88
1150690071	YTH domain-containing family protein 2-like [Asparagus officinalis]	25.749	10	4	15	2	681	74.3	8.34	16.83	4	6.9	6.883	0.998	0.0119951	0.0444322	0.995088	32.93	37.18	3.4	20.3	140	139.7	16.19	38.76	45.65
1150739025	caffeic acid 3-O-methyltransferase-like [Asparagus officinalis]	30.555	13	4	58	2	363	40	5.44	173.52	4	9.83	25.208	2.445	0.0164235	1.01923e-05	0.00252228	9.57	16	7.2	9.2	84.4	206.4	75.47	25.06	30.27
1150741252	LOW QUALITY PROTEIN: callose synthase 10-like [Asparagus officinalis]	11.553	2	4	31	3	1885	216.5	8.78	49.68	4	0.158	0.039	0.411	0.036871	1.61765e-05	0.00157041	11.57	56.54	38.4	250.7	39.7	9.7	4.08	45.23	69.65
Q9SIV2	26S proteasome non-ATPase regulatory subunit 2 homolog A OS=Arabidopsis thaliana OX=3702 GN=RPN1A PE=1 SV=2	39.425	7	4	38	2	891	98.1	5.1	135.93	4	0.135	0.199	0.814	0.0430477	0.28098	0.918093	33.61	25.87	22.53	221.2	29.8	49	8.09	61.32	46.65
1150684380	ervatamin-B-like [Asparagus officinalis]	16.178	14	4	19	4	340	37.8	5.55	45.17	4	7.768	13.253	1.706	0.0472286	0.0195304	0.154543	73.29	83.49	4.73	16.3	104.8	178.9	21.73	68.61	79.55
1150670704	probable carboxylesterase 3 [Asparagus officinalis]	32.521	27	4	81	4	124	13.7	6.04	163.55	4	4.312	7.031	1.399	0.0709061	0.0124675	0.664685	3.05	0.67	8.4	23.7	118.5	157.7	10.72	12.7	3.77
1150749358	dnaJ homolog subfamily C GRV2 isoform X1 [Asparagus officinalis]	14.374	2	4	11	4	2415	263.1	6.01	12.03	4	4.138	3.026	0.632	0.0860068	0.332368	0.276704	24.41	0.91	20.18	41.4	167.8	90.8	35.19	11.2	20.59
1150747350	NADH dehydrogenase [ubiquinone] 1 beta subcomplex subunit 10-B-like [Asparagus officinalis]	36.319	58	4	42	4	102	12.2	7.11	100.34	4	0.143	0.662	5.439	0.0950294	0.974473	7.67937e-07	34.85	22.05	7.62	167.1	22.4	110.5	9	87.32	50.33
1150732876	histone H2AX [Asparagus officinalis]	17.976	32	4	58	1	139	14.6	10.36	103.61	4	0.095	0.102	0.582	0.140314	0.526425		70.06	46.74	4.28	251.8	26	22.2	11.38	62.36	45.55
1150748399	subtilisin-like protease SBT1.5 [Asparagus officinalis]	21.628	22	4	50	1	223	24	5.39	125.49	4	7.863	16.864	2.084	0.158613	0.103277	0.192873	29.45	32.65	4.3	12.9	93.1	194	19.99	15.82	31.62
1150739202	protein DMR6-LIKE OXYGENASE 2-like [Asparagus officinalis]	34.979	23	4	21	4	351	38.9	5.58	61.82	4	0.161	0.251	1.555	0.188494	0.776847	0.808935	11.48	50.92	1.27	208.3	39.5	52.2	15.91	18.13	37.54
1150706509	LOW QUALITY PROTEIN: eukaryotic translation initiation factor 2 subunit alpha homolog [Asparagus officinalis]	34.152	10	4	89	3	321	36.2	5.15	205.76	4	4.702	5.637	1.27	0.21221	0.233534	0.810777	21.14	8.75	34.31	27.4	128.7	144	17.83	35.71	15.1
P81406	NADP-dependent glyceraldehyde-3-phosphate dehydrogenase OS=Pisum sativum OX=3888 GN=GAPN PE=1 SV=1	31.714	11	4	36	1	496	53	7.15	93.28	4	0.113	0.151	1.111	0.222311	0.744953	0.972144	91.23	41.48	31.14	243.3	24.2	32.5	10.91	91.3	61.65
1150684730	HVA22-like protein e [Asparagus officinalis]	45.06	22	4	44	4	144	16.8	8.76	122.82	4	0.191	0.106	0.535	0.227671	0.137318	0.55412	5.25	21.58	87.54	230.1	45.6	24.4	7.06	39.38	50.22
1150748444	peptidyl-prolyl cis-trans isomerase FKBP15-1-like [Asparagus officinalis]	24.897	24	4	16	4	158	16.8	5.21	27.43	4	0.193	0.112	0.868	0.23858	0.162459	0.949645	51.18	52.1	19.04	230	44.3	25.7	6.2	56.58	76.01
1150748541	HMG1/2-like protein [Asparagus officinalis]	19.011	30	4	23	4	161	18	7.24	59.86	4	3.511	0.845	0.332	0.256718	0.990002	2.40424e-05	16.4	36.85	78.93	54.8	186.3	58.9	19.52	4.03	65.51
1150748158	cytochrome P450-like [Asparagus officinalis]	28.461	24	4	68	4	219	25.3	8.48	162.46	4	2.74	2.963	1.081	0.397321	0.490276	0.986947	21.45	49.11	24.17	46.9	121.6	131.5	8.62	22.33	51.07
Q75W16	Phospho-2-dehydro-3-deoxyheptonate aldolase 2, chloroplastic OS=Oryza sativa subsp. japonica OX=39947 GN=DAHPS2 PE=2 SV=1	12.605	8	4	25	1	539	59.3	8.41	31.51	4	0.145	1.387	10.506	0.399286	0.9315	7.76524e-08	27.95	11.05	11.74	120	17.4	162.5	15.77	120.48	17.35
1150721564	carbamoyl-phosphate synthase small chain, chloroplastic [Asparagus officinalis]	28.031	16	4	27	4	324	35.4	7.14	59.96	4	0.244	0.194	0.812	0.418033	0.483205	0.919297	3.4	14.92	27.51	205.4	49	45.5	14.66	18.53	13.95
1150714767	universal stress protein PHOS34-like [Asparagus officinalis]	39.671	31	4	15	4	191	20.1	6.84	45.09	4	0.242	0.062	0.325	0.450683	0.0283124	0.0797482	18.53	49.54	43.54	219.5	60.8	19.8	35.82	21.28	35.65
1150736573	peroxidase P7-like [Asparagus officinalis]	23.069	19	4	17	4	342	36.9	8.73	29.35	4	0.278	0.15	0.539	0.4801	0.23658	0.395955	17.75	23.1	4.77	214.2	53.2	32.7	22.07	7.8	13.92
1150736625	60S ribosomal protein L37a [Asparagus officinalis]	28.723	45	4	45	2	92	10.2	10.23	93.65	4	0.274	0.144	0.492	0.482317	0.196914	0.256463	32.92	11.92	9.6	211.6	58	30.5	2.76	29.9	25.6
1150690202	probable ribose-5-phosphate isomerase 3, chloroplastic [Asparagus officinalis]	26.453	32	4	31	4	213	22.4	4.79	32.01	4	3.214	6.441	2.27	0.485582	0.307352	0.123657	17.37	43.81	3.52	27.6	94.4	178	7.89	12.73	27.92
1150702449	squamous cell carcinoma antigen recognized by T-cells 3 isoform X1 [Asparagus officinalis]	22.082	8	4	13	4	848	96.4	6.71	23.91	4	3.174	3.679	1.299	0.489017	0.510299	0.802616	15.97	81.77	94.21	36.5	139.4	124.1	13.85	22.32	76.19
1150716076	uncharacterized protein At4g28440-like [Asparagus officinalis]	37.476	37	4	29	4	137	15.1	8.68	70.09	4	0.249	0.134	0.538	0.489088	0.354173	0.56888	13.14	7.8	22.97	212.3	57.1	30.7	5.19	31.96	12.57
1150686616	LOW QUALITY PROTEIN: protein SAD1/UNC-84 domain protein 2-like [Asparagus officinalis]	18.561	14	4	37	4	441	48.9	6.62	72.63	4	0.286	0.313	1.098	0.510802	0.763291	0.972144	20.38	17.73	16.56	189.5	51.3	59.2	6.17	28.06	19.67
1150721607	oxysterol-binding protein-related protein 3C-like [Asparagus officinalis]	18.659	10	4	37	2	456	52.3	5.29	74.95	4	3.115	2.669	0.907	0.512769	0.742879	0.948133	15.15	7.31	8.73	43.7	138	118.2	8.32	13.6	48.68
1150694102	glycine-rich RNA-binding protein 2, mitochondrial-like [Asparagus officinalis]	29.212	22	4	24	4	238	23.5	4.94	76.51	4	0.288	0.181	0.616	0.513852	0.367669	0.61166	3.04	12.23	45.62	204.7	54.9	40.4	12.14	22.42	35.24
1150727003	chorismate mutase 1, chloroplastic-like [Asparagus officinalis]	31.523	14	4	31	4	314	35.2	8.35	53.74	4	2.352	1.794	0.748	0.529607	0.794318	0.66302	2.86	57.06	35.68	54	127	119	53.83	29.08	20.09
Q9FLP6	Small ubiquitin-related modifier 2 OS=Arabidopsis thaliana OX=3702 GN=SUMO2 PE=1 SV=1	28.393	27	4	62	4	103	11.6	5.55	162.49	4	2.104	2.497	1.305	0.542153	0.483653	0.81111	12.39	17.46	20.05	54.4	109.6	135.9	8.44	6.98	13.65
1150716900	LOW QUALITY PROTEIN: RGG repeats nuclear RNA binding protein A-like [Asparagus officinalis]	38.349	18	4	46	3	383	40.9	7.97	105.25	4	2.955	3.398	1.254	0.545415	0.596537	0.859906	31.14	10.08	12.17	41.9	115.6	142.5	30.33	7.47	8.08
1150677938	putative 4-hydroxy-4-methyl-2-oxoglutarate aldolase 2 [Asparagus officinalis]	10.647	20	4	25	1	168	18.1	6.18	22.9	4	0.257	0.297	0.997	0.550473	0.856511	0.99536	34.06	14.25	30.63	194.5	47.8	57.7	4.41	27.12	18.55
1150702681	tubulin-folding cofactor B [Asparagus officinalis]	13.924	21	4	23	4	242	27.4	5.27	35.07	4	2.811	1.721	0.729	0.631101	0.893591	0.765082	13.38	1.04	29.45	55	149.1	95.8	7.31	23.51	8.01
1150739820	uncharacterized protein LOC109822277 [Asparagus officinalis]	23.408	76	4	29	4	55	6.6	10.24	65.05	4	0.313	0.216	0.714	0.633284	0.436968	0.801183	24.58	24.53	5.32	192.9	63.4	43.7	8.12	23.4	72.11
1150709007	3-hydroxyisobutyryl-CoA hydrolase-like protein 5 [Asparagus officinalis]	17.845	14	4	16	4	387	43.2	6.18	35.63	4	0.305	0.63	1.852	0.645419	0.962593	0.348549	4.02	27.44	14.61	160.6	48.9	90.5	19.64	40.33	39.18
P43395	ATP synthase subunit beta, mitochondrial (Fragment) OS=Actinidia deliciosa OX=3627 GN=ATPB PE=2 SV=1	31.189	35	4	87	1	173	19	4.92	224.41	4	0.173	0.157	0.905	0.655235	0.784855		72.81	112.33	32.7	231.6	31.7	36.8	61.21	29.9	38.83
P25819	Catalase-2 OS=Arabidopsis thaliana OX=3702 GN=CAT2 PE=1 SV=3	17.047	7	4	50	1	492	56.9	7.12	104.68	4	2.625	3.79	1.412	0.655998	0.462083	0.568501	10.93	11.17	3.3	39.4	108	152.6	22.87	15.13	6.37
P12886	Alcohol dehydrogenase 1 OS=Pisum sativum OX=3888 PE=1 SV=1	26.261	11	4	155	1	380	41.1	6.52	407.82	4	2.889	0.971	0.833	0.655998	0.962593	0.922029	88.45	103.84	83.1	49.3	202.8	47.9	40.2	59.71	133.35
1150742406	LOW QUALITY PROTEIN: uncharacterized oxidoreductase At4g09670-like [Asparagus officinalis]	24.184	14	4	32	4	359	40	8.18	75.81	4	2.094	2.416	1.209	0.659346	0.596537	0.916613	11.74	15.96	21.98	54.6	114.3	131.2	1.06	16.59	12.7
1150702568	ras-related protein RABD1 [Asparagus officinalis]	16.998	22	4	21	2	202	22.7	5.48	44.64	4	0.179	0.202	1.461	0.670431	0.831895		21.48	12.43	38.33	211.4	38.7	49.8	18.93	33.92	13.91
1150714014	LOW QUALITY PROTEIN: sugar transporter ERD6-like 6 [Asparagus officinalis]	25.303	10	4	17	4	461	49.5	8.66	41.58	4	0.318	0.498	0.758	0.674071	0.92384	0.916613	30.44	0.47	8.33	170.3	44.9	84.8	12.93	59.31	46.81
1150724703	anthranilate synthase beta subunit 1, chloroplastic-like [Asparagus officinalis]	10.295	21	4	20	4	271	29.5	7.81	46.76	4	1.867	1.364	0.731	0.679166	0.901572	0.594125	5.27	93.46	54.09	65.3	111	123.8	27.56	28.84	56.56
1150726941	NAP1-related protein 2-like isoform X1 [Asparagus officinalis]	35.028	29	4	25	3	256	29.6	4.35	58.84	4	0.257	0.206	0.546	0.703939	0.794318	0.589201	14.95	1.47	21.46	203	58.9	38.1	16.36	32.5	13.43
Q9C9C4	Enolase 1, chloroplastic OS=Arabidopsis thaliana OX=3702 GN=ENO1 PE=1 SV=1	21.183	9	4	92	2	477	51.4	6.13	171.96	4	0.277	0.447	1.703	0.708865	0.92641	0.670268	15.54	22.34	1.04	193	40.9	66.1	16.49	42.99	43.86
1150728518	hsp70 nucleotide exchange factor fes1-like [Asparagus officinalis]	22.025	13	4	14	4	367	39.9	5.17	30.94	4	0.287	0.266	0.926	0.731647	0.798727	0.990161	18	9.63	9.52	201.7	51	47.3	8.34	31.74	23.26
1150711534	aminoacylase-1 [Asparagus officinalis]	13.892	19	4	10	4	365	40	5.77	10.51	4	0.291	0.506	1.772	0.744013	0.954542	0.664845	63.91	2.76	31.2	167.3	48	84.7	15.99	48.98	10.41
1150746852	LOW QUALITY PROTEIN: uridine kinase-like protein 1, chloroplastic [Asparagus officinalis]	24.948	12	4	25	1	477	53.2	6.67	51.38	4	0.219	0.444	2.025	0.748792	0.957023		109.76	15.11	58.42	180.4	39.5	80.1	31.03	64.48	17.66
1150703248	uncharacterized protein LOC109838270 [Asparagus officinalis]	19.897	19	4	54	4	275	30.5	7.53	102.67	4	1.89	2.415	1.279	0.749753	0.668649	0.84721	0.14	2.13	2.27	56.5	106.7	136.8	18.65	9.54	3.45
1150684051	LOW QUALITY PROTEIN: peroxidase 12-like [Asparagus officinalis]	18.406	12	4	23	4	351	38.3	8.63	58.88	4	0.349	1.214	3.384	0.753781	0.961292	0.000960984	34.37	79.1	39.15	116.7	40.8	142.6	10.81	23.48	75.93
1150743076	long chain acyl-CoA synthetase 9, chloroplastic [Asparagus officinalis]	12.828	6	4	9	4	697	76.5	8.03	15.8	4	1.997	2.223	1.113	0.760665	0.80828	0.957433	35.33	2.15	30.27	56.1	112.2	131.7	5.03	28.79	3.28
P24525	Peptidyl-prolyl cis-trans isomerase OS=Brassica napus OX=3708 GN=CYP PE=2 SV=2	10.78	16	4	66	2	171	18.5	8.32	108.91	4	1.807	1.213	0.762	0.763318	0.92384	0.696826	17.55	2.72	4.98	78.8	125.6	95.6	39.32	30.6	23.91
1150680139	uncharacterized protein At2g34160-like [Asparagus officinalis]	17.513	28	4	15	1	129	14.4	5.59	30.96	4	0.213	0.161	0.894	0.780103	0.7976		14.83	29.17	38.99	221.3	47.1	31.6	12.51	38.37	34.36
1150668907	probable aquaporin PIP1-2 [Asparagus officinalis]	38.857	16	4	72	2	286	30.5	8.62	173.73	4	0.432	0.273	0.668	0.780804	0.462083	0.402035	8.45	4.3	13	178.3	72.9	48.8	16.38	29.97	54.16
1150709049	LOW QUALITY PROTEIN: DEAD-box ATP-dependent RNA helicase 56-like [Asparagus officinalis]	40.57	18	4	24	3	425	47.8	5.9	75.14	4	0.328	0.234	0.736	0.780804	0.758164	0.916613	4.77	49.2	46.01	184.7	66.4	48.9	15.73	6.23	44.25
1150705641	bifunctional aspartate aminotransferase and glutamate/aspartate-prephenate aminotransferase isoform X1 [Asparagus officinalis]	20.872	13	4	46	4	461	49.8	8.57	93.18	4	0.37	0.465	1.28	0.784387	0.905257	0.916613	5.6	2.78	24.56	166	62.2	71.8	4.56	35.5	7.99
1150684671	putative bifunctional dihydrofolate reductase-thymidylate synthase [Asparagus officinalis]	17.101	9	4	15	4	585	65.9	7.78	13.84	4	0.266	0.262	0.963	0.793378	0.88599	0.999335	2.89	27.47	29.82	195.3	52	52.7	6.62	13.98	30.74
1150714856	thioredoxin-like protein Clot [Asparagus officinalis]	28.843	29	4	51	4	132	14.8	5.58	105.39	4	1.676	1.712	1.065	0.813438	0.807193	0.990161	10.29	12.49	13.5	63.8	114.4	121.8	18.82	23.15	12.75
1150724324	probable nucleolar protein 5-2 [Asparagus officinalis]	21.03	9	4	19	4	595	66.1	8.76	32.1	4	0.35	0.317	0.923	0.82189	0.875739	0.984814	2.74	11.93	14.89	174.6	68.2	57.2	9.49	23.93	40.28
1150748084	DNA repair RAD52-like protein 1, mitochondrial [Asparagus officinalis]	13.254	22	4	15	4	192	21.4	8.59	30.06	4	0.348	0.149	0.461	0.825417	0.430421	0.352294	8.41	20.85	11.43	200.4	69.7	29.8	0.03	13.42	34.19
1150725253	LOW QUALITY PROTEIN: probable flavin-containing monooxygenase 1 [Asparagus officinalis]	17.436	8	4	25	4	496	56.6	7.34	53.99	4	2.102	1.828	0.87	0.825417	0.887807	0.922029	5.08	18.09	26.39	67.3	124.4	108.2	11.33	10.81	26.06
1150676294	28 kDa heat- and acid-stable phosphoprotein [Asparagus officinalis]	36.391	24	4	57	4	160	18.7	8.24	109.97	4	1.931	1.352	0.7	0.825417	0.934163	0.494379	4.03	11.15	7.7	67.9	127.6	104.5	24.98	15.78	13.88
1150712280	LOW QUALITY PROTEIN: UBP1-associated protein 2A-like [Asparagus officinalis]	25.888	10	4	25	4	436	46.5	5.06	55.86	4	0.401	0.389	0.919	0.84894	0.881076	0.985688	14.72	23.03	7.82	164.7	71.3	64	6.28	16.1	24.77
1150672523	putrescine hydroxycinnamoyltransferase 1-like [Asparagus officinalis]	35.609	40	4	52	4	156	17.2	4.77	113.87	4	1.999	2.868	1.417	0.850753	0.706926	0.541439	1.92	3.08	5.04	52.7	103.5	143.8	9.67	1.8	15.41
1150692486	alpha,alpha-trehalose-phosphate synthase [UDP-forming] 6-like [Asparagus officinalis]	18.632	7	4	19	3	847	95.8	6.21	38.89	4	0.28	0.282	1.005	0.852226	0.901273	0.995088	4.94	33.35	23.19	184.8	56	59.1	14.03	8.07	30.9
1150714686	WEB family protein At5g55860 [Asparagus officinalis]	23.453	7	4	26	4	666	72.7	5.41	78.8	4	0.324	0.212	0.656	0.859117	0.711948	0.772475	3.42	59.4	56.71	199.4	63.1	37.5	28.82	31.32	75.33
1150737734	uncharacterized protein LOC109821105 [Asparagus officinalis]	26.841	32	4	43	4	241	25.6	5.39	126.84	4	1.982	1.729	0.873	0.859117	0.901273	0.916613	4.6	3.97	8.8	61.4	121.7	116.9	14.15	17.5	8.13
1150694227	valine--tRNA ligase, mitochondrial 1-like [Asparagus officinalis]	16.596	8	4	20	4	611	70	5.57	42.08	4	1.644	1.917	1.166	0.859152	0.794318	0.91899	8.59	11.47	3.06	63.2	109.3	127.5	9.93	6.78	10.83
1150723630	delta-1-pyrroline-5-carboxylate synthase-like isoform X1 [Asparagus officinalis]	18.525	7	4	32	1	729	79.1	7.36	49.06	4	1.768	1.142	0.861	0.876223	0.934163	0.984408	48.43	3.01	15.23	89.2	111	99.8	20.98	42.08	6.2
1150682824	LOW QUALITY PROTEIN: histone H2A-like [Asparagus officinalis]	93.286	25	4	62	2	150	15.3	10.43	270.12	4	0.407	0.551	1.042	0.880319	0.954542	0.992425	15.17	49.31	7.45	152	61.8	86.2	23.46	38.24	54.14
1150719284	probable cellulose synthase A catalytic subunit 1 [UDP-forming] [Asparagus officinalis]	21.262	6	4	23	1	899	101.6	7.05	22.34	4	0.263	0.285	1.129	0.880738	0.913884	0.959629	91.47	20.74	23.26	188.6	49.6	61.8	45.06	36.79	15.1
Q9SVM4	Serine hydroxymethyltransferase 5 OS=Arabidopsis thaliana OX=3702 GN=SHM5 PE=3 SV=1	12.765	7	4	78	1	470	52.2	5.97	113.79	4	0.489	0.778	1.26	0.880738	0.985953	0.882348	0.92	3.53	17.65	131.6	70.1	98.3	7.51	9.9	14.22
1150713127	uncharacterized protein OsI_027940-like [Asparagus officinalis]	29.852	17	4	24	3	203	22	4.54	73.77	4	0.398	0.276	0.832	0.892541	0.818237	0.946676	19.58	5.27	55.9	179.8	70.7	49.6	11.21	12.6	51.7
1150670330	ras-related protein Rab7-like [Asparagus officinalis]	18.303	27	4	24	1	207	23.2	5.5	53.23	4	1.981	2.387	0.766	0.894473	0.799123	0.937856	60.16	123.61	54.09	71.8	134.6	93.6	81.7	7.54	61.43
1150742545	nascent polypeptide-associated complex subunit beta-like [Asparagus officinalis]	34.073	34	4	26	4	204	22.9	9.29	86.25	4	0.438	0.253	0.785	0.895003	0.682181	0.916613	27.16	19.56	28.3	188.8	67.1	44.1	12.93	31.46	54.52
1150685100	uncharacterized protein LOC109830729 isoform X1 [Asparagus officinalis]	20.807	17	4	18	4	390	43.6	6.39	30.8	4	1.741	2.553	1.532	0.895003	0.706032	0.39609	1.45	7.48	10.62	55.4	96.4	148.3	4.8	2.32	6.56
1150706070	probable serine protease EDA2 isoform X1 [Asparagus officinalis]	33.643	11	4	28	4	501	56.2	5.55	66.12	4	0.377	0.208	1.238	0.895412	0.794318	0.932464	9.14	13.6	69.63	191.7	64.9	43.5	17.26	44.41	65.68
Q2R480	6-phosphogluconate dehydrogenase, decarboxylating 2, chloroplastic OS=Oryza sativa subsp. japonica OX=39947 GN=G6PGH2 PE=2 SV=1	22.406	10	4	36	1	508	54.3	6.47	48.68	4	1.533	2.651	1.73	0.898021	0.734853	0.664685	6.35	32.15	36.92	66.3	86.8	146.9	10.97	12.61	47.32
1150671988	stem-specific protein TSJT1-like [Asparagus officinalis]	61.829	28	4	58	4	236	25.6	7.11	198.08	4	0.504	0.3	0.742	0.901712	0.608793	0.639978	33.69	11.99	33.49	169.6	79.5	50.9	13.15	45.62	45.95
1150671163	phosphoribosylformylglycinamidine cyclo-ligase, chloroplastic/mitochondrial [Asparagus officinalis]	26.248	26	4	17	4	310	32.6	6.68	43.35	4	0.463	0.379	0.828	0.904355	0.875739	0.924379	1.64	10.68	9.16	159.3	77	63.8	4.95	15.74	11.32
1150699785	probable aquaporin PIP2-8 isoform X1 [Asparagus officinalis]	47.219	22	4	37	3	278	30	8.31	87.79	4	0.476	0.315	0.587	0.916553	0.695828	0.154543	19.84	1.53	4.48	161.7	87.4	50.9	26.76	34.51	37.53
1150733136	translationally-controlled tumor protein homolog [Asparagus officinalis]	30.413	40	4	38	2	168	19	4.68	86.45	4	0.432	0.366	0.846	0.921519	0.901572	0.942412	11.01	37.97	29.13	175.3	70	54.7	16.17	22.16	56.62
1150728562	vacuolar protein sorting-associated protein 26B-like [Asparagus officinalis]	16.11	16	4	12	1	300	35.3	7.93	12.82	4	0.312	0.251	0.775	0.924734	0.886176	0.916613	3.99	5.37	13.86	193	60.3	46.7	23.77	16.79	94.11
1150678717	ER membrane protein complex subunit 2-A-like [Asparagus officinalis]	15.712	19	4	15	4	301	33.8	8.07	33.85	4	0.378	0.336	0.828	0.925948	0.910432	0.953735	29.37	38.84	23.71	174.7	73.1	52.2	12.77	18.18	40.31
1150675020	leucine aminopeptidase 2, chloroplastic-like [Asparagus officinalis]	26.076	34	4	78	4	140	14.9	5.21	220.63	4	1.486	1.723	1.159	0.927557	0.815527	0.927163	3.01	5.84	24.49	71.3	105.9	122.8	14.64	7.01	24.18
1150728970	developmentally-regulated G-protein 3 [Asparagus officinalis]	11.34	13	4	11	4	369	41.2	8.54	18.97	4	1.671	2.466	1.359	0.931663	0.759053	0.803025	14.09	1.2	12.78	58.5	97.7	143.8	3.16	18.4	38.24
1150690346	reticulon-like protein B8 [Asparagus officinalis]	24.82	17	4	31	4	246	27.5	8.27	76.53	4	1.557	1.757	1.129	0.931663	0.892683	0.944447	6.5	37.19	29.4	69.6	108.3	122.2	9.61	1.53	19.79
1150679715	syntaxin-71-like [Asparagus officinalis]	15.729	18	4	43	3	267	30.2	5.31	61.24	4	1.653	1.065	0.79	0.931663	0.966238	0.916613	9.59	11.29	36.03	80.1	134.6	85.3	5.49	27.3	20.55
1150676221	proton pump-interactor 1 [Asparagus officinalis]	25.652	10	4	32	4	605	68.9	8.95	51.69	4	1.556	0.935	1.334	0.931663	0.985953	0.746361	0.47	4.17	7.82	96.8	115.2	88	16.88	41.84	67.25
1150680751	iron-sulfur cluster assembly protein 1-like [Asparagus officinalis]	27.401	27	4	64	4	171	18.1	8.84	135.44	4	1.433	1.164	0.857	0.937836	0.957189	0.916613	24.17	5.01	13.53	85.6	118	96.3	26.27	8.8	13.37
1150698335	serine/threonine-protein kinase SAPK7 [Asparagus officinalis]	27.632	10	4	58	2	364	42.1	5.49	153.92	4	1.586	1.884	1.076	0.940913	0.887807	0.985688	8.85	12.43	15.36	65.2	123.8	111	18.43	15.56	22.72
A4QJI4	ATP synthase subunit alpha, chloroplastic OS=Aethionema grandiflorum OX=72657 GN=atpA PE=3 SV=1	11.646	7	4	30	2	507	55.3	5.26	61.3	4	1.599	1.546	0.967	0.940913	0.905257	0.995088	28.03	3.06	30.46	71.7	116	112.2	9.76	14.73	38.1
1150731287	mannose-specific lectin-like [Asparagus officinalis]	63.125	31	4	62	4	172	19.4	8.81	190.29	4	1.397	1.199	1.22	0.940913	0.934163	0.916613	21.76	18.34	45.5	72.8	96.8	130.4	39.37	46.55	27.37
1150735562	1,2-dihydroxy-3-keto-5-methylthiopentene dioxygenase 2-like [Asparagus officinalis]	23.368	26	4	35	2	200	23.4	5.39	58.03	4	1.423	1.137	0.799	0.940913	0.964592	0.916613	7.65	9.04	1.48	85.4	119.5	95.1	26.82	19.71	1.4
Q39258	V-type proton ATPase subunit E1 OS=Arabidopsis thaliana OX=3702 GN=VHA-E1 PE=1 SV=2	23.119	21	4	23	1	230	26	6.4	69.55	4	1.509	2.184	0.956	0.947558	0.751955	0.995088	117.27	14.14	58.86	84.9	128.2	86.9	81.8	78.83	61.99
1150710357	ubiquitin receptor RAD23b [Asparagus officinalis]	11.446	8	4	13	3	366	39.4	4.65	16.77	4	1.403	1.509	1.1	0.947558	0.919199	0.955876	13.63	10.51	22.27	76.8	107.3	115.9	18.75	20.83	3.76
1150716765	LOW QUALITY PROTEIN: protein ECERIFERUM 26-like [Asparagus officinalis]	22.524	13	4	14	4	399	44	6.21	27.96	4	1.502	14.006	9.431	0.948496	0.0183104	2.75261e-15	1.7	25.64	27.05	19.9	30.6	249.6	7.28	8.4	23.68
1150718133	uncharacterized protein LOC109844889 [Asparagus officinalis]	15.015	4	4	20	2	1129	123.4	5.67	29.6	4	0.357	0.24	0.773	0.948496	0.893591		22.39	63.42	60.28	183.8	65.6	50.6	9.36	11.04	50.92
1150732186	truncated FRIGIDA-like protein 1 [Asparagus officinalis]	14.561	14	4	19	4	538	59.9	8.54	7.4	4	1.351	1.594	1.179	0.948496	0.910432	0.953876	3.05	6.69	0.42	76.2	102.7	121.1	1.6	4.72	6.13
1150678765	eukaryotic translation initiation factor 3 subunit L [Asparagus officinalis]	20.79	12	4	39	4	377	44.4	6.46	72.43	4	1.51	1.517	1.004	0.948496	0.919199	0.999335	1.87	6.47	4.17	76.5	114.1	109.5	10.59	9.65	8.32
1150673283	delta-aminolevulinic acid dehydratase, chloroplastic-like [Asparagus officinalis]	26.776	15	4	31	4	443	48.7	6.16	76.37	4	0.53	0.599	1.154	0.948496	0.949627	0.940373	3.25	18.88	19.57	138.3	78.8	82.9	6.07	9.16	27.03
1150716092	LOW QUALITY PROTEIN: ABC transporter F family member 4 [Asparagus officinalis]	17.004	12	4	11	4	687	76.9	5.81	2.35	4	1.358	1.064	0.71	0.948496	0.973844	0.879715	22.92	43.16	6.83	84.7	125.2	90.1	29.01	19.48	16.86
1150735660	eukaryotic translation initiation factor 3 subunit F-like [Asparagus officinalis]	37.625	25	4	37	4	289	31.9	5.45	81.84	4	0.521	0.259	0.497	0.948801	0.799123	0.347351	1.16	0.93	0.22	168.6	87.8	43.7	19.1	17.35	18.42
1150744636	LOW QUALITY PROTEIN: splicing factor 3B subunit 3-like [Asparagus officinalis]	26.927	4	4	41	4	1161	128.4	5.33	99.08	4	1.25	1.912	1.558	0.949282	0.737736	0.367577	6.54	21.36	2.68	72	90	138	21.88	9.01	6.36
1150695448	LOW QUALITY PROTEIN: protein argonaute MEL1-like [Asparagus officinalis]	12.652	5	4	10	4	954	106.9	9.17	13.07	4	0.553	0.206	0.385	0.949282	0.776847	0.128891	11.46	0.12	4.85	164.2	96.9	38.9	12.16	10.46	11.63
1150700257	LOW QUALITY PROTEIN: ribulose-phosphate 3-epimerase, cytoplasmic isoform-like [Asparagus officinalis]	37.756	19	4	58	4	217	23.7	6	95.2	4	0.598	0.387	0.816	0.949282	0.874787	0.916613	12.2	27.02	40.27	155.7	93.2	51	10.16	24.86	51.79
1150693393	60S ribosomal protein L37a-1 [Asparagus officinalis]	23.093	45	4	45	2	92	10.3	10.36	87.66	4	0.535	0.293	0.547	0.949282	0.875739	0.530067	13.7	2.39	12.46	162.8	91.2	46	7.5	27.15	8.76
1150707773	7-dehydrocholesterol reductase [Asparagus officinalis]	21.134	10	4	26	4	435	49.4	8.35	56.89	4	0.609	0.441	1.015	0.949282	0.896804	0.995928	15.27	11.34	53.5	155.8	75.5	68.7	14.32	25.18	45.55
1150701262	bifunctional L-3-cyanoalanine synthase/cysteine synthase 2, mitochondrial [Asparagus officinalis]	13.191	17	4	16	4	357	38.6	8.53	26.29	4	1.442	1.678	1.069	0.949282	0.901121	0.988297	13.24	5	18.68	70.6	110.9	118.5	26.04	30.66	44.7
1150669290	protein WEAK CHLOROPLAST MOVEMENT UNDER BLUE LIGHT 1-like [Asparagus officinalis]	20.296	7	4	11	4	916	100.9	5.12	12.14	4	0.414	0.295	0.803	0.949282	0.901273	0.933925	4.17	20.4	54.86	177.1	70.7	52.2	9.02	48.55	25.71
1150701715	SKP1-like protein 1A [Asparagus officinalis]	29.796	25	4	47	1	161	18.3	4.63	107.67	4	0.398	0.299	0.732	0.949282	0.905257	0.916613	22.72	30.16	22.56	180.6	65.4	54	11.27	17.83	16.06
1150668901	protein SUPPRESSOR OF K(+) TRANSPORT GROWTH DEFECT 1 [Asparagus officinalis]	18.062	11	4	26	4	433	48.4	8.37	30.69	4	1.401	1.41	1.006	0.949282	0.92384	0.999123	8.16	41.7	52.76	76.1	111.6	112.3	8.45	12.64	31.82
1150719248	eukaryotic translation initiation factor 3 subunit K [Asparagus officinalis]	20.026	16	4	36	4	225	25.7	5.14	88.06	4	1.177	1.3	1.105	0.949282	0.924432	0.954783	4.61	1.41	6.22	89.2	104.9	105.9	16.08	21.34	11.97
O22647	40S ribosomal protein S16 OS=Fritillaria agrestis OX=64177 GN=RPS16 PE=2 SV=1	43.971	21	4	116	4	145	16.5	10.48	269.74	4	1.316	1.23	0.945	0.949282	0.927637	0.962595	3.95	1.61	5.6	91.8	109	99.2	7.59	17.16	12.9
1150675761	prefoldin subunit 1 [Asparagus officinalis]	19.767	32	4	33	4	129	14.7	5.68	43.01	4	1.156	1.195	0.982	0.949282	0.937183	0.995088	7.83	20.53	5.63	89.2	104.1	106.7	13.44	12.86	4.64
1150724357	dolichyl-diphosphooligosaccharide--protein glycosyltransferase 48 kDa subunit-like [Asparagus officinalis]	30.48	12	4	27	1	444	49	6.05	69.13	4	1.397	1.362	0.86	0.949282	0.948555	0.952824	5.25	3.62	20.58	76	120.4	103.6	18.91	19.71	74.99
1150743210	stearoyl-[acyl-carrier-protein] 9-desaturase 5, chloroplastic-like [Asparagus officinalis]	36.74	19	4	24	3	393	45.1	6.81	51.95	4	0.546	0.581	0.836	0.949282	0.950938	0.918138	0.28	10.62	34.73	144.6	80.5	74.9	11.06	21.49	21.23
1150710088	transmembrane 9 superfamily member 11-like [Asparagus officinalis]	28.198	6	4	24	2	664	74.9	7.21	82.24	4	0.408	0.444	1.089	0.949282	0.967513	0.972144	11.86	1.15	10.79	162.9	64.8	72.3	88.31	18.56	53.44
1150674903	LOW QUALITY PROTEIN: threonine synthase, chloroplastic-like [Asparagus officinalis]	19.522	8	4	35	4	540	59	7.49	77.08	4	1.24	1.056	0.943	0.949282	0.971138	0.97659	0.63	0.5	10.16	95.7	103.3	101	9.3	12.27	3.83
1150708927	LOW QUALITY PROTEIN: guanylate-binding protein 3 [Asparagus officinalis]	17.902	4	4	20	4	1081	121.8	7.53	28.75	4	0.507	0.583	1.151	0.949282	0.974166	0.970388	37.79	28.14	55.42	139.9	74.4	85.7	3.05	27.91	19.51
Q9XF97	60S ribosomal protein L4 OS=Prunus armeniaca OX=36596 GN=RPL4 PE=2 SV=1	25.528	13	4	90	4	408	44.8	10.23	220.36	4	1.279	0.968	0.773	0.949282	0.974473	0.696826	15.37	3.14	6.84	99.3	110.9	89.8	17.29	24.31	16.4
1150676911	spermidine synthase 1-like isoform X2 [Asparagus officinalis]	25.149	12	4	51	1	301	33.6	5.02	141.52	4	0.423	0.561	1.327	0.949282	0.98377		54.08	20.46	38.11	151.2	63.9	84.8	11.72	31.81	5.31
1150718160	probable glutathione S-transferase parA [Asparagus officinalis]	15.762	17	4	20	4	222	25.5	7.27	45.55	4	0.553	0.985	1.783	0.949282	0.983932	0.39609	12.72	37.9	20.05	115.7	66.2	118.1	2.17	18.42	35.65
1150692283	uncharacterized protein LOC109833719 [Asparagus officinalis]	31.641	15	4	59	4	372	40.1	8.07	135.79	4	0.553	0.731	1.184	0.949282	0.983932	0.916613	6.17	22.33	1.98	128.6	79.1	92.3	14.21	20.22	15.38
1150698738	signal recognition particle subunit SRP72-like [Asparagus officinalis]	15.836	9	4	16	4	677	74.2	9.2	29.52	4	1.362	0.85	0.622	0.949282	0.990572	0.549278	0.55	6.02	2.94	107.7	119.5	72.8	15.84	17.97	21.38
1150707480	heat shock factor-binding protein 1-like [Asparagus officinalis]	20.084	46	4	38	3	92	10.1	4.36	52.76	4	0.513	0.793	1.553	0.949282	0.999557	0.753392	0.82	4.04	4.72	131.3	67.4	101.3	16.68	26.67	39.96
1150733213	molybdate-anion transporter-like [Asparagus officinalis]	11.349	6	4	48	4	462	51	8.07	73.15	4	1.113	1.736	1.498	0.952529	0.794318	0.491885	9.12	5.89	15.28	79.4	88.3	132.3	20	41.74	31.45
1150676148	clustered mitochondria protein-like [Asparagus officinalis]	18.573	4	4	28	4	1290	141.3	6.37	35.47	4	1.286	1.688	1.513	0.953804	0.901572	0.56917	1.4	19.89	11.63	76.3	99	124.7	2.82	14.66	16
1150709877	LOW QUALITY PROTEIN: oryzain alpha chain-like [Asparagus officinalis]	37.811	12	4	75	4	472	51.6	5.67	201.23	4	1.106	1.209	1.102	0.955272	0.924521	0.9694	1.05	30.4	1.11	85.7	93.2	121.1	9.99	19.36	21.68
1150731086	ER membrane protein complex subunit 1 [Asparagus officinalis]	24.965	7	4	18	4	982	109.2	7.31	27.41	4	0.481	0.371	0.911	0.955272	0.931854	0.988297	26.97	13.2	17.61	163.2	78.5	58.2	5.87	26.7	21.13
1150669911	LOW QUALITY PROTEIN: protein argonaute 1B-like [Asparagus officinalis]	38.239	7	4	24	1	1075	120.7	9.25	59.38	4	0.456	0.364	0.798	0.955272	0.934163		50.02	20.13	15.83	177.5	57.9	64.6	51.97	45.76	34.32
1150694863	LOW QUALITY PROTEIN: universal stress protein PHOS32-like [Asparagus officinalis]	67.5	15	4	148	4	253	28.2	6.8	409.07	4	1.195	1.122	0.975	0.955272	0.950938	0.987559	22.24	13.54	21.19	92.4	105.1	102.5	10.71	18.4	4.77
1150704621	expansin-like A2 [Asparagus officinalis]	19.68	22	4	13	4	218	23.5	7.99	26.14	4	0.631	0.438	0.693	0.958943	0.903381	0.740158	27.41	1.02	32.38	143.2	98.3	58.5	20.95	44.8	22.43
1150684356	uncharacterized protein LOC109830477 [Asparagus officinalis]	18.845	10	4	22	4	677	74.7	5.14	80.66	4	1.245	1.51	1.136	0.958943	0.910432	0.957611	13.07	8.82	1.04	78.8	102.1	119.1	8.32	8.92	1.88
1150748884	peptidyl-prolyl cis-trans isomerase CYP18-2 isoform X1 [Asparagus officinalis]	20.185	32	4	27	4	164	18.1	8.02	48.92	4	1.235	1.34	1.085	0.958943	0.934058	0.971301	11.36	2.29	2.56	89.5	100.9	109.6	11.57	19.13	14.92
1150734931	LOW QUALITY PROTEIN: ATP sulfurylase 1, chloroplastic-like [Asparagus officinalis]	18.626	11	4	10	2	464	51.7	8.7	15.1	4	1.009	0.89	1.008	0.958943	0.966238	0.995088	0.04	18.52	15.23	103.9	103.6	92.5	21.16	15.15	8.98
1150705635	clathrin light chain 2-like [Asparagus officinalis]	20.944	19	4	20	4	200	22.8	9.74	44.45	4	1.23	1.916	1.462	0.959365	0.877214	0.562189	7.93	16.59	9.75	69.2	98.4	132.5	23.16	15.52	19.85
O82569	Protein translation factor SUI1 homolog OS=Pimpinella brachycarpa OX=45043 PE=3 SV=1	14.227	22	4	14	4	113	12.7	9.03	33.38	4	0.664	0.465	0.755	0.959365	0.903873	0.804575	37.24	23.78	11.6	154.5	83.7	61.9	19.48	47.61	64.29
1150670723	nitrilase-like protein 2 [Asparagus officinalis]	22.641	18	4	20	4	332	36.6	7.43	48.35	4	1.214	1.582	1.303	0.959365	0.905257	0.801183	0.56	4.59	4.02	78.6	95.4	126.1	8.02	7.57	2.51
1150725180	transmembrane 9 superfamily member 3 [Asparagus officinalis]	30.494	9	4	47	4	590	67.6	6.52	93.73	4	1.079	1.372	1.354	0.959365	0.910432	0.696826	13.93	22.26	16.82	85.2	91.8	123	14.26	28.51	27.13
1150681623	uncharacterized protein LOC109829243 isoform X1 [Asparagus officinalis]	22.239	17	4	39	4	325	37.2	6.54	99.48	4	1.226	1.508	1.138	0.959365	0.9214	0.932464	11.9	6.26	5.21	79.9	101.4	118.7	7.41	3.17	14.04
1150672082	protein-lysine N-methyltransferase mettl10 [Asparagus officinalis]	17.627	24	4	13	4	249	27.7	4.75	20.53	4	1.204	1.334	1.18	0.959365	0.933429	0.933542	1.05	10.94	35.15	93.3	94.8	111.9	12.19	21.45	7.52
Q9XER8	Ras-related protein Rab7 OS=Gossypium hirsutum OX=3635 GN=RAB7 PE=2 SV=1	15.26	20	4	28	1	207	23.2	5.49	53.77	4	0.522	0.406	0.778	0.959365	0.934163	0.921803	3.28	38.45	35.97	167.2	74.7	58.1	16.23	31.58	64.61
1150711566	LOW QUALITY PROTEIN: uncharacterized protein LOC109841938 [Asparagus officinalis]	21.146	18	4	18	4	345	37.1	9.61	50.58	4	1.051	1.113	1.059	0.959365	0.962593	0.995088	30.11	33.57	0.12	103.7	94	102.3	19.33	15.43	15.11
1150733609	5'-methylthioadenosine/S-adenosylhomocysteine nucleosidase 2-like, partial [Asparagus officinalis]	29.033	30	4	19	4	249	26.7	4.83	63.26	4	0.648	0.614	1.333	0.959365	0.967513	0.891624	5.84	42.82	3.21	128.5	72.6	98.9	32.88	20.97	59.6
1150736772	dual specificity protein phosphatase 12 isoform X1 [Asparagus officinalis]	18.112	15	4	30	4	357	40	5.83	50.74	4	0.653	0.619	0.918	0.959365	0.967513	0.984819	34.71	4.77	39.29	133.1	87	79.9	5.32	22.88	22.46
1150740822	polyadenylate-binding protein RBP45-like [Asparagus officinalis]	18.203	9	4	25	3	330	36.5	6.79	54.02	4	0.662	0.673	0.828	0.959365	0.982884	0.924379	25.38	17.44	57.4	122.6	97.1	80.4	12.91	18.91	23.76
1150686812	mitochondrial Rho GTPase 1-like [Asparagus officinalis]	15.681	12	4	19	3	512	57.6	7.11	29.77	4	1.029	0.934	0.908	0.959365	0.982884	0.9694	0.35	8.39	18.81	107	110.1	82.8	14.38	18.41	13.19
1150699635	26S proteasome non-ATPase regulatory subunit 13 homolog B [Asparagus officinalis]	21.637	15	4	38	4	387	44	5.31	75.72	4	0.675	0.737	1.093	0.959365	0.98377	0.974307	0.86	20.78	13.12	131.6	88.3	80.1	16.66	20.23	35.88
1150686089	isocitrate dehydrogenase [NAD] regulatory subunit 1, mitochondrial, partial [Asparagus officinalis]	38.433	22	4	43	2	283	30.6	7.43	117.35	4	1.06	0.821	0.789	0.959365	0.992524	0.916613	22.35	5.59	2.71	106	104.2	89.8	7.15	13.54	11.73
1150669005	glyoxylate/succinic semialdehyde reductase 1 [Asparagus officinalis]	35.923	19	4	30	4	293	30.9	5.8	76.39	4	0.666	0.86	1.235	0.959365	0.999557	0.916613	6.41	36.1	30.66	128.3	76.8	94.9	11.41	20.42	47.62
1150668797	probable 2-oxoacid dependent dioxygenase [Asparagus officinalis]	23.664	43	4	10	4	160	18.2	5.1	23.09	4	0.696	0.368	0.7	0.95983	0.869545	0.808935	5.73	5.6	56.05	158	83.9	58.1	43.56	42.97	2.15
1150748401	epidermal growth factor receptor substrate 15-like 1 [Asparagus officinalis]	21.072	10	4	24	4	650	72.1	5.01	15.22	4	1.143	0.736	0.608	0.960709	0.999557	0.596731	6.53	1.52	7.25	104.8	119.7	75.5	6.28	14.84	8.69
1150709807	methylthioribose kinase 1 [Asparagus officinalis]	18.195	13	4	12	4	420	47.9	6.48	24.04	4	1.079	0.651	0.605	0.961668	0.966238	0.170692	14.94	29.46	15.48	122.4	109.1	68.6	24.06	31.38	17.6
1150685425	peroxiredoxin-2E-1, chloroplastic [Asparagus officinalis]	29.136	31	4	36	4	177	18.9	5.43	72.67	4	1.113	1.931	1.754	0.963282	0.77703	0.155546	25.44	2.12	1.6	67.1	80.6	152.3	33	7.57	12.47
1150708709	protein SSUH2 homolog [Asparagus officinalis]	12.806	9	4	15	4	421	47.1	7.12	9.53	4	1.15	1.278	1.112	0.963282	0.937322	0.961683	28.71	9.68	15.94	87.7	104.8	107.6	7.28	22.43	11.12
1150739148	trithorax group protein osa-like [Asparagus officinalis]	32.918	6	4	50	4	1168	127.3	8.21	114.34	4	1.163	1.006	1.004	0.963282	0.98003	0.99536	12.89	7.86	16.84	93.3	108.5	98.3	10.26	28.66	17.73
1150675905	triphosphate tunel metalloenzyme 3 [Asparagus officinalis]	19.458	15	4	17	4	203	22.8	5.1	19.5	4	1.098	1.238	1.127	0.96445	0.941117	0.961473	8.68	27.73	40.44	90.8	96.7	112.5	9.74	2.36	32.81
1150692839	cystathionine gamma-synthase 1, chloroplastic-like [Asparagus officinalis]	12.916	11	4	11	3	524	56.9	6.21	15.2	4	0.982	0.916	0.765	0.96456	0.98377	0.916613	12.44	16.41	48.64	96.3	115.4	88.3	30.24	21.54	73.23
1150735922	tropinone reductase homolog At5g06060-like isoform X3 [Asparagus officinalis]	26.177	24	4	10	1	273	29.2	6.52	23.03	4	0.549	0.32	0.831	0.965972	0.910432	0.953876	37.26	69.86	80.57	169.6	76.3	54.2	26.77	20.46	70
1150748220	UMP-CMP kinase 4-like isoform X1 [Asparagus officinalis]	10.566	21	4	10	2	250	27.8	6.61	11.46	4	1.049	2.424	1.476	0.967259	0.865345	0.859906	16.18	53.52	0.93	68.2	74.8	157	11.27	23.18	61.68
1150677390	ribose-phosphate pyrophosphokinase 4 [Asparagus officinalis]	30.93	19	4	27	4	318	35.4	6.35	78.37	4	0.718	0.482	0.74	0.967259	0.927311	0.882899	11.92	9.41	8.23	133.4	102.1	64.5	5	11.4	15.23
P51846	Pyruvate decarboxylase 2 OS=Nicotiana tabacum OX=4097 GN=PDC2 PE=2 SV=1	35.823	7	4	126	1	614	67	5.96	306.98	4	1.075	0.716	0.642	0.967259	0.978075	0.308394	4.77	19.01	5.39	96.8	123.9	79.2	38.71	31.78	9.6
1150672371	vacuolar protein sorting-associated protein 26A-like [Asparagus officinalis]	14.424	16	4	15	1	302	35.2	6.93	19.07	4	0.543	0.5	1.015	0.967259	0.98003	0.995088	15.22	14.84	26.06	150.2	81.6	68.2	10.88	21.17	39.42
1150687450	60S ribosomal protein L18-2-like isoform X2 [Asparagus officinalis]	27.773	25	4	55	1	184	20.6	11.17	160.36	4	0.672	0.728	1.513	0.967259	0.990905	0.752932	5.31	8.09	1.73	125.4	83.3	91.3	4.23	18.92	26.75
1150683586	beta-adaptin-like protein B [Asparagus officinalis]	17.871	6	4	28	4	895	99.2	5.25	63.7	4	0.983	1.101	1.117	0.967341	0.949627	0.955142	2.09	0.29	1.81	96.8	96.6	106.6	16.5	21.21	12.5
1150683369	LOW QUALITY PROTEIN: chromatin assembly factor 1 subunit A-B-like [Asparagus officinalis]	17.136	10	4	9	4	413	46.6	6.89	11.21	4	1.093	0.812	0.732	0.967341	0.999557	0.869414	2.38	7.78	26.32	103.8	115.3	80.9	7.98	14.62	13.78
1150698610	nascent polypeptide-associated complex subunit beta-like [Asparagus officinalis]	48.681	37	4	77	3	208	22.9	6.24	265.65	4	1.05	0.815	0.901	0.967341	0.999557	0.918093	0.59	18.73	2.71	113.8	97.5	88.7	13.91	12.65	2.97
1150712334	phenylalanine--tRNA ligase alpha subunit, cytoplasmic-like isoform X1 [Asparagus officinalis]	16.152	7	4	14	4	499	57.4	7.39	9.91	4	0.682	0.693	1.189	0.968257	0.985953	0.936291	25.22	22.99	24.11	127	92	81	17	35.06	50.31
1150733239	SH3 domain-containing protein 2 [Asparagus officinalis]	31.331	18	4	19	4	371	41.4	6.47	37.94	4	1.013	0.744	0.703	0.969429	0.999672	0.822471	6.57	67.53	62.67	107.4	112.7	79.9	20.81	19.47	31.41
1150692721	DNA ligase 1-like [Asparagus officinalis]	29.075	19	4	43	4	259	29.3	5.25	77.88	4	0.713	0.696	0.976	0.969603	0.982884	0.995088	1.54	15.7	20.55	124.5	88.8	86.7	8.53	10.7	8.69
1150734232	LOW QUALITY PROTEIN: uncharacterized protein LOC109819686 [Asparagus officinalis]	23.617	6	4	42	4	1155	125.6	5.74	74.8	4	0.99	1.088	1.1	0.973541	0.962593	0.973793	42.44	7.57	0.11	90.3	99.9	109.8	12.09	22.82	13.17
Q7XYT0	Farnesyl diphosphate synthase 2 OS=Artemisia spiciformis OX=235357 GN=FDS-2 PE=1 SV=1	17.042	12	4	28	1	342	39.6	5.87	65.28	4	0.746	0.666	1.145	0.973541	0.973844	0.954783	7.31	50.24	61.99	124.6	93	82.4	6.58	20.36	62.69
1150680831	uncharacterized protein At4g28440 [Asparagus officinalis]	31.406	28	4	26	4	137	15.2	8.12	59.35	4	0.97	0.401	0.632	0.975174	0.860724	0.290018	8.88	54.01	1.23	135	110.9	54.1	19.89	30.37	20.92
1150683994	protein disulfide isomerase-like 5-2 [Asparagus officinalis]	25.85	18	4	55	4	439	49.7	5.16	71.71	4	1.081	1.332	1.261	0.975174	0.934163	0.916613	20.27	8.94	12	87.3	98.5	114.2	7.09	19.38	12.88
1150701179	uncharacterized protein LOC109837523 [Asparagus officinalis]	31.564	24	4	57	4	157	17.5	9.91	131.23	4	0.96	1.082	1.087	0.975174	0.95698	0.972144	8.35	3.29	6.99	102.1	94.8	103	7.32	16.02	7.76
1150687213	superoxide dismutase [Cu-Zn] 2 [Asparagus officinalis]	92.987	44	4	259	2	151	15.1	6.1	934.84	4	0.75	0.664	0.924	0.975174	0.966279	0.94475	0.56	9.42	6.6	124.2	93.2	82.5	0.67	6.7	35.92
1150669822	E3 ubiquitin-protein ligase UPL3, partial [Asparagus officinalis]	28.153	3	4	21	4	1774	191.3	5.81	17.04	4	0.917	0.907	0.892	0.975174	0.983298	0.972144	0.62	8.1	22.41	109.7	100.5	89.7	17.3	13.66	11.27
1150699921	LOW QUALITY PROTEIN: pyruvate dehydrogenase E1 component subunit alpha-3, chloroplastic [Asparagus officinalis]	19.551	12	4	22	4	341	37.7	6.2	51.02	4	0.744	0.749	0.929	0.975174	0.987613	0.98317	11.42	7.48	18.33	131.5	81.8	86.7	11.97	21.09	31.27
1150689119	LOW QUALITY PROTEIN: protein CELLULOSE SYNTHASE INTERACTIVE 1-like [Asparagus officinalis]	14.53	2	4	11	4	2145	228.9	5.54	7.99	4	0.581	0.733	1.261	0.975174	0.999557	0.929905	2.87	26.91	0.12	129.6	75.3	95.1	13.37	25.27	41.98
1150733380	peptidyl-prolyl cis-trans isomerase FKBP12 [Asparagus officinalis]	27.62	31	4	27	4	112	12	7.85	32.99	4	1.018	0.759	0.746	0.982147	0.983932	0.734069	5.47	0.57	4.87	108	110	82	20.19	27.17	23.15
1150672774	vacuolar protein sorting-associated protein 32 homolog 2-like [Asparagus officinalis]	30.088	26	4	24	4	218	24.3	4.89	51.64	4	0.614	0.52	0.92	0.98404	0.969629	0.984408	11.87	27.52	5.81	137.9	92	70	7.93	11.76	18.85
1150748489	binding partner of ACD11 1-like isoform X1 [Asparagus officinalis]	21.376	16	4	52	2	256	27.7	6.62	105.96	4	1.03	1.029	1.006	0.986803	0.967513	0.998848	1.1	5.53	4.84	91.4	104	104.6	8.73	17.74	21.5
1150696287	LOW QUALITY PROTEIN: probable clathrin assembly protein At4g32285, partial [Asparagus officinalis]	25.061	12	4	25	4	613	67.4	5.39	40.27	4	1.042	1.427	1.37	0.987812	0.923441	0.799301	4.88	13.11	17.42	88.3	92	119.7	23.96	27.3	15.35
1150679351	uncharacterized protein LOC109825892 [Asparagus officinalis]	28.578	23	4	29	4	161	17.5	8.84	76.04	4	0.727	0.484	0.689	0.989903	0.905257	0.446467	32.77	4.94	16.51	137.4	99.9	62.7	5.07	20.68	6.05
1150678851	mediator of RNA polymerase II transcription subunit 36a-like [Asparagus officinalis]	17.598	19	4	32	2	306	32.3	10.2	72.97	4	0.637	0.67	1.072	0.989903	0.990905	0.990806	2.75	13.1	36.99	126.8	83.6	89.6	12.53	18.56	20.69
1150695119	20 kDa chaperonin, chloroplastic-like [Asparagus officinalis]	39.243	23	4	49	4	375	40.3	6.46	135.16	4	0.719	0.528	0.735	0.991268	0.929358	0.62641	23.2	0.18	14.63	127.9	99.2	72.9	6.25	19.52	7.02
Q96254	Guanosine nucleotide diphosphate dissociation inhibitor 1 OS=Arabidopsis thaliana OX=3702 GN=GDI1 PE=1 SV=1	32.542	15	4	40	1	445	49.8	5.74	121.49	4	0.852	1.241	1.419	0.991268	0.933429	0.881176	3.88	62.87	12.59	103.2	68.6	128.1	29.44	23.22	76.33
1150710190	chaperone protein ClpB3, mitochondrial [Asparagus officinalis]	25.899	5	4	23	2	915	102.5	6.21	53.63	4	0.625	0.51	0.806	0.991268	0.97021	0.933925	7.95	6.23	1.8	143.9	86.5	69.6	8.97	9.07	14.91
1150748297	(+)-neomenthol dehydrogenase-like isoform X3 [Asparagus officinalis]	15.122	9	4	42	4	305	33.1	5.45	111.72	4	0.939	0.923	0.934	0.991268	0.98003	0.953876	2.95	8.24	4.63	103.5	101.6	94.9	16.54	11.93	17.37
1150743228	protein TIC 40, chloroplastic-like [Asparagus officinalis]	18.309	18	4	5	3	470	50.6	7.15	3.99	4	0.907	0.644	0.717	0.991268	0.999557	0.916613	15.57	35.36	19.03	119.7	103.3	77	7.85	25.01	29.68
1150701346	calreticulin-3-like [Asparagus officinalis]	17.183	7	4	51	2	434	51.3	7.28	116.74	4	0.746	1.398	2.441	0.991757	0.919359	0.077071	46.49	25.4	70.13	96.1	71.7	132.2	11.31	69.85	17.48
1150725297	transmembrane 9 superfamily member 2-like [Asparagus officinalis]	16.675	9	4	24	4	587	67.3	6.86	14.51	4	0.882	1.274	1.424	0.991757	0.938742	0.801183	2.12	9.86	12.15	94.7	84.7	120.6	15.27	20.19	33.48
1150693049	ras-related protein Rab11D-like [Asparagus officinalis]	18.588	22	4	32	3	218	24	7.96	67.89	4	0.996	0.549	0.744	0.991757	0.962593	0.883994	51.97	59.01	46.99	119.5	119.1	61.4	10.33	148.04	51.36
1150668854	far upstream element-binding protein 1-like isoform X1 [Asparagus officinalis]	31.094	11	4	33	4	689	73.1	4.94	67.38	4	0.799	1.064	1.304	0.991757	0.978244	0.833308	1.83	9.78	3.09	104.1	84	111.8	7.91	12.1	14.05
1150698529	LOW QUALITY PROTEIN: putative quinone-oxidoreductase homolog, chloroplastic [Asparagus officinalis]	38.161	19	4	38	4	324	33.9	8.32	106.89	4	0.73	0.682	1.041	0.991757	0.98003	0.991058	11.47	5.18	20.99	124.8	87	88.2	4.1	13.31	11.99
1150684548	3-isopropylmalate dehydratase large subunit, chloroplastic [Asparagus officinalis]	24.447	9	4	29	4	501	54.9	7.52	78.9	4	0.905	0.833	0.731	0.991757	0.985953	0.865978	38.68	10.24	33.63	107.3	103.4	89.4	5.4	25.69	20.77
1150707674	LOW QUALITY PROTEIN: splicing factor 3B subunit 1-like [Asparagus officinalis]	22.399	4	4	19	4	1272	141.9	6.43	25.83	4	0.986	0.717	0.674	0.991757	0.987613	0.766248	10.14	4.53	18.34	110.6	110.1	79.3	1.68	8.24	10.44
1150709810	probable glutamyl endopeptidase, chloroplastic [Asparagus officinalis]	16.911	6	4	18	4	938	105	6.19	22.84	4	0.658	0.741	1.126	0.991757	0.999716	0.97878	36.37	6.36	54.52	122.1	83.7	94.2	6.27	23.58	16.52
1150686439	LOW QUALITY PROTEIN: protein FREE1 [Asparagus officinalis]	21.401	8	4	18	4	539	58.8	6.87	16.64	4	0.671	0.725	0.752	0.991915	0.999557	0.916613	30.24	36.58	51.27	124.7	74.8	100.5	10.84	57.59	34.61
1150747304	LOW QUALITY PROTEIN: fructokinase-1-like [Asparagus officinalis]	23.657	18	4	26	3	313	34	5.03	59.12	4	0.68	2.992	4.25	0.993913	0.704635	0.000444113	25.64	48.6	5.23	56.5	46.4	197.1	58.48	37.41	23.59
1150689162	probable beta-D-xylosidase 7 [Asparagus officinalis]	12.005	5	4	20	4	771	84.4	7.56	43.57	4	0.771	0.396	0.54	0.993913	0.875739	0.165593	18.62	12.36	7.53	146.4	100.2	53.5	7.62	17.22	47.91
P55307	Catalase isozyme 1 OS=Hordeum vulgare OX=4513 GN=CAT1 PE=2 SV=1	40.165	12	4	98	1	492	56.6	7.17	274.99	4	0.819	1.671	2.042	0.993913	0.901572	0.374815	104.78	32.8	73.71	86	70.4	143.7	49.11	50.17	17.98
1150744273	LOW QUALITY PROTEIN: multiple organellar RNA editing factor 1, mitochondrial-like [Asparagus officinalis]	19.282	25	4	22	4	405	44.3	7.49	43.69	4	0.78	0.513	0.657	0.993913	0.919199	0.350944	4.29	11.93	7.86	154.9	85.6	59.4	20.65	23.16	56.87
1150740465	uncharacterized protein At2g34160-like [Asparagus officinalis]	17.096	26	4	21	1	129	14.2	6	35.81	4	0.666	0.329	0.494	0.993913	0.92384	0.450813	15.37	42.86	24.9	160.6	96.9	42.5	13.07	33.42	53.31
1150712416	probable methionine--tRNA ligase [Asparagus officinalis]	23.699	9	4	9	3	831	93.2	7.61	13.33	4	0.674	0.414	0.552	0.993913	0.942726	0.602632	11.88	32.28	44.14	149.9	101	49.1	20.4	11.42	34.23
Q9FIK7	Probable acetyl-CoA acetyltransferase, cytosolic 2 OS=Arabidopsis thaliana OX=3702 GN=At5g47720 PE=2 SV=1	15.331	13	4	36	1	415	43.3	6.43	82.39	4	0.631	0.38	0.602	0.993913	0.949627	0.761343	11.85	110.42	38.56	151.4	92.8	55.8	11.14	26.03	102.9
1150725287	ATP-dependent Clp protease proteolytic subunit-related protein 3, chloroplastic-like [Asparagus officinalis]	20.556	16	4	22	4	256	28.5	6.57	45.07	4	0.979	0.617	0.639	0.993913	0.966919	0.617175	0.43	21.61	19.81	116.2	112.2	71.7	3.87	3.74	13.88
1150692448	LOW QUALITY PROTEIN: probable inactive receptor kinase At1g48480 [Asparagus officinalis]	18.189	11	4	35	4	631	66.9	8.59	45.31	4	0.698	1.017	1.456	0.993913	0.973844	0.859906	10.3	11.12	0.05	124.2	72.9	102.8	14.88	21.63	26.91
1150685200	probable bifunctional methylthioribulose-1-phosphate dehydratase/enolase-phosphatase E1 1 [Asparagus officinalis]	27.686	16	4	24	4	491	54.2	6.71	54.76	4	0.779	0.981	1.425	0.993913	0.98003	0.79268	19.9	19.92	17.38	110.9	78	111.1	24.09	39.32	18.58
1150744878	cytochrome c [Asparagus officinalis]	18.76	32	4	36	2	113	12.3	9.31	77.59	4	0.94	0.901	0.973	0.993913	0.983932	0.995088	5.3	7.5	22.3	109.6	91.6	98.7	7.52	12.9	18.35
1150717448	nucleosome assembly protein 1;2-like isoform X1 [Asparagus officinalis]	12.994	12	4	28	2	386	44.1	4.45	52.78	4	0.663	0.806	1.163	0.993913	0.996327	0.952824	10.15	20.23	6.76	128.3	79.5	92.2	10.67	23.3	24.28
1150735938	triosephosphate isomerase, cytosolic-like isoform X1 [Asparagus officinalis]	16.963	14	4	33	1	283	30.6	7.72	64.95	4	0.781	1.772	2.268	0.994359	0.860724	0.281397	131.67	66.13	112.15	102	48.8	149.2	42.5	147.39	70.39
1150669420	glutathione synthetase, chloroplastic [Asparagus officinalis]	24.311	12	4	40	1	476	52.9	5.73	71.62	4	0.654	0.29	0.738	0.994359	0.904244		1.49	68.4	57.51	138.6	90.6	70.9	60.77	4.22	45.92
1150718174	peroxidase 30-like [Asparagus officinalis]	46.72	14	4	41	4	325	35	8.22	108.16	4	0.901	2.135	2.368	0.996716	0.711948	0.00446425	19.78	6.83	25.7	74.2	67.5	158.4	9.47	7.17	14.55
1150732341	LOW QUALITY PROTEIN: UDP-D-apiose/UDP-D-xylose synthase 2-like [Asparagus officinalis]	23.791	14	4	34	4	395	43.9	6.25	83.64	4	0.918	1.289	1.403	0.996716	0.950938	0.603444	2.27	4.04	17.89	93.6	85.9	120.5	25.96	18.86	30.3
Q39193	Serine/threonine-protein kinase SRK2I OS=Arabidopsis thaliana OX=3702 GN=SRK2I PE=1 SV=1	25.789	9	4	35	2	361	41.1	4.98	102.51	4	0.72	0.954	1.239	0.996716	0.966238	0.918093	13.75	10.19	51.69	102.9	99	98.1	22.94	47.33	13.53
1150718924	superoxide dismutase [Cu-Zn] 2-like [Asparagus officinalis]	30.48	38	4	44	4	163	16.5	6.84	100.33	4	0.9	0.77	0.761	0.996716	0.983932	0.797418	12.99	18.16	8.02	108.3	108.7	83	8.86	10.83	10.05
1150698385	LOW QUALITY PROTEIN: subtilisin-like protease SBT1.9 [Asparagus officinalis]	28.068	8	4	20	4	740	79.4	8.28	58.66	4	0.88	0.948	0.98	0.996716	0.985953	0.995088	24.71	2.22	13.58	105	98.4	96.5	8.35	23.17	4.47
1150735928	tropinone reductase homolog At5g06060-like isoform X6 [Asparagus officinalis]	28.585	24	4	10	1	273	29.2	6.79	25.51	4	0.744	0.805	1.083	0.996716	0.992226	0.990161	6.93	16.77	8.1	115.7	88.5	95.8	4.32	8.7	39.2
1150724754	probable N-acetyl-gamma-glutamyl-phosphate reductase, chloroplastic isoform X1 [Asparagus officinalis]	20.004	14	4	24	4	398	43.8	8.28	36.2	4	0.907	0.209	0.231	0.997415	0.67655	0.00035924	5.25	7.71	26.83	143.8	126.9	29.3	3.84	18.77	6.83
1150681330	uncharacterized protein LOC109829145 [Asparagus officinalis]	15.909	13	4	40	4	467	51.4	9.44	71.73	4	0.882	1.02	0.991	0.997789	0.982884	0.998638	3.45	1.44	8.29	101.7	102.3	96	15.84	19.19	8.91
Q9SFU1	60S ribosomal protein L13a-1 OS=Arabidopsis thaliana OX=3702 GN=RPL13AA PE=2 SV=1	37.154	17	4	62	2	206	23.5	10.4	151.87	4	0.889	0.892	1.074	0.998724	0.990905	0.98762	9.32	38.06	9.86	107.9	95.9	96.2	11.42	8.14	18.99
1150709671	uncharacterized protein LOC109841042 [Asparagus officinalis]	27.846	43	4	55	4	90	10	9.41	162.44	4	0.848	0.585	0.69	0.998788	0.949457	0.42863	7.24	10.01	2.64	117.4	108	74.6	8.62	7.91	12.67
1150734434	heterogeneous nuclear ribonucleoprotein R-like isoform X1 [Asparagus officinalis]	18.831	8	4	11	4	478	52.6	5	18.68	4	0.894	0.727	1.24	0.998788	0.98003	0.916613	38.69	5.62	10.23	114.4	102.3	83.3	6.3	33.25	28.61
1150738669	uncharacterized protein LOC109821672, partial [Asparagus officinalis]	12.594	38	4	15	4	64	7.1	6.79	27.52	4	0.808	0.71	0.878	0.999709	0.98377	0.916613	0.79	19.36	18.47	113.8	99.1	87.1	5.61	5.9	21.32
Q43191	Probable linoleate 9S-lipoxygenase 5 OS=Solanum tuberosum OX=4113 GN=LOX1.5 PE=2 SV=1	21.046	5	4	92	1	862	97.7	5.81	219.45	4	1.542	19.728	7.685		0.0393351	6.01427e-06	98.52	104.32	88.25	14.6	19.9	265.5	88.3	55.83	60.68
1150730640	cell wall protein IFF6-like isoform X1 [Asparagus officinalis]	37.388	17	5	48	5	364	39	8.73	93.1	5	8.314	11.316	1.327	0.00224588	0.000773353	0.786485	14.04	27.36	3.84	13.8	121.2	165	6.72	26.61	29.24
1150748198	60S ribosomal protein L10a-like [Asparagus officinalis]	25.997	17	5	79	2	219	24.8	10.01	175.43	5	7.814	6.746	1.081	0.0116081	0.0957542	0.986947	29.83	22.84	48.08	17	132.7	150.3	57.98	19.81	25.48
1150676757	nucleoside diphosphate kinase 3-like [Asparagus officinalis]	61.66	27	5	96	1	237	25.9	9.04	292.56	5	0.045	0.092	1.211	0.0206723	0.501607		5.02	6.92	53.86	268.6	12.1	19.2	13.91	17.25	47.24
1150744566	ras-related protein RABA2a [Asparagus officinalis]	19.78	24	5	51	1	216	23.8	5.52	127.96	5	12.442	39.004	1.778	0.0340697	0.0120985	0.559416	38.12	51.95	61.71	6	74.3	219.8	20.1	40.84	56.79
1150681675	LOW QUALITY PROTEIN: aspartic proteinase oryzasin-1-like [Asparagus officinalis]	26.586	12	5	29	3	504	54.5	7.18	59.29	5	0.089	0.09	1.084	0.0765975	0.316569	0.973629	37.04	9.84	44.42	253.3	26.2	20.5	16.63	37.14	23.25
1150724122	NADH dehydrogenase [ubiquinone] iron-sulfur protein 8-A, mitochondrial [Asparagus officinalis]	17.545	36	5	31	1	147	17.1	5.06	71.32	5	0.082	0.075	0.921	0.077909	0.269824	0.990161	14.46	91.95	70.61	259.5	23.7	16.8	17.73	47.5	100.25
1150716119	soluble inorganic pyrophosphatase-like [Asparagus officinalis]	43.842	42	5	42	3	211	24	6.3	122.67	5	0.142	0.059	0.333	0.088518	0.0228274	0.0754592	28.81	24.02	9.08	249	35.2	15.7	5.16	30.26	18.51
O49513	Ras-related protein RABA1e OS=Arabidopsis thaliana OX=3702 GN=RABA1E PE=2 SV=1	17.118	18	5	49	1	217	24.3	6.14	120.63	5	7.319	9.824	0.896	0.14967	0.237715	0.960679	31.57	30.2	49.29	19	120	161	9.7	51.91	56.59
1150678135	glutathione S-transferase F10-like [Asparagus officinalis]	42.663	32	5	21	5	222	25.3	7.97	61.25	5	0.184	0.077	0.324	0.161096	0.0256096	0.0310242	15.25	28.78	11.63	239.9	46.2	13.9	35.29	39.74	21.05
1150709907	ESCRT-related protein CHMP1B [Asparagus officinalis]	22.538	18	5	34	5	203	22.6	8.03	58.28	5	3.147	2.148	0.708	0.203127	0.706032	0.494018	0.36	0.66	6.31	47	148.1	104.9	27.88	34.33	27.51
Q9SLY8	Calreticulin OS=Oryza sativa subsp. japonica OX=39947 GN=CRO1 PE=1 SV=2	67.653	16	5	101	1	424	48.3	4.63	212.48	5	6.448	18	1.936	0.206234	0.0850666	0.317901	58.44	44.85	8.57	11	91	198	48.64	32.93	17.16
1150702026	glutathione S-transferase F10-like [Asparagus officinalis]	21.664	35	5	10	5	225	25.4	8.25	28.16	5	0.175	0.149	0.897	0.225671	0.377391	0.990161	35.53	41.43	34.53	235.8	33.9	30.4	35.31	33.11	8.6
Q42899	Glutamine synthetase cytosolic isozyme OS=Lotus japonicus OX=34305 GN=GLN1 PE=2 SV=2	27.985	14	5	44	2	356	39.1	5.73	73.91	5	4.572	9.077	1.986	0.241399	0.163553	0.25661	79.31	67.93	21.35	17	104.8	178.2	96.2	33.06	46.48
1150720078	probable peroxygenase 5 [Asparagus officinalis]	46.241	24	5	63	5	226	25.7	7.94	129.66	5	0.223	0.108	0.402	0.2918	0.0489959	0.0945761	1.98	18.08	24.41	221.7	54.2	24.1	10.38	10.24	31.99
1150748850	polygalacturonase non-catalytic subunit AroGP2-like [Asparagus officinalis]	36.71	23	5	32	5	283	32.6	6.58	70.61	5	2.9	2.35	0.814	0.32043	0.704635	0.809784	4.96	21.32	0.61	47.6	139.2	113.3	34.73	17.35	21.15
1150738763	60S ribosomal protein L17-like [Asparagus officinalis]	37.088	42	5	43	4	144	16.3	10.13	83.92	5	0.219	0.269	1.225	0.340702	0.690121	0.93849	0.49	11.66	9.34	209.7	38.7	51.6	13.21	17.57	18.69
1150716035	reticulon-like protein B4 [Asparagus officinalis]	50.653	29	5	78	3	262	29.4	8.46	164.72	5	0.248	0.308	1.421	0.379072	0.749839	0.801183	11.97	62.08	56.56	194.2	52.4	53.4	22.86	27.2	50.85
1150710298	probable protein phosphatase 2C 60 [Asparagus officinalis]	42.817	21	5	54	5	367	40.3	5.15	79.7	5	2.661	3.672	1.38	0.399286	0.241194	0.689682	10.28	27.47	16.07	45.7	109	145.3	18.32	14.45	15.14
1150732878	LOW QUALITY PROTEIN: NADP-dependent glyceraldehyde-3-phosphate dehydrogenase [Asparagus officinalis]	39.716	13	5	44	2	482	51.6	6.27	93.4	5	0.186	0.22	1.181	0.399286	0.766954	0.946676	17.37	75.94	48.72	213.3	39.7	46.9	6.52	10.33	59.58
P68429	Histone H3.2 OS=Medicago sativa OX=3879 GN=H3-1.1 PE=1 SV=2	18.623	35	5	42	2	136	15.3	11.3	81.88	5	3.228	2.274	0.704	0.41238	0.721767	0.916613	10.83	16.44	85.47	73.7	112	114.3	45.12	64.75	47.19
1150686221	LOW QUALITY PROTEIN: exportin-2 [Asparagus officinalis]	28.324	7	5	29	5	951	104.9	5.92	75.38	5	0.243	0.164	0.747	0.418033	0.400041	0.916613	38.83	32.43	16.08	217.9	49.1	33.1	21.95	60.44	54.41
1150671279	probable aldo-keto reductase 2 [Asparagus officinalis]	35.704	26	5	29	5	257	28.5	5.91	68.63	5	0.259	0.28	1.338	0.489017	0.742879	0.916613	49.26	61.35	11.98	188.4	48.9	62.7	13.64	23.1	41.22
A2YMC6	Probable histone H2A.2 OS=Oryza sativa subsp. indica OX=39946 GN=OsI_025469 PE=3 SV=1	18.795	60	5	53	1	135	14	10.23	84.26	5	3.605	1.152	0.176	0.526655	0.949627	0.00241595	137.43	8.02	8.84	44.6	201.2	54.2	62.85	90.39	29.44
Q9FX83	NADH dehydrogenase [ubiquinone] iron-sulfur protein 8-B, mitochondrial OS=Arabidopsis thaliana OX=3702 GN=At1g16700 PE=1 SV=1	12.712	23	5	26	1	222	25.4	5.29	56.22	5	0.18	0.114	0.878	0.570313	0.608349	0.973629	47.52	28.88	57.6	229.6	43.1	27.3	12.45	48.82	102.31
1150727560	endo-1,3;1,4-beta-D-glucanase [Asparagus officinalis]	34.3	31	5	28	5	238	25.6	6.07	66.87	5	0.285	0.204	0.611	0.57307	0.560351	0.706462	12.05	15.89	8.3	204.5	53.9	41.7	10.57	30.15	23.15
1150740690	cysteine proteinase inhibitor 1-like [Asparagus officinalis]	41.693	33	5	42	5	223	24.5	9.29	91.16	5	2.165	1.549	1.117	0.582336	0.875739	0.960679	35.59	57.78	53.26	50	134.2	115.8	38.78	74.48	61.01
1150675350	17.0 kDa class II heat shock protein-like [Asparagus officinalis]	53.457	47	5	82	5	160	18	6.6	211.29	5	0.362	0.317	0.876	0.617549	0.614333	0.916613	15.52	44.4	26.15	178.8	64.6	56.6	8.91	24.28	45.85
1150695725	ruvB-like 2 [Asparagus officinalis]	19.535	9	5	25	5	682	73.6	5.02	26.6	5	0.245	0.202	0.776	0.620089	0.69463	0.921527	8.82	44.12	32.67	212.2	44.4	43.4	9.27	19.7	111.28
1150737530	adenylosuccinate synthetase, chloroplastic-like [Asparagus officinalis]	31.069	17	5	20	5	442	48.6	7.84	55.6	5	0.297	0.518	1.409	0.622519	0.928234	0.848624	14.97	32.66	6.68	165.5	49.7	84.8	6.64	31.32	22.86
1150701672	DNA-binding protein MNB1B-like [Asparagus officinalis]	28.063	29	5	61	2	144	16	8.87	116.78	5	0.301	0.147	0.487	0.631101	0.312171	0.289085	42.02	22.37	27.43	207.1	62.4	30.4	4.68	68.72	35.11
1150676993	heat shock factor-binding protein 1-like [Asparagus officinalis]	26.768	45	5	33	4	92	9.9	4.31	89.5	5	0.328	0.397	1.207	0.654925	0.875739	0.918093	3.28	15.36	10.95	162.1	58.7	79.2	15.94	16.14	22.15
1150674901	eukaryotic translation initiation factor 5-like [Asparagus officinalis]	43.552	14	5	45	5	440	47.6	5.5	74.71	5	2.255	2.243	0.995	0.674487	0.794864	0.995088	13.68	37.92	22.32	60.9	124.7	114.4	31.18	26.42	26.25
1150686093	LOW QUALITY PROTEIN: uncharacterized protein LOC109831306 [Asparagus officinalis]	20.489	12	5	24	5	647	70.5	5.62	50.95	5	0.341	0.584	2.13	0.738877	0.953788	0.288398	16.54	65.25	40.87	171.4	58.4	70.2	19.11	32.85	61.5
1150743008	probable V-type proton ATPase subunit H [Asparagus officinalis]	27.294	13	5	32	5	452	51.3	6.93	37.72	5	0.351	0.942	2.53	0.747686	0.986255	0.0573676	21.59	13.76	52.64	139.5	48.9	111.5	17.38	39.31	39.33
1150743170	serine/threonine-protein kinase SAPK7-like [Asparagus officinalis]	30.804	13	5	42	3	360	41.2	6.54	122.01	5	2.377	2.765	1.06	0.748547	0.716204	0.986947	0.56	20.57	37.64	47.1	122.8	130.2	15.81	15.39	17.55
1150676514	1-aminocyclopropane-1-carboxylate oxidase 1-like [Asparagus officinalis]	23.754	26	5	16	5	298	34.2	6.11	21.18	5	0.262	0.329	1.098	0.753781	0.875739	0.97878	10.42	45.09	18.2	187.8	53.5	58.7	46.33	37.62	101.44
1150712957	mitochondrial import receptor subunit TOM40-1-like [Asparagus officinalis]	41.993	27	5	38	3	325	36.3	7.15	89.18	5	0.31	0.349	1.051	0.771298	0.901572	0.995088	75.63	10.68	24.36	172.2	62.3	65.5	24.45	41.14	5.93
1150677485	probable methyltransferase PMT3 [Asparagus officinalis]	31.013	13	5	35	1	620	70.9	6.16	86.36	5	2.303	5.195	0.859	0.787708	0.249265	0.962595	89.77	91.77	125.97	48.4	135.3	116.3	74.68	52.21	69.11
1150702484	beta-galactosidase 3 [Asparagus officinalis]	49.954	11	5	75	5	849	94.5	6.47	115.31	5	1.821	1.32	0.775	0.79136	0.905257	0.746361	16.01	1.82	11.37	71.5	130.2	98.3	4.07	9.03	4.76
1150731758	uric acid degradation bifunctional protein TTL-like [Asparagus officinalis]	28.101	52	5	29	5	147	16.9	5.9	70.17	5	0.377	0.393	1.082	0.803841	0.875739	0.977516	5.42	36.51	22.08	171.7	64.6	63.7	5.82	13.39	35.47
1150669268	putative 4-hydroxy-4-methyl-2-oxoglutarate aldolase 2 [Asparagus officinalis]	14.396	30	5	30	2	168	18.1	6.18	31.61	5	0.35	0.227	0.903	0.813659	0.733592	0.972144	15.94	53.39	30.91	184.8	69.9	45.3	4.69	48.42	40.33
1150746481	dolichyl-diphosphooligosaccharide--protein glycosyltransferase subunit 2-like [Asparagus officinalis]	33.658	10	5	37	5	692	75.5	7.09	75.63	5	0.403	0.384	0.906	0.822816	0.862681	0.963126	4.48	12.71	10.16	165.9	70.4	63.8	6.92	11.77	31.34
1150718517	glyceraldehyde-3-phosphate dehydrogenase GAPCP2, chloroplastic-like [Asparagus officinalis]	20.775	13	5	197	1	423	44.5	8.7	327.14	5	0.232	0.469	2.652	0.832978	0.98003	0.123898	27.56	44.7	13.85	171.8	47.6	80.6	11.61	23.78	70.07
1150725299	LOW QUALITY PROTEIN: H/ACA ribonucleoprotein complex subunit 4-like [Asparagus officinalis]	31.909	13	5	32	5	573	64.1	9.25	68.74	5	2.041	1.942	0.936	0.833881	0.875739	0.971938	15.4	33.04	12.66	61.8	118.2	120	5.65	14.41	18.15
1150717299	oryzain gamma chain-like [Asparagus officinalis]	63.734	15	5	98	5	360	39.5	6.54	284.58	5	1.72	1.768	1.027	0.840768	0.799919	0.998638	13.44	7.68	3.87	61.7	119.1	119.2	10.64	13.97	11.64
1150735648	late embryogenesis abundant protein 1-like [Asparagus officinalis]	103.558	61	5	231	5	87	8.9	7.24	715.1	5	1.718	0.847	0.513	0.842865	0.999557	0.0451182	5.68	20.95	12.69	79.1	141.6	79.4	53.83	53.99	42.46
Q01297	Catalase isozyme 1 OS=Ricinus communis OX=3988 GN=CAT1 PE=2 SV=2	30.964	10	5	98	1	492	56.4	7.47	238.58	5	1.914	3.842	1.733	0.849511	0.608793	0.442434	17.38	1.78	22.03	44.9	82.5	172.6	13.01	16.47	28.26
1150697669	probable aquaporin PIP2-2 [Asparagus officinalis]	66.238	32	5	78	4	287	30.6	7.42	252.69	5	0.469	0.31	0.746	0.852226	0.587928	0.620522	5.27	0.23	19.46	168.7	79.1	52.2	23.98	31.09	72.72
1150709032	PITH domain-containing protein 1 [Asparagus officinalis]	24.969	38	5	21	5	204	22.8	5.54	47.43	5	1.631	1.494	0.916	0.859117	0.901572	0.950354	1.32	0.09	1.41	73.4	117	109.6	5.3	3.17	3.89
1150716404	KH domain-containing protein HEN4-like [Asparagus officinalis]	32.45	11	5	50	5	685	74.4	8.22	113.15	5	0.422	0.587	1.389	0.870293	0.950437	0.561176	9.35	15.84	53.69	148.1	58.8	93	13.71	37.08	20.97
1150693091	protein CutA 1, chloroplastic [Asparagus officinalis]	34.144	32	5	28	5	179	19.8	9.01	46.73	5	0.41	0.468	1.12	0.872815	0.910432	0.960679	0.66	2.94	3.61	158.6	68.6	72.8	11.75	6.74	9.04
1150736661	NADH dehydrogenase [ubiquinone] flavoprotein 2, mitochondrial [Asparagus officinalis]	37.813	23	5	73	5	262	29	7.88	176.02	5	0.483	0.583	1.216	0.872815	0.930055	0.916613	8.39	38.77	7.15	146.1	67.7	86.2	3.34	20.76	32.08
1150728138	uncharacterized protein LOC109849464 [Asparagus officinalis]	26.351	10	5	26	3	688	75.1	8.7	37.35	5	1.887	1.309	0.787	0.880738	0.949627	0.916613	1.39	21.51	22.48	75.8	143	81.2	19.49	33.13	26.77
1150730519	SKP1-like protein 1B [Asparagus officinalis]	46.68	36	5	63	2	156	17.7	4.61	133.27	5	0.413	0.175	0.302	0.887105	0.563327	0.0181564	42.48	105.97	10.61	206.2	72	21.7	27.3	25.81	116.04
1150701873	synaptotagmin-5-like isoform X1 [Asparagus officinalis]	25.88	15	5	27	4	493	53.8	7.88	44.89	5	1.844	0.806	0.437	0.892541	0.999557	0.0899222	18.52	50.79	25.92	85.2	137.4	77.4	25.55	17.38	22.61
1150725061	uncharacterized protein LOC109848316 isoform X1 [Asparagus officinalis]	29.541	16	5	21	5	439	50.1	5.41	35.38	5	1.74	2.77	1.592	0.895003	0.584747	0.317068	32.55	40.08	9.66	50.1	90.9	158.9	47.91	19.43	13.67
1150684211	40S ribosomal protein S25-4-like [Asparagus officinalis]	42.857	38	5	82	3	109	12.1	10.48	211.44	5	1.499	1.301	0.759	0.895822	0.92641	0.715859	20.3	12.16	44.75	66.9	146.1	87	32.11	38.5	21.12
Q9SMK9	Phenylalanine ammonia-lyase 2 OS=Cicer arietinum OX=3827 GN=PAL2 PE=2 SV=1	44.666	9	5	64	1	718	78.3	6.33	148.29	5	0.285	2.672	9.374	0.901207	0.799519	4.76288e-08	32.16	140	141.79	75.8	21.6	202.6	21.94	48.01	108.23
1150713207	acetylornithine aminotransferase, mitochondrial-like [Asparagus officinalis]	26.694	14	5	41	4	459	50.1	6.79	82.82	5	1.69	1.651	0.955	0.901207	0.905257	0.980672	11.77	15.53	8.18	63.9	116.7	119.4	21.19	15.68	8.26
1150747510	26S proteasome non-ATPase regulatory subunit 4 homolog [Asparagus officinalis]	31.742	22	5	25	3	401	42.1	4.78	64.66	5	0.331	0.237	0.725	0.902178	0.875739	0.916613	3.35	1.53	1.8	189.3	63.7	47	19.67	1.69	4.53
P04711	Phosphoenolpyruvate carboxylase 1 OS=Zea mays OX=4577 GN=PEP1 PE=1 SV=2	13.696	5	5	47	2	970	109.2	6.1	52.67	5	1.519	0.745	0.743	0.904473	0.982884	0.916613	1.3	12.03	18.66	97.3	126	76.7	11.36	17.79	41.14
1150687428	glyoxysomal fatty acid beta-oxidation multifunctional protein MFP-a-like isoform X2 [Asparagus officinalis]	18.667	8	5	12	5	718	79.1	8.68	25.11	5	0.454	0.528	1.163	0.921519	0.950938	0.960679	10.53	45.36	26.67	151.2	69	79.9	5.03	10.88	41.63
1150713193	uncharacterized protein At3g49720-like [Asparagus officinalis]	19.376	26	5	13	5	258	28.4	9.41	18.51	5	1.586	2.133	1.557	0.923045	0.875739	0.642521	10.34	23.32	17.24	67.1	106.4	126.4	14.42	29.17	20.11
1150683968	transmembrane 9 superfamily member 1-like [Asparagus officinalis]	14.249	8	5	27	3	587	66.9	7.65	16.1	5	1.657	2.209	1.173	0.924734	0.839686	0.936465	1.35	8.15	15.03	66.3	108.8	125	10.97	20.55	19.3
1150716064	uncharacterized protein LOC109844061 isoform X1 [Asparagus officinalis]	13.579	16	5	16	5	389	41.6	4.59	38.95	5	1.732	2.271	1.652	0.931663	0.799123	0.182594	30.6	18.84	18.06	56	92	152	29.13	6.68	18.06
1150709352	proton pump-interactor 1-like [Asparagus officinalis]	46.633	20	5	55	5	378	42.9	9.41	92.63	5	1.387	1.529	1.12	0.931663	0.875739	0.957433	9.56	16.96	7.8	81.3	113.9	104.8	19.12	25.09	23.44
1150682826	actin-depolymerizing factor 7 [Asparagus officinalis]	33.872	50	5	20	1	139	15.9	5.43	46.71	5	0.346	0.399	0.884	0.931663	0.934163	0.986947	32.47	38.39	20.82	193.5	56.6	50	39.46	34.92	75.21
1150684238	copper transport protein ATX1-like [Asparagus officinalis]	36.566	60	5	47	5	82	8.6	7.96	67.91	5	0.47	0.679	1.194	0.931663	0.98003	0.916613	25.74	15.51	3.92	132.2	75.2	92.6	41.91	45.73	24.3
O64963	Phenylalanine ammonia-lyase 1 OS=Prunus avium OX=42229 GN=PAL1 PE=2 SV=1	44.787	9	5	43	2	717	78	6.62	94.93	5	0.377	0.769	2.04	0.931663	0.999557	0.394135	1.84	30.49	23.76	137.7	51.2	111.1	42.99	42.61	36.76
1150716896	probable methyltransferase PMT3 [Asparagus officinalis]	30.046	11	5	35	1	618	70.5	6.14	85.88	5	1.506	1.929	1.437	0.935004	0.901572	0.855441	4.46	23.05	24.11	71.4	110.7	117.9	15.76	29.11	21.88
1150683499	LETM1 and EF-hand domain-containing protein 1, mitochondrial-like [Asparagus officinalis]	24.806	8	5	16	3	743	84.2	6.23	39.57	5	0.352	0.317	0.757	0.935004	0.905257	0.918496	27.12	13.46	4.24	185.9	65.4	48.7	13.76	18.37	29.58
1150699214	elicitor-responsive protein 3-like [Asparagus officinalis]	34.13	38	5	57	5	144	16.1	4.35	139.81	5	1.363	4.074	2.988	0.936163	0.131233	0.000179798	57.29	37.5	32.24	37.1	65.9	197	22.14	58.67	28.92
1150676663	ubiquitin-conjugating enzyme E2 36 [Asparagus officinalis]	65.683	45	5	95	5	153	17.2	7.34	252.58	5	0.549	0.324	0.59	0.937836	0.634641	0.165346	0.24	9.45	9.23	172.6	78.2	49.2	13.96	18.36	27.46
1150670465	lipoxygenase 6, chloroplastic [Asparagus officinalis]	23.544	8	5	13	5	913	103.5	7.2	16.99	5	0.441	0.331	0.751	0.937836	0.87972	0.899685	34.25	46.11	9.63	154.9	81.6	63.5	20.4	21.62	74.42
1150708750	aldehyde dehydrogenase 22A1 [Asparagus officinalis]	27.149	12	5	32	5	596	65.9	7.44	87.4	5	1.667	1.783	1.07	0.937836	0.896804	0.98317	36.1	63.14	11.38	65.9	109.7	124.5	18.47	17.11	31.57
1150727800	adenine phosphoribosyltransferase 1-like [Asparagus officinalis]	77.77	30	5	65	5	223	24.9	8.44	175.46	5	0.54	0.505	0.889	0.937836	0.905257	0.916613	2.73	10.39	30.35	147.1	81	72	16.31	5.3	22.54
1150732987	eukaryotic translation initiation factor 3 subunit E [Asparagus officinalis]	51.958	17	5	64	5	438	51.3	5.83	170.07	5	0.481	0.38	1.125	0.939943	0.841571	0.950273	13.6	5.01	34.79	159.7	79.6	60.7	11.3	34.02	34.4
P04771	Glutamine synthetase PR-2 OS=Phaseolus vulgaris OX=3885 PE=2 SV=1	55.611	13	5	78	3	356	39.2	5.6	242.22	5	0.512	2.327	3.663	0.940913	0.591181	4.64679e-07	28.68	2.33	34.04	113.1	40.1	146.9	32.17	28.57	52.01
1150681544	peptidyl-prolyl cis-trans isomerase CYP20-1-like isoform X1 [Asparagus officinalis]	21.812	24	5	54	2	213	23	9.31	95.44	5	0.375	0.136	0.362	0.940913	0.675824	0.198915	1.97	21.08	23.37	205.1	69.7	25.2	11.43	29.37	64.68
Q9SXU1	Proteasome subunit alpha type-7 OS=Cicer arietinum OX=3827 GN=PAD1 PE=2 SV=1	49.6	27	5	36	1	249	27.1	7.37	122.1	5	0.479	0.251	0.488	0.940913	0.794318	0.299838	25.64	16.41	10.38	179	81.3	39.7	14.44	21.11	56.37
1150679000	tyrosine--tRNA ligase 1, cytoplasmic [Asparagus officinalis]	29.605	19	5	36	5	380	42.9	7.03	85.01	5	0.514	0.336	0.509	0.940913	0.826903	0.310661	9.51	11.81	14.77	165.4	86.1	48.5	7.99	8.89	24.69
1150676773	enhancer of mRNA-decapping protein 4-like isoform X1 [Asparagus officinalis]	32.03	6	5	56	4	1349	146	6.83	74.39	5	1.614	2.077	1.289	0.940913	0.852456	0.856775	0.14	2.12	0.36	64.9	102.7	132.4	14.13	11.1	10.35
1150725846	PITH domain-containing protein At3g04780 [Asparagus officinalis]	43.582	50	5	43	5	177	19.8	5.03	103.89	5	1.56	1.684	1.193	0.940913	0.893591	0.918093	9.2	7.57	20.91	64.7	107.3	128	25.95	45.62	22.3
1150746532	pre-mRNA-processing factor 19 [Asparagus officinalis]	22.822	13	5	32	5	521	56.8	6.84	57.21	5	1.372	1.386	1.01	0.940913	0.910432	0.999335	3.53	8.91	21.23	79.8	112.2	108	9.42	13.11	11.91
1150711033	DNA damage-inducible protein 1 [Asparagus officinalis]	28.731	21	5	32	5	402	44	5.74	63.12	5	0.503	0.458	0.91	0.940913	0.919199	0.974307	18.39	27.02	7.68	153.5	76.7	69.8	1.19	17.77	25.44
1150678014	HMG1/2-like protein [Asparagus officinalis]	37.89	20	5	92	2	150	16.7	6.93	204.89	5	1.375	1.068	0.829	0.940913	0.957023	0.876706	9.4	24.77	28.63	87.5	118.5	94	1.06	9.63	22.72
1150736192	uncharacterized protein LOC109820344 [Asparagus officinalis]	30.008	18	5	24	5	365	39.6	4.59	30.07	5	0.385	0.592	1.511	0.940913	0.982884	0.801183	15.87	25.87	2.8	159	55.5	85.5	11.97	27.52	33.8
1150720568	multiprotein-bridging factor 1b-like, partial [Asparagus officinalis]	47.631	48	5	66	4	136	15.1	10.04	183.32	5	1.303	1.187	0.983	0.944295	0.932264	0.988297	10.87	2.48	1.91	86.5	112.6	100.9	11.49	23.19	25.34
Q9SR73	40S ribosomal protein S28-1 OS=Arabidopsis thaliana OX=3702 GN=RPS28A PE=3 SV=1	28.674	34	5	70	5	64	7.4	10.83	164.22	5	1.302	1.023	0.765	0.948496	0.973844	0.705147	17.08	3.83	12.81	89.2	119.6	91.2	5.87	17.19	3.4
Q9LUD4	60S ribosomal protein L18a-3 OS=Arabidopsis thaliana OX=3702 GN=RPL18AC PE=2 SV=1	27.562	26	5	77	1	178	21.3	10.35	147.25	5	1.315	3.334	3.082	0.949282	0.516561	0.055996	24.05	51.65	68.76	66.9	87.9	145.3	37.17	48.3	84.93
1150735834	NADH dehydrogenase [ubiquinone] 1 beta subcomplex subunit 9 [Asparagus officinalis]	56.67	59	5	59	5	118	13.7	6.7	151.72	5	0.545	0.338	0.489	0.949282	0.794318	0.0698577	30.53	19.89	18.04	160	87.1	52.9	9.95	14.01	32.21
1150732581	vacuolar-sorting receptor 1-like [Asparagus officinalis]	29.285	9	5	31	5	624	69.4	5.43	58.22	5	1.469	2.277	1.6	0.949282	0.815527	0.348447	14.73	18.74	11.3	67.3	98.8	133.9	32.63	60.92	63.81
1150732883	probable proteasome inhibitor isoform X1 [Asparagus officinalis]	34.963	25	5	32	5	301	32.2	5.38	71.58	5	0.544	0.41	0.809	0.949282	0.893591	0.918093	8.58	18.11	43.28	151.3	86.7	62.1	10.37	28.32	8.39
1150726854	LOW QUALITY PROTEIN: NPL4-like protein 2 [Asparagus officinalis]	25.784	18	5	37	5	419	45.8	5.76	86.56	5	0.564	0.373	0.658	0.949282	0.901038	0.727176	15.8	43.79	0.7	151.5	92	56.5	35.28	7.54	4.31
P68158	Elongation factor Tu, chloroplastic OS=Nicotiana tabacum OX=4097 GN=TUFA PE=3 SV=1	41.348	18	5	49	1	478	51.9	6.81	127.45	5	1.302	1.514	1.103	0.949282	0.901572	0.972144	85.5	88.72	8.03	77.2	106	116.8	91.63	14.01	39.63
1150721441	polyadenylate-binding protein 3-like [Asparagus officinalis]	31.029	14	5	16	5	644	70.8	8.13	38.16	5	0.474	0.351	0.84	0.949282	0.905257	0.948067	6.71	21.97	37.77	159	75.3	65.7	13.27	4.36	31.36
1150688798	60S ribosomal protein L34-like [Asparagus officinalis]	27.561	33	5	81	5	120	13.8	11.68	197.19	5	1.322	1.367	1.051	0.949282	0.905257	0.995088	27.51	36.47	25.26	95.7	109.1	95.2	19.38	21.88	37.09
1150691311	glycylpeptide N-tetradecanoyltransferase 1 [Asparagus officinalis]	27.587	13	5	34	5	441	50.4	6.06	64.77	5	0.564	0.45	0.83	0.949282	0.929358	0.921527	5.89	15.68	9.08	149.1	84.1	66.9	16.19	22.84	31.46
1150733241	probable 6-phosphogluconolactonase 4, chloroplastic [Asparagus officinalis]	23.369	16	5	39	3	324	34.9	8.1	58.6	5	1.26	1.268	1.006	0.949282	0.930055	0.998638	16.73	7.73	8.09	84	109.6	106.4	17.12	3.68	11.47
1150733851	vesicle-associated protein 1-3-like [Asparagus officinalis]	26.124	23	5	43	4	219	24.3	8.29	50.96	5	1.171	1.174	0.913	0.949282	0.9315	0.926094	14.48	16.72	5.99	87.6	112.7	99.7	28.76	23.93	12.99
1150686431	cytochrome b-c1 complex subunit Rieske-4, mitochondrial-like [Asparagus officinalis]	21.48	26	5	23	2	276	30.2	8.87	46.26	5	1.247	1.182	0.849	0.949282	0.954542	0.946676	17.24	13.45	9.66	88	108.1	104	13.32	11.95	25.69
1150736680	coatomer subunit epsilon-1-like [Asparagus officinalis]	32.018	22	5	24	5	287	31.9	5.58	68.08	5	1.168	1.07	0.872	0.949282	0.962593	0.916613	7.45	14.18	1.97	93.9	110.1	96	13.68	13.99	3.52
1150689495	histone H3.3 [Asparagus officinalis]	22.743	35	5	66	2	136	15.4	11.15	146.2	5	0.596	0.738	0.802	0.949282	0.98003	0.809784	2.45	13.34	1.58	118.3	100.8	80.9	25.03	20.43	46.83
1150684829	translocon-associated protein subunit beta-like [Asparagus officinalis]	55.511	26	5	72	5	235	25.5	9.7	170.87	5	0.559	0.725	1.162	0.949282	0.983932	0.916613	1.03	36.49	15.83	130.8	76.6	92.6	4.03	23.34	24
Q9FM01	UDP-glucose 6-dehydrogenase 4 OS=Arabidopsis thaliana OX=3702 GN=UGD4 PE=1 SV=1	24.992	15	5	60	2	480	53.1	5.85	96.52	5	0.476	0.747	1.145	0.949282	0.999557	0.972144	40.25	12.21	5.02	126	81.9	92.1	22.62	34.18	1.98
1150709066	far upstream element-binding protein 1-like [Asparagus officinalis]	39.493	15	5	19	5	407	43.9	7.4	34.18	5	0.609	0.526	0.776	0.950306	0.934163	0.916613	22.58	18.6	12.63	155.8	82.4	61.8	16.33	30.15	29
1150715952	serine carboxypeptidase II-2 [Asparagus officinalis]	32.012	17	5	40	5	474	52.7	5.76	116.31	5	1.341	1.272	0.89	0.95218	0.942726	0.948133	9.79	34.62	0.01	99.2	106.2	94.6	24.06	23.33	40.73
1150670833	hypersensitive-induced response protein 1-like [Asparagus officinalis]	36.631	19	5	39	1	286	31.5	5.59	102.56	5	1.282	1.499	1.051	0.952529	0.915853	0.990161	6.26	9.1	2.31	78.9	101.1	120.1	8.03	16.06	11.54
1150714840	probable steroid-binding protein 3 [Asparagus officinalis]	29.701	19	5	69	4	177	19.5	4.51	66.91	5	1.339	1.852	1.232	0.95458	0.891446	0.892909	9.95	7.73	11.65	68.6	107.7	123.7	14.55	10.59	4.9
1150716240	protein EXPORTIN 1A [Asparagus officinalis]	42.36	6	5	32	5	1075	123.4	5.69	59.02	5	0.623	0.459	0.74	0.955272	0.910432	0.847967	15.49	8.62	0.66	146.3	88.5	65.2	3.69	21.73	12.05
1150747069	probable ADP-ribosylation factor GTPase-activating protein AGD8 [Asparagus officinalis]	31.364	21	5	45	3	401	43.1	9.03	86.4	5	0.562	0.573	1.068	0.955272	0.973311	0.995088	28.11	12.27	6.75	140.6	78.9	80.5	11.65	39.46	26.9
1150734872	vesicle-associated membrane protein 711-like [Asparagus officinalis]	17.991	35	5	16	5	220	25.2	9.31	31.93	5	1.121	0.875	0.892	0.955272	0.999557	0.932464	8.78	34.19	10.11	98.8	110.2	90.9	5.66	4.61	21.94
1150725567	serine/threonine-protein phosphatase PP2A catalytic subunit [Asparagus officinalis]	34.092	19	5	36	5	314	35.8	5.33	89.86	5	0.627	0.604	0.988	0.956189	0.962593	0.995825	23.71	3.8	17.08	134.7	83.2	82.2	4.54	20.82	2.25
1150675970	oryzain alpha chain-like [Asparagus officinalis]	45.973	15	5	95	5	473	52.4	5.43	289.51	5	1.173	0.983	0.85	0.958155	0.98003	0.916613	2.11	5.5	3.77	95.5	110.5	93.9	10.78	12.33	7.05
1150700017	2-oxoglutarate-dependent dioxygenase AOP2-like [Asparagus officinalis]	36.121	16	5	33	5	328	37.1	5.64	116.7	5	1.091	17.084	20.382	0.959365	0.00531452	2.75261e-15	34.86	14.47	11.7	17.3	16.3	266.4	10.1	33.12	45.74
1150739011	protein FATTY ACID EXPORT 3, chloroplastic [Asparagus officinalis]	44.663	21	5	39	5	351	38.6	7.84	112.47	5	0.628	0.569	0.88	0.959365	0.949627	0.918093	7.17	11.63	6.84	126.6	94	79.4	11.77	12.04	6.94
1150704027	uric acid degradation bifunctional protein TTL-like [Asparagus officinalis]	38.442	25	5	29	5	242	26.6	9.67	70.11	5	0.674	0.603	0.946	0.959365	0.950938	0.972144	21.32	14.54	8.59	124.4	83.8	91.9	26.35	11.19	12.19
1150690279	tryptophan synthase alpha chain-like isoform X1 [Asparagus officinalis]	45.968	24	5	56	5	332	35.4	7.49	143.09	5	1.258	0.609	0.481	0.959365	0.966238	0.0886337	17.68	14.99	0.89	104.7	131.6	63.7	13.58	10.95	13.5
1150722098	acetyl-coenzyme A carboxylase carboxyl transferase subunit alpha, chloroplastic-like [Asparagus officinalis]	25.093	11	5	29	5	727	80.8	8.51	50.46	5	0.642	0.635	0.989	0.959365	0.978921	0.999544	14.21	20.1	1.8	125.1	87.9	87	5.29	11.73	52.71
1150703968	inosine-5'-monophosphate dehydrogenase-like, partial [Asparagus officinalis]	35.711	22	5	30	5	389	41	6.65	78.19	5	1.136	0.844	0.589	0.959365	0.999557	0.163935	19.59	12.93	6.67	100.1	113.7	86.2	20.08	35.65	40.62
1150725138	LOW QUALITY PROTEIN: dolichyl-diphosphooligosaccharide--protein glycosyltransferase subunit STT3B [Asparagus officinalis]	38.119	8	5	103	4	723	80.5	8.91	231.65	5	1.046	1.097	1.122	0.95983	0.962593	0.944496	10.81	1.31	20.55	93.2	97.5	109.3	5.76	2.65	27.23
1150680912	protein CROWDED NUCLEI 1-like isoform X1 [Asparagus officinalis]	20.116	5	5	13	5	1133	130.3	5.49	23.84	5	1.167	1.653	1.417	0.963282	0.901572	0.696826	3.21	17.04	13.74	78.5	91.7	129.9	1.96	4.14	13.4
1150736034	putative D-cysteine desulfhydrase 1, mitochondrial [Asparagus officinalis]	44.636	18	5	34	4	420	45.7	8.19	103.45	5	1.088	1.614	1.483	0.964132	0.875739	0.485875	6.64	13	2.58	79.8	80.6	139.6	15.07	14.59	12.25
1150677965	monosaccharide-sensing protein 2-like isoform X1 [Asparagus officinalis]	51.707	11	5	56	5	819	88.2	5.24	150.43	5	0.655	0.486	0.734	0.96425	0.910432	0.605771	22.76	1.77	0.89	140.5	92	67.5	15.52	29.71	22.03
1150740020	stress-response A/B barrel domain-containing protein HS1-like [Asparagus officinalis]	55.513	41	5	116	5	109	12.2	5.97	343.93	5	0.729	0.843	1.052	0.96445	0.999716	0.995088	8.13	5.2	13.34	115.7	88.7	95.6	8.15	8.8	10.1
1150690628	LOW QUALITY PROTEIN: xylulose kinase [Asparagus officinalis]	16.143	8	5	36	5	564	62.1	6.62	56.35	5	1.025	0.985	0.961	0.964858	0.978307	0.987255	12.44	8.59	0.83	99.7	102.2	98.1	14.23	4.68	7.75
1150739541	uncharacterized protein LOC109822150 [Asparagus officinalis]	31.837	29	5	35	5	224	24	9.58	95.93	5	0.994	1.021	1.027	0.966717	0.96313	0.995088	6.27	12.7	6.96	94.6	94.1	111.4	30.12	21.57	14.66
P34789	40S ribosomal protein S28-2 OS=Arabidopsis thaliana OX=3702 GN=RPS28C PE=3 SV=1	26.878	34	5	43	5	64	7.3	11.17	97.94	5	1.013	0.723	0.713	0.966717	0.983932	0.52726	20.4	1.09	34.27	102.9	115.1	82.1	8.42	14.66	16.38
1150739620	60S ribosomal protein L22-2-like [Asparagus officinalis]	24.136	39	5	32	4	122	13.8	9.55	57.61	5	0.995	0.977	1.011	0.967259	0.975448	0.999353	0.48	12.87	4.69	107.6	95.7	96.7	11.52	12.63	20.34
1150687756	LOW QUALITY PROTEIN: phytochrome A-like [Asparagus officinalis]	23.206	8	5	15	5	926	102.9	6.48	31.99	5	1.092	0.922	0.985	0.967259	0.982884	0.998638	13.05	22.36	1.43	94.4	103.1	102.5	18.22	6.43	26.74
1150714339	40S ribosomal protein S7-like [Asparagus officinalis]	29.514	29	5	47	3	192	22.2	9.77	151.35	5	1.121	0.744	0.709	0.967259	0.98377	0.67276	11.7	0.63	10.86	111.3	106	82.8	9.49	21.31	15.99
Q06364	Probable 26S proteasome non-ATPase regulatory subunit 3 OS=Daucus carota OX=4039 GN=21D7 PE=1 SV=2	26.138	11	5	34	1	489	55.5	8.82	71.27	5	0.66	0.664	1.728	0.967259	0.983932	0.59011	25.71	5.66	29.06	131.8	83.8	84.4	24.5	39.23	70.14
1150672670	cyclic phosphodiesterase-like [Asparagus officinalis]	56.381	47	5	58	5	178	19.8	5.43	136.85	5	1.011	0.918	1.157	0.967259	0.983932	0.916613	2.37	32.95	4.99	102.8	103.9	93.3	8.16	19.71	19.2
1150725957	peroxisomal fatty acid beta-oxidation multifunctional protein MFP2-like isoform X1 [Asparagus officinalis]	12.639	8	5	25	5	750	82	8.82	40.72	5	0.995	0.955	1.068	0.971574	0.98003	0.974307	7.67	9.55	21.89	99.8	104.8	95.4	7.25	16.67	36.54
1150713402	probable prolyl 4-hydroxylase 4 [Asparagus officinalis]	18.117	18	5	21	5	295	32.5	6.61	44.25	5	1.132	1.186	1.047	0.973541	0.962593	0.989647	7.16	5.84	0.69	90.4	102.3	107.2	15.37	8.5	9.02
1150708457	glucan endo-1,3-beta-glucosidase 13-like isoform X1 [Asparagus officinalis]	26.947	11	5	32	5	497	54.1	5.44	51.51	5	0.727	0.714	1.024	0.975174	0.983932	0.995088	6	34.04	11.85	128.4	79.9	91.7	11.78	12.08	18.64
1150709605	uncharacterized protein At1g32220, chloroplastic-like isoform X3 [Asparagus officinalis]	25.942	28	5	42	5	287	30.8	9.77	75.83	5	0.979	0.89	0.909	0.975174	0.986255	0.952824	6.47	4.58	11.78	105	101.7	93.4	8.23	4.34	11.65
1150732076	DExH-box ATP-dependent RNA helicase DExH12-like [Asparagus officinalis]	25.026	3	5	31	5	2179	247.4	6.07	38.48	5	1.06	0.857	0.809	0.975174	0.990572	0.916613	0	16.43	16.43	102.8	109	88.2	6.4	13	8.17
1150692797	crocetin glucosyltransferase, chloroplastic-like [Asparagus officinalis]	35.33	37	5	37	5	161	17.2	5.33	71.57	5	1.021	2.549	2.648	0.985078	0.510299	0.000772056	10.62	28.93	2.32	62.1	64.5	173.4	14.53	20	32.21
1150705445	ubiquitin carboxyl-terminal hydrolase 3-like [Asparagus officinalis]	55.092	12	5	76	5	235	26.1	4.67	294.33	5	0.719	0.259	0.436	0.986803	0.565386	0.00468908	7.76	31.2	31.34	157.8	104.6	37.6	5.59	22.6	44.39
1150676317	profilin [Asparagus officinalis]	37.277	34	5	91	4	131	14.3	4.78	257.45	5	0.933	1.192	1.034	0.986803	0.927311	0.997328	11.22	5.99	34.89	87.3	104.6	108.1	21.91	21.29	48.64
P68209	Succinate--CoA ligase [ADP-forming] subunit alpha-1, mitochondrial OS=Arabidopsis thaliana OX=3702 GN=At5g08300 PE=1 SV=1	26.917	13	5	20	1	347	36.1	8.27	35.62	5	0.938	0.895	1.059	0.989362	0.98377	0.990161	22.76	35.11	25.13	99.7	93.5	106.8	13.36	8.64	22.71
1150697993	LOW QUALITY PROTEIN: cyanate hydratase [Asparagus officinalis]	34.864	29	5	37	5	168	18.6	5.47	84.59	5	0.747	0.364	0.473	0.99077	0.794318	0.0112419	1.78	32.89	25.62	140.6	108.2	51.2	21.92	22.43	52.62
1150701497	beta-galactosidase 5-like [Asparagus officinalis]	28.7	10	5	19	5	789	87.7	6.84	45.74	5	0.775	1.476	1.904	0.99077	0.919199	0.139381	9.7	29.15	21.35	91	66.2	142.8	33.57	9.66	22.58
O49118	Histone H2B OS=Capsicum annuum OX=4072 GN=HIS2B PE=2 SV=3	33.632	31	5	144	1	145	16	10.11	290.87	5	0.851	2.774	6.005	0.991268	0.619358	0.00108756	19.78	74.42	113.55	62.1	52.5	185.4	11.22	75.97	63.5
1150684665	gamma carbonic anhydrase-like 2, mitochondrial [Asparagus officinalis]	41.715	35	5	60	4	186	20.6	8.19	134.27	5	0.779	0.526	0.762	0.991268	0.919199	0.684283	9.79	14.34	30.85	133.8	101.9	64.3	6.39	12.58	48.19
1150695103	flowering locus K homology domain-like [Asparagus officinalis]	25.259	11	5	44	5	489	51.8	5.14	79.63	5	0.805	0.765	0.951	0.991268	0.986	0.98702	13.01	30.13	15.74	118.4	97	84.7	8.57	13.55	25.76
Q9LEV3	CBS domain-containing protein CBSX3, mitochondrial OS=Arabidopsis thaliana OX=3702 GN=CBSX3 PE=1 SV=1	36.425	17	5	81	1	206	22.7	9.01	219.1	5	0.895	0.637	0.603	0.991268	0.999557	0.769599	52.15	8.45	45.44	115.8	105.9	78.3	32.24	40.29	25.71
1150706446	proline iminopeptidase [Asparagus officinalis]	21.528	26	5	23	5	333	37.8	5.95	46.95	5	0.774	0.886	1.31	0.991268	0.999557	0.847592	38.97	17.61	7.38	113.5	85.9	100.6	3.97	26.08	11.6
1150700827	ankyrin repeat domain-containing protein 2A-like [Asparagus officinalis]	83.165	19	5	137	3	338	36.4	4.65	475.9	5	0.724	0.433	0.559	0.991757	0.893591	0.112229	10.07	0.36	9.74	140.5	102.3	57.2	12.57	13.65	33.35
1150747884	trans-resveratrol di-O-methyltransferase-like [Asparagus officinalis]	20.375	17	5	45	4	357	40.1	5.44	92.94	5	0.928	1.2	0.917	0.991757	0.931854	0.952824	10.64	8.93	9.49	97.7	85.3	116.9	44.8	68.94	58.55
1150701412	PTI1-like tyrosine-protein kinase 3 [Asparagus officinalis]	17.692	18	5	11	4	370	40.9	8.19	8.56	5	0.737	0.958	1.3	0.991757	0.98003	0.916613	1.04	1.34	6.46	110.6	84.4	105	12.25	11.22	16.87
1150724858	LOW QUALITY PROTEIN: lon protease homolog, mitochondrial-like [Asparagus officinalis]	27.742	6	5	33	3	1009	111.5	5.55	49.97	5	0.861	0.919	1.271	0.991757	0.982884	0.918093	7.3	6.27	3.15	109.8	89.3	100.9	6.77	10.82	17.45
1150739935	alliin lyase-like [Asparagus officinalis]	16.191	15	5	20	5	402	45.4	7.01	32.65	5	1.021	0.906	0.761	0.991757	0.986255	0.896995	3.28	22.03	35.79	102.6	104.5	93	8.91	15.08	32.96
1150674278	hexokinase-2-like, partial [Asparagus officinalis]	33.286	21	5	31	4	409	44.8	6.02	93.15	5	0.831	0.782	0.999	0.993431	0.999557	0.995088	22.49	12.62	9.09	106.7	96.7	96.6	16.93	12.37	24.96
1150715893	LOW QUALITY PROTEIN: phospholipase D alpha 1-like [Asparagus officinalis]	27.34	11	5	34	5	776	87.6	6.44	60.31	5	0.805	1.775	2.078	0.993913	0.893591	0.098482	8.58	3.25	12.56	97.1	71.3	131.6	20.39	17.36	18.54
1150673717	LOW QUALITY PROTEIN: brefeldin A-inhibited guanine nucleotide-exchange protein 2-like [Asparagus officinalis]	21.169	4	5	26	5	1927	215	5.52	40.04	5	0.96	1.38	1.27	0.993913	0.92641	0.916613	7.93	0.86	15.82	87.9	90	122.1	9.04	15.32	14.81
1150734003	CAP-Gly domain-containing linker protein 1 [Asparagus officinalis]	33.627	38	5	65	5	176	19.4	4.63	165.35	5	0.936	1.368	1.36	0.993913	0.935141	0.701013	1.96	6.5	2.95	93.5	87.5	119	14.79	9.61	17.7
Q43467	Elongation factor Tu, chloroplastic OS=Glycine max OX=3847 GN=TUFA PE=3 SV=1	43.454	18	5	40	1	479	52.1	6.68	111.65	5	0.813	0.411	0.716	0.993913	0.957023	0.916613	22.14	13.96	72.07	133.6	108.7	57.7	10.54	45.08	29.46
1150741740	5-oxoprolinase [Asparagus officinalis]	25.891	6	5	19	5	1259	137.8	5.99	35.47	5	0.937	1.08	1.153	0.993913	0.96419	0.946676	4.93	2.61	11.38	100.3	96.3	103.4	8.38	24.43	7.1
1150697646	phosphoglycerate mutase-like protein 1 isoform X1 [Asparagus officinalis]	46.111	17	5	66	5	366	40.5	7.14	212.18	5	0.803	1.14	1.419	0.993913	0.966238	0.59155	7.14	25.2	11.59	110.6	80.7	108.7	8.61	10.4	19.49
1150676491	chaperone protein dnaJ 10-like [Asparagus officinalis]	73.513	17	5	111	5	341	38.3	8.02	303.49	5	0.916	1.322	1.48	0.994359	0.905257	0.519773	0.26	11.75	7.83	97.4	89.4	113.2	14.48	15.73	20.13
1150683765	cleft lip and palate transmembrane protein 1 homolog isoform X1 [Asparagus officinalis]	23.495	11	5	29	5	589	67.6	6.16	46.32	5	0.931	0.858	0.955	0.994359	0.999557	0.990161	5.5	6.31	9.95	108.8	97.8	93.4	7.3	20.89	27.98
1150732396	carotenoid 9,10(9',10')-cleavage dioxygenase [Asparagus officinalis]	28.248	16	5	19	5	547	61.6	6.24	27.36	5	0.923	1.129	1.223	0.994974	0.961383	0.916613	9.81	15.84	29.37	105.5	92	102.5	9.1	11.02	21.87
1150704732	nucleoside diphosphate kinase 1-like [Asparagus officinalis]	51.964	27	5	72	4	148	16.5	8.88	212.99	5	0.874	0.512	0.585	0.996716	0.903381	0.157885	1.28	29.01	16.58	125.7	109.9	64.3	4.68	10.76	27.86
1150710465	NADPH--cytochrome P450 reductase-like [Asparagus officinalis]	34.797	11	5	65	5	703	77.7	5.36	146.32	5	0.858	1.371	1.599	0.996716	0.934163	0.485183	0.14	2.89	11.56	93	82	125	12.51	16.84	15.51
1150676331	DEAD-box ATP-dependent RNA helicase 56-like [Asparagus officinalis]	28.6	21	5	17	3	423	47.4	6.01	36.39	5	0.702	0.432	0.868	0.996716	0.950938	0.970691	15.15	45.17	19.39	131.6	92.4	76.1	21.11	3.17	39.15
Q35322	NADH dehydrogenase [ubiquinone] iron-sulfur protein 3 OS=Oryza sativa subsp. japonica OX=39947 GN=NAD9 PE=2 SV=2	26.054	34	5	47	5	190	23	7.5	110.6	5	0.909	0.805	0.828	0.996716	0.994357	0.875012	15.83	6.57	9.68	110.6	100.5	89	7.35	6.41	11.1
1150682715	uncharacterized protein LOC109829869 [Asparagus officinalis]	26.414	7	5	32	5	729	82.7	8.38	57.96	5	0.919	0.879	0.956	0.996716	0.999557	0.990161	3.12	15.13	12.27	111	98.3	90.7	10.94	12.96	24.22
1150682600	delta-1-pyrroline-5-carboxylate synthase-like isoform X1 [Asparagus officinalis]	16.506	7	5	16	2	716	77	6.42	32.13	5	0.751	1.277	1.662	0.997414	0.931107	0.664897	6.99	11.71	10.53	99.7	74.9	125.4	11.74	19.41	30.5
1150723218	flowering locus K homology domain-like [Asparagus officinalis]	22.864	11	5	27	5	546	58.9	5.05	55.06	5	0.892	0.689	0.734	0.997415	0.98003	0.757551	7.43	0.55	21.17	120.6	107.6	71.8	8.52	33.47	10.22
1150726469	transcription factor Pur-alpha 1-like [Asparagus officinalis]	20.697	25	5	9	4	279	31.2	5.72	16.46	5	0.904	0.966	1.121	0.997415	0.983953	0.95889	2.78	2.81	9.66	105	93.5	101.5	2.03	2.46	9.53
1150673209	dehydrin Rab15-like [Asparagus officinalis]	73.073	40	6	135	5	102	11.1	10.46	418.47	6	6.224	4.639	1.048	0.0152314	0.136506	0.995088	42.53	21.01	42.11	34.2	129.8	136	27.63	48.07	74.43
1150748446	60S acidic ribosomal protein P2A-like [Asparagus officinalis]	80.349	80	6	116	4	113	11.5	4.37	376.54	6	0.137	0.036	0.456	0.0185198	1.41017e-05	0.129656	18.38	43.45	100.6	257.1	35.6	7.3	14.36	42.42	120.52
1150711141	subtilisin-like protease SBT1.7 [Asparagus officinalis]	50.271	10	6	70	1	845	91.3	6.74	202.82	6	14.385	29.039	1.991	0.0224967	0.0125107	0.233642	30.72	9.37	2.09	6.8	97.1	196.1	12.16	41.8	36.69
1150691090	probable histone H2A.3 [Asparagus officinalis]	50.2	60	6	71	2	134	13.9	10.15	142.29	6	0.096	0.053	0.724	0.0274789	0.0233149	0.863256	46.2	10.99	26.83	262.1	23.9	13.9	3.26	72.81	27.68
Q96299	14-3-3-like protein GF14 mu OS=Arabidopsis thaliana OX=3702 GN=GRF9 PE=1 SV=2	25.625	20	6	95	1	263	29.5	4.91	124.17	6	12.531	28.836	1.442	0.0353545	0.0149802	0.771873	17.76	16.15	134.18	7.2	90.2	202.6	32.7	66.61	87.94
1150691782	LOW QUALITY PROTEIN: peroxidase N-like [Asparagus officinalis]	57.451	23	6	82	5	338	36	7.5	251.94	6	0.168	0.015	0.08	0.0472106	7.4816e-09	2.75261e-15	31.07	43.16	13.67	246.9	48.8	4.3	15.06	36.45	39.47
1150691771	glutamate decarboxylase [Asparagus officinalis]	36.573	14	6	41	3	496	56.2	6.34	86.18	6	0.112	0.131	1.514	0.0658122	0.3726	0.801183	43.32	22.92	28.93	238.2	30.5	31.3	18.56	21.12	48.9
P37900	Heat shock 70 kDa protein, mitochondrial OS=Pisum sativum OX=3888 GN=HSP1 PE=2 SV=1	55.866	12	6	86	1	675	72.3	6.02	204.84	6	9.473	7.44	1.062	0.072408	0.280949	0.995088	99.17	51.65	76.8	9.2	87.1	203.7	70.97	54.44	61.95
1150681239	proteasome subunit alpha type-4-like [Asparagus officinalis]	54.919	37	6	62	4	250	27.2	5.77	197.71	6	0.171	0.116	0.685	0.113931	0.114399	0.809784	36.79	22.91	24.65	236	40.3	23.7	15.42	40.97	31.69
1150709625	enolase 1, chloroplastic [Asparagus officinalis]	24.388	17	6	92	4	339	36.4	5.35	187.75	6	3.552	2.363	0.662	0.135215	0.613509	0.366799	0.79	47.23	53.76	42.2	149.9	107.9	12.4	21	25.14
1150742137	uncharacterized protein LOC109823308 [Asparagus officinalis]	37.222	11	6	20	6	763	86.1	7.3	37.69	6	0.155	0.151	0.971	0.16339	0.381154	0.997569	25.98	26.37	0.33	227.8	39.7	32.5	18.46	15.67	14.29
1150690156	proteasome subunit beta type-2-A-like [Asparagus officinalis]	30.628	26	6	30	6	200	22.2	6.42	63.15	6	0.207	0.099	0.471	0.185715	0.0183104	0.158236	11.12	13.92	47.13	231.8	44.7	23.5	18.41	32.87	23.32
Q9S9Z8	14-3-3-like protein GF14 omicron OS=Arabidopsis thaliana OX=3702 GN=GRF11 PE=2 SV=2	24.561	21	6	93	1	252	28.8	5.01	123.21	6	5.298	2.844	0.734	0.19018	0.80828	0.866403	56.8	89.12	23.22	34.5	169.2	96.3	75.97	16.61	57.38
1150713710	subtilisin-like protease SBT1.7 [Asparagus officinalis]	47.848	11	6	65	3	753	82.2	6.73	174.12	6	4.67	6.524	1.329	0.214936	0.379253	0.894186	20.2	28.24	22.07	24.1	105.4	170.5	11.75	31.13	33.71
1150711852	nucleoside diphosphate kinase III, chloroplastic/mitochondrial [Asparagus officinalis]	59.66	16	6	98	2	454	50.5	5.66	268.86	6	0.126	0.086	0.677	0.222311	0.334409	0.916613	1.83	13.95	11.95	244.8	31.1	24.1	19.51	29.58	11.86
1150733132	translationally-controlled tumor protein homolog isoform X1 [Asparagus officinalis]	43.273	60	6	36	4	168	19	4.68	86.34	6	0.198	0.256	1.293	0.287499	0.716204	0.916613	37.21	58.39	25.31	224.2	35.5	40.3	28.26	54.32	81.98
1150701713	CO(2)-response secreted protease-like [Asparagus officinalis]	43.303	12	6	27	6	771	81.2	7.49	68.01	6	0.211	0.173	0.829	0.33394	0.409364	0.957433	2.5	30.98	1.82	222	42.9	35.1	9.35	18.68	29.33
1150678069	60S ribosomal protein L31-like [Asparagus officinalis]	28.144	48	6	49	2	121	13.9	9.99	115.8	6	2.583	3.122	1.209	0.375927	0.316877	0.916613	9.38	62.91	51.33	48.4	121.9	129.7	28.29	23.27	24.83
1150731679	2'-deoxymugineic-acid 2'-dioxygenase-like [Asparagus officinalis]	47.677	26	6	45	5	330	37	5.6	89.91	6	0.296	0.25	0.736	0.49741	0.455998	0.785869	6.24	24.06	0.09	197.9	56.1	45.9	19.03	26.99	16.49
1150709973	proteasome subunit beta type-6 [Asparagus officinalis]	53.968	40	6	56	6	228	24.5	5.87	144.52	6	0.321	0.212	0.66	0.497629	0.289752	0.402035	6.51	29.85	22.35	196.4	60.6	43.1	17.11	4.37	15.42
1150668625	D-amino-acid transaminase, chloroplastic-like isoform X1 [Asparagus officinalis]	73.384	38	6	88	6	330	35.9	5.72	275.12	6	0.305	0.197	0.607	0.513852	0.272779	0.36626	8.84	3.09	3.81	205.3	57.9	36.9	12.85	9.42	8.33
1150708834	zinc finger CCCH domain-containing protein 8 [Asparagus officinalis]	30.127	22	6	30	6	501	53.5	7.9	52.68	6	0.27	0.2	0.847	0.518953	0.511776	0.960679	13.48	6.11	21.87	209.6	48.6	41.8	16.28	10.32	23.91
1150733101	18.1 kDa class I heat shock protein-like [Asparagus officinalis]	41.337	32	6	83	4	185	21	8.6	189.71	6	0.34	0.154	0.454	0.535734	0.104844	0.0140877	19.16	36	6.48	200.7	68.3	31	11.19	5.48	25.62
1150681813	22.0 kDa class IV heat shock protein-like [Asparagus officinalis]	62.754	43	6	78	6	193	21.6	7.55	210.55	6	0.342	0.141	0.519	0.542153	0.058009	0.0408141	25.51	17.12	16.72	200.2	68.4	31.4	6.26	15.64	23.03
1150744766	acetyl-coenzyme A synthetase, chloroplastic/glyoxysomal [Asparagus officinalis]	23.828	12	6	55	6	631	70.3	6	84.15	6	2.331	2.467	1.126	0.542153	0.510299	0.955876	8.95	20.75	10.54	53	116.2	130.8	6.57	10.72	11.24
1150748176	alpha-soluble NSF attachment protein-like [Asparagus officinalis]	36.612	22	6	62	2	289	32.5	5.05	133.36	6	0.218	0.151	1.253	0.638859	0.606938	0.933925	11.84	46.96	66.41	227.5	42.9	29.7	16.74	51.46	97.84
1150724715	actin-depolymerizing factor 7-like isoform X1 [Asparagus officinalis]	38.535	65	6	31	2	139	16	5.71	70.43	6	2.097	2.675	1.072	0.685079	0.642963	0.97878	29.58	1.28	20.1	72.1	110	117.9	29.08	25.56	41.64
1150733290	actin-depolymerizing factor 7-like [Asparagus officinalis]	72.806	65	6	65	4	139	15.9	5.44	205.37	6	0.36	0.186	0.527	0.691531	0.22758	0.2833	3.02	29.24	5.98	206.9	61	32.1	28.65	31.83	91.98
1150673861	hydroxyphenylpyruvate reductase-like [Asparagus officinalis]	40.403	30	6	73	4	182	19.5	6.54	165.98	6	0.387	0.456	1.1	0.698089	0.889116	0.957611	10.52	36.78	10.31	160.5	64.1	75.4	3.15	20.89	30.55
1150715216	delta-1-pyrroline-5-carboxylate synthase-like isoform X2 [Asparagus officinalis]	34.436	12	6	47	2	728	78.7	6.68	73.57	6	2.477	2.986	1.086	0.712759	0.761113	0.980672	35.18	16.95	16.36	65.3	117.9	116.9	37.8	34.72	73.59
1150695399	aspartyl protease 25-like [Asparagus officinalis]	26.216	29	6	92	6	278	29.4	8.72	156.54	6	1.959	3.629	1.852	0.728289	0.197067	0.121767	29.37	1.65	1.41	57.3	84.6	158.1	26.06	37.22	26.67
1150746122	LOW QUALITY PROTEIN: membrane steroid-binding protein 1-like [Asparagus officinalis]	53.664	33	6	102	3	221	24.1	5.33	257.59	6	2.243	3.171	1.413	0.736996	0.503355	0.585677	17.69	15.22	2.81	48.8	102.9	148.3	12.22	19.5	14.69
1150677430	protein ILITYHIA [Asparagus officinalis]	21.587	3	6	26	6	2616	286	7.05	55.78	6	2.3	3.002	1.293	0.748094	0.678771	0.79268	1.88	1.88	0.53	46.8	110.4	142.8	14.47	14.11	15.19
1150743218	60S ribosomal protein L17-like [Asparagus officinalis]	28.28	29	6	34	1	183	20.8	10.43	63.12	6	2.252	2.591	1.081	0.748311	0.80828	0.984408	7.38	2.97	17.83	52.4	112	135.6	22.23	19.8	11.88
1150691745	probable nucleoredoxin 2 isoform X1 [Asparagus officinalis]	17.417	14	6	27	6	442	49.7	5.94	10.1	6	1.978	5.363	1.948	0.786762	0.073443	0.0584364	55.01	27.95	16.39	44.8	82.4	172.8	28.47	20.65	40.83
1150743002	elongation factor Tu, chloroplastic-like [Asparagus officinalis]	57.551	18	6	73	2	441	47.7	5.63	197.29	6	1.995	1.916	0.944	0.813438	0.873414	0.972144	2.62	8.9	6.09	62.3	118.2	119.4	8.14	4.49	7.21
1150711113	eukaryotic peptide chain release factor subunit 1-3 [Asparagus officinalis]	30.122	17	6	34	3	436	48.9	5.72	75.47	6	0.271	0.244	0.779	0.825417	0.875174	0.948133	12.25	21.17	31.31	199.4	54.4	46.2	3.19	8.61	23.65
1150716566	uncharacterized protein LOC109844308 [Asparagus officinalis]	30.575	25	6	39	1	241	27.5	8.47	70.51	6	0.227	0.359	1.576	0.825896	0.934163	0.785977	11.21	96.95	62.81	182	56.3	61.7	37.48	27.14	70.78
1150692311	uncharacterized protein LOC109833732 [Asparagus officinalis]	35.884	41	6	60	6	93	11.2	7.18	112.71	6	1.702	1.478	0.905	0.827153	0.903581	0.946676	5.36	6.29	11.88	78.6	113.8	107.6	14.57	13.92	11.95
1150748725	DNA damage-binding protein 1a [Asparagus officinalis]	22.327	9	6	16	6	1089	121.5	5.36	16.98	6	0.393	0.578	1.237	0.840768	0.950938	0.916613	57.83	40.71	17.79	161.9	61.7	76.4	66.25	1.68	16.88
1150708365	dolichyl-diphosphooligosaccharide--protein glycosyltransferase subunit STT3A [Asparagus officinalis]	21.463	10	6	36	6	791	88.2	9.16	48.71	6	2.012	1.826	0.924	0.846092	0.893591	0.972144	10.35	41.76	7.8	63.5	126.6	109.9	18.41	3.87	19.76
1150733288	uncharacterized protein LOC109851579 [Asparagus officinalis]	37.874	19	6	45	6	368	40.5	6.33	71.73	6	0.415	0.347	0.972	0.862875	0.811234	0.99147	23.94	0.11	12.79	172.7	67.4	59.9	5.14	26.24	36.68
1150682857	glutathione S-transferase DHAR2-like [Asparagus officinalis]	58.586	44	6	56	5	217	24.1	5.11	147.48	6	0.419	0.187	0.411	0.872815	0.31236	0.0490835	18.94	13.2	8.05	184.7	77.3	38	28.29	13.17	16.11
1150684778	LOW QUALITY PROTEIN: omega-hydroxypalmitate O-feruloyl transferase-like [Asparagus officinalis]	25.746	17	6	21	6	425	46.9	5.88	52.35	6	0.419	2.615	5.873	0.872815	0.471166	5.02059e-13	8.84	3.02	12.62	84.3	31.4	184.3	25.87	27.6	43.93
1150724081	acetylornithine aminotransferase, mitochondrial-like [Asparagus officinalis]	26.399	16	6	48	5	451	48.7	6.47	94.15	6	1.545	2.099	1.315	0.876807	0.668649	0.786185	9.07	4.69	7.8	65	100.5	134.5	3.03	6.56	1.85
1150709508	cysteine protease XCP1-like [Asparagus officinalis]	44.135	23	6	53	2	346	39.2	5.33	170.88	6	0.299	0.341	0.766	0.880319	0.917884	0.916613	47.17	30.67	17.48	180	63.1	56.9	22.75	33.87	11.92
Q6YZX6	Putative aconitate hydratase, cytoplasmic OS=Oryza sativa subsp. japonica OX=39947 GN=Os08g0191100 PE=3 SV=1	15.343	5	6	42	1	898	98	6.01	68.22	6	0.277	0.311	1.652	0.895003	0.92641	0.706454	51.02	45.87	82.17	185.6	51.4	63.1	28.96	59.22	28.89
1150676453	phosphomethylethanolamine N-methyltransferase-like isoform X1 [Asparagus officinalis]	26.539	16	6	21	6	503	57.7	5.85	19.7	6	1.805	1.327	0.698	0.900326	0.931854	0.573476	7.74	16.49	0.54	77.4	131.2	91.3	46.22	48.25	25.49
P04464	Calmodulin OS=Triticum aestivum OX=4565 PE=1 SV=3	33.197	42	6	42	1	149	16.8	4.25	67.05	6	1.875	4.983	3.428	0.904473	0.584747	0.0198203	1.24	12	2.74	34.9	59.9	205.3	22.95	35.75	20.26
1150726801	LOW QUALITY PROTEIN: ATP-citrate synthase alpha chain protein 2-like [Asparagus officinalis]	29.821	19	6	57	4	410	45.2	5.24	134.43	6	0.465	0.328	0.758	0.913724	0.80828	0.916613	8.72	30.42	21.49	158.9	75.6	65.5	27.16	20.59	34.05
1150677196	protein BTR1-like [Asparagus officinalis]	38.481	27	6	58	6	339	36.1	6.24	99.38	6	1.416	1.45	1.144	0.924734	0.893591	0.941138	1.09	8.34	10.1	77.2	109.3	113.5	12.11	20.91	21.72
1150746460	eukaryotic translation initiation factor [Asparagus officinalis]	39.431	31	6	52	6	203	23.1	6.37	109.28	6	1.378	1.281	0.931	0.924734	0.910432	0.948133	13.13	22.83	0.21	92.4	107.5	100.1	14.21	20.05	24.7
1150701038	UMP-CMP kinase 3-like [Asparagus officinalis]	31.601	29	6	32	4	208	23.2	6.11	41.01	6	0.483	0.734	1.52	0.924734	0.983932	0.568501	1.87	10.66	14.08	138.9	67.9	93.2	35.73	36.18	34.55
Q8S528	Aldehyde dehydrogenase family 2 member B7, mitochondrial OS=Arabidopsis thaliana OX=3702 GN=ALDH2B7 PE=1 SV=2	19.719	12	6	66	3	534	58.1	7.33	84.64	6	1.673	1.789	1.056	0.931663	0.893232	0.990161	1.56	1.9	14.49	66.4	114.9	118.8	6.39	12.49	10.55
1150744316	cytochrome b5-like [Asparagus officinalis]	56.982	43	6	64	6	134	14.9	5.15	175.94	6	0.532	0.879	1.586	0.933392	0.990572	0.34205	6.09	1.66	19.04	125.2	63.5	111.3	7.56	11.84	16.23
1150692553	40S ribosomal protein S2-2-like [Asparagus officinalis]	102.694	29	6	76	6	187	20.3	10.2	244.53	6	0.545	0.49	0.899	0.935133	0.893591	0.918496	45.69	68.16	3.79	155.9	75.9	68.2	6.4	49.1	90.29
1150717569	myb-like protein X [Asparagus officinalis]	47.71	10	6	66	6	793	88.8	5.34	157.53	6	1.402	1.518	1.082	0.937836	0.901572	0.972144	18.44	2.01	0.11	76	113.4	110.5	6.48	11.14	10.35
O23979	Soluble inorganic pyrophosphatase OS=Hordeum vulgare subsp. vulgare OX=112509 GN=IPP PE=2 SV=1	35.375	28	6	80	2	215	24	6.23	184.37	6	0.406	0.215	0.747	0.940913	0.817316	0.916613	22.41	22.81	81.03	192	67.7	40.2	20.75	18.2	81.35
1150735608	eukaryotic initiation factor 4A-3 [Asparagus officinalis]	37.366	15	6	31	4	409	46.2	6.71	91.14	6	0.524	0.33	0.629	0.940913	0.831895	0.568501	4.3	6.21	1.85	160.7	84.2	55.2	10.36	6.67	24.85
1150742436	photosynthetic NDH subunit of lumenal location 5, chloroplastic-like, partial [Asparagus officinalis]	61.076	36	6	159	6	220	24.1	9.23	303.4	6	1.383	1.428	1.111	0.940913	0.901038	0.961747	0.93	2.38	8.86	79.9	105.6	114.5	2.7	3.93	10.32
1150716090	3-deoxy-manno-octulosonate cytidylyltransferase, mitochondrial-like [Asparagus officinalis]	66.662	32	6	68	6	298	32.6	6.99	200.05	6	0.508	0.438	0.862	0.940913	0.901572	0.946676	15.44	85.68	78.4	154.2	78.3	67.5	10.49	6.67	70.29
1150679590	serine hydroxymethyltransferase 3, chloroplastic isoform X1 [Asparagus officinalis]	27.586	13	6	43	2	524	57	7.53	88.25	6	0.527	0.44	0.834	0.940913	0.905257	0.931296	7.6	29.07	136.05	147.5	82	70.5	6.02	75.12	67.81
1150734286	hypersensitive-induced response protein 1-like [Asparagus officinalis]	48.925	26	6	75	1	285	31.5	5.33	193.57	6	0.339	0.369	0.493	0.940913	0.949627	0.585916	7.18	83.82	31.31	204.5	66.1	29.4	71.96	25.25	69.57
1150708907	plastidial pyruvate kinase 2 [Asparagus officinalis]	37.07	21	6	22	5	572	62.7	6.74	45.18	6	0.467	1.042	1.748	0.940913	0.975448	0.447153	36.28	25.17	31.09	130	48.8	121.2	16.12	48.18	24.65
P49026	Guanine nucleotide-binding protein subunit beta-like protein OS=Nicotiana tabacum OX=4097 GN=ARCA PE=2 SV=1	23.339	18	6	109	1	326	35.9	6.86	181.96	6	1.394	0.921	1.091	0.940913	0.982884	0.972144	67.28	14.19	66.33	77.3	107.8	114.9	39.1	39.27	33.01
1150683411	flavonoid 3',5'-methyltransferase-like [Asparagus officinalis]	50.798	42	6	46	6	243	27.6	5.64	98.7	6	0.523	0.727	0.947	0.940913	0.983932	0.972144	12.9	14.01	25.06	134.5	70.2	95.3	5.61	40.7	23.67
1150670145	pto-interacting protein 1-like isoform X1 [Asparagus officinalis]	24.623	22	6	31	5	361	39.1	7.85	42.56	6	1.388	1.949	1.62	0.945828	0.893591	0.623869	0.75	23.67	5.45	71.8	88.4	139.8	7.84	11.42	28.93
1150706619	ABC transporter E family member 2 isoform X1 [Asparagus officinalis]	57.077	15	6	54	6	610	68.7	7.83	129.92	6	0.511	0.547	1.143	0.947558	0.934163	0.924379	16.04	24.42	8.56	146	74.4	79.6	7.04	30.52	28.88
1150741801	prohibitin-1, mitochondrial-like, partial [Asparagus officinalis]	60.833	39	6	92	1	268	29.3	9.6	221.33	6	1.376	0.479	0.36	0.947558	0.966238	0.14646	0.13	88.56	86.46	106.8	142	51.2	5.04	5.72	100.5
1150699873	SNARE-interacting protein KEULE [Asparagus officinalis]	20.206	11	6	14	6	662	75.2	8.15	27.09	6	1.357	5.993	2.137	0.948496	0.0251984	0.0260056	1.21	98.74	45.1	35.7	65.2	199.1	20.28	33.05	114.18
1150749848	LOW QUALITY PROTEIN: protein transport protein SEC23-like [Asparagus officinalis]	40.289	11	6	26	2	845	93.6	6.01	47.47	6	0.362	0.123	0.676	0.948801	0.674134	0.896581	0.37	22.68	84.03	202.1	73.1	24.8	5.27	43.63	100.48
1150700944	acetylornithine deacetylase [Asparagus officinalis]	38.322	34	6	20	6	299	33	5.52	50.58	6	0.535	0.431	0.806	0.948801	0.903381	0.916613	5.65	11.85	4.73	152.6	81.6	65.8	2.37	7.14	10.67
1150683419	flavonoid 3',5'-methyltransferase-like [Asparagus officinalis]	69.851	27	6	79	6	241	26.8	5.4	240.98	6	1.25	1.966	1.259	0.949282	0.722037	0.884087	32.71	11.77	21.74	74.5	97.1	128.3	25.4	4.48	16.73
1150743679	methylthioribose-1-phosphate isomerase [Asparagus officinalis]	50.74	15	6	55	6	372	39.1	6.1	176.59	6	1.31	1.621	1.191	0.949282	0.858128	0.916613	10.52	3.01	1.78	75.9	102.3	121.8	8.07	13.97	7.62
1150748727	uncharacterized protein At2g27730, mitochondrial [Asparagus officinalis]	91.054	50	6	128	6	116	12.5	9.7	360.54	6	0.613	0.507	0.858	0.949282	0.901572	0.916613	2.99	10.44	5.43	141.3	87.6	71.1	4.73	12.73	14.57
1150733180	serine/arginine-rich-splicing factor SR34-like isoform X1 [Asparagus officinalis]	29.447	28	6	32	4	289	32.8	11.33	57.69	6	0.555	0.404	0.816	0.949282	0.905257	0.916613	9.41	4.76	29.44	152.7	84.8	62.5	7.8	17.85	27.78
1150747243	60S ribosomal protein L32-1 [Asparagus officinalis]	74.271	41	6	98	2	133	15.6	10.7	274.43	6	0.551	0.366	0.669	0.949282	0.910432	0.766248	37.21	1.12	4.19	154.6	92.6	52.8	7.64	25.01	17.32
1150699270	monothiol glutaredoxin-S11 [Asparagus officinalis]	36.213	16	6	28	6	488	53.3	5.41	74.88	6	0.571	0.492	0.927	0.949282	0.910432	0.9694	12.17	0.68	11.44	145.4	83.1	71.5	7.44	19.35	33.89
1150738645	probable signal peptidase complex subunit 2 [Asparagus officinalis]	44.736	28	6	52	6	282	31.8	9.91	106.35	6	1.148	1.274	1.104	0.949282	0.912418	0.964347	0.89	4.48	10.37	90.5	104.5	104.9	9.63	11.31	5.59
1150701562	subtilisin-like protease SBT3.17 [Asparagus officinalis]	45.413	35	6	66	6	139	14.7	7.14	188.34	6	0.61	0.538	0.883	0.949282	0.919359	0.916613	22.67	35.28	13.21	149.7	79.8	70.5	13.3	27.53	46.36
1150697897	LOW QUALITY PROTEIN: uncharacterized protein At1g03900 [Asparagus officinalis]	20.564	34	6	18	6	264	28	6.04	26.68	6	1.144	1.147	0.905	0.949282	0.935141	0.937637	11.38	5.69	1.55	87.5	112.1	100.4	14.11	9.8	2.05
1150709629	uncharacterized protein LOC109841028 [Asparagus officinalis]	32.755	17	6	57	6	489	53.7	6.92	103.35	6	0.533	0.567	1.09	0.949282	0.942726	0.960679	4.08	3.6	7.58	150.8	69.2	80	9.69	13.78	6.26
1150699127	IAA-amino acid hydrolase ILR1-like 7 [Asparagus officinalis]	52.389	24	6	48	6	426	46.7	5.95	131.71	6	0.541	0.579	1.066	0.949282	0.949457	0.990161	18.29	16.76	0.7	142.3	76.1	81.5	6.9	22.74	22.28
1150674841	LOW QUALITY PROTEIN: eukaryotic translation initiation factor 3 subunit D-like, partial [Asparagus officinalis]	40.501	16	6	64	6	520	59.4	9.29	112.9	6	1.207	0.607	0.502	0.949282	0.950938	0.0244798	2.88	33.69	30.16	106.6	128.7	64.7	18.19	12.37	24.02
1150712722	uncharacterized protein LOC109842658 [Asparagus officinalis]	27.903	19	6	23	6	392	41.9	8.31	40.5	6	1.229	1.213	1.027	0.949282	0.954542	0.995088	5.72	16.65	13.14	85.6	107.7	106.7	8.01	9.45	9.45
1150728169	ABC transporter F family member 1 [Asparagus officinalis]	29.656	12	6	53	6	599	67.2	6.38	103.57	6	1.342	1.169	0.976	0.949282	0.966157	0.995088	3.32	9.73	18.38	91.1	109.1	99.9	19.62	16.97	4.82
1150682584	uncharacterized protein LOC109829822 [Asparagus officinalis]	62.515	23	6	135	6	291	32.6	4.88	372.63	6	1.282	1.038	0.728	0.949282	0.966238	0.588148	15.32	3.39	1.61	84.8	125.1	90.1	52.84	43.85	40.06
1150700603	glutamate-1-semialdehyde 2,1-aminomutase, chloroplastic-like [Asparagus officinalis]	27.101	19	6	36	6	470	50	6.95	70.25	6	0.573	0.661	1.027	0.949282	0.974473	0.995088	9.73	20.42	18.27	134.3	76.9	88.7	3.28	14.64	20.68
1150691386	metacaspase-4-like [Asparagus officinalis]	46.144	15	6	53	6	416	45.6	5.55	119.06	6	0.572	0.684	1.227	0.949282	0.98003	0.881176	2.5	2.69	3.77	135.2	74	90.8	9.71	11.53	23.91
1150736072	LOW QUALITY PROTEIN: ruvB-like protein 1 [Asparagus officinalis]	31.341	18	6	32	6	457	50	6.05	61.49	6	0.575	0.675	1.174	0.949282	0.983932	0.957433	1.42	10.94	5.05	131.4	74.5	94.1	11.65	12.46	12.65
1150724373	clathrin interactor EPSIN 2 [Asparagus officinalis]	34.193	13	6	32	6	836	90.1	6.34	41.41	6	1.284	1.611	1.33	0.95218	0.905257	0.860635	13.46	21.98	29.12	91.6	82.7	125.7	25.23	21.47	18.5
1150714892	uncharacterized protein LOC109843561 [Asparagus officinalis]	53.966	44	6	99	6	111	12.4	6.2	227.53	6	1.207	1.099	0.911	0.95218	0.957385	0.93554	3.61	6.79	3.33	93	109.5	97.5	15.78	12.69	8.12
1150719165	uncharacterized protein At2g34160-like [Asparagus officinalis]	51.089	39	6	39	3	129	14.2	5.59	97.78	6	0.632	0.334	0.511	0.955272	0.818237	0.240526	19.62	5.29	4.92	162.7	90.8	46.4	12.96	34.47	15.75
1150693072	GEM-like protein 1 [Asparagus officinalis]	34.537	34	6	28	6	274	29.4	6.54	52.2	6	1.111	1.352	1.225	0.955272	0.901572	0.916613	6.4	7.46	1	85.6	95.1	119.3	8.96	7.36	2.35
1150726395	eukaryotic translation initiation factor 2 subunit beta-like [Asparagus officinalis]	40.186	25	6	62	6	263	29.8	6.58	127.97	6	1.179	1.227	1.022	0.955272	0.92641	0.999335	2.68	6.78	9.58	96.1	102.9	101	11.73	12.01	12.22
1150672892	transmembrane emp24 domain-containing protein p24beta2-like [Asparagus officinalis]	46.046	40	6	53	6	212	24.6	6.46	114.18	6	1.081	1.182	1.223	0.958155	0.929358	0.916613	15.7	5.81	11.32	82.2	97.9	119.8	16.27	10.91	21.74
1150724709	polyadenylate-binding protein RBP45-like [Asparagus officinalis]	34.027	28	6	45	5	341	38.4	5.69	92.32	6	1.145	1.324	1.312	0.958943	0.919359	0.753392	21.5	44.31	4.6	81.9	93.8	124.2	8.47	10.38	30.71
1150735930	tropinone reductase homolog At2g29290-like [Asparagus officinalis]	34.043	29	6	60	5	261	27.6	5.64	146.17	6	1.155	1.133	0.969	0.958943	0.942726	0.984408	14.14	1.79	0.59	88.7	107.3	104	3.13	10.85	4.39
1150689930	DNA ligase 1-like [Asparagus officinalis]	46.636	18	6	43	6	403	46.7	7.08	91.77	6	0.647	0.493	0.841	0.959365	0.916935	0.916613	15.28	3.24	19.75	141.2	82.8	76	24.26	38.62	15.09
1150715114	uncharacterized protein At2g17340-like [Asparagus officinalis]	32.076	14	6	35	6	368	41.3	5.11	73.71	6	1.238	1.41	1.216	0.959365	0.92641	0.916613	3.13	9.05	2.32	84.4	96.5	119.1	8.36	4.75	8.43
1150749228	secretory carrier-associated membrane protein 4-like [Asparagus officinalis]	39.48	28	6	39	6	266	29.9	8.02	85.75	6	0.658	0.576	0.857	0.959365	0.950938	0.933623	3.02	25.16	16.8	133.5	89.7	76.8	17.1	17.65	36.3
1150720972	probable aldehyde dehydrogenase [Asparagus officinalis]	35.061	12	6	76	3	622	68.9	5.01	148.11	6	1.129	1.133	0.998	0.959365	0.950938	0.995088	12.42	10.59	0.69	99.7	100.3	100.1	11.76	11.93	11.36
1150707288	LOW QUALITY PROTEIN: serine/threonine-protein phosphatase 2A 65 kDa regulatory subunit A beta isoform-like [Asparagus officinalis]	33.204	12	6	65	5	577	64.3	5.08	144.36	6	1.061	1.084	1.031	0.959365	0.950938	0.995825	1.33	1.82	0.48	98.3	104.3	97.4	8.28	11.22	7.31
1150708863	glutamate synthase 1 [NADH], chloroplastic isoform X1 [Asparagus officinalis]	35.509	4	6	29	6	2191	241	6.95	56.85	6	0.643	0.704	1.236	0.959365	0.98003	0.916613	3.35	26.76	11.87	131.1	86.3	82.6	17.64	22.62	37.97
1150676777	ras-related protein RABB1c-like [Asparagus officinalis]	33.992	39	6	30	3	210	23	7.44	81.99	6	0.67	0.743	1.281	0.959365	0.98377	0.916613	11.27	23.28	6.07	127.8	84.4	87.9	8.06	11.95	16.24
1150727209	protein CYPRO4-like [Asparagus officinalis]	23.232	11	6	31	5	646	72.1	6.25	54.68	6	0.628	0.725	1.189	0.959365	0.993356	0.948133	1.06	5.36	0.16	133.3	83.7	83	12.26	14.01	22.45
1150742780	LOW QUALITY PROTEIN: ubiquitin carboxyl-terminal hydrolase FAM188A [Asparagus officinalis]	31.742	10	6	36	6	610	67.1	5.4	79.12	6	1.188	1.141	0.961	0.960709	0.966091	0.990161	8.42	14.23	25.05	90.1	107	102.8	5.56	14.39	8.05
1150732399	mitochondrial Rho GTPase 1-like [Asparagus officinalis]	34.08	17	6	21	5	511	57.4	6.86	43.06	6	0.675	0.637	0.914	0.960709	0.974053	0.972144	10.42	5.04	14.29	128.6	86.7	84.7	2.57	14.42	5.36
1150693107	AP-4 complex subunit mu [Asparagus officinalis]	26.44	17	6	31	6	452	50.7	6.58	60.58	6	1.023	1.05	1.703	0.961314	0.957023	0.192873	80.04	34.98	32.76	69.6	85.2	145.2	62.3	40.21	68.5
1150669587	26S proteasome non-ATPase regulatory subunit 8 homolog A [Asparagus officinalis]	52.28	28	6	64	6	267	30.7	5.11	149.04	6	0.651	0.426	0.696	0.963282	0.893591	0.546227	9.56	17.76	28.47	139.4	93.8	66.8	8.62	2.85	29.38
1150723654	soluble inorganic pyrophosphatase 6, chloroplastic, partial [Asparagus officinalis]	46.33	29	6	58	5	273	30.5	5.82	105.04	6	0.648	0.828	1.15	0.963282	0.999557	0.921803	16.48	10.85	0.43	115.9	85.6	98.5	9.94	13.27	17.35
1150746634	histone H1oo-like [Asparagus officinalis]	36.465	12	6	22	6	442	47.9	11.34	40	6	0.618	0.318	0.898	0.967259	0.903873	0.988297	19.23	46.81	12.66	180.6	66.9	52.5	37.47	48.11	15.86
1150723526	LOW QUALITY PROTEIN: 3-oxo-Delta(4,5)-steroid 5-beta-reductase-like [Asparagus officinalis]	53.98	43	6	75	6	264	29.9	6.55	161.72	6	1.045	0.982	1.012	0.967259	0.973311	0.995088	28.73	11.99	10.56	99.8	96.9	103.3	10.4	16.74	16.61
1150700507	ubiquitin-like modifier-activating enzyme 5 [Asparagus officinalis]	27.61	12	6	27	6	426	46.8	4.88	37.09	6	0.693	0.65	1.001	0.967259	0.98003	0.996646	14.31	14.84	8.29	128.7	88.4	82.9	3.06	13.29	11.68
Q9M531	Histone H2A OS=Euphorbia esula OX=3993 PE=2 SV=1	105.514	49	6	115	2	153	16	10.56	533.39	6	0.99	0.659	0.638	0.969429	0.974053	0.281397	6.13	29.79	34.69	116.9	106	77.1	7.16	29.34	78.1
1150687308	acyl-CoA-binding domain-containing protein 4-like [Asparagus officinalis]	35.598	12	6	51	6	669	73	5.19	100.37	6	0.985	1.075	1.128	0.971252	0.962593	0.946356	8.24	13.96	4.93	101.6	93.7	104.7	22.72	19.86	14.01
1150683403	60S ribosomal protein L17 [Asparagus officinalis]	23.406	28	6	43	1	183	20.8	10.33	83.9	6	1.089	0.029	0.077	0.973328	0.00309327	2.75261e-15	14.86	9.56	118.37	149	145.5	5.5	20.98	86.37	52
1150721605	fumarate hydratase 1, mitochondrial [Asparagus officinalis]	61.96	25	6	83	6	423	45.4	7.37	180.62	6	0.695	0.678	0.978	0.973328	0.975448	0.990161	11.78	12.22	0.48	129.4	86.4	84.3	3.91	12.16	11.73
1150682761	citrate synthase 4, mitochondrial [Asparagus officinalis]	40.626	15	6	85	1	471	52.4	8.18	250.47	6	0.963	0.893	0.928	0.973328	0.983932	0.976737	15.47	9.41	5.49	106.7	102.7	90.7	67.36	5.52	5.13
1150699474	uncharacterized protein LOC109836937 isoform X1 [Asparagus officinalis]	29.611	7	6	24	6	935	103.9	5.38	42.77	6	1.045	1.396	1.246	0.975174	0.910432	0.853339	1.43	6.43	19.1	86.5	92.8	120.7	2.84	5.51	11.8
1150700576	la protein 1-like [Asparagus officinalis]	42.446	22	6	29	6	464	51.5	5.11	86.43	6	0.733	0.739	1.008	0.975174	0.98377	0.998638	12.08	17.05	5.63	136.3	84.1	79.6	22.65	17.73	17.43
1150723735	uncharacterized protein LOC109847828, partial [Asparagus officinalis]	31.779	31	6	44	6	237	25.9	6.52	49.7	6	0.685	0.759	1.108	0.975174	0.990654	0.957433	3.39	8.51	4.85	116.5	88.6	94.9	7.81	6.4	24.46
1150700245	uridine kinase-like protein 1, chloroplastic isoform X2 [Asparagus officinalis]	32.029	20	6	28	3	418	47.4	7.34	57.18	6	0.982	0.865	1.119	0.979602	0.98377	0.970452	40.05	52.59	92.49	104.1	92.5	103.5	17.47	36.98	82.14
1150705534	60S ribosomal protein L15-1-like [Asparagus officinalis]	22.552	25	6	65	6	204	24.4	11.43	119.69	6	1.022	0.795	0.778	0.985635	0.990002	0.754548	1.06	45.05	45.79	106.5	108.8	84.6	8.04	9.33	32.25
1150709125	protein transport protein SEC13 homolog B-like [Asparagus officinalis]	54.132	38	6	44	6	288	31.2	6.52	105.87	6	0.77	0.736	0.98	0.987812	0.98377	0.98702	3.64	17.38	14.16	121.5	93.5	85	7.88	13.73	10.9
P51851	Pyruvate decarboxylase 2 (Fragment) OS=Pisum sativum OX=3888 GN=PDC2 PE=2 SV=1	34.706	19	6	76	1	405	44.1	6.68	166.43	6	0.758	0.421	0.551	0.991268	0.889543	0.199866	20.35	27.63	18.79	138.3	103.4	58.2	36.51	31.73	16.81
1150734367	ubiquitin-conjugating enzyme E2 variant 1C [Asparagus officinalis]	47.948	59	6	103	4	147	16.7	7.03	215.18	6	1.038	0.984	0.909	0.991268	0.98003	0.959933	3.19	6.25	18.63	97.1	100.8	102.1	10.79	21.4	10.62
Q9FPT1	Ubiquitin carboxyl-terminal hydrolase 12 OS=Arabidopsis thaliana OX=3702 GN=UBP12 PE=1 SV=2	55.523	8	6	123	1	1116	130.5	5.77	283.34	6	0.928	0.723	0.41	0.991268	0.999557	0.317068	97.6	30.39	33.07	118.5	110	71.5	118.86	53.33	44.64
1150691461	auxin-repressed 12.5 kDa protein [Asparagus officinalis]	50.089	80	6	60	6	122	13.3	9.57	134.8	6	0.931	0.227	0.448	0.991757	0.430655	0.00866676	19.07	4.38	67.56	139	129.5	31.5	14.32	46.88	95.67
1150749786	subtilisin-like protease SBT1.2 [Asparagus officinalis]	30.053	14	6	28	4	717	77.6	7.46	67.9	6	0.991	1.417	1.538	0.991757	0.92641	0.342549	6.44	11.12	16.47	79.9	79.2	141	13.93	22.5	26.7
1150670022	protein transport protein Sec61 subunit alpha-like [Asparagus officinalis]	27.851	13	6	51	6	476	52.2	8.82	100.42	6	0.733	1.143	1.559	0.991757	0.936888	0.360258	18.85	10.59	6.91	95.9	83.7	120.4	15.97	16.97	12.42
1150705932	pectin acetylesterase 7-like [Asparagus officinalis]	52.239	17	6	70	6	391	43	8.34	205.06	6	0.891	0.802	0.834	0.991757	0.999557	0.909623	23.06	13.19	31.95	113.3	90.5	96.2	16.77	22.79	36.47
1150705754	cytochrome b5 [Asparagus officinalis]	88.994	37	6	107	6	134	14.9	5.29	286.72	6	0.96	1.427	1.487	0.993913	0.901273	0.50923	1.06	0.27	1.86	87	89	123.9	6.23	7.35	5.99
1150734074	SAM50-like protein SPAC17C9.06 [Asparagus officinalis]	24.667	13	6	19	6	528	58.3	5.16	37.07	6	0.934	1.314	1.407	0.993913	0.92641	0.603444	0.14	31.31	31.14	93.3	85.9	120.8	1.37	23.39	42.99
A2YDY2	60S ribosomal protein L11 OS=Oryza sativa subsp. indica OX=39946 GN=RPL11 PE=2 SV=2	34.014	30	6	115	1	182	20.8	9.92	235.33	6	0.626	0.486	0.777	0.993913	0.966238		27.88	15.72	1.85	145.3	84	70.7	26.78	24.87	12.69
1150676739	eukaryotic translation initiation factor 2 subunit alpha homolog [Asparagus officinalis]	31.936	19	6	85	5	345	38.6	5.33	152.1	6	0.8	0.674	0.955	0.993913	0.967513	0.987597	16.01	23.04	26.2	122	91	87	6.55	11.1	33.2
1150731789	LOW QUALITY PROTEIN: importin-5-like [Asparagus officinalis]	31.566	7	6	36	6	1112	122.3	4.78	67.34	6	0.772	0.93	1.142	0.993913	0.98003	0.932464	5.15	2.8	1	107.8	90.1	102.2	9.91	10.26	13.08
1150747594	nucleoside diphosphate kinase 1 [Asparagus officinalis]	69.208	33	6	143	5	148	16.5	6.8	399.14	6	0.822	0.751	0.907	0.993913	0.982884	0.932464	4.79	3.92	0.9	116.6	99.1	84.4	6.83	4.16	4.65
1150726432	omega-amidase, chloroplastic [Asparagus officinalis]	35.121	20	6	33	6	363	39.8	7.74	100.64	6	0.819	0.716	0.874	0.993913	0.982884	0.936413	1.09	4.48	18.34	118.4	96.9	84.7	5.04	10.03	7.77
1150698868	protein-L-isoaspartate O-methyltransferase-like isoform X1 [Asparagus officinalis]	45.935	39	6	54	5	263	28.5	7.61	138.47	6	0.951	0.991	0.897	0.993913	0.983932	0.953876	15.23	26.47	19.73	103	95.1	102	5.95	11.26	21.97
1150748318	large proline-rich protein BAG6 isoform X2 [Asparagus officinalis]	37.151	11	6	24	6	1045	109.1	5.24	44.75	6	0.977	0.78	0.875	0.993913	0.985953	0.946676	4.92	12.84	1.94	119.2	95.8	84.9	13.54	14.17	6.36
1150714738	long chain acyl-CoA synthetase 8 [Asparagus officinalis]	42.42	12	6	43	6	729	80.3	7.9	56.79	6	0.937	0.89	0.847	0.993913	0.999557	0.916613	14.28	2.6	5.36	109.7	104.7	85.6	12.62	21.67	12.07
1150727774	60S ribosomal protein L22-2-like [Asparagus officinalis]	43.45	50	6	80	5	124	13.9	9.55	166.47	6	0.954	0.82	0.859	0.993913	0.999557	0.916613	22.53	24.32	1.55	110	102.2	87.8	2.27	15.06	24.87
1150696389	nuclear-pore anchor [Asparagus officinalis]	22.863	3	6	21	6	2046	232	5.15	27.11	6	0.913	0.963	1.047	0.994359	0.98003	0.990161	2.67	1.03	1.5	106.8	94.4	98.8	6.8	7.5	6.26
1150676325	far upstream element-binding protein 2-like [Asparagus officinalis]	55.523	15	6	64	6	474	49.8	6.23	150.61	6	0.831	0.639	0.752	0.996716	0.968326	0.664845	4.23	3.35	0.98	120.9	101.8	77.3	2.41	5.59	5.31
1150670139	NADP-dependent D-sorbitol-6-phosphate dehydrogenase-like [Asparagus officinalis]	33.934	25	6	30	6	309	34.9	6.37	76.12	6	0.831	0.738	0.967	0.996716	0.983932	0.980672	5.51	0.24	3.33	116.8	96.9	86.3	2.33	4.78	7.86
1150671332	uncharacterized protein LOC109828428 [Asparagus officinalis]	23.497	25	6	70	6	202	23.5	9.74	114.99	6	0.911	0.881	0.989	0.996716	0.996321	0.990161	26.72	24.72	36.8	102.8	90	107.2	11.4	29.69	34.22
1150680001	translation machinery-associated protein 22 [Asparagus officinalis]	47.518	32	6	80	6	199	21.7	7.66	190.16	6	0.83	1.057	1.252	0.997415	0.961383	0.844073	2.48	13.24	16.88	104.4	88.1	107.5	15.24	16.65	5.72
1150712324	LOW QUALITY PROTEIN: uncharacterized protein LOC109842407 [Asparagus officinalis]	27.26	6	6	22	6	1302	139.4	7.74	25.38	6	0.904	1.033	1.147	0.998714	0.98003	0.946676	12.86	11.32	0.56	107.7	89.6	102.7	18.67	14.55	14.12
1150699389	alpha-soluble NSF attachment protein-like [Asparagus officinalis]	35.642	22	6	61	2	289	32.7	5.19	126.18	6	0.734	0.657	0.975	0.998724	0.990572	0.995825	24.9	84.79	13.33	136.5	86.3	77.2	20.98	53.39	90.01
P27164	Calmodulin-related protein OS=Petunia hybrida OX=4102 GN=CAM53 PE=2 SV=2	23.078	34	6	35	1	184	21.1	4.78	49.38	6	0.894	4.948	5.533		0.392562	0.00170478	25.59	56.59	72.41	38.8	42	219.2	32.75	53.89	40.04
1150681514	18.1 kDa class I heat shock protein-like [Asparagus officinalis]	48.595	36	7	114	1	163	18.4	6.09	258.43	7	0.035	0.06	1.897	0.00235615	0.196914	0.512322	18.57	13.98	2.84	275.9	9.6	14.5	19.16	55.28	15.55
Q9LV21	T-complex protein 1 subunit delta OS=Arabidopsis thaliana OX=3702 GN=CCT4 PE=1 SV=1	51.862	16	7	46	1	536	57.7	7.68	113.8	7	0.054	0.039	0.722	0.0092934	0.0343179	0.916613	17.61	8.35	6.88	275	14.8	10.2	8.79	26.01	21.91
1150715426	uncharacterized protein C24B11.05 [Asparagus officinalis]	61.442	36	7	38	7	263	29.4	5.17	97.28	7	0.137	0.118	0.958	0.045864	0.122256	0.998848	27.06	15.66	8.07	246	28.5	25.5	13.37	29.69	11.63
1150701928	arginase 1, mitochondrial [Asparagus officinalis]	70.948	34	7	54	7	341	37.1	6.38	172.69	7	0.168	0.104	0.62	0.0465957	0.0183104	0.603444	7.91	5.93	14.63	235.6	39.7	24.8	3.28	12.53	10.87
1150670588	LOW QUALITY PROTEIN: 2-isopropylmalate synthase A-like, partial [Asparagus officinalis]	39.408	18	7	30	7	522	56.4	6.55	73.14	7	0.208	0.119	0.571	0.120344	0.0253604	0.13317	12.67	94.76	46.35	241.1	40.2	18.7	29.52	38.13	106.12
1150676534	reticulon-like protein B4 [Asparagus officinalis]	73.776	22	7	122	5	268	30.1	8.65	288.28	7	0.258	0.223	1.01	0.249196	0.328404	0.99536	25.05	24.29	39.29	197.6	58.8	43.6	13.75	30.16	82.14
P49027	Guanine nucleotide-binding protein subunit beta-like protein A OS=Oryza sativa subsp. japonica OX=39947 GN=RACK1A PE=1 SV=1	48.661	24	7	113	2	334	36.2	6.44	219.59	7	0.204	0.133	1.44	0.29259	0.269452	0.906263	31.9	113.47	75.76	230.3	47.1	22.6	16.95	56.1	115.1
Q41246	14-3-3-like protein OS=Nicotiana tabacum OX=4097 PE=2 SV=1	58.767	23	7	137	1	251	28.6	5.02	243	7	2.585	2.228	0.862	0.428866	0.721767	0.916613	10.97	33.68	18.51	59.3	121.3	119.4	18.41	38.93	50.95
1150749259	40S ribosomal protein S20-1-like [Asparagus officinalis]	39.817	45	7	117	1	121	13.3	9.51	243.53	7	0.287	0.472	1.682	0.460954	0.896284	0.163935	3.06	9.99	7.5	171.4	59.5	69	18.09	20.19	27.49
1150747744	sporulation-specific protein 15-like [Asparagus officinalis]	32.601	9	7	29	7	1076	122.8	5.08	39.6	7	2.441	2.351	1.199	0.489017	0.565101	0.916613	1.05	7.7	29.23	56.6	110.4	133	27.56	24.34	0.73
1150701766	uncharacterized protein LOC109837721 [Asparagus officinalis]	51.94	33	7	49	7	272	30.2	5.83	105.58	7	0.297	0.341	0.897	0.542153	0.756541	0.955876	6.66	0.83	8.64	172.1	69.2	58.7	59.75	54.05	45.18
1150716638	serine hydroxymethyltransferase 3, chloroplastic-like [Asparagus officinalis]	42.069	22	7	42	3	421	46.1	7.15	101.15	7	0.2	0.145	0.725	0.553707	0.642963	0.916613	43.91	37.51	2.82	228.2	39.9	31.9	16.54	30.16	26.15
1150708566	V-type proton ATPase subunit E-like [Asparagus officinalis]	31.757	23	7	41	2	230	26.4	7.59	99.46	7	2.936	3.773	1.311	0.566839	0.464581	0.767371	39.17	17.67	2.91	40.8	111.5	147.7	7.92	29.3	18.81
1150675701	histone deacetylase HDT2-like [Asparagus officinalis]	52.522	23	7	129	7	313	33.8	4.83	252.69	7	2.151	1.789	0.82	0.578216	0.817316	0.833308	2.15	4.1	6.05	61.5	134.3	104.2	15.49	12.89	6.13
1150708871	long chain acyl-CoA synthetase 4-like [Asparagus officinalis]	43.393	15	7	69	7	655	72.9	5.62	140.75	7	2.084	4.41	2.417	0.602672	0.101681	0.00522808	10.07	67	18.47	40.2	81.6	178.2	5.39	35.99	44.41
1150747261	UPF0664 stress-induced protein C29B12.11c [Asparagus officinalis]	59.714	59	7	60	7	206	23.2	6.87	165.58	7	0.306	0.201	0.702	0.602672	0.411433	0.807088	10	45.41	38.47	197	63.3	39.6	19.46	19.71	52.46
1150670770	polygalacturonase inhibitor-like [Asparagus officinalis]	63.447	18	7	38	7	384	42.4	8.97	108.27	7	0.321	0.288	0.9	0.622519	0.706926	0.972144	3.56	29.29	32.08	182.7	57.2	60.1	36.93	39.87	17.39
1150734400	LOW QUALITY PROTEIN: aldehyde dehydrogenase family 2 member C4-like [Asparagus officinalis]	55.577	18	7	53	7	513	56	6.76	120.72	7	0.314	0.162	0.618	0.638859	0.21787	0.591423	3.49	24.67	33.88	203.7	59.7	36.6	22.94	24.01	6.23
1150727576	RNA-binding KH domain-containing protein RCF3-like isoform X1 [Asparagus officinalis]	60.173	19	7	48	7	544	57.9	6.76	93.46	7	2.132	3.896	1.772	0.645676	0.155292	0.169268	5.11	0.42	4.68	43.2	90.8	166	8.2	11.52	21.34
1150716618	bifunctional cystathionine gamma-lyase/cysteine synthase-like isoform X1 [Asparagus officinalis]	70.755	37	7	51	7	340	37	7.02	190.6	7	0.357	0.128	0.391	0.650966	0.063145	0.009995	22.7	8.58	13.35	199.4	74.1	26.6	2.49	15.98	30.86
1150743723	pyruvate kinase 1, cytosolic-like [Asparagus officinalis]	34.471	15	7	107	3	525	57.2	8.06	164.52	7	0.206	0.234	1.275	0.655998	0.838301	0.916613	18.24	64.85	8.24	209.5	41.5	49	11.32	40.66	65.36
P37830	Glucose-6-phosphate 1-dehydrogenase, cytoplasmic isoform OS=Solanum tuberosum OX=4113 GN=G6PDH PE=2 SV=1	30.108	12	7	73	1	511	58.4	6.34	155.24	7	0.295	0.275	0.947	0.661076	0.807927	0.990161	5.36	36.77	2.53	210.9	45.7	43.3	27.09	28.89	43.79
1150702654	uncharacterized protein LOC109838014 [Asparagus officinalis]	48.763	26	7	69	7	314	34.9	4.94	199.21	7	0.38	0.359	0.943	0.676066	0.742844	0.972144	9.2	10.56	1.28	172.5	65.6	61.9	10.17	22.94	59.63
1150698995	LOW QUALITY PROTEIN: diphosphomevalonate decarboxylase MVD2, peroxisomal-like [Asparagus officinalis]	56.849	18	7	75	7	425	47.1	6.61	177.97	7	1.939	2.052	1.144	0.710067	0.69463	0.946676	1.54	11.85	0.36	60.8	119.1	120.1	3.84	8.19	10.72
1150681399	alpha-xylosidase 1-like [Asparagus officinalis]	30.395	10	7	56	7	923	102.9	5.94	106.76	7	2.044	3.217	1.475	0.731647	0.409592	0.494379	28.16	21.71	3.5	51.1	102	146.9	17.28	5.78	9.04
1150678346	heterogeneous nuclear ribonucleoprotein R [Asparagus officinalis]	23.018	21	7	16	7	507	57	4.94	22.62	7	2.073	3.132	1.369	0.739741	0.384884	0.683737	8.5	7.37	16.35	49.3	96.3	154.4	23.07	30.21	34.43
1150690950	NAD(P)H dehydrogenase (quinone) FQR1 [Asparagus officinalis]	93.159	42	7	148	3	203	21.7	6.18	500.22	7	0.414	0.403	0.886	0.744247	0.800203	0.916613	10.04	13.05	21.83	172	71.2	56.8	23.99	37.62	38.08
1150694285	40S ribosomal protein S19-like [Asparagus officinalis]	40.879	38	7	132	1	143	16	10.2	330.22	7	0.216	0.426	2.263	0.75034	0.949627		39.57	5.59	9.33	183.6	39.7	76.8	1.05	27.2	9.79
Q08069	40S ribosomal protein S8 OS=Zea mays OX=4577 GN=RPS8 PE=2 SV=2	63.684	28	7	140	3	221	25	10.37	391.88	7	1.878	2.321	1.156	0.753781	0.582999	0.932464	22.1	10.85	0.14	63.9	109.6	126.5	18.4	14.32	17.57
1150715917	eukaryotic translation initiation factor 5A-2-like isoform X2 [Asparagus officinalis]	58.17	54	7	71	1	160	17.5	5.99	168.36	7	0.224	0.261	1.367	0.760788	0.890638	0.916613	48.08	65.62	21.98	207.6	39.1	53.4	27.95	35.28	68.98
1150746356	protein transport protein Sec24-like At4g32640 [Asparagus officinalis]	39.52	12	7	48	7	821	91	6.34	89.06	7	1.904	2.939	1.36	0.775049	0.43595	0.689682	2.51	27.57	8.89	51.3	97.8	150.9	4.77	31.23	30.22
1150700069	probable glutathione S-transferase [Asparagus officinalis]	33.056	34	7	41	7	220	25	5.55	59.77	7	0.409	0.48	1.172	0.780103	0.901572	0.916613	4.55	54.89	36.73	167.5	66.5	66	20.89	36.8	79.12
1150718397	aldehyde dehydrogenase family 7 member A1 [Asparagus officinalis]	79.134	23	7	94	7	507	54.2	5.81	276.78	7	0.433	0.607	1.402	0.781431	0.937322	0.661173	5.32	22.5	12.1	151.9	62.2	85.9	4.45	6.68	26.31
1150702488	dolichyl-diphosphooligosaccharide--protein glycosyltransferase subunit 2-like [Asparagus officinalis]	36.071	15	7	30	7	691	75.6	6.96	54.53	7	0.366	0.818	2.807	0.791105	0.999557	0.0277929	5.56	34.63	38.61	138.8	47.6	113.6	3.84	24.54	36.64
1150682471	26S proteasome non-ATPase regulatory subunit 7 homolog A-like [Asparagus officinalis]	97.249	41	7	88	7	316	35.7	6.86	265.97	7	0.421	0.236	0.642	0.796996	0.406488	0.367577	21.46	23.65	37.17	181.1	76.3	42.6	2.01	22.92	50.1
1150748351	probable phosphoribosylformylglycinamidine synthase, chloroplastic/mitochondrial [Asparagus officinalis]	37.466	8	7	28	7	1393	152.5	5.48	36.76	7	0.381	0.285	0.748	0.803841	0.751955	0.916613	19.76	6.74	30.58	177.7	67.7	54.6	9.06	27.2	5.86
1150731062	18.1 kDa class I heat shock protein-like isoform X2 [Asparagus officinalis]	48.03	36	7	111	1	163	18.5	6.81	244.48	7	1.836	0.639	1.602	0.803841	0.966919	0.76511	47.81	123.9	75.06	84.7	82.9	132.4	169.28	53.12	42.57
1150689368	cytochrome P450 72A15-like [Asparagus officinalis]	21.155	16	7	20	7	511	59.2	8.46	25.03	7	2.142	7.529	3.027	0.825417	0.0168239	4.71713e-05	23.99	7.38	0.12	27.2	67.8	205	19.3	26.28	35.62
1150744784	LOW QUALITY PROTEIN: succinate dehydrogenase [ubiquinone] iron-sulfur subunit 1, mitochondrial-like [Asparagus officinalis]	46.699	24	7	25	6	202	22.7	8.21	72.46	7	0.394	0.287	0.728	0.825417	0.698617	0.778838	31.54	83.11	58.82	170.2	75.1	54.7	10.02	20.83	69.3
1150746684	programmed cell death protein 4-like [Asparagus officinalis]	46.948	13	7	28	7	639	70.7	4.92	70.78	7	0.401	0.272	0.775	0.849511	0.711948	0.916613	20.82	7.69	26.41	171.2	72.6	56.2	13.22	13.39	32.33
Q6Z058	Heat shock 70 kDa protein BIP5 OS=Oryza sativa subsp. japonica OX=39947 GN=BIP5 PE=1 SV=1	58.79	9	7	127	1	676	73.5	5.22	395.23	7	0.413	0.215	0.462	0.852226	0.634641	0.242756	16.84	7.96	23.9	189.7	71.1	39.1	11.72	21.87	25.43
1150677942	LOW QUALITY PROTEIN: protein argonaute 1B-like [Asparagus officinalis]	53.742	10	7	56	2	1103	123	9.25	124.6	7	0.252	0.294	1.099	0.852226	0.905257	0.972144	61.46	9.1	36.16	194.2	50.4	55.4	12.48	74.73	45.03
1150684259	eukaryotic translation initiation factor 3 subunit M-like [Asparagus officinalis]	56.608	27	7	58	7	411	46.2	5.07	136.89	7	0.412	0.468	1.136	0.859117	0.908881	0.953876	10.53	56.5	33.29	166.5	64.1	69.4	9.57	25.55	55.17
1150670010	LOW QUALITY PROTEIN: probable pyridoxal 5'-phosphate synthase subunit PDX1 [Asparagus officinalis]	50.417	22	7	38	6	420	45.6	9.07	102.88	7	0.413	0.328	0.793	0.862157	0.789763	0.891624	1.42	13.46	11.92	159.9	78.2	62	15.38	22.41	35.97
1150749373	acyl-CoA-binding protein-like [Asparagus officinalis]	50.662	75	7	86	3	89	10	6.1	187.96	7	1.551	2.848	1.733	0.86649	0.389486	0.199866	3.86	9.01	2.52	54.2	90.9	154.9	19.53	23.27	18.87
1150701764	26S proteasome non-ATPase regulatory subunit 4 homolog [Asparagus officinalis]	53.131	26	7	37	5	405	42.6	4.67	101.46	7	0.399	0.368	0.979	0.879824	0.901572	0.990161	28.86	88.53	47.12	166.1	72.8	61.1	10.49	40.65	80.9
1150684293	protein SIEVE ELEMENT OCCLUSION B [Asparagus officinalis]	29.081	13	7	24	7	701	80.4	6.51	49.26	7	0.439	0.238	0.429	0.890219	0.642335	0.156176	26.23	19.8	5.2	195.7	73	31.3	31.13	10.81	26.57
1150680398	uncharacterized protein LOC109828852 [Asparagus officinalis]	42.375	20	7	46	7	500	55.1	7.14	112.71	7	0.467	0.39	0.84	0.892541	0.818237	0.916613	7.15	12.2	5.96	158.4	75.5	66.1	10.44	5.26	9.48
1150748002	60S ribosomal protein L7a-1 [Asparagus officinalis]	30.983	24	7	93	1	258	29.4	10.32	185.59	7	0.321	0.098	0.187	0.900326	0.539778	0.00578436	40.43	37.06	18.1	211.1	67.7	21.2	15.84	50.71	32.52
Q42806	Pyruvate kinase, cytosolic isozyme OS=Glycine max OX=3847 PE=2 SV=1	34.041	13	7	102	1	511	55.3	7.56	214.81	7	0.439	0.389	1.023	0.900326	0.901038	0.995088	0.78	34.69	20.55	163.9	72.3	63.8	14.7	29.81	57.48
1150739712	dihydrolipoyllysine-residue acetyltransferase component 1 of pyruvate dehydrogenase complex, mitochondrial [Asparagus officinalis]	43.048	19	7	36	7	515	55.9	8.82	102.01	7	0.47	0.2	0.44	0.901008	0.292264	0.0139091	5	26.54	14.19	178.8	85.4	35.7	1.61	19.83	32.83
Q31886	Ribulose bisphosphate carboxylase large chain OS=Bouvardia ternifolia OX=29783 GN=rbcL PE=3 SV=2	50.667	22	7	60	1	475	52.7	6.68	137.7	7	1.922	3.687	1.429	0.902178	0.584747	0.876706	106.57	66.93	39.07	57.9	99.7	142.4	86.34	15.56	90.47
1150672852	LOW QUALITY PROTEIN: uncharacterized protein LOC109823175 [Asparagus officinalis]	37.169	9	7	18	7	951	107.4	6.61	17.28	7	1.804	1.752	1.002	0.904	0.893591	0.995825	4.63	35.96	25.49	68.5	132.2	99.3	12.94	19.82	35.44
1150710314	3-oxo-Delta(4,5)-steroid 5-beta-reductase-like [Asparagus officinalis]	53.38	35	7	73	7	187	21.1	5.92	233.62	7	1.452	1.736	0.934	0.904473	0.809119	0.953876	9.66	22.94	21.31	68.3	119.8	111.9	21.56	12.91	14.34
1150746340	proteasome subunit beta type-5-like [Asparagus officinalis]	47.291	49	7	55	2	272	29.4	7.09	137.78	7	0.446	0.317	0.705	0.917677	0.875739	0.84721	1.95	0.33	0.76	172.7	74.8	52.5	12.24	6.07	6.26
1150743740	isocitrate dehydrogenase [NAD] regulatory subunit 1, mitochondrial-like isoform X2 [Asparagus officinalis]	57.192	29	7	61	5	366	39.8	6.73	130.87	7	1.431	1.608	1.005	0.917842	0.864568	0.995088	8.28	2.39	6.22	77.2	111.1	111.6	10.86	8.6	17.79
1150704275	heterogeneous nuclear ribonucleoprotein A1, A2/B1 homolog [Asparagus officinalis]	32.124	19	7	29	7	429	45.2	5.66	63.81	7	0.455	0.373	1.092	0.924734	0.893591	0.990161	22.56	10.71	60.4	161	79.1	60	7.64	40.53	27.35
1150699897	40S ribosomal protein S20-2-like [Asparagus officinalis]	42.123	45	7	168	1	121	13.4	9.51	383.11	7	1.495	1.431	1.095	0.925948	0.900067	0.972144	9.54	11.53	8.49	72.8	115.8	111.4	12.87	22.02	14.95
1150680081	transmembrane 9 superfamily member 7-like [Asparagus officinalis]	61.115	15	7	70	6	632	72.6	7.58	195.56	7	1.44	2.039	1.416	0.931663	0.704393	0.627774	26.3	6.55	11.97	67	96.4	136.6	15.62	31.9	21.39
1150679877	asparagine synthetase [glutamine-hydrolyzing] 2 [Asparagus officinalis]	64.769	20	7	49	6	589	66.5	6.6	106	7	0.482	0.518	1.074	0.931663	0.92641	0.973629	0.88	16.16	13.78	148.2	73.2	78.6	3.75	8.3	28.81
1150676300	LOW QUALITY PROTEIN: hexokinase-2-like [Asparagus officinalis]	47.621	22	7	52	3	492	53.4	7.52	136.52	7	0.454	0.261	0.6	0.940913	0.864568	0.671452	6.5	3.99	10.66	172.9	79.5	47.7	11.81	17.98	30.58
1150735741	3-hydroxyisobutyryl-CoA hydrolase-like protein 3, mitochondrial [Asparagus officinalis]	53.243	17	7	98	7	432	47.2	7.2	273.89	7	1.398	1.523	1.102	0.940913	0.875739	0.970691	1.28	4.77	1.75	75.6	102.6	121.8	7.91	8.8	7.18
Q01474	GTP-binding protein SAR1B OS=Arabidopsis thaliana OX=3702 GN=SAR1B PE=1 SV=1	77.323	28	7	156	1	193	22	7.05	419.93	7	1.563	1.58	1.057	0.940913	0.905257	0.988297	8.22	0.51	1.86	69.1	111.5	119.4	15.95	17.68	20.15
1150711197	aspartyl protease AED1-like [Asparagus officinalis]	53.557	17	7	72	7	380	41.4	8.54	170.59	7	1.416	1.192	0.87	0.940913	0.934163	0.916613	4.72	26.78	20.35	81.7	122.3	96	3.71	5.83	19.83
1150709475	proteasome subunit beta type-7-A-like [Asparagus officinalis]	31.29	20	7	71	7	275	29.6	6.98	149.57	7	0.58	0.492	0.915	0.945828	0.893591	0.931296	6.56	18.81	5.11	147.7	79.7	72.7	8.38	7.35	5.52
Q8VYK6	40S ribosomal protein S4-3 OS=Arabidopsis thaliana OX=3702 GN=RPS4D PE=2 SV=2	58.359	24	7	106	2	262	29.8	10.21	249.89	7	0.514	0.35	1.237	0.947558	0.893591	0.916613	65.19	67.05	0.64	152.9	93.6	53.5	11.6	74.38	76.05
1150734901	protein disulfide isomerase-like 2-3 [Asparagus officinalis]	40.674	23	7	44	7	416	45.3	5.38	95.88	7	0.54	0.746	1.381	0.947558	0.985953	0.664845	1.56	7.36	1.58	129.7	69.4	100.8	3.1	3.97	8.72
1150738474	glyceraldehyde-3-phosphate dehydrogenase GAPCP2, chloroplastic-like [Asparagus officinalis]	29.688	21	7	205	3	409	43.5	7.44	350.07	7	0.581	0.382	0.701	0.949282	0.893591	0.81111	6.62	15.47	2.56	149.8	89.4	60.8	11.96	13.88	4.59
1150718031	NADH dehydrogenase [ubiquinone] 1 alpha subcomplex subunit 13-B-like [Asparagus officinalis]	39.88	35	7	63	7	139	15.9	9.89	115.79	7	1.225	1.374	1.092	0.949282	0.893591	0.977475	18.69	13.61	9.95	85.6	93.3	121.1	7.53	16.17	15.38
1150715977	serine carboxypeptidase II-2-like [Asparagus officinalis]	38.964	19	7	35	7	475	52.9	5.22	91.43	7	0.564	0.465	0.825	0.949282	0.901572	0.896581	17.58	32.97	17.47	137.1	85.1	77.8	159.72	24.68	11.77
1150696263	N-alpha-acetyltransferase 15, NatA auxiliary subunit, partial [Asparagus officinalis]	55.963	10	7	61	7	934	106.4	7.58	131.79	7	0.557	0.475	0.859	0.949282	0.905257	0.918093	3.58	4.55	1.22	147.6	82.3	70.1	16.72	19.37	25.85
1150739880	universal stress protein PHOS32-like [Asparagus officinalis]	51.071	42	7	107	5	150	16.2	5.64	270.83	7	1.11	1.27	1.129	0.949282	0.910432	0.955514	4.16	0.09	1.93	87.3	101.7	110.9	12.67	12.81	14.17
1150727491	40S ribosomal protein Sa-2-like [Asparagus officinalis]	82.939	30	7	151	6	312	34.4	6.73	423.39	7	0.597	0.552	0.902	0.949282	0.917884	0.924379	7.26	3.84	11.48	140.3	83.7	75.9	7.26	13.73	12.29
1150696142	LOW QUALITY PROTEIN: WD-40 repeat-containing protein MSI4-like [Asparagus officinalis]	50.727	19	7	61	7	457	50.6	6.13	191.56	7	1.144	1.209	1.057	0.949282	0.919732	0.995088	11.52	1.12	11.73	91.1	99.7	109.3	4.48	13.91	5.03
1150676164	60S ribosomal protein L31 [Asparagus officinalis]	33.248	55	7	72	3	121	13.9	9.99	154.46	7	1.335	1.256	0.973	0.949282	0.92384	0.986947	4.94	19.76	20.21	84.4	109.6	106	8.43	6.76	11.16
1150682163	heat shock cognate 70 kDa protein-like [Asparagus officinalis]	33.029	22	7	78	3	221	24.9	7.15	204.47	7	0.494	1.226	2.395	0.949282	0.949457	0.0852432	5.18	52.63	32.77	109.6	56.1	134.3	31.6	22.17	17.07
1150684925	uncharacterized protein LOC109830672 isoform X1 [Asparagus officinalis]	25.101	26	7	31	7	376	40.4	6.43	32.26	7	0.552	0.654	1.307	0.949282	0.966238	0.916613	12.86	20	25.36	137.5	80.5	82	7.53	14.7	25.96
1150686999	10 kDa chaperonin, mitochondrial-like [Asparagus officinalis]	47.989	77	7	128	3	97	10.4	8.13	350.04	7	1.289	1.045	0.899	0.949282	0.966238	0.922029	0.44	16.19	13.32	100.3	105.1	94.5	13.05	16.11	6.2
A9NUH8	S-adenosylmethionine synthase 1 OS=Picea sitchensis OX=3332 GN=METK1 PE=2 SV=1	73.043	24	7	55	1	393	42.9	5.69	159.68	7	0.597	0.801	1.275	0.949282	0.999557	0.812407	7.46	25.78	40.71	123.5	77.6	98.9	32.27	42.4	90.41
1150743591	nicalin [Asparagus officinalis]	46.306	18	7	79	7	558	61.1	7.93	158.5	7	1.212	1.601	1.148	0.955272	0.905257	0.916613	0.85	5.38	10.1	78.6	105.4	116	9.49	12.84	7.81
1150676027	dynamin-2A-like [Asparagus officinalis]	34.277	8	7	90	1	929	100.8	9.26	162.44	7	1.219	1.393	1.092	0.955272	0.933738	0.98762	15.87	8.62	10.09	78.4	105.9	115.7	22.83	31.74	17.99
1150713544	bifunctional aspartokinase/homoserine dehydrogenase 1, chloroplastic-like isoform X1 [Asparagus officinalis]	23.563	8	7	22	6	946	102.9	6.86	33.7	7	1.102	0.92	0.842	0.955272	0.98003	0.916613	1.34	24.19	25.77	99.3	109.3	91.4	3.62	10.97	48
1150719077	40S ribosomal protein S24-1-like [Asparagus officinalis]	54.558	39	7	99	3	140	15.8	10.74	253.93	7	1.088	1.455	1.075	0.958155	0.87972	0.98762	3.74	32.14	32.98	70.3	100.9	128.7	18.34	36.84	26.17
1150699131	2-Cys peroxiredoxin BAS1, chloroplastic-like [Asparagus officinalis]	68.479	35	7	139	7	268	29.2	6.57	429.09	7	1.17	1.173	0.985	0.958943	0.937183	0.990161	0.17	1.03	3.55	90.4	105.6	104	3.09	6.31	2.56
1150715695	phosphoserine aminotransferase 2, chloroplastic-like [Asparagus officinalis]	51.914	37	7	95	7	189	20.7	8.79	232.64	7	1.159	1.436	1.169	0.959365	0.896774	0.921803	5.27	6.79	8.82	82.8	97	120.2	0.86	6.78	17.47
1150740680	LOW QUALITY PROTEIN: ATP-citrate synthase alpha chain protein 2 [Asparagus officinalis]	43.765	16	7	80	5	416	45.9	5.47	162.64	7	0.667	0.558	0.837	0.959365	0.927861	0.916613	7.34	32.69	22.03	128.5	94.2	77.3	17.37	12.68	14.55
1150678404	40S ribosomal protein S20-1-like [Asparagus officinalis]	38.563	43	7	130	3	121	13.5	9.47	284.8	7	1.092	1.24	1.135	0.959365	0.93361	0.933933	35.72	3.63	16.7	95.3	104.1	100.6	11.62	20.85	10.19
1150727770	uncharacterized protein LOC109849303 isoform X1 [Asparagus officinalis]	41.515	11	7	55	7	617	66.3	6.87	132.57	7	1.058	1.124	0.924	0.959365	0.937183	0.946676	3.02	11.93	0.68	91.4	106	102.7	5.39	8.26	6.34
1150741054	AP-1 complex subunit gamma-2-like [Asparagus officinalis]	39.892	9	7	51	7	897	97.6	6.18	112.93	7	0.619	0.603	1.032	0.959365	0.95889	0.995088	8.69	10.31	9.35	137.4	85.1	77.5	14.36	26.25	32.57
1150719183	ras-related protein RABB1c-like [Asparagus officinalis]	43.744	58	7	42	4	165	17.9	6.54	107.3	7	1.045	0.61	0.713	0.959365	0.962159	0.52726	24.37	1.45	1.27	115.3	115.1	69.6	5.11	21.42	27.3
1150675707	ubiquitin fusion degradation protein 1 homolog [Asparagus officinalis]	58.141	32	7	72	7	316	34.9	6.18	154.98	7	0.626	0.628	1.055	0.959365	0.965327	0.981161	6.08	10.95	22.47	133.5	87.2	79.3	9.68	11.79	26.68
1150670410	3-isopropylmalate dehydrogenase 2, chloroplastic-like [Asparagus officinalis]	34.408	25	7	28	7	404	43.3	6.95	58.8	7	0.662	0.616	1.04	0.959365	0.966238	0.990806	6.58	4.64	13.21	127.6	84.5	87.9	12.52	2.45	9.85
1150704237	poly(U)-specific endoribonuclease-B isoform X1 [Asparagus officinalis]	39.612	24	7	27	7	438	49.8	5.5	57.41	7	1.058	0.965	0.912	0.959365	0.975735	0.932464	8.44	4.85	26.1	96.4	112.4	91.2	12.48	17.85	7.23
1150700013	TOM1-like protein 2 [Asparagus officinalis]	38.519	23	7	56	7	393	44.2	4.79	168.57	7	1.154	0.987	0.863	0.959365	0.98377	0.916613	3.99	12.35	2.82	99	114.2	86.9	21.36	16.45	17.43
1150675564	17.3 kDa class I heat shock protein-like [Asparagus officinalis]	45.192	34	7	107	1	163	18.7	6	228.83	7	1.108	0.533	0.447	0.959365	0.985953	0.32531	11.43	62.87	19.77	134.3	114.5	51.2	24.73	28.3	72.35
1150734677	12-oxophytodienoate reductase 7 [Asparagus officinalis]	41.377	32	7	38	7	391	43.5	8.07	75.27	7	0.667	0.81	1.27	0.959365	0.990282	0.869657	9.35	2.34	0.84	115.4	81.3	103.3	14.39	22.72	25
1150739204	proliferating cell nuclear antigen-like [Asparagus officinalis]	35.58	41	7	74	5	264	29.3	4.72	119.5	7	1.107	1.033	0.936	0.962889	0.966238	0.958103	11.64	18.27	0.39	97.1	102.9	100	8.36	4.77	5.21
1150744835	annexin D3-like [Asparagus officinalis]	18.823	22	7	18	7	321	36.2	5.6	11.11	7	1.197	1.808	1.51	0.963282	0.893591	0.45394	9.04	5.47	21.14	76.6	97.3	126	16.31	30.08	15.25
1150687774	cathepsin B-like [Asparagus officinalis]	60.294	22	7	92	7	359	39.9	6.34	174.77	7	1.085	1.314	1.425	0.965972	0.910432	0.607556	2.85	15.83	22.29	88.3	95.7	116	5.57	10.69	23.62
1150726786	phosphomannomutase [Asparagus officinalis]	59.58	46	7	65	5	247	27.9	6.09	179.53	7	1.009	1.261	1.282	0.967259	0.912644	0.836712	3.91	17.19	7.47	101.2	87.1	111.7	18.18	14.75	21.71
O82663	Succinate dehydrogenase [ubiquinone] flavoprotein subunit 1, mitochondrial OS=Arabidopsis thaliana OX=3702 GN=SDH1-1 PE=1 SV=1	99.054	21	7	101	1	634	69.6	6.29	301.49	7	0.537	0.704	1.718	0.967259	0.999557		23.45	6.59	57.05	122	65.5	112.5	43.52	78.32	37.26
1150676518	DNA-binding protein DDB_G0278111 [Asparagus officinalis]	36.825	51	7	90	7	128	14.7	6.87	190.87	7	0.99	0.863	0.965	0.969429	0.993047	0.989647	12.99	8.53	12.56	111.3	97.8	90.9	11.61	20.89	29.77
1150698272	superoxide dismutase [Cu-Zn], chloroplastic [Asparagus officinalis]	88.205	44	7	86	5	224	22.7	6.33	319.17	7	0.677	0.554	0.733	0.969832	0.934163	0.607556	5.85	17.23	20.48	133.6	90.5	75.8	6.71	40.81	25.38
1150736297	heat shock 70 kDa protein 8 [Asparagus officinalis]	36.709	17	7	49	7	575	62	5.29	99.74	7	0.995	0.818	1.031	0.971252	0.999557	0.99053	9.17	3.21	37.26	109.4	94.3	96.3	10.77	20.51	21.43
1150721847	uncharacterized protein LOC109846732 [Asparagus officinalis]	90.609	24	7	373	7	342	36.8	4.94	1001.95	7	0.757	0.393	0.747	0.975174	0.794318	0.657599	21.46	11.4	18.27	131.3	96.6	72.2	33.54	9.99	41.68
1150704349	LOW QUALITY PROTEIN: AP-4 complex subunit epsilon [Asparagus officinalis]	37.788	4	7	46	7	1706	190	6.7	97.99	7	0.729	0.441	0.652	0.975174	0.901572	0.504802	7.76	18.08	23.84	134.6	100	65.3	13.79	14.99	13.93
Q96452	14-3-3-like protein C OS=Glycine max OX=3847 GN=GF14C PE=2 SV=1	62.132	30	7	151	1	258	29.2	4.78	260.99	7	0.763	0.654	0.858	0.975174	0.961383	0.916613	0.04	64.62	29.51	124.1	94.7	81.2	20.79	31.73	72.15
1150676342	60S ribosomal protein L28-1-like [Asparagus officinalis]	55.487	32	7	142	6	146	16.2	10.55	395.12	7	1.022	0.808	0.819	0.985635	0.996327	0.859906	13.59	9.14	18.06	109	101.2	89.9	6.39	14.52	6.28
1150713539	26S proteasome non-ATPase regulatory subunit 14 homolog [Asparagus officinalis]	37.702	42	7	75	7	308	34.5	6.86	147.7	7	0.699	0.503	0.864	0.985923	0.919199	0.916613	7.11	8.1	11.06	140.9	91.8	67.3	6.46	17.19	26.31
1150732531	GTP-binding protein YPTM2 [Asparagus officinalis]	44.101	52	7	64	2	203	22.7	6.2	167.38	7	0.604	0.38	0.629	0.986803	0.930055	0.796058	13.46	48.57	31.07	151.3	91.3	57.4	27.36	15.71	12.1
1150749708	ALG-2 interacting protein X [Asparagus officinalis]	27.98	9	7	24	7	855	95.4	6.47	47.08	7	0.752	0.824	1.108	0.987534	0.996344	0.954783	21.53	1.78	32.22	112	95.7	92.3	7.59	18.89	15.24
1150677581	60S ribosomal protein L12 [Asparagus officinalis]	58.594	46	7	163	5	166	17.8	8.69	462.48	7	1.01	0.967	0.947	0.989402	0.98003	0.966285	7.14	5.22	29.74	101.2	107.2	91.6	6.86	20.54	8.16
1150681439	B-cell receptor-associated protein 31-like isoform X1 [Asparagus officinalis]	48.739	38	7	61	7	160	18.1	9.07	159.82	7	1.003	0.425	0.515	0.991268	0.831895	0.0473014	14.18	41.38	5.77	128.3	113.3	58.4	10.36	13.37	36.98
1150678835	mitochondrial dicarboxylate/tricarboxylate transporter DTC [Asparagus officinalis]	62.969	26	7	120	1	298	31.7	9.67	375.9	7	0.619	0.36	0.581	0.991268	0.92641	0.681606	24.64	77.86	2.42	142.8	105.9	51.3	72.31	27.82	36.81
1150736584	3-oxoacyl-[acyl-carrier-protein] reductase 4-like [Asparagus officinalis]	43.759	30	7	74	7	316	33	9.22	199.51	7	0.726	0.699	0.98	0.991268	0.983298	0.990264	10.92	45.86	14.79	125.9	91.4	82.8	7.19	11.92	30.79
1150690316	40S ribosomal protein S15-like isoform X2 [Asparagus officinalis]	86.224	53	7	174	3	143	16.3	10.37	485.6	7	0.973	1.016	1.365	0.991757	0.973189	0.718511	14.66	4.09	5.94	105.1	84.1	110.9	12.11	19.19	32.32
1150703705	LOW QUALITY PROTEIN: protein transport protein SEC23-like [Asparagus officinalis]	44.448	15	7	32	3	757	83.2	5.69	61.36	7	0.648	1.003	1.672	0.991757	0.978921	0.753392	15.96	19.67	9.38	110.9	77.9	111.3	14.21	27.15	27.32
1150715038	zinc finger CCCH domain-containing protein 14-like [Asparagus officinalis]	59.049	31	7	55	7	313	32.7	9.23	135.78	7	0.762	0.49	0.671	0.993913	0.910432	0.394135	20.72	0.36	6.27	136.9	96.2	66.9	14.99	12.93	5.38
1150684115	soluble inorganic pyrophosphatase-like [Asparagus officinalis]	48.699	40	7	89	2	220	24.9	6.3	238.41	7	0.799	0.404	0.599	0.993913	0.910432	0.571897	8.92	30.55	16.51	149.7	89.8	60.5	35.83	43.27	64.77
1150682802	histone H2B.11-like [Asparagus officinalis]	60.928	47	7	178	3	153	16.7	10.02	416.31	7	0.958	0.539	0.606	0.993913	0.934163	0.352294	11.28	36.47	0.6	111.1	117.5	71.5	40.23	30.21	13.6
1150709408	glycerophosphodiester phosphodiesterase GDPDL3-like [Asparagus officinalis]	40.726	11	7	58	7	756	82.5	5.8	130.48	7	0.84	0.595	0.759	0.993913	0.934163	0.686748	9.85	10.06	17.02	117	104.1	79	12.35	5.15	8.45
1150733323	vesicle-associated protein 1-1-like [Asparagus officinalis]	27.568	29	7	59	6	237	25.9	6.27	72.22	7	0.945	1.09	1.029	0.993913	0.977122	0.995088	5.09	9.36	2.5	97.6	99.7	102.6	14.72	16.17	6.3
1150701685	LOW QUALITY PROTEIN: synaptotagmin-2-like [Asparagus officinalis]	61.877	17	7	79	7	539	61.4	7.36	158.84	7	0.88	0.973	1.106	0.993913	0.98003	0.948133	33.69	12.66	1.94	103.7	91.3	105	8.74	16.32	11.46
1150724127	LOW QUALITY PROTEIN: acetate/butyrate--CoA ligase AAE7, peroxisomal-like [Asparagus officinalis]	29.271	13	7	62	7	566	62	8.32	112.38	7	0.869	0.885	0.957	0.993913	0.983932	0.9694	2.34	9.46	4.01	100.5	102.3	97.2	11.7	13.73	8.84
1150672621	ras-related protein RIC2-like [Asparagus officinalis]	30.896	36	7	75	1	217	24	5.15	166.2	7	0.641	0.568	0.886	0.993913	0.986	0.978174	23.42	49.97	22.93	135.8	87	77.1	16.65	42.38	83.14
1150733557	stomatin-like protein 2, mitochondrial [Asparagus officinalis]	68.747	33	7	81	7	386	41.6	5.35	224.22	7	0.855	0.662	0.774	0.994359	0.974473	0.771617	7.87	1.82	10.24	119.5	102.4	78.1	10.37	21.69	7.64
1150726571	dolichyl-diphosphooligosaccharide--protein glycosyltransferase subunit 1B [Asparagus officinalis]	33.733	17	7	46	6	474	53	7.93	85.14	7	0.865	0.798	0.956	0.994359	0.999557	0.990161	5.42	1.89	7.37	109.7	97.3	93	5.05	27.64	33.18
1150721026	187-kDa microtubule-associated protein AIR9 [Asparagus officinalis]	35.644	7	7	35	7	1603	176.1	6.49	79.87	7	0.855	1.179	1.352	0.996275	0.963369	0.771617	9.27	11.39	13.19	101.3	88.4	110.3	6.31	4.9	40.46
1150727790	ubiquitin receptor RAD23d-like [Asparagus officinalis]	34.734	20	7	42	6	386	41.3	4.78	86.03	7	0.84	0.676	0.805	0.996275	0.973449	0.896581	8.28	22.35	13.33	123.4	98.2	78.4	5.6	16.61	44.03
1150676274	40S ribosomal protein S24-1-like [Asparagus officinalis]	52.389	39	7	80	2	139	15.7	10.73	200.25	7	0.823	0.654	0.795	0.996275	0.983932	0.916613	32.69	32.9	0.27	121.1	99.7	79.2	27.1	76.61	50.74
1150737680	peroxidase 50-like, partial [Asparagus officinalis]	44.922	26	7	48	7	317	35.1	9.63	113.6	7	0.844	0.396	0.475	0.996716	0.864568	0.0141733	10.7	37.25	8.1	132.9	114.5	52.6	21.05	6.03	13.42
1150734939	DEAD-box ATP-dependent RNA helicase 38-like [Asparagus officinalis]	36.971	18	7	47	1	468	52.1	5.97	115.88	7	0.786	0.866	1.141	0.996716	0.98003	0.961683	1.4	18.18	21.91	113.3	89.9	96.8	9.71	10.79	43.81
1150692998	14-3-3 protein 7-like [Asparagus officinalis]	28.224	29	7	82	2	255	28.9	5.07	102.74	7	0.769	0.582	0.731	0.996716	0.982884	0.916613	4.94	4.76	28.41	130.6	97.8	71.6	7.72	2.72	24.12
1150680798	LOW QUALITY PROTEIN: 1-deoxy-D-xylulose 5-phosphate reductoisomerase, chloroplastic [Asparagus officinalis]	46.122	25	7	45	7	469	51	7.31	111.16	7	0.893	0.786	0.881	0.996716	0.983932	0.94475	22.66	12.82	7.81	114.5	102.1	83.4	10.18	20.98	16.95
1150686565	enoyl-[acyl-carrier-protein] reductase [NADH] 1, chloroplastic-like [Asparagus officinalis]	43.79	21	7	73	1	373	39.2	9.1	139	7	0.76	0.83	1.402	0.996716	0.997887	0.916613	6.81	27.55	9.27	122.2	76.1	101.6	20.61	15.9	11.24
1150698791	nucleoside diphosphate kinase 2, chloroplastic [Asparagus officinalis]	45.3	29	7	105	5	224	24.8	9.06	251.25	7	0.843	0.779	0.987	0.996716	0.998584	0.995088	3.51	1.38	11.57	114.7	96.7	88.6	11.07	15.19	32.32
1150684524	succinate dehydrogenase subunit 5, mitochondrial-like [Asparagus officinalis]	57.695	35	7	52	7	245	26.4	7.97	183.37	7	0.906	0.786	0.993	0.997206	0.986255	0.993437	2.39	13.96	4.62	115.4	93.4	91.3	7.46	11.53	7.21
1150716105	60S ribosomal protein L18-2-like [Asparagus officinalis]	67.958	30	7	101	3	307	34.2	11	271.06	7	0.898	0.865	0.81	0.997206	0.994357	0.916613	4.85	11.39	6.48	108.9	97.1	94	5.57	15.99	10.01
1150725076	neutral ceramidase-like [Asparagus officinalis]	44.644	10	7	45	7	787	87	7.21	86.87	7	0.819	0.675	0.825	0.997415	0.98003	0.876701	13.67	28.47	15.78	109.4	99.1	91.5	14.32	16.53	25.9
1150677320	UDP-sugar pyrophosphorylase isoform X1 [Asparagus officinalis]	35.757	13	7	59	7	653	71.6	6.89	112.37	7	0.816	0.949	1.163	0.998788	0.976046	0.918093	3.58	12.37	2.23	107.9	88.8	103.3	5.97	9.84	28.72
1150736010	nascent polypeptide-associated complex subunit alpha-like protein 1 [Asparagus officinalis]	117.325	58	8	195	1	200	21.8	4.54	615.03	8	0.023	0.01	0.164	2.71435e-07	2.75958e-15	0.000287756	60.06	0	96.57	292.5	6.2	1.2	10.71	99.98	43.35
1150718881	NAD(P)H dehydrogenase (quinone) FQR1-like [Asparagus officinalis]	93.087	54	8	125	4	203	21.5	6.54	375.23	8	0.1	0.033	0.301	0.00291506	4.07108e-06	0.00649176	6.37	12.28	24.38	264.7	26.5	8.8	35.37	51.49	31.14
1150672504	eukaryotic translation initiation factor 5A-2-like [Asparagus officinalis]	73.417	50	8	89	2	160	17.5	5.99	209.02	8	0.097	0.087	1.002	0.0353545	0.0952723	0.99536	17.46	62.43	54.93	255.8	24.9	19.3	18.09	49	95.26
1150724379	probable aquaporin PIP1-2 [Asparagus officinalis]	84.637	37	8	113	6	286	30.6	8.4	312.84	8	0.192	0.164	0.963	0.0844873	0.107132	0.986194	18.9	59.25	33.11	229.3	43.9	26.8	22.58	42.75	70.92
1150741417	60S ribosomal protein L18-3 [Asparagus officinalis]	88.523	49	8	151	5	187	20.9	11.08	384.88	8	0.235	0.247	1.076	0.189147	0.378535	0.966285	3.27	80.52	70.04	204.6	53.2	42.1	14.16	24.82	71.13
1150680865	LOW QUALITY PROTEIN: ATP synthase subunit O, mitochondrial [Asparagus officinalis]	53.885	34	8	54	8	242	26.9	9.23	157.24	8	0.254	0.202	0.955	0.229796	0.247254	0.990161	12.18	46.94	16.1	206	52.3	41.7	3.37	25.46	30.83
P37399	ATP synthase subunit beta, mitochondrial OS=Daucus carota OX=4039 GN=ATPB PE=3 SV=1	80.429	22	8	192	1	547	59.1	5.85	499.13	8	0.257	0.131	0.582	0.245825	0.0402676	0.134835	60.68	14.52	38.01	216.1	53.6	30.3	5.43	46.35	43.4
1150696315	ribosome-inactivating protein charybdin-like [Asparagus officinalis]	40.742	14	8	100	1	451	50.9	7.77	266.68	8	0.138	0.035	0.225	0.266376	0.0872959	0.0051738	72.96	17.18	113.33	250.8	34.5	14.7	49.37	108.91	34.46
1150681512	18.1 kDa class I heat shock protein-like [Asparagus officinalis]	67.334	40	8	128	1	163	18.5	7.5	287.83	8	0.125	0.097	0.426	0.29259	0.493702	0.399335	62.77	14.35	3.6	248.8	27.1	24.1	15.12	47.73	45.78
P93306	NADH dehydrogenase [ubiquinone] iron-sulfur protein 2 OS=Arabidopsis thaliana OX=3702 GN=NAD7 PE=1 SV=2	61.734	31	8	53	8	394	44.9	7.12	117.76	8	0.262	0.174	0.759	0.370131	0.196914	0.859906	4.99	41.13	52.19	207.9	56.5	35.6	4.66	11.52	43.9
1150735241	uncharacterized protein At2g37660, chloroplastic-like isoform X2 [Asparagus officinalis]	48.806	36	8	57	8	255	27.6	7.33	123.02	8	2.631	3.058	1.162	0.402918	0.329027	0.924379	3.39	25.34	4.56	46.1	112.8	141.1	15.2	9.92	7.68
1150736575	proteasome subunit alpha type-2-A [Asparagus officinalis]	79.735	48	8	87	8	235	25.6	5.48	244.26	8	0.315	0.161	0.532	0.442112	0.100447	0.0451182	6.22	1.69	53.48	198.7	69.7	31.6	11.13	20.11	48.81
1150701364	proteasome subunit beta type-5-B-like [Asparagus officinalis]	57.598	48	8	52	3	272	29.2	7.09	141.5	8	0.188	0.379	1.132	0.489088	0.919199	0.960679	74.76	17.16	2.03	186.8	42.5	70.7	11.81	56.99	24.98
1150733054	LOW QUALITY PROTEIN: V-type proton ATPase subunit C-like [Asparagus officinalis]	31.05	21	8	62	2	374	42.3	5.53	138.46	8	3.13	4.283	1.088	0.497905	0.674442	0.974546	47.39	30.2	37.37	31.3	128.7	140	23.12	33.78	51.66
1150728531	proteasome subunit beta type-4 [Asparagus officinalis]	75.211	57	8	63	8	241	27	7.49	148.86	8	0.327	0.255	0.762	0.500618	0.409364	0.723117	22.73	12.17	15.17	197.2	58.2	44.6	12.66	20.41	7.16
1150702878	hydroxymethylglutaryl-CoA synthase-like [Asparagus officinalis]	75.943	32	8	58	8	424	47.4	7.52	174.11	8	2.41	2.844	1.18	0.58624	0.538267	0.916613	5.13	41.14	24.02	49	121.1	129.9	12.84	5.67	29.01
1150726553	spermidine synthase 1 [Asparagus officinalis]	71.098	39	8	82	5	299	33	5.19	243.86	8	0.319	0.213	0.668	0.617069	0.392562	0.596731	32.75	0.03	17.49	195.9	62.4	41.7	15.62	45.82	19.34
P04992	Ribulose bisphosphate carboxylase large chain OS=Petunia hybrida OX=4102 GN=rbcL PE=1 SV=1	55.93	16	8	137	1	477	53	7.05	350.42	8	2.526	5.559	2.473	0.631101	0.196948	0.192873	82.88	64.73	41.26	26.1	65.8	208.1	55.62	106.23	76.89
Q39256	Polyubiquitin 8 OS=Arabidopsis thaliana OX=3702 GN=UBQ8 PE=3 SV=1	105.586	13	8	323	2	631	71.7	9.03	985.56	8	2.8	3.697	1.228	0.638859	0.715693	0.940388	3.25	39.61	31.4	45.4	124.5	130.1	29.8	26.2	46.73
1150672949	aspartic proteinase oryzasin-1-like [Asparagus officinalis]	62.452	23	8	55	5	507	54.7	5.25	100	8	0.319	0.427	1.339	0.642002	0.893591	0.874577	13.87	25.92	14.6	171.8	54.8	73.4	5.77	7.23	49.08
1150716117	LOW QUALITY PROTEIN: proteasome subunit alpha type-1-A-like [Asparagus officinalis]	68.502	37	8	97	6	278	30.2	5.29	273.19	8	0.375	0.299	0.864	0.652885	0.548191	0.916613	13.21	15.76	17	175.4	72.3	52.4	7.45	17.69	23.56
1150736560	bifunctional protein FolD 2 [Asparagus officinalis]	83.09	36	8	111	8	283	30.3	8.72	343.88	8	0.385	0.201	0.775	0.670431	0.215383	0.715129	13.39	48.11	1.68	196.4	64.2	39.5	15.32	21.32	46.75
1150716393	importin subunit beta-1-like [Asparagus officinalis]	62.461	15	8	34	8	871	96.1	4.82	88.36	8	0.381	0.481	1.268	0.675687	0.901572	0.814474	0.59	14.28	13.56	161.2	61.2	77.6	7.64	19.66	30.48
1150715449	ADP,ATP carrier protein 1, mitochondrial [Asparagus officinalis]	65.94	20	8	238	1	380	41.6	9.91	530.08	8	2.269	0.81	0.357	0.690916	0.98003	0.192237	6.83	115.43	122.86	76.1	133.5	90.4	43.26	47.66	104.99
1150700027	proteasome subunit beta type-1 [Asparagus officinalis]	64.106	48	8	55	3	219	23.9	5.94	128.34	8	0.308	0.167	0.596	0.691911	0.520608	0.699273	18.88	27.15	26.69	208.8	56.4	34.8	8.22	19.83	15.3
P49034	Sucrose synthase OS=Alnus glutinosa OX=3517 GN=SUS1 PE=2 SV=1	54.254	10	8	62	2	803	91.6	6.81	126.65	8	0.343	0.414	1.383	0.699213	0.871727	0.705147	11.07	32.98	5.72	175.1	52.4	72.5	19.2	26.39	52.12
1150735704	proteasome subunit alpha type-3-like [Asparagus officinalis]	45.46	24	8	110	8	251	27.5	5.96	208.51	8	0.406	0.308	0.79	0.726916	0.584747	0.786185	6.09	16.14	19.31	178	69.4	52.6	12.31	16.85	5.08
1150700643	isocitrate dehydrogenase [NADP]-like [Asparagus officinalis]	58.184	20	8	72	2	486	54.9	8.53	198.44	8	0.216	1.524	4.484	0.739472	0.905257	0.00644273	33.93	47.06	84.96	109.5	23.7	166.9	15.45	139.99	54.07
1150743062	serine--tRNA ligase [Asparagus officinalis]	57.652	32	8	41	8	355	40.3	6.21	117.95	8	0.374	0.361	1.174	0.753781	0.831895	0.932464	15.02	3.01	18.2	169.1	69.8	61	6.49	18.37	26.41
1150687637	glutamate--tRNA ligase, cytoplasmic-like [Asparagus officinalis]	28.982	10	8	24	1	761	86.1	8.07	36.83	8	2.442	2.736	1.12	0.771126	0.818237	0.988297	1.69	1.77	0.08	49	118.4	132.6	25.98	7.13	12.49
1150731934	nucleolin 1 [Asparagus officinalis]	52.191	14	8	62	8	588	61.6	5.62	160.45	8	1.753	1.144	0.752	0.780804	0.942726	0.647062	8.99	39.61	13.36	84	127.7	88.3	18.02	20.18	15.98
1150698495	aldose 1-epimerase [Asparagus officinalis]	50.26	39	8	43	8	339	37	6.46	84.75	8	0.381	0.295	0.775	0.798072	0.721767	0.916613	17.65	42.15	18.34	188.3	64.1	47.6	10.46	23.68	38.5
1150677217	peptidyl-prolyl cis-trans isomerase CYP19-3-like isoform X2 [Asparagus officinalis]	69.119	48	8	129	7	174	18.8	8.07	325.39	8	1.689	2.199	1.115	0.81391	0.634641	0.960679	0.91	19.23	6.11	61.1	104.4	134.5	1.58	9.36	14.53
1150687521	dnaJ protein ERDJ3B-like [Asparagus officinalis]	43.044	23	8	76	4	345	39.1	6.92	129.23	8	1.912	2.742	1.445	0.845495	0.794318	0.777024	26.39	27.67	1.08	49.2	91.5	159.4	27.97	13.57	14.31
1150690249	pyruvate kinase isozyme A, chloroplastic [Asparagus officinalis]	41.473	27	8	48	8	449	49.8	5.34	92.8	8	0.404	0.49	1.162	0.84894	0.919359	0.962595	2.07	17.25	27.13	157.1	62.5	80.4	9.05	11.74	18.4
1150717350	40S ribosomal protein S11-like [Asparagus officinalis]	42.803	47	8	148	1	160	18.2	10.58	302.98	8	1.696	1.833	1.045	0.852226	0.794318	0.995088	5.12	21.98	1.73	67.3	114.5	118.2	25.32	22.48	4.24
1150707110	sucrose synthase 2-like [Asparagus officinalis]	50.799	60	8	97	7	202	22.9	6.8	245.12	8	0.476	0.199	0.47	0.859117	0.209153	0.0155458	18.37	8.22	21.89	184.9	78.3	36.8	19.53	11.33	7.09
1150681237	actin-interacting protein 1-2-like [Asparagus officinalis]	33.97	27	8	20	8	498	53.6	6.27	22.76	8	0.436	0.513	1.116	0.872815	0.919199	0.965589	7.8	1.14	9.3	153.3	69.3	77.4	19.77	21.58	27.85
1150692231	eukaryotic peptide chain release factor subunit 1-3-like [Asparagus officinalis]	58.157	19	8	102	5	437	49	5.6	268.63	8	1.539	1.756	1.108	0.876807	0.794318	0.9694	4.11	4.22	9.05	70.7	108.8	120.5	17.22	11.56	19.61
1150676799	DEAD-box ATP-dependent RNA helicase 38-like [Asparagus officinalis]	43.73	22	8	51	2	503	55.4	5.68	125.33	8	0.3	0.461	1.129	0.876807	0.957023	0.964011	39.47	17.78	56.6	170.5	56.2	73.3	8.33	27.54	56.19
1150711284	uncharacterized protein LOC109841763 [Asparagus officinalis]	52.214	39	8	64	8	272	30.6	6.2	184.95	8	0.455	0.321	0.816	0.880738	0.704393	0.898093	2.71	15.39	23.07	170.7	75.8	53.5	5.63	16.96	46.38
1150698695	LOW QUALITY PROTEIN: protein argonaute 1A-like [Asparagus officinalis]	54.056	10	8	63	3	1144	125.7	9.47	137.88	8	1.715	2.008	1.187	0.892541	0.893591	0.946676	7.51	9.62	13.16	62.8	111.1	126.1	9.68	12.57	10.69
1150718223	fructose-bisphosphate aldolase 3, chloroplastic [Asparagus officinalis]	46.348	30	8	84	2	370	40.3	8.51	169.7	8	1.842	2.318	1.421	0.894473	0.794318	0.589201	28.89	2.85	19.49	57.7	106.3	136	9.72	13.15	8.22
1150714700	indole-3-glycerol phosphate synthase, chloroplastic-like [Asparagus officinalis]	41.249	20	8	32	8	382	42.3	8.57	63.15	8	0.453	0.757	1.671	0.895003	0.990905	0.281406	43.76	58.03	23.44	130.1	67	102.9	40.05	11.48	15.35
1150728016	40S ribosomal protein S18 [Asparagus officinalis]	79.548	43	8	132	8	152	17.6	10.64	352.07	8	1.566	1.513	1.041	0.898822	0.877214	0.995088	4.34	5.09	10.59	73.1	114.6	112.3	2.16	6.63	18.06
1150741480	peroxisomal acyl-coenzyme A oxidase 1-like [Asparagus officinalis]	51.034	14	8	53	8	664	74.1	7.49	115.06	8	1.538	2.715	1.75	0.901207	0.418414	0.187501	1.31	7.42	6.17	55.9	83.8	160.3	12.41	18.01	8.63
1150735339	LOW QUALITY PROTEIN: probable cellulose synthase A catalytic subunit 8 [UDP-forming] [Asparagus officinalis]	38.203	11	8	51	5	1053	117.7	7.39	78.7	8	1.811	2.691	1.486	0.902178	0.74191	0.461951	6.12	12.46	19.02	54.5	98.8	146.7	38.28	44	31.75
1150746809	LOW QUALITY PROTEIN: L-ascorbate oxidase homolog [Asparagus officinalis]	85.577	23	8	148	6	524	58.4	8.57	415.31	8	1.528	1.317	0.887	0.912974	0.910432	0.916613	2.79	5.52	13.22	75.7	117.9	106.3	4.96	3.53	10.16
1150734248	dnaJ protein ERDJ3B-like [Asparagus officinalis]	50.656	25	8	96	4	346	39.2	7.31	201.67	8	1.79	2.146	1.06	0.917842	0.817316	0.984408	4.4	25.88	9.81	63	112.8	124.2	5.9	23.87	21.2
1150729046	2,3-bisphosphoglycerate-independent phosphoglycerate mutase-like isoform X1 [Asparagus officinalis]	93.94	20	8	171	1	559	61.2	6.44	638.12	8	1.698	2.034	0.885	0.919146	0.829575	0.980672	98.17	33.89	121.82	78.9	143.7	77.5	37.75	82.06	69.37
1150725899	peroxisomal (S)-2-hydroxy-acid oxidase GLO1 isoform X1 [Asparagus officinalis]	38.716	28	8	103	1	367	40.4	9	231.75	8	1.516	1.079	0.691	0.921519	0.98003	0.45394	3.78	7.97	2.76	85.8	126.7	87.5	24.36	22.02	28.57
1150677848	argininosuccinate synthase, chloroplastic-like isoform X1 [Asparagus officinalis]	44.107	15	8	65	1	503	55.3	7.23	161.48	8	0.327	0.221	0.875	0.924734	0.875739	0.972144	99.44	13.22	41.67	194.6	63.6	41.8	2.59	88.25	18.34
1150699230	LOW QUALITY PROTEIN: membrane steroid-binding protein 2-like [Asparagus officinalis]	70.899	53	8	107	5	230	25.2	5.07	251.3	8	0.519	0.471	0.937	0.924734	0.893591	0.968424	9.54	4.36	5.03	154.2	75.3	70.5	16.71	32.34	56.3
1150709069	LOW QUALITY PROTEIN: NADH dehydrogenase [ubiquinone] iron-sulfur protein 7, mitochondrial [Asparagus officinalis]	34.355	38	8	73	8	210	23.1	9.41	128.46	8	0.517	0.626	1.116	0.925683	0.960745	0.953876	3.03	28.5	15.64	138.5	74.8	86.7	4.47	14.36	22.02
1150692551	cytochrome b-c1 complex subunit 7-2 [Asparagus officinalis]	80.859	55	8	80	7	124	14.6	9.74	232.26	8	0.491	0.344	0.815	0.926996	0.756937	0.863256	21.81	32.23	24.14	167.4	78	54.6	8.09	20.16	49.41
1150724219	LOW QUALITY PROTEIN: FT-interacting protein 1-like [Asparagus officinalis]	45.374	12	8	29	8	995	113.8	9.16	61.22	8	0.48	0.506	1.069	0.931663	0.92641	0.984408	31.96	7.47	8.93	145.4	69.8	84.8	8.47	26.18	14.88
1150684807	pyruvate dehydrogenase E1 component subunit beta-1, mitochondrial [Asparagus officinalis]	61.9	28	8	111	4	378	40.6	5.49	309.56	8	1.376	1.246	0.907	0.934254	0.919199	0.92611	8.87	0.31	9.19	81.9	116.2	102	17.29	3.57	14.2
1150677408	LOW QUALITY PROTEIN: heterogeneous nuclear ribonucleoprotein 1-like [Asparagus officinalis]	77.839	28	8	117	8	466	47.8	8.98	271.69	8	1.393	1.135	0.815	0.940913	0.943745	0.84721	7.21	30.77	5.92	88.5	124.7	86.7	10.48	14.65	26.37
Q9FFR3	6-phosphogluconate dehydrogenase, decarboxylating 3, chloroplastic OS=Arabidopsis thaliana OX=3702 GN=PGD3 PE=1 SV=1	44.386	22	8	69	3	487	53.3	5.8	157.13	8	0.34	0.54	1.588	0.940913	0.98003	0.800028	49.66	11.4	66.14	149.8	62.6	87.6	30.92	37.22	58.55
1150735636	20 kDa chaperonin, chloroplastic [Asparagus officinalis]	96.884	55	8	131	2	255	26.7	8.6	409.67	8	0.482	0.657	0.773	0.940913	0.98003		79.09	26.34	64.14	133.7	84.4	81.8	151.99	24.36	44.86
1150689653	chorismate synthase, chloroplastic-like [Asparagus officinalis]	42.268	23	8	43	8	440	47.5	8.43	52.81	8	0.516	0.807	1.576	0.940913	0.999557	0.376191	18.95	3.87	4.94	121	70.9	108.1	8.69	23.6	9.15
1150732156	BAG family molecular chaperone regulator 7 [Asparagus officinalis]	45.737	25	8	39	8	368	42.3	9.07	95.82	8	0.525	0.358	0.683	0.941195	0.799919	0.486922	0.26	0.43	12.35	159.9	83.2	56.8	5.33	0.76	8.29
1150737372	probable 2-oxoglutarate-dependent dioxygenase AOP1.2 [Asparagus officinalis]	39.976	37	8	83	5	283	31.4	4.94	177.37	8	1.417	2.644	1.618	0.948496	0.623267	0.250305	24.43	11	22.72	75.1	95.5	129.4	28.12	14.13	33.5
1150694767	glucan endo-1,3-beta-glucosidase 7-like [Asparagus officinalis]	68.183	31	8	65	6	366	39.5	4.7	177.83	8	1.443	1.438	1.119	0.948496	0.929358	0.946676	11.96	8.93	3.03	80.6	103.5	115.9	30.96	38.67	46.24
1150676323	ATP-dependent 6-phosphofructokinase 6-like [Asparagus officinalis]	64.056	19	8	101	1	506	55.2	6.86	250.49	8	0.357	0.862	2.414	0.948496	0.982884	0.24743	25.11	17.86	38.35	135.3	48.2	116.5	24.86	22.61	38.93
1150683779	cullin-associated NEDD8-dissociated protein 1 isoform X3 [Asparagus officinalis]	40.222	9	8	24	8	1220	134.7	6.14	37.95	8	0.575	0.3	0.396	0.949282	0.794318	0.0693182	0.71	48.2	40.79	162.7	98.8	38.5	14.92	15.6	66.15
1150683658	uncharacterized protein LOC109830217 [Asparagus officinalis]	56.726	42	8	78	7	316	35.8	5.25	178.9	8	0.542	0.431	0.794	0.949282	0.890655	0.812407	0.52	16.98	17.55	156.2	83.5	60.3	10.74	9.7	20.65
1150679951	LOW QUALITY PROTEIN: nucleosome assembly protein 1;4-like [Asparagus officinalis]	83.869	24	8	159	5	381	43.3	4.45	420.66	8	0.649	0.52	0.801	0.949282	0.910432	0.834353	1.47	34.52	23.07	161.5	78.6	59.9	20.68	24.45	45.57
1150728030	uncharacterized protein At3g03773-like [Asparagus officinalis]	62.533	46	8	65	8	182	20.7	4.72	119.21	8	1.159	1.252	1.064	0.949282	0.918639	0.990161	8.08	10.28	13.28	87	104	109	5.93	13.96	12.79
1150676465	ketol-acid reductoisomerase, chloroplastic [Asparagus officinalis]	49.94	15	8	84	3	526	57.4	6.48	233.92	8	1.38	1.413	1.024	0.949282	0.924018	0.995088	9.63	5.2	2.84	78.5	109.4	112	7.95	13.6	11.59
1150677314	LOW QUALITY PROTEIN: probable voltage-gated potassium channel subunit beta [Asparagus officinalis]	43.103	28	8	66	8	330	36.7	8.18	145.32	8	0.605	0.6	1.144	0.949282	0.934163	0.946676	0.13	6.39	2.83	142.7	75.2	82.1	12.62	16.74	22.65
1150710575	uncharacterized protein LOC109841376 [Asparagus officinalis]	81.718	59	8	152	8	91	10.4	8.22	388.38	8	0.601	0.599	1.117	0.949282	0.934163	0.960679	17.17	12.77	15.9	137.1	77	86	10.16	11.39	24.67
1150683635	ras-related protein RABA2a-like [Asparagus officinalis]	37.131	43	8	73	4	220	24.2	7.24	180.18	8	0.555	0.559	1.021	0.949282	0.942726	0.995088	2.03	20.5	28.69	140	83.5	76.5	14.47	13.52	41.98
1150726104	ras-related protein RABE1c-like [Asparagus officinalis]	48.389	43	8	88	1	213	23.7	7.83	162.12	8	1.227	1.326	1.39	0.949282	0.944799	0.916613	2.83	11.87	29.01	87.4	96.7	115.9	6.79	14.9	21.65
1150678402	LOW QUALITY PROTEIN: 3-phosphoshikimate 1-carboxyvinyltransferase 2-like [Asparagus officinalis]	65.293	16	8	96	8	519	55	7.64	218.64	8	1.313	1.143	0.87	0.949282	0.949627	0.916613	24.74	0.36	11.88	81.7	107.4	110.9	17.09	17.1	10.57
1150718515	uncharacterized protein LOC109845059 [Asparagus officinalis]	28.998	14	8	47	8	600	65.6	7.42	94.96	8	1.242	1.001	0.797	0.949282	0.966238	0.786185	13.96	5.53	4.13	95.6	112.4	92	11.46	13.36	8.21
1150736100	LOW QUALITY PROTEIN: probable carboxylesterase 2 [Asparagus officinalis]	80.199	30	8	173	8	302	32.9	5.4	486.88	8	0.657	0.724	1.103	0.949282	0.98003	0.970452	3.9	27.94	11.17	117.7	86.7	95.6	6.89	8.8	23.52
1150680759	universal stress protein A-like protein isoform X1 [Asparagus officinalis]	39.811	48	8	101	8	175	20	6.68	220.62	8	1.181	1.405	1.19	0.955272	0.901572	0.916613	18.18	2.08	14.34	85.3	98	116.7	1.97	18.4	6.37
1150680042	serine-threonine kinase receptor-associated protein-like [Asparagus officinalis]	32.545	29	8	69	8	351	38.1	6.14	122.72	8	1.108	0.96	0.943	0.955272	0.973901	0.972144	11.97	10.21	23.7	95.9	112.7	91.4	8.24	14.74	25.18
1150748055	40S ribosomal protein S25-2-like [Asparagus officinalis]	50.721	52	8	103	1	109	12.1	10.59	266.77	8	1.116	0.685	0.582	0.955272	0.995079	0.668938	15.73	9.41	7.78	111.4	124.4	64.1	21.41	10.11	18.39
1150709051	ubiquitin carboxyl-terminal hydrolase 7-like [Asparagus officinalis]	51.66	26	8	89	8	479	54.3	6.3	206.06	8	1.098	1	0.911	0.958155	0.966238	0.925672	5.72	21.13	13.49	106.1	102.3	91.6	11.22	15.27	24.6
O04499	2,3-bisphosphoglycerate-independent phosphoglycerate mutase 1 OS=Arabidopsis thaliana OX=3702 GN=PGM1 PE=2 SV=3	78.689	17	8	154	1	557	60.5	5.53	411.92	8	0.472	0.474	0.949	0.958943	0.98003	0.995088	8	30.69	21.03	174.7	56.7	68.6	31.58	43.1	85.61
1150684240	monodehydroascorbate reductase-like [Asparagus officinalis]	69.037	25	8	209	3	435	46.8	5.57	620.96	8	0.497	0.352	0.834	0.959365	0.919359	0.955142	26.46	4.41	31.66	162.9	77.5	59.6	4.16	22.9	52.91
1150710840	protein transport protein SEC31 homolog B-like [Asparagus officinalis]	50.325	8	8	52	5	1027	112.8	6.3	79.87	8	1.222	1.339	1.033	0.959365	0.934163	0.990806	7.46	16.9	27.9	83.6	102.2	114.2	6.15	11.5	16.08
1150739877	glycine dehydrogenase (decarboxylating), mitochondrial [Asparagus officinalis]	57.256	11	8	94	8	920	99.8	6.44	193.1	8	0.672	0.585	0.925	0.959365	0.937183	0.957798	12.89	2.91	9.31	124.1	91.4	84.5	10.52	17.27	11.41
1150734278	putative cytochrome c oxidase subunit 5b-like [Asparagus officinalis]	74.458	32	8	103	2	162	18.2	5.74	372.57	8	1.154	1.111	1.154	0.959365	0.962593	0.948133	0.79	5.83	18.87	94.7	100.2	105.2	6.55	15.16	5.64
1150676315	RGG repeats nuclear RNA binding protein A-like [Asparagus officinalis]	67.771	32	8	112	5	331	36.1	8.53	280.21	8	1.247	1.12	0.974	0.959365	0.967513	0.995088	11.61	15.8	1.81	89	110.1	100.8	6.62	3.8	9.86
1150735533	LOW QUALITY PROTEIN: cinnamoyl-CoA reductase 1-like [Asparagus officinalis]	42.295	26	8	109	8	324	35.9	6.73	195.98	8	1.125	0.783	0.853	0.959365	0.985953	0.916613	3.73	4.84	38.54	93.6	105.3	101.1	20.68	7.38	27.6
1150733644	malate dehydrogenase, chloroplastic-like [Asparagus officinalis]	49.532	29	8	64	6	412	43.1	8.32	180.56	8	0.647	0.801	1.262	0.959365	0.999557	0.807088	3.36	9.73	0.49	108.9	84.5	106.6	18.49	15.28	11.84
1150714932	phytepsin-like isoform X1 [Asparagus officinalis]	88.676	23	8	133	4	510	54.7	5.76	301.37	8	1.084	0.776	0.93	0.960709	0.994357	0.948067	3.31	35.88	2.37	112.8	98.3	88.8	12.51	15.3	20.14
1150693815	brefeldin A-inhibited guanine nucleotide-exchange protein 5 isoform X1 [Asparagus officinalis]	42.115	7	8	41	8	1823	201.4	5.57	64.86	8	0.703	0.575	0.887	0.963088	0.954542	0.969753	12.23	27.97	33.32	132.9	90.8	76.4	27.24	26.82	54.45
1150696560	cytochrome c oxidase subunit 5b-1, mitochondrial-like [Asparagus officinalis]	79.717	33	8	103	2	156	17.5	5.41	369.28	8	1.141	1.267	1.11	0.964132	0.950938	0.957149	16.74	19	2.55	88	100.5	111.5	14.74	6.33	10.65
1150677926	60S ribosomal protein L23A [Asparagus officinalis]	79.508	41	8	186	8	155	17.4	10.32	513.88	8	1.096	0.89	0.852	0.964132	0.991106	0.916613	12.26	6.9	9.5	98.8	117.2	84	20.09	12.88	31.75
1150722656	transketolase, chloroplastic-like [Asparagus officinalis]	47.255	16	8	74	3	633	69.1	5.88	183.95	8	0.652	0.786	1.205	0.964316	0.999557	0.932464	4.06	6.3	2.34	123	80.2	96.7	8.77	18.29	57.05
1150726860	S-formylglutathione hydrolase-like isoform X1 [Asparagus officinalis]	61.6	30	8	128	8	284	31.8	7.47	360.26	8	1.085	0.963	0.941	0.965972	0.98003	0.960679	0.61	1.86	8.74	101.9	101.1	97	6.84	11.12	10.06
1150718129	ras-related protein RABA1f-like [Asparagus officinalis]	48.537	42	8	80	2	216	24.1	6.15	209.33	8	1.088	1.066	0.959	0.965972	0.98003	0.989647	3.11	2.23	5.19	107	112.2	80.8	29.38	30.9	37.52
1150732534	monocopper oxidase-like protein SKU5 [Asparagus officinalis]	41.046	18	8	70	8	594	65.8	7.52	155.35	8	1.009	0.88	0.909	0.967259	0.983932	0.924157	3.27	6.98	1.32	105.2	102.3	92.5	4.78	4.49	1.18
1150732345	LOW QUALITY PROTEIN: DEAD-box ATP-dependent RNA helicase 37-like [Asparagus officinalis]	39.679	14	8	51	8	578	62.6	6.38	113.69	8	0.668	0.468	0.745	0.968851	0.905257	0.668938	2.17	20.11	9.4	140.5	93.8	65.7	5.02	17.6	20.95
1150719117	LOW QUALITY PROTEIN: ubiquitin carboxyl-terminal hydrolase 14-like [Asparagus officinalis]	44.15	19	8	36	8	801	89.1	5.16	61.12	8	1.051	1	0.916	0.973541	0.983932	0.955876	13.62	5.64	1.72	100.4	102.3	97.3	3.23	10.2	9.47
1150702371	fasciclin-like arabinogalactan protein 8 [Asparagus officinalis]	118.041	70	8	99	8	127	13.4	5.2	347.23	8	0.756	0.532	0.601	0.974793	0.908881	0.192237	4.47	7.84	1.7	131.1	104.5	64.3	8.1	4.39	15.61
1150739747	caffeic acid 3-O-methyltransferase-like isoform X1 [Asparagus officinalis]	70.767	28	8	122	2	363	39.7	5.19	311.87	8	1.034	0.255	0.729	0.975174	0.818237	0.918093	120.58	133.94	71.47	118.9	106.2	74.9	143.72	9.78	70.9
1150712749	probable NADH dehydrogenase [ubiquinone] 1 alpha subcomplex subunit 5, mitochondrial [Asparagus officinalis]	81.729	54	8	97	8	170	19.3	4.91	227.12	8	0.76	0.727	0.956	0.975174	0.98003	0.972144	0.74	11.39	10.61	118.1	96	85.9	5.21	8.02	15.36
1150730748	protein TIC110, chloroplastic isoform X1 [Asparagus officinalis]	34.763	13	8	38	8	800	89.6	5.52	52.71	8	1.092	0.953	0.92	0.975174	0.983932	0.9694	3.24	13	2.62	101.2	106.1	92.7	7.66	7.19	8.8
1150710719	60S ribosomal protein L13-1-like [Asparagus officinalis]	91.368	37	8	180	3	207	24	10.81	528.17	8	1.034	1.307	1.263	0.97627	0.910432	0.879531	0.13	1.63	1.76	91.9	92	116.1	14.38	18.68	25.12
1150727038	glucosidase 2 subunit beta [Asparagus officinalis]	49.54	17	8	77	8	655	74.4	4.87	155.6	8	1.02	0.992	1.048	0.978863	0.967767	0.995088	2.68	16.12	24.25	99.3	102.2	98.5	0.48	5.06	20.03
1150727760	NADH dehydrogenase [ubiquinone] 1 alpha subcomplex subunit 6 [Asparagus officinalis]	45.608	64	8	95	8	128	14.6	9.42	143	8	0.774	0.755	1.045	0.979602	0.98377	0.995088	5.22	0.09	5.47	119.7	88.2	92.1	8.38	5.12	12.11
1150716190	prostaglandin reductase-3 [Asparagus officinalis]	50.134	21	8	47	8	632	68.9	8.91	89.11	8	0.751	0.672	1.15	0.986803	0.966238	0.918169	15.54	12.26	20.14	127.6	81.1	91.3	15.34	17.35	34.26
1150701573	60S ribosomal protein L32-1-like [Asparagus officinalis]	124.62	38	8	131	4	199	23.3	10.86	315.56	8	1.006	1.201	1.108	0.987812	0.942726	0.946676	11.81	21.58	7.71	95	90.9	114.1	5.42	11.36	10.65
1150732546	probable LL-diaminopimelate aminotransferase, chloroplastic [Asparagus officinalis]	42.787	22	8	81	8	467	50.7	6.57	141.84	8	0.924	1.239	1.342	0.989903	0.913884	0.705147	0.4	0.26	2.36	91.5	95.1	113.4	10.63	12.07	11.64
1150741315	MICOS complex subunit MIC60 isoform X1 [Asparagus officinalis]	53.685	21	8	58	8	638	69.8	5.24	140.45	8	0.724	0.609	0.868	0.991268	0.962593	0.918138	10.69	5.8	4.71	128.4	93.2	78.4	6.2	16.55	22.33
1150672290	enoyl-[acyl-carrier-protein] reductase [NADH] 1, chloroplastic-like [Asparagus officinalis]	59.352	28	8	99	2	377	39.7	8.47	213.3	8	0.774	0.916	1.236	0.991268	0.993047	0.916613	27.75	11.92	6.27	110.2	86.4	103.4	11.53	14.44	6.89
1150710208	60S ribosomal protein L23 [Asparagus officinalis]	43.484	60	8	112	8	140	15	10.39	229.09	8	0.981	0.54	0.619	0.991757	0.910432	0.236837	17.18	20.07	6.51	119.2	116.4	64.3	3.51	15.31	25.49
1150742517	cytochrome b-c1 complex subunit Rieske-4, mitochondrial-like, partial [Asparagus officinalis]	66.475	31	8	75	5	258	28.1	8.16	203.77	8	0.782	0.505	0.645	0.991757	0.910432	0.281397	1.1	1.39	38.93	130.3	103.1	66.5	3.67	10.52	28.79
1150736540	LOW QUALITY PROTEIN: activator of 90 kDa heat shock protein ATPase homolog [Asparagus officinalis]	59.274	34	8	111	8	334	37.3	5.49	238.09	8	0.801	1.281	1.599	0.991757	0.919199	0.356741	1.01	4.71	3.68	97.3	78	124.7	12.78	17.44	25.31
1150734036	26S proteasome non-ATPase regulatory subunit 11 homolog [Asparagus officinalis]	38.509	22	8	63	1	426	47.5	6.18	148.01	8	0.989	0.944	0.926	0.991757	0.98003	0.982285	4.5	2.85	7.26	119	94	87	14.34	14.15	35.58
1150746950	60S ribosomal protein L13-1-like isoform X2 [Asparagus officinalis]	90.146	37	8	168	3	207	24	10.81	456.32	8	0.993	0.973	0.999	0.991757	0.98003	0.995088	5.88	25.33	2.99	107.8	97.1	95.1	9.34	16.79	25.11
1150699060	40S ribosomal protein S25-2 [Asparagus officinalis]	55.017	52	8	103	1	109	12	10.59	268.87	8	1.003	0.605	0.604	0.993913	0.966238	0.510041	4.02	11	7.28	118.8	119.1	62.1	15.6	13.03	28.7
1150725279	40S ribosomal protein S15 [Asparagus officinalis]	100.697	55	8	213	4	151	17.2	10.51	578.14	8	0.833	1.041	1.304	0.993913	0.966238	0.812407	12.77	24.92	6.02	104.6	86.6	108.9	4.61	19.08	25.76
1150694480	glutathione reductase, chloroplastic [Asparagus officinalis]	52.04	23	8	46	8	550	59.5	7.09	109	8	0.946	0.716	1.061	0.993913	0.98003	0.98247	1.28	28.55	7.99	123.6	88	88.4	16.17	25.46	12.93
1150730866	uncharacterized protein LOC109850596 [Asparagus officinalis]	36.501	70	8	71	5	137	15.1	5.03	115.78	8	0.797	0.775	0.905	0.993913	0.999557	0.972144	28	26.49	32.12	116	94.1	89.9	5.65	17.39	41.93
1150678928	uncharacterized protein LOC109824239 [Asparagus officinalis]	33.868	21	8	99	8	399	43.4	5.77	264.02	8	0.936	1.087	1.334	0.994359	0.961383	0.785869	18.23	33.27	20.85	100.2	86.9	112.9	12.63	11.64	16.62
1150676516	uncharacterized protein LOC109847790 [Asparagus officinalis]	76.895	32	8	86	8	292	33.5	4.84	174.72	8	0.928	0.707	0.814	0.994359	0.98003	0.812407	2.95	17.23	5.36	113.9	105.6	80.5	14.7	24.4	27.33
1150736208	LOW QUALITY PROTEIN: nucleosome assembly protein 1;4-like [Asparagus officinalis]	69.016	33	8	71	6	379	43.1	4.51	174.9	8	0.936	0.813	0.893	0.994359	0.999557	0.918138	8.81	18.26	4.39	118.4	95.9	85.7	11.74	17.83	24.28
1150747588	glutamine--tRNA ligase [Asparagus officinalis]	48.215	12	8	35	8	815	92.9	7.15	69.52	8	0.925	0.833	1.057	0.994359	0.999557	0.984408	4.24	10.2	2.63	109.6	101.6	88.8	1.79	13.82	12.98
1150746278	dynamin-related protein 1E-like [Asparagus officinalis]	43.534	17	8	46	8	616	68.9	7.88	99.32	8	0.801	0.877	1.097	0.996716	0.983932	0.961683	5.82	11.74	5.53	115.1	92.1	92.8	10.82	16.83	16.89
1150750260	far upstream element-binding protein 2-like [Asparagus officinalis]	40.564	15	8	68	8	703	74.1	4.93	112.83	8	0.828	0.795	0.889	0.997414	0.999557	0.924363	5.38	6.83	7.15	116.1	96.5	87.4	4.71	9.28	8.54
1150703582	histidine--tRNA ligase, cytoplasmic-like [Asparagus officinalis]	31.387	11	8	42	4	948	104.7	6.83	81.31	8	0.928	0.858	0.964	0.997789	0.999557	0.990161	0.53	11.2	6.39	105.7	98.4	95.9	9.33	15.32	18.73
1150744702	copper transport protein ATX1-like isoform X1 [Asparagus officinalis]	83.581	85	8	135	8	110	11.3	4.75	444.71	8	0.889	0.603	0.667	0.998724	0.935516	0.387893	2.36	3.37	12.4	125.8	111.8	62.4	50.1	52.73	55.3
1150700609	60S ribosomal protein L7a-1-like [Asparagus officinalis]	63.595	31	9	132	2	258	29.3	10.32	328.78	9	33.36	34.815	1.105	9.82362e-06	0.000206917	0.965589	8.24	33.75	80.97	2.6	121.7	175.7	53.26	36.01	50.41
1150716701	nascent polypeptide-associated complex subunit alpha-like protein 1 [Asparagus officinalis]	134.02	77	9	233	2	200	21.8	4.54	671.55	9	0.072	0.074	0.984	0.000236215	0.00203344	0.99536	1.98	9.35	6.93	262.9	18.7	18.4	5.41	53.17	34.77
1150747454	40S ribosomal protein S17-3-like [Asparagus officinalis]	81.174	42	9	164	2	130	15.3	9.5	439.8	9	0.059	0.068	1.244	0.00370101	0.0383635	0.918093	13.52	52.76	62.69	268.1	15.9	16	9.94	26.67	49.89
1150698783	ATP synthase subunit delta', mitochondrial [Asparagus officinalis]	63.889	99	9	77	4	145	15.2	5.77	189.25	9	0.078	0.047	0.535	0.00414114	0.00245229	0.559416	42.56	25.84	15.4	271.7	17.7	10.6	11.79	45.52	27.28
P08440	Fructose-bisphosphate aldolase, cytoplasmic isozyme OS=Zea mays OX=4577 PE=2 SV=1	62.761	24	9	380	4	355	38.6	7.61	1116.07	9	7.115	7.558	1.062	0.00576738	0.0130262	0.990161	14.75	30.4	17.38	20.7	140.1	139.3	31.76	18.39	8.89
1150699915	subtilisin-like protease SBT3.8 isoform X1 [Asparagus officinalis]	109.441	20	9	93	9	764	82	7.09	257.04	9	0.118	0.066	0.464	0.00817308	0.000925701	0.235224	28.56	4.03	2.93	262.4	25.6	11.9	53.23	11.67	23.93
1150669041	2-dehydro-3-deoxyphosphooctonate aldolase [Asparagus officinalis]	68.818	50	9	102	2	290	31.7	7.71	279.46	9	0.089	0.101	1.138	0.0276408	0.133948	0.957433	1.32	15.07	12.48	252.3	22.3	25.4	14.5	66.44	126.6
1150748888	glutathione S-transferase F10-like [Asparagus officinalis]	65.675	59	9	60	9	228	26.2	6.73	153.28	9	0.168	0.043	0.363	0.0468081	3.70479e-05	0.0194205	9.11	11.32	4.75	259	30.8	10.2	30.99	34.15	11.15
1150713601	mexicain-like [Asparagus officinalis]	56.216	23	9	81	3	349	39.4	8.25	217.38	9	7.326	8.007	1.119	0.0472286	0.103824	0.953735	3.47	2.32	12.96	15.9	116.5	167.6	50.43	53.66	49.09
1150700100	ATP synthase subunit delta', mitochondrial-like, partial [Asparagus officinalis]	48.071	71	9	65	4	214	22.8	7.64	91.98	9	0.205	0.268	1.31	0.106338	0.490066	0.840581	48.33	11.33	3.52	208.1	39.8	52.1	12.01	31.73	11.5
1150679105	proteasome subunit beta type-1-like [Asparagus officinalis]	74.145	58	9	71	4	220	24.1	6.19	152.71	9	0.167	0.163	0.778	0.285446	0.584747	0.948133	23.53	5.64	5.55	231.2	39.1	29.7	15.62	31.08	14.62
1150709021	60S ribosomal protein L6-like [Asparagus officinalis]	100.682	39	9	128	1	233	25.9	10.18	432.19	9	0.126	0.127	0.896	0.304288	0.653193	0.990247	22.44	3.13	6.04	237.4	32.4	30.2	27.22	40.06	42.26
O48549	40S ribosomal protein S6-1 OS=Arabidopsis thaliana OX=3702 GN=RPS6A PE=1 SV=2	85.956	32	9	149	1	250	28.4	10.61	429.7	9	4.918	32.445	2.473	0.356781	0.000994393	0.0148083	3.69	94.05	8.41	7	38.6	254.4	59.7	92.12	61.3
1150699510	acyl-CoA-binding protein [Asparagus officinalis]	60.475	88	9	145	6	90	10.2	5.5	315.79	9	2.604	3.34	1.279	0.41238	0.25446	0.859906	10.12	5.3	4.89	40.9	113.7	145.4	26.54	29.94	22.93
1150716587	proteasome subunit alpha type-6 [Asparagus officinalis]	63.63	35	9	95	8	246	27.1	6.32	181.3	9	0.31	0.229	0.649	0.423117	0.316569	0.331739	12.93	11.6	13.11	197	62	40.9	9.93	21.07	11.25
1150676705	peroxiredoxin-2C-like [Asparagus officinalis]	114.247	66	9	175	9	162	17.4	5.85	464.93	9	0.316	0.447	1.412	0.450683	0.864568	0.635726	1.8	12.06	11.17	171.3	52.1	76.5	9.18	2.58	40.11
1150722714	T-complex protein 1 subunit delta [Asparagus officinalis]	61.42	28	9	75	3	367	40.3	5.96	183.06	9	0.292	0.205	0.705	0.559806	0.373227	0.786185	22.62	48.42	19.25	202.5	53.8	43.6	7.7	30.16	45.68
1150681510	18.1 kDa class I heat shock protein-like [Asparagus officinalis]	91.141	34	9	204	2	163	18.6	5.74	445.68	9	1.902	2.365	1.325	0.698813	0.501607	0.791053	11.34	9.74	19.02	72.8	83.1	144.1	60.65	32.97	32.92
1150746958	trans-resveratrol di-O-methyltransferase-like [Asparagus officinalis]	65.662	30	9	92	8	357	40.1	6.11	219.09	9	1.962	3.209	1.906	0.726916	0.287758	0.09167	21.02	34.54	18.47	50.9	85.7	163.4	19.49	42.81	63.56
1150683619	2-dehydro-3-deoxyphosphooctonate aldolase-like [Asparagus officinalis]	52.026	42	9	103	2	290	31.8	7.71	260.13	9	0.19	1.007	5.303	0.726916	0.977884	0.000832599	45.02	100.71	86.27	137	20	143.1	41.86	19.09	59.26
1150743563	60S ribosomal protein L7a-1-like [Asparagus officinalis]	43.243	35	9	123	2	260	29.6	10.35	242.78	9	0.326	0.096	0.294	0.728377	0.174101	0.0451182	2.03	71.06	72.1	211	68.8	20.2	35.23	46.21	48.64
Q0E4K1	Catalase isozyme A OS=Oryza sativa subsp. japonica OX=39947 GN=CATA PE=1 SV=1	124.352	23	9	290	4	492	56.7	7.01	929.9	9	1.791	2.718	1.904	0.803841	0.417812	0.0918437	9.7	39.58	1.4	54.8	96.2	149	12.32	21.83	18.56
1150700627	dihydrolipoyllysine-residue succinyltransferase component of 2-oxoglutarate dehydrogenase complex 1, mitochondrial-like [Asparagus officinalis]	50.747	23	9	138	2	438	48	9.03	270.21	9	0.377	0.242	0.648	0.803841	0.682378	0.688153	16.96	15.56	0.56	185.2	69.9	44.9	7.12	19.13	19.38
1150668763	glutathione S-transferase 3-like [Asparagus officinalis]	87.552	57	9	112	9	205	22.1	5.38	346.82	9	0.442	0.467	0.941	0.803841	0.875739	0.960679	5.23	23.88	34.09	155.6	66.5	78	30.55	51.09	24.09
1150714906	LOW QUALITY PROTEIN: pyruvate decarboxylase 2-like [Asparagus officinalis]	52.556	16	9	144	4	592	64.9	7.39	380.8	9	0.445	0.385	0.829	0.804137	0.785903	0.892909	6.16	41.11	22.12	162.2	75.3	62.4	21.72	24.38	50.68
1150732984	triosephosphate isomerase, chloroplastic [Asparagus officinalis]	76.678	32	9	105	8	323	34.4	7.66	296.06	9	0.448	0.406	1.008	0.813438	0.807193	0.995088	15.76	13.63	26.13	159.9	76.3	63.8	4.24	11.97	29.24
1150723248	20 kDa chaperonin, chloroplastic-like [Asparagus officinalis]	125.88	45	9	153	3	264	27.9	8.44	453.14	9	1.749	1.849	1.043	0.825417	0.784855	0.995088	7.16	5.08	5.8	63.2	115.9	120.9	6.93	9.7	4.62
1150717011	ras-related protein RIC2 [Asparagus officinalis]	52.125	41	9	94	2	217	23.9	5.73	226.4	9	2.071	2.949	1.292	0.845495	0.676098	0.771617	15.89	8.25	9.02	48.5	108.3	143.2	13.87	12.67	6.39
1150735099	LOW QUALITY PROTEIN: proteasome subunit alpha type-7-like [Asparagus officinalis]	64.089	41	9	50	5	249	27.1	8.62	126.95	9	0.398	0.442	1.111	0.859117	0.910432	0.98762	0.03	22.82	26.94	172.9	68.8	58.3	21.68	16.66	26.9
1150684949	uncharacterized protein LOC109830679 [Asparagus officinalis]	62.899	17	9	41	9	1117	123.9	4.42	71.71	9	0.419	0.342	0.971	0.859152	0.829575	0.995088	59.25	73.32	9.65	155.7	70.8	73.5	94.88	40.19	45.33
1150686966	gamma carbonic anhydrase 1, mitochondrial-like [Asparagus officinalis]	41.073	44	9	44	6	272	29.6	6.54	82.63	9	0.423	0.408	0.983	0.881268	0.893591	0.995088	2.83	23.04	26.31	168.5	71.3	60.2	8.16	15.34	32.13
1150696303	transmembrane 9 superfamily member 7-like [Asparagus officinalis]	76.838	20	9	87	8	634	72.4	7.14	239.66	9	1.491	1.593	1.099	0.884571	0.839602	0.972144	7.52	4.3	11.13	72.6	108.3	119	29.23	46.26	32.23
1150670012	anthranilate synthase alpha subunit 1, chloroplastic-like, partial [Asparagus officinalis]	61.917	23	9	59	9	552	61.9	6.65	89.37	9	0.438	0.442	1.009	0.887105	0.893591	0.998638	4.06	27.73	19.94	154.9	70.1	75	15.96	13.23	13.74
1150683933	isocitrate dehydrogenase [NAD] catalytic subunit 5, mitochondrial-like [Asparagus officinalis]	53.252	34	9	91	1	358	39.1	7.09	223.93	9	0.278	0.513	1.845	0.890219	0.974053		19.36	1.02	18.22	165.7	49.3	85	57.14	4.49	34.15
1150726997	translocase of chloroplast 159, chloroplastic-like [Asparagus officinalis]	52.426	13	9	44	9	1356	146.8	4.69	70.87	9	1.545	1.241	0.867	0.895003	0.931854	0.916613	9.21	9.56	9.55	82.4	122	95.6	13.11	13.77	6.16
1150691688	putative 3,4-dihydroxy-2-butanone kinase isoform X1 [Asparagus officinalis]	68.663	19	9	48	9	596	62.1	5.49	118.64	9	0.446	0.43	0.964	0.900326	0.893591	0.994489	6.25	17.75	8.38	156.2	75.8	68	8.83	13.79	18.59
1150669044	obtusifoliol 14-alpha demethylase [Asparagus officinalis]	44.354	17	9	48	9	488	55.4	8.54	81.01	9	1.446	1.081	0.955	0.900326	0.957023	0.972144	14.62	16.25	25.5	83.7	121	95.4	10.06	14.13	30.82
1150710548	calcium-transporting ATPase 8, plasma membrane-type-like [Asparagus officinalis]	44.582	10	9	43	9	1101	120.7	8.06	53.59	9	0.449	0.506	1.132	0.904473	0.919359	0.94446	4.79	4.14	14.28	150.3	73.6	76.1	6.9	11.24	13.6
1150716604	LOW QUALITY PROTEIN: T-complex protein 1 subunit alpha [Asparagus officinalis]	49.66	19	9	68	9	538	58.5	5.67	132.18	9	0.523	0.475	0.908	0.916553	0.887807	0.930057	0.73	27.01	8.71	154	80.2	65.7	7.85	21.52	30.23
1150709803	cytochrome c1-2, heme protein, mitochondrial isoform X1 [Asparagus officinalis]	135.401	49	9	123	9	305	33.5	7.17	355.46	9	0.526	0.465	0.884	0.917842	0.875739	0.916613	0.02	45.57	45.54	151.7	79.7	68.6	1.67	11.49	44.71
1150712899	60S ribosomal protein L10a-like [Asparagus officinalis]	78.957	37	9	160	2	216	24.5	9.94	374.98	9	0.47	0.277	0.9	0.927557	0.69463	0.955142	36.12	25.88	47.82	174.4	84.5	41.2	15.57	31.9	67.77
1150698939	60S acidic ribosomal protein P2A-like [Asparagus officinalis]	130.345	82	9	181	7	113	11.4	4.41	628.25	9	0.538	0.267	0.438	0.931248	0.434988	0.0060076	17.33	90.68	74.98	164.4	91.8	43.8	3.2	22.83	85.85
1150735433	40S ribosomal protein S11 [Asparagus officinalis]	55.08	48	9	170	2	159	17.8	10.36	386.37	9	1.45	1.441	0.994	0.931663	0.893591	0.994916	9.05	30.09	12.93	77.1	111.8	111.1	23.38	13.51	7.01
1150746552	RNA-binding KH domain-containing protein PEPPER-like [Asparagus officinalis]	56.073	34	9	61	9	415	44.3	6.27	143.87	9	0.482	0.271	0.56	0.937836	0.644471	0.24743	2.21	1.25	0.7	172.3	81	46.7	5.78	6.9	4.83
1150690093	glutamate dehydrogenase 1, mitochondrial [Asparagus officinalis]	90.384	34	9	108	9	411	44.2	6.99	343.08	9	0.56	0.575	1.051	0.940913	0.92641	0.995088	10.19	51.44	3.55	148.9	73.7	77.4	31.61	26.11	48.96
1150725083	V-type proton ATPase subunit D [Asparagus officinalis]	47.828	33	9	71	9	266	29.5	9.55	167.21	9	0.546	0.572	1.074	0.940913	0.934163	0.977475	3.71	16.81	18.35	140.8	78.7	80.5	4.23	7.58	20.53
1150706877	IAA-amino acid hydrolase ILR1-like 1 [Asparagus officinalis]	87.679	22	9	157	7	439	47.6	5.74	429.13	9	0.562	0.613	0.952	0.940913	0.942726	0.971692	3.25	21.65	0.25	137	79.1	84	9.25	14.22	10.42
1150725204	phosphatidylglycerol/phosphatidylinositol transfer protein-like [Asparagus officinalis]	93.04	59	9	262	9	161	17.7	5.87	795.74	9	1.396	1.087	0.935	0.940913	0.961383	0.957611	24.81	4.51	22.51	82	103.7	114.3	21.25	37.27	14.17
1150709025	vacuolar-processing enzyme-like [Asparagus officinalis]	94.238	34	9	94	9	489	53.8	6.28	267.68	9	1.407	0.944	0.688	0.940913	0.983298	0.45394	5.27	1.65	2.73	85.7	129.7	84.6	12.93	5.39	12.22
1150701565	importin beta-like SAD2 [Asparagus officinalis]	58.747	12	9	54	9	1028	117.8	4.97	119.79	9	1.271	1.488	1.054	0.947558	0.875739	0.995088	12.94	6.56	17.69	79.1	111.4	109.4	15.89	12.19	6.51
1150709041	ras-related protein RIC1 [Asparagus officinalis]	58.734	63	9	81	2	202	22.5	5.72	183.31	9	0.461	0.324	0.769	0.948496	0.902302	0.916613	2.5	29.51	18.42	175	73.8	51.2	18.03	17.56	29.03
P46297	40S ribosomal protein S23 OS=Fragaria ananassa OX=3747 GN=RPS23 PE=2 SV=1	76.957	51	9	177	9	142	15.8	10.45	505.75	9	1.35	1.237	0.884	0.948496	0.92641	0.916613	5.53	30.88	0.8	85.1	103.2	111.7	8.28	15.7	17.41
1150683819	probable 26S proteasome non-ATPase regulatory subunit 3 [Asparagus officinalis]	60.3	27	9	61	2	392	45	8.6	141.67	9	0.42	0.419	0.997	0.948801	0.937183	0.995825	34.5	0.05	45.04	167.1	62.8	70	6.53	27.97	19.69
1150736200	probable aldehyde dehydrogenase [Asparagus officinalis]	52.283	21	9	58	6	508	56.6	7.09	117.79	9	0.594	0.432	0.727	0.949282	0.875739	0.575705	3.96	26.81	20.49	143.4	90.6	65.9	7.94	7.42	21.63
1150699563	probable phospholipid hydroperoxide glutathione peroxidase [Asparagus officinalis]	53.453	37	9	115	8	167	18.4	6.19	270.1	9	0.598	0.502	0.839	0.949282	0.901572	0.903815	3.13	23.43	16.02	149.2	87.4	63.4	11.97	14.85	31.12
P42739	Polyubiquitin (Fragment) OS=Acetabularia peniculus OX=35862 PE=3 SV=2	110.059	67	9	577	2	423	47.4	8.13	1644.33	9	0.422	0.298	0.706	0.949282	0.904244	0.916613	70.27	96.26	39.66	131.8	85.8	82.4	56.41	49.7	70.31
1150727233	histone H2B.11-like [Asparagus officinalis]	132.56	43	9	317	3	157	17.2	10.02	978.72	9	1.221	0.582	0.476	0.949282	0.930055	0.0183455	47.48	29.64	24.4	108.5	132.4	59.1	31.83	18.45	4.31
1150684879	lysine--tRNA ligase [Asparagus officinalis]	47.223	18	9	60	9	648	73	6.37	128.49	9	1.218	1.172	0.955	0.949282	0.937183	0.972144	1.1	5.09	8.93	88.6	108.7	102.7	10.18	13.75	6.1
1150714985	LOW QUALITY PROTEIN: heat shock 70 kDa protein, mitochondrial-like [Asparagus officinalis]	74.031	18	9	117	4	657	70.2	5.85	224.43	9	1.209	1.255	1.039	0.949282	0.952505	0.99536	21.87	6.2	6.74	76.5	123.5	100	28.77	33.1	32.39
1150715194	thioredoxin reductase NTRB-like [Asparagus officinalis]	100.207	50	9	74	9	331	35.4	6.62	193.6	9	0.641	0.633	0.985	0.949282	0.957023	0.988297	0.47	32.23	31.66	132.8	84.2	82.9	2.64	6.67	23.22
1150682512	cytosolic enolase 3 [Asparagus officinalis]	35.119	24	9	103	8	474	51.5	5.69	209.04	9	1.153	1.097	0.947	0.949282	0.962593	0.973882	3.74	0.66	8.1	89.6	112.2	98.3	11.61	16.22	10.08
1150713619	LOW QUALITY PROTEIN: superoxide dismutase [Mn], mitochondrial-like [Asparagus officinalis]	101.516	54	9	135	8	228	25.5	7.78	368.12	9	0.653	0.707	1.36	0.949282	0.974473	0.729306	22.41	21.25	12.73	124.2	78	97.8	7.69	15.01	32.7
1150687701	proline--tRNA ligase, cytoplasmic isoform X1 [Asparagus officinalis]	55.298	23	9	87	9	564	64.8	8.21	154.44	9	1.191	0.948	0.915	0.949282	0.983932	0.955876	4.82	11.45	4.45	97.7	108.1	94.2	9.82	12.15	5.19
1150706675	60S ribosomal protein L27-3 [Asparagus officinalis]	66.103	55	9	81	9	135	15.6	10.43	207.48	9	0.655	0.79	1.228	0.949282	0.987245	0.916613	2.67	23.22	12.62	121.3	82.8	95.9	2.46	4.37	26.48
1150732822	glutamate--tRNA ligase, cytoplasmic-like [Asparagus officinalis]	30.119	12	9	23	2	732	82.7	8.54	32.12	9	1.251	0.716	0.54	0.949282	0.996321	0.587703	8.92	39.64	30.63	98.6	130.8	70.6	23.11	18.3	11.03
O24246	2,3-bisphosphoglycerate-independent phosphoglycerate mutase (Fragment) OS=Prunus dulcis OX=3755 PE=2 SV=1	65.55	20	9	129	1	488	53.4	5.58	344.98	9	1.301	0.701	0.69	0.949282	0.999557	0.797418	56.67	88.32	71.54	99.9	129.9	70.2	2.56	80.42	99.33
1150723662	succinate dehydrogenase [ubiquinone] flavoprotein subunit, mitochondrial-like [Asparagus officinalis]	95.509	22	9	121	1	577	63.8	6.25	338.55	9	0.545	0.607	0.895	0.955272	0.983298	0.957433	6.35	9.16	29.15	150.9	78.8	70.3	18.48	3.94	28.76
1150687207	bifunctional 3-dehydroquinate dehydratase/shikimate dehydrogenase, chloroplastic-like [Asparagus officinalis]	48.003	22	9	76	8	516	55.8	6.86	145.01	9	0.665	0.788	1.218	0.958943	0.999557	0.916613	4.75	2.92	8.64	125.2	75.9	98.9	10	6.93	10.23
1150723781	methyl-CpG-binding domain-containing protein 10-like [Asparagus officinalis]	78.194	34	9	117	9	536	58	4.96	213.56	9	1.056	1.653	1.489	0.959365	0.860724	0.461335	12.66	11.62	7.5	80.9	85.4	133.7	2.54	20.75	12.95
1150696492	mitochondrial outer membrane protein porin 1-like [Asparagus officinalis]	85.079	36	9	227	8	275	29.4	9.06	631.95	9	1.134	0.968	0.859	0.959365	0.98003	0.916613	0.99	13.5	1.55	98.3	111.4	90.4	4.79	9.37	13.08
1150713080	ricin B-like lectin R40G3 [Asparagus officinalis]	79.501	59	9	194	8	182	20.7	6.44	466.26	9	0.687	0.759	1.104	0.959365	0.98377	0.970388	8.58	15.61	3.3	122.7	84.4	92.9	17.04	9.93	3.57
1150700431	binding partner of ACD11 1-like isoform X1 [Asparagus officinalis]	72.577	38	9	107	7	289	30.7	5.9	225.78	9	0.653	0.567	1.023	0.962579	0.937322	0.995088	16.16	2.28	24.32	136.2	83.1	80.7	5.64	12.74	36.49
1150678410	40S ribosomal protein S13 [Asparagus officinalis]	65.587	40	9	126	9	151	17.1	10.45	326.12	9	1.095	1.028	0.953	0.964132	0.967513	0.972144	7.22	6.21	9.53	99.4	102.7	97.9	10.48	12.34	4.65
1150725692	dihydroxy-acid dehydratase, chloroplastic [Asparagus officinalis]	77.97	24	9	123	9	526	56.5	6.47	304.85	9	0.726	0.863	1.165	0.964132	0.999557	0.922168	2.83	0.83	1.48	116.6	84.7	98.7	10.37	14.12	15.96
1150716849	LOW QUALITY PROTEIN: ubiquitin receptor RAD23d-like [Asparagus officinalis]	106.816	39	9	72	8	393	41.6	4.77	189.34	9	0.682	0.624	0.981	0.967259	0.96419	0.995088	10.68	18.96	9.69	131.2	86.9	81.9	12.84	20.32	31.05
1150741262	probable glucan 1,3-alpha-glucosidase, partial [Asparagus officinalis]	42.663	13	9	52	9	831	93.9	5.97	107.69	9	0.987	0.978	1.017	0.967259	0.973844	0.995895	3.9	4.55	8.1	101.6	101.2	97.3	8.15	10.81	21.18
Q03681	Luminal-binding protein 1 (Fragment) OS=Nicotiana tabacum OX=4097 GN=BIP1 PE=2 SV=1	35.12	30	9	67	1	290	32	4.65	147.16	9	0.94	2.295	1.458	0.975174	0.860724	0.891624	79.39	32.63	32.93	66.8	76.7	156.5	52.79	51.35	35.73
1150736919	caffeic acid 3-O-methyltransferase-like [Asparagus officinalis]	91.427	39	9	141	2	363	39.9	5.57	382.61	9	1.056	0.615	0.536	0.975174	0.961383	0.158236	12.77	2.38	4.7	125.7	111.5	62.7	15.57	22.6	20.63
P49613	S-adenosylmethionine synthase 2 OS=Pisum sativum OX=3888 GN=SAMS2 PE=2 SV=1	90.99	36	9	97	1	374	41	5.4	229.55	9	0.911	0.665	0.508	0.975174	0.999557	0.478965	105.21	64.59	123.27	121	90.8	88.3	14.28	106.39	60.43
1150746204	catalase isozyme 1 [Asparagus officinalis]	59.644	31	9	108	6	492	57	7.47	284.46	9	1.071	1.036	0.915	0.979463	0.975448	0.969289	5.32	35.89	30.1	97.3	104.2	98.5	20.07	15.66	25.68
1150723532	uncharacterized protein LOC109847724 [Asparagus officinalis]	61.616	37	9	57	9	492	53.6	6.9	155.09	9	0.779	0.76	0.976	0.985635	0.98377	0.98762	4.09	2.14	6.06	120.2	91.6	88.2	4.75	5.56	5.04
1150680753	60S ribosomal protein L11-like [Asparagus officinalis]	64.332	50	9	143	4	182	20.8	9.89	306.2	9	0.948	0.955	1.038	0.986803	0.98003	0.993399	22.2	17.23	1.87	103.3	97.9	98.7	4.09	12.22	12.26
1150670357	auxin transport protein BIG [Asparagus officinalis]	30.882	2	9	37	9	5067	562.2	6.3	52.58	9	0.995	1.43	1.486	0.987529	0.907802	0.411339	2.15	32.5	27.67	88.4	85.3	126.4	1.81	2.77	24.46
1150680621	ornithine carbamoyltransferase, chloroplastic [Asparagus officinalis]	69.752	34	9	88	9	363	39.6	7.87	231.15	9	0.787	0.805	1.023	0.987812	0.994357	0.999335	3.95	8.04	2.93	115.4	91.6	92.9	7.12	4.37	3.41
1150694907	LOW QUALITY PROTEIN: thiamine thiazole synthase 1, chloroplastic-like [Asparagus officinalis]	90.195	26	9	154	9	437	46.9	8.6	509.96	9	1.003	0.669	0.818	0.991268	0.96419	0.857155	10.34	2.3	2.07	105.2	112.9	81.9	13.01	24.23	19.27
1150736510	LOW QUALITY PROTEIN: prohibitin-3, mitochondrial-like [Asparagus officinalis]	66.016	53	9	55	9	284	31	8.88	167.71	9	0.928	1.025	1.03	0.991268	0.967513	0.995088	10.07	25.6	6.92	101.1	95.3	103.6	6.39	12.48	26.4
1150691172	tryptophan synthase beta chain 1 [Asparagus officinalis]	50.421	24	9	78	9	377	41.2	6.44	148.49	9	0.806	0.727	0.931	0.991757	0.982884	0.953876	2.67	21.36	7.47	126.7	91.2	82.1	8.02	7.8	21.73
1150693034	phospho-2-dehydro-3-deoxyheptonate aldolase 1, chloroplastic [Asparagus officinalis]	54.603	27	9	77	4	324	36	7.08	183.15	9	0.979	1.826	1.736	0.993913	0.875739	0.131234	10.29	20.63	42.08	87.1	91.6	121.3	32.21	35.87	21.49
1150734064	ras-related protein RABH1b [Asparagus officinalis]	33.768	48	9	50	8	208	23	7.14	113.87	9	0.945	1.188	1.207	0.993913	0.931854	0.916613	5.86	14.43	4.05	94.6	93.1	112.3	8.73	11.29	19.82
1150710220	chorismate mutase 2-like [Asparagus officinalis]	43.68	35	9	39	9	256	29	6.87	62.44	9	0.952	1.184	1.163	0.993913	0.966091	0.916613	6.47	7.37	2.44	94	89.4	116.6	4.43	9.86	10.52
1150746518	ankyrin repeat domain-containing protein 2A-like [Asparagus officinalis]	105.979	43	9	134	7	318	34.3	4.56	455.86	9	0.859	0.805	0.906	0.996275	0.999557	0.946676	2.83	4.99	0.21	113.8	97.7	88.5	11.72	9.2	16.88
1150709453	26S proteasome non-ATPase regulatory subunit 12 homolog A-like [Asparagus officinalis]	60.021	27	9	60	9	442	50.6	7.4	135.4	9	0.847	0.895	0.968	0.996716	0.983932	0.986947	40.98	13.48	2.02	108	95.4	96.6	6.8	24.8	11.16
1150748877	LOW QUALITY PROTEIN: UDP-glucose:glycoprotein glucosyltransferase [Asparagus officinalis]	33.326	7	9	16	9	1623	183.1	5.73	15.92	9	0.895	1.024	1.143	0.997415	0.98003	0.953876	5.4	19.58	14.9	98.4	89.9	111.6	17.24	6.98	22.67
1150715283	cysteine proteinase inhibitor 12-like isoform X2 [Asparagus officinalis]	91.773	53	9	147	3	213	23.9	5.03	405.3	9	0.927	1.004	1.116	0.998724	0.982884	0.960679	21.4	40.52	4.46	106.8	92.7	100.4	8	20.74	41.94
1150714274	subtilisin-like protease SBT1.2 [Asparagus officinalis]	46.757	20	10	40	7	680	72.9	8.07	100.45	10	10.839	15.711	1.379	0.0111354	0.00831918	0.647718	7.54	36.45	13.33	11.4	121.3	167.3	5.37	5.19	26.51
1150749764	subtilisin-like protease SBT1.7 [Asparagus officinalis]	95.265	24	10	101	4	643	68.5	6.87	289.28	10	4.399	6.401	1.49	0.0655446	0.0195304	0.503401	15.69	13.99	17.33	25.2	113.7	161.2	7.63	17.23	28.12
1150747828	late embryogenesis abundant protein D-29-like [Asparagus officinalis]	97.981	51	10	97	10	253	26.6	5.15	267.47	10	3.767	5.617	1.826	0.117886	0.0333822	0.135621	13.72	5.73	23.01	30.9	95.2	173.9	31.64	29.19	49.71
1150734984	cytochrome P450 98A2 [Asparagus officinalis]	42.506	20	10	42	10	509	57.7	7.83	65.87	10	0.219	0.335	1.587	0.237708	0.80017	0.623986	0.58	2.23	5.8	187.9	41.2	70.9	36.37	32.95	31.13
Q84J55	14-3-3-like protein GF14-A OS=Oryza sativa subsp. japonica OX=39947 GN=GF14A PE=2 SV=1	83.401	32	10	307	1	264	29	4.94	690.63	10	3.013	3.186	0.95	0.33394	0.471166	0.965795	24.79	12.25	3.61	41.7	125.6	132.8	1.75	16.93	18.11
1150735858	citrate synthase 4, mitochondrial-like [Asparagus officinalis]	55.561	28	10	114	5	471	52.5	8.12	295.73	10	2.61	3.154	1.081	0.41238	0.306211	0.984408	8.54	34.33	13.49	44.3	115.8	139.9	1.24	20.27	22.14
1150708418	NADP-dependent malic enzyme isoform X1 [Asparagus officinalis]	61.855	19	10	82	10	649	71.9	7.4	291.73	10	0.35	0.38	1.14	0.573845	0.776632	0.946676	7.44	53.73	44.64	175.4	61.4	63.2	4.11	12.63	64.58
1150690421	thiosulfate/3-mercaptopyruvate sulfurtransferase 2-like [Asparagus officinalis]	75.656	40	10	63	10	378	41.2	7.77	155.28	10	0.358	0.263	0.789	0.602672	0.422071	0.801183	6.66	2.1	21.16	184.1	68.2	47.7	3.25	8.19	17.49
O23254	Serine hydroxymethyltransferase 4 OS=Arabidopsis thaliana OX=3702 GN=SHM4 PE=1 SV=1	123.024	21	10	130	1	471	51.7	7.23	353.93	10	3.172	4.581	1.545	0.649543	0.6285	0.786185	6.34	9.44	15.34	32.8	106.6	160.6	26.07	2.52	20.06
Q307Y9	S-adenosylmethionine synthase 1 OS=Solanum tuberosum OX=4113 GN=METK1 PE=2 SV=1	96.329	33	10	109	2	393	43.2	5.82	290.51	10	0.386	0.445	0.882	0.700184	0.875739	0.918138	13.36	3.19	39.76	177.5	68.6	53.9	41.43	26.08	57.72
1150691277	probable galactinol--sucrose galactosyltransferase 2 [Asparagus officinalis]	38.533	20	10	24	10	766	84.3	5.91	33.09	10	0.348	0.207	0.584	0.725863	0.464892	0.508549	3.46	6.36	2.78	186.8	71.5	41.7	23.61	10.94	6.62
1150689072	apoptotic chromatin condensation inducer in the nucleus [Asparagus officinalis]	70.556	25	10	67	10	750	83	4.7	94.17	10	0.383	0.408	1.42	0.780103	0.875739	0.797418	39.78	44.67	8.6	165.9	66.4	67.7	7.25	24.22	41.99
1150735630	60S ribosomal protein L19-3 [Asparagus officinalis]	84.436	34	10	192	10	208	24.3	11.31	489.73	10	1.809	0.921	0.59	0.798072	0.983932	0.165346	3.69	17.2	18.97	82.8	133.5	83.8	10.4	19.28	13.95
1150676538	allene oxide cyclase, chloroplastic-like [Asparagus officinalis]	91.923	38	10	251	10	246	27.1	9.22	554.16	10	0.454	0.331	0.73	0.825417	0.654755	0.592668	8.21	19.51	26.27	166.6	77.1	56.3	4.15	10.37	14.42
P42643	14-3-3-like protein GF14 chi OS=Arabidopsis thaliana OX=3702 GN=GRF1 PE=1 SV=3	113.038	37	10	319	1	267	29.9	4.81	779.86	10	0.236	0.247	1.047	0.835067	0.875739	0.990161	18.87	77.26	93.28	209.3	44.3	46.4	12.3	54.14	82.95
1150700762	LOW QUALITY PROTEIN: eukaryotic translation initiation factor 5B-like [Asparagus officinalis]	69.714	11	10	90	10	1225	137	5.43	148.06	10	1.642	1.804	1.074	0.852226	0.839686	0.977637	3.42	2.18	5.65	84.6	109.9	105.5	19.93	18.11	35.14
1150726435	60S ribosomal protein L10a [Asparagus officinalis]	99.602	38	10	198	3	216	24.7	9.98	519.76	10	0.466	0.277	0.933	0.859117	0.504602	0.970452	41	35.02	25.6	182.9	73.4	43.7	8.57	47.77	72.48
1150670248	probable calcium-binding protein CML7 [Asparagus officinalis]	73.025	73	10	77	10	147	16.5	4.88	203.64	10	0.485	0.549	1.224	0.875644	0.917884	0.906263	1.02	4.84	6.71	150.2	67.4	82.5	21.97	24.19	31.07
1150670611	40S ribosomal protein S17-like [Asparagus officinalis]	92.928	65	10	197	3	142	16.2	10.1	542.07	10	0.434	0.468	1.342	0.892541	0.905257	0.812407	25.77	59.73	16.55	161.1	69.9	69.1	13.7	33.76	60.86
1150744371	pyruvate dehydrogenase E1 component subunit beta-1, mitochondrial-like [Asparagus officinalis]	81.881	42	10	135	6	369	39.6	5.63	384.01	10	0.503	0.481	0.995	0.895003	0.893591	0.995088	6.03	5.21	11.44	142.5	81.9	75.6	10.08	11.09	17.62
1150727937	universal stress protein PHOS32 [Asparagus officinalis]	101.042	79	10	137	8	162	17.8	6.2	417	10	0.507	0.415	0.826	0.895412	0.817316	0.86845	7.77	9.95	9.32	160.1	77.6	62.3	11.72	11.5	23.13
1150688889	40S ribosomal protein S9-2 [Asparagus officinalis]	81.525	39	10	166	2	197	22.9	10.02	488.24	10	1.466	1.372	0.936	0.900326	0.904244	0.954368	29.01	59.4	21.7	79.1	112.3	108.6	13.19	9.8	57.21
1150681536	uncharacterized protein LOC109829216 [Asparagus officinalis]	82.015	88	10	164	7	123	13.3	5.57	370.16	10	1.51	1.239	0.818	0.921519	0.92641	0.856289	7.62	0.49	13.84	77	127.6	95.4	18.89	22.03	12.06
1150728128	gamma carbonic anhydrase 1, mitochondrial-like [Asparagus officinalis]	109.141	52	10	135	7	272	29.7	6.73	323.08	10	0.533	0.479	0.751	0.925948	0.893591	0.664845	8.8	5.95	7.84	149.2	78.2	72.6	1.56	18.26	12.53
1150707608	LOW QUALITY PROTEIN: succinate--CoA ligase [ADP-forming] subunit alpha-1, mitochondrial-like [Asparagus officinalis]	101.923	31	10	118	6	331	34.7	8.87	352.26	10	0.54	0.324	0.79	0.931663	0.635006	0.786485	23.4	24.21	22.06	159.3	85.5	55.2	3.98	18.82	41.13
1150743377	LOW QUALITY PROTEIN: stromal 70 kDa heat shock-related protein, chloroplastic-like [Asparagus officinalis]	72.03	19	10	106	4	616	66.4	5.53	204.68	10	1.737	1.705	0.946	0.931663	0.901572	0.98317	9.17	3.43	18.01	69	111.2	119.7	6.31	8.84	16.57
1150728663	nodal modulator 3 [Asparagus officinalis]	50.975	10	10	101	10	1195	130.3	5.67	163.48	10	1.293	1.659	1.149	0.940913	0.818237	0.939645	14.25	5.44	3.64	71.2	106.5	122.3	8.69	14.61	2.3
1150687356	stress-related protein-like isoform X1 [Asparagus officinalis]	77.466	44	10	155	10	244	26.8	7.9	361.25	10	0.56	0.453	0.81	0.940913	0.874618	0.833308	11.57	30.69	11.34	149	83.4	67.6	17.11	26.57	42.99
1150699318	LOW QUALITY PROTEIN: peptidyl-prolyl cis-trans isomerase-like [Asparagus officinalis]	108.585	57	10	359	8	157	16.9	9.35	1122.17	10	1.432	1.499	1.031	0.940913	0.886176	0.995825	8.48	13.41	11.53	73.9	117.2	108.9	9.76	11.78	12.09
1150692071	proteasome subunit alpha type-5-like [Asparagus officinalis]	56.324	52	10	71	2	237	26	4.75	152.53	10	0.425	0.187	0.415	0.948801	0.777493	0.236837	9.92	1.43	0.75	200.9	70.1	28.9	28.7	28.66	26.22
1150677135	60S ribosomal protein L7-2-like [Asparagus officinalis]	35.507	38	10	86	4	243	28.5	9.92	118.75	10	1.512	1.401	0.892	0.948801	0.930055	0.960643	16.66	10.48	22.78	76	127.9	96.1	19.97	24.39	10.42
1150749269	uncharacterized protein LOC109826187 [Asparagus officinalis]	72.475	22	10	135	4	541	60.7	6.96	333.62	10	0.54	0.525	0.971	0.949282	0.92641	0.990161	13.89	46.36	35.83	143.9	85.7	70.4	21.33	9.59	29.36
1150686911	40S ribosomal protein S15a [Asparagus officinalis]	93.341	77	10	156	10	130	14.8	9.89	414.7	10	0.652	0.662	1.034	0.949282	0.962593	0.99536	2.56	6.41	8.56	130.5	85	84.4	9.31	17.02	31.75
1150679530	LOW QUALITY PROTEIN: RGG repeats nuclear RNA binding protein A-like [Asparagus officinalis]	81.243	38	10	124	9	350	37.3	5.69	286.12	10	1.288	0.814	0.65	0.949282	0.999001	0.337754	7.14	28.58	3.21	95.9	123.5	80.6	9.72	2.5	12.52
1150699556	glutathione S-transferase T1-like [Asparagus officinalis]	88.23	41	10	89	10	240	27.1	8.48	244.93	10	0.545	0.787	1.172	0.949282	0.999557	0.916613	29.53	1.93	34.46	130.5	71.1	98.4	4.65	20.67	41.95
1150716276	acetyl-CoA acetyltransferase, cytosolic 1-like [Asparagus officinalis]	54.143	28	10	72	7	411	42.8	7.05	167.32	10	1.19	1.091	0.846	0.951364	0.973844	0.916613	12.44	62.59	62.9	93.5	111.3	95.2	8.14	1.69	50.62
1150676344	ras-related protein RIC1-like [Asparagus officinalis]	65.204	67	10	81	3	202	22.6	5.27	233.3	10	0.631	0.814	1.318	0.953804	0.997147	0.876701	3.07	9.95	7.44	113.8	86.8	99.4	14.23	19.64	18.81
1150714870	arginine--tRNA ligase, cytoplasmic-like isoform X1 [Asparagus officinalis]	48.544	19	10	105	10	651	73	7.64	244.04	10	1.179	1.277	1.17	0.955272	0.919199	0.921527	9.48	1.83	3.25	84.6	104.1	111.3	10.79	16.28	16.23
1150726774	elongation factor 1-beta-like [Asparagus officinalis]	133.486	61	10	193	7	225	24.5	4.75	627.76	10	1.193	1.264	1.107	0.955272	0.9214	0.966622	2.45	16.08	6.37	100.3	95.6	104.1	14.74	19.23	23.32
1150732468	probable Xaa-Pro aminopeptidase P [Asparagus officinalis]	103.448	26	10	104	10	643	72	6.14	283.38	10	0.645	0.99	1.317	0.955272	0.972382	0.786185	16.56	0.94	25.53	114.9	77.9	107.2	5.44	10.24	24.61
1150675566	17.3 kDa class I heat shock protein-like [Asparagus officinalis]	66.492	58	10	141	3	167	19.1	5.35	307	10	1.264	1.641	1.255	0.956872	0.901572	0.916613	11.26	14.29	5.21	77.7	96.7	125.6	10.33	20.74	22.88
1150679042	sorbitol dehydrogenase [Asparagus officinalis]	70.913	36	10	131	10	357	38.4	6.87	291.48	10	0.688	0.673	0.885	0.959365	0.965327	0.916613	9	1.38	9.52	122.6	94.1	83.3	18.27	18.86	26.95
1150718361	eukaryotic translation initiation factor 3 subunit G-B-like isoform X1 [Asparagus officinalis]	74.692	41	10	132	10	287	32	8.48	292.5	10	1.104	0.989	0.885	0.963282	0.97922	0.916613	4.59	6.64	10.37	99.3	106.3	94.4	13.04	17.14	6.94
1150714388	adenylate kinase 4-like [Asparagus officinalis]	66.292	49	10	65	5	245	26.9	7.42	168.03	10	1.103	0.855	0.866	0.964132	0.999557	0.916613	0.14	1.59	17.57	101.1	106.6	92.3	8.83	5.08	9.5
1150730727	ubiquitin-activating enzyme E1 2-like [Asparagus officinalis]	68.618	11	10	93	6	1065	119.4	5.43	209.36	10	1.012	1.381	1.697	0.966717	0.905257	0.179399	16.84	14.9	12.02	89	100.4	110.6	21.82	33.19	39.77
1150684097	40S ribosomal protein S10-1-like [Asparagus officinalis]	118.795	54	10	163	3	177	19.6	9.61	506.13	10	1.007	1.126	0.981	0.967259	0.953788	0.995088	12.07	30.28	15.3	89.3	106.9	103.8	28.66	17.21	2.24
1150734518	chaperonin CPN60-like 2, mitochondrial [Asparagus officinalis]	32.748	17	10	86	3	577	61.3	5.96	172.42	10	0.583	0.304	0.443	0.975174	0.905257	0.356741	63.93	49.24	50.19	158.8	93	48.2	5.58	44.01	36.06
1150739066	LOW QUALITY PROTEIN: leukotriene A-4 hydrolase homolog [Asparagus officinalis]	57.656	26	10	84	10	475	54.3	5.17	158.46	10	0.714	0.605	0.837	0.975174	0.953788	0.912928	1.65	4.42	6.02	130.2	92.4	77.4	4.94	5.57	10.86
Q5FC15	6(G)-fructosyltransferase OS=Asparagus officinalis OX=4686 GN=FT1 PE=1 SV=1	64.238	22	10	119	8	610	68.3	5.8	236.47	10	0.998	0.724	0.728	0.97612	0.98003	0.607556	26.01	19.45	18.97	119	100.1	81	19.15	34.92	18.52
1150687058	glutathione synthetase, chloroplastic-like isoform X2 [Asparagus officinalis]	54.165	24	10	63	7	563	62	8	119.32	10	0.738	0.803	0.947	0.97627	0.999001	0.984408	4.62	18.45	1.36	124.4	89	86.6	13.04	29.62	25.28
1150675883	threonine--tRNA ligase, mitochondrial 1 [Asparagus officinalis]	63.301	19	10	77	10	693	79.5	6.64	166.44	10	0.762	0.679	0.904	0.978863	0.973449	0.919342	2.38	0.29	2.08	122.5	93.2	84.3	10.2	12.15	16.33
1150696490	hypersensitive-induced response protein 1 [Asparagus officinalis]	87.531	42	10	109	5	285	31.4	5.76	284.07	10	0.962	1.153	1.149	0.991757	0.934163	0.93849	8.15	2.12	0.94	96.3	92.6	111.1	2.98	8.51	9.31
1150735512	26S protease regulatory subunit 7-like isoform X2 [Asparagus officinalis]	71.604	34	10	114	1	425	47.3	6.28	303.18	10	0.65	0.566	0.809	0.991757	0.98003	0.922029	26.14	78.02	18.83	147.3	88.9	63.8	14.99	21.17	71.53
1150738028	polyadenylate-binding protein 2-like [Asparagus officinalis]	61.257	23	10	44	9	683	75.8	8.94	99.38	10	0.934	0.76	0.743	0.991915	0.983932	0.697203	10.08	8.62	2.61	106.9	109.3	83.8	12.37	14.2	4.26
1150724961	dnaJ protein homolog [Asparagus officinalis]	130.176	30	10	209	1	416	46.5	6.4	591.59	10	0.661	0.179	0.336	0.993913	0.80017	0.104676	20.33	36.69	34.82	163	107.7	29.3	6.7	56.46	34.59
1150692810	alanine--glyoxylate aminotransferase 2 homolog 1, mitochondrial, partial [Asparagus officinalis]	75.606	26	10	85	9	433	47.1	7.42	202.47	10	0.786	0.617	0.764	0.993913	0.957189	0.716668	8.9	5.04	0.63	125.6	97.7	76.7	2.51	8.5	8.9
1150696458	coatomer subunit beta'-1-like [Asparagus officinalis]	47.556	15	10	71	2	739	84.1	6.4	156.92	10	0.837	0.612	0.794	0.993913	0.973844	0.916613	13.98	1.33	42.07	117.3	110.9	71.8	22.85	29.94	48.93
1150746793	FAM10 family protein At4g22670 [Asparagus officinalis]	110.549	29	10	165	10	405	43.5	5.07	539.74	10	0.924	0.446	0.568	0.996275	0.864568	0.12418	1.37	4.37	9.79	128.5	109.4	62.1	9.71	6.52	7.43
1150712751	hydroxyacylglutathione hydrolase cytoplasmic [Asparagus officinalis]	61.685	51	10	135	10	258	28.8	6.29	353.75	10	0.899	0.919	1.083	0.997789	0.983932	0.984408	10.38	4.76	2.44	107.6	96.7	95.7	4.71	12.01	12.89
1150741027	annexin-like protein RJ4 [Asparagus officinalis]	64.192	45	11	84	11	310	35.2	6.57	185.16	11	0.125	0.963	7.701	0.0364295	0.976797	2.75261e-15	4.74	0.17	4.56	143.7	18	138.3	2.85	35.23	17.3
1150728844	60S ribosomal protein L21-2 [Asparagus officinalis]	50.852	43	11	170	1	152	17.5	10.52	358.12	11	0.074	0.036	0.511	0.064083	0.107132		43.16	48.03	88.8	272.5	17.7	9.8	7.75	58.89	50.8
1150727702	NADH--cytochrome b5 reductase 1 isoform X1 [Asparagus officinalis]	76.42	55	11	56	11	299	33	8.68	133.07	11	0.206	0.166	0.779	0.117117	0.111911	0.847967	13.42	8.89	9.06	214.2	48.3	37.5	8.83	23.73	3.12
P35493	2,3-bisphosphoglycerate-independent phosphoglycerate mutase OS=Ricinus communis OX=3988 PE=1 SV=2	121.812	25	11	219	1	556	60.8	5.82	792.19	11	2.837	1.451	0.532	0.670431	0.910432	0.519773	5.64	106.35	99.18	45.2	189.3	65.5	26.23	26.26	118.12
1150727868	glutamine synthetase, chloroplastic [Asparagus officinalis]	151.968	35	11	269	7	433	47.7	6.73	803.68	11	0.418	0.361	0.79	0.748547	0.729818	0.786185	26.93	8.55	7.86	179	67.6	53.4	20.82	26.93	20.24
1150736050	TPR repeat-containing thioredoxin TDX isoform X1 [Asparagus officinalis]	85.164	32	11	116	10	397	44.2	6.49	302.97	11	1.855	2.047	0.71	0.772577	0.702224	0.52726	5.14	32.13	16.33	57.9	107.3	134.8	13.6	41.44	42.48
Q8GUM2	Heat shock 70 kDa protein 9, mitochondrial OS=Arabidopsis thaliana OX=3702 GN=HSP70-9 PE=1 SV=1	79.601	14	11	148	1	682	73	5.62	324.46	11	0.233	0.387	1.661	0.813438	0.950938	0.717037	31.87	54.58	137.19	197.9	38.4	63.7	11.75	47.21	90.7
1150721330	GTP-binding nuclear protein Ran1B [Asparagus officinalis]	86.327	46	11	197	1	221	25.1	6.86	550.6	11	0.232	0.179	0.774	0.822816	0.784855		63.22	83.06	34.58	212.6	49.3	38.1	18.8	29.9	61.84
1150697640	phosphoenolpyruvate carboxykinase (ATP) [Asparagus officinalis]	85.562	24	11	69	9	689	75.8	6.92	133	11	0.399	0.427	1.093	0.825417	0.893591	0.973008	17.33	13.79	3.17	146.3	74.3	79.4	15.96	35.95	37.89
1150677731	coatomer subunit beta-1-like isoform X2 [Asparagus officinalis]	104.102	16	11	135	4	943	105.1	5.73	341.82	11	0.409	0.268	0.793	0.852226	0.749839	0.916613	15.51	53.03	31.11	178.9	73.1	47.9	11	37.76	80.77
1150684433	26S proteasome non-ATPase regulatory subunit 6 [Asparagus officinalis]	91.444	33	11	87	11	387	44.2	5.58	223.44	11	0.487	0.418	0.902	0.878404	0.818237	0.922029	7.39	12.1	12.65	159.4	74.1	66.5	9.52	13.95	24.04
1150726005	proteasome subunit alpha type-5 isoform X3 [Asparagus officinalis]	59.684	53	11	76	3	237	26	4.75	167.13	11	0.435	0.216	0.519	0.895003	0.563327	0.352294	4.5	15.66	6.9	184	77.5	38.5	3.56	6.89	13
1150709108	RGG repeats nuclear RNA binding protein A-like [Asparagus officinalis]	114.55	37	11	160	8	376	40.5	8.09	431.29	11	1.574	1.886	1.134	0.895003	0.765111	0.952824	30.34	23.1	3.18	79.9	103.1	117	28.57	16.24	20.32
1150716984	peptidyl-prolyl cis-trans isomerase CYP19-4-like isoform X1 [Asparagus officinalis]	59.592	52	11	192	8	213	23	9.55	409.08	11	1.549	1.982	1.28	0.902258	0.721767	0.859906	3.28	14.41	0.34	66.6	95.9	137.5	10.88	12.44	11.14
1150721254	dnaJ protein homolog [Asparagus officinalis]	141.724	33	11	239	2	417	46.5	6.48	686.84	11	0.433	0.488	1.163	0.909203	0.943431	0.960992	29.57	32.45	33.21	167.8	64.9	67.2	24.75	21.52	73.28
1150713416	elongation factor 1-beta-like [Asparagus officinalis]	147.514	53	11	204	7	272	29.8	5.47	575.14	11	0.522	0.578	0.935	0.912974	0.927637	0.957579	0.31	3.27	14.91	148.7	77.6	73.8	12.38	28.94	16.89
1150724328	ferredoxin--NADP reductase, root isozyme, chloroplastic-like [Asparagus officinalis]	91.766	28	11	80	11	379	42.2	8.9	181.25	11	0.522	0.378	0.692	0.913724	0.768754	0.441319	6.61	8.35	7.88	160.2	82.7	57.2	10.69	21.19	28.72
1150715281	cysteine proteinase inhibitor 12-like isoform X1 [Asparagus officinalis]	111.681	49	11	216	4	239	26.8	6.89	601.7	11	1.517	1.546	1.214	0.917718	0.875739	0.916613	13.67	2.5	3.57	67.1	109.6	123.3	10.71	19.26	13.32
1150680346	protein DJ-1 homolog B isoform X2 [Asparagus officinalis]	95.879	43	11	124	11	394	41.8	5.44	383.77	11	0.542	0.475	0.88	0.931663	0.887807	0.916613	9.89	19.09	11.05	147.2	81.3	71.5	8.59	3.4	22.84
1150718365	ornithine aminotransferase, mitochondrial [Asparagus officinalis]	66.946	28	11	74	11	484	53	8.27	158.55	11	0.548	0.324	0.639	0.937836	0.67655	0.315714	36.57	22.9	11.85	167.8	83	49.2	7.35	27.71	48.9
1150681690	60S ribosomal protein L26-2-like [Asparagus officinalis]	81.956	62	11	187	11	150	16.7	10.89	392.65	11	1.452	1.824	1.198	0.937836	0.794318	0.916613	7.21	12.82	20.66	71.4	103	125.6	10.1	8.38	17.44
1150729579	40S ribosomal protein S19-3-like [Asparagus officinalis]	110.935	63	11	211	3	145	16.2	10.24	502.47	11	0.395	0.221	0.563	0.937836	0.82038	0.623521	12.49	1.19	10.41	186.1	72.5	41.4	18.77	9.95	36.49
1150696878	cysteine synthase isoform X1 [Asparagus officinalis]	108.194	41	11	198	6	327	34.5	5.78	486.96	11	0.508	0.438	0.863	0.940913	0.887807	0.916613	7.31	24.19	16.08	141.9	88.9	69.2	16.61	16.36	51.96
1150686555	60S ribosomal protein L24 [Asparagus officinalis]	61.76	40	11	139	11	162	18.4	10.78	364.37	11	1.42	1.247	0.869	0.940913	0.92641	0.916613	1.45	1.52	4.89	81.7	116.1	102.2	12.12	14	8.83
1150729428	LOW QUALITY PROTEIN: protein BOBBER 1-like [Asparagus officinalis]	69.362	50	11	118	9	262	29.4	5.1	189.2	11	1.389	1.21	0.871	0.940913	0.930055	0.916613	0.7	10.93	11.04	83.5	115.7	100.8	3.1	5.8	14.44
1150717102	mitochondrial dicarboxylate/tricarboxylate transporter DTC-like [Asparagus officinalis]	105.411	45	11	180	5	298	31.8	9.6	540.08	11	0.555	0.321	0.578	0.947558	0.704393	0.12418	25.19	40.98	5.28	162.9	86.9	50.2	15.22	34.04	55.45
1150672176	V-type proton ATPase subunit G 1-like [Asparagus officinalis]	100.703	81	11	201	11	110	12.2	9.47	592.58	11	1.366	1.527	1.101	0.947558	0.875739	0.971904	2.41	2.07	0.17	79	98.7	122.3	7.04	11.2	6.81
1150727269	60S ribosomal protein L10-like [Asparagus officinalis]	55.37	43	11	125	1	222	25.3	10.46	216.69	11	1.455	1.364	0.926	0.948496	0.930055	0.963126	2	37.09	31.25	78.2	115.2	106.6	18.54	14.02	19.9
1150734913	galactokinase [Asparagus officinalis]	92.818	28	11	113	11	497	54	6.23	324.3	11	0.594	0.483	0.863	0.948801	0.893591	0.916613	8.48	2.91	9.13	144.4	85.8	69.8	2	8.88	16.97
1150725281	farnesyl pyrophosphate synthase 1-like [Asparagus officinalis]	69.686	27	11	165	5	349	40.1	5.01	431.87	11	1.283	1.417	1.105	0.949282	0.901572	0.9694	5.74	11.47	5.67	78.3	104.3	117.4	13.07	11.09	20.77
1150727142	uridine 5'-monophosphate synthase [Asparagus officinalis]	77.359	28	11	105	11	453	49	6.74	264.65	11	0.649	0.552	0.82	0.949282	0.917884	0.843396	6.73	3.22	1.41	136.3	88.4	75.4	23.11	10.13	12.03
1150746312	40S ribosomal protein S9-2-like [Asparagus officinalis]	40.021	44	11	117	3	195	22.9	9.99	237.77	11	1.248	1.446	1.159	0.949282	0.92641	0.954783	26.55	50.78	20.1	80.9	97.3	121.8	12.65	11.83	34.84
P12782	Phosphoglycerate kinase, chloroplastic OS=Triticum aestivum OX=4565 PE=2 SV=1	99.96	22	11	210	1	480	49.8	7.03	567.96	11	1.189	0.848	0.948	0.949282	0.986255	0.98762	76.48	82.15	48.8	136.9	88.4	74.7	31.96	92.18	157.2
1150689320	eukaryotic translation initiation factor 3 subunit I-like [Asparagus officinalis]	65.959	41	11	103	11	331	36.3	7.94	183.01	11	0.669	0.543	0.812	0.955272	0.910432	0.836712	31.6	4.02	3.99	136.1	91.1	72.8	8.67	14.49	2.23
[truncated: 536 more rows]

## Sheet: differentially
Accession	Description	Sum PEP Score	Coverage [%]	# Peptides	# PSMs	# Unique Peptides	# AAs	MW [kDa]	calc. pI	Score Sequest HT: A2 Sequest HT	# Peptides (by Search Engine): A2 Sequest HT	Abundance Ratio: (middle) / (inner)	Abundance Ratio: (outer) / (inner)	Abundance Ratio: (outer) / (middle)	Abundance Ratio Adj. P-Value: (middle) / (inner)	Abundance Ratio Adj. P-Value: (outer) / (inner)	Abundance Ratio Adj. P-Value: (outer) / (middle)	Abundance Ratio Variability [%]: (middle) / (inner)	Abundance Ratio Variability [%]: (outer) / (inner)	Abundance Ratio Variability [%]: (outer) / (middle)	Abundances (Grouped): inner	Abundances (Grouped): middle	Abundances (Grouped): outer	Abundances (Grouped) CV [%]: inner	Abundances (Grouped) CV [%]: middle	Abundances (Grouped) CV [%]: outer
[truncated: 228 more rows]

[truncated: 1 more sheets: KEGG]
