# Supplementary material for: Fructans Are Differentially Distributed in Root Tissues of Asparagus
Source: Cells. 2020 Aug 22;9(9):1943. doi: 10.3390/cells9091943 (PMC7565981; doi:10.3390/cells9091943)
Supplement: Supplementary file 1 [file cells-09-01943-s001.zip › Supplementary Table S3.xlsx]

## Sheet: Sheet1
Supplementary Table S3: Results related to carbohydrate metabolism from protein profiling analysis of inner (I), middle (M) and outer (O) asparagus root tissues. Data are sorted by metabolic pathways as annotated based on information in the Kyoto Encyclopedia of Genes and Genomes (KEGG) database (https://www.kegg.jp/kegg/kegg2.html) as well as by accession numbers and peptide score (Sum PEP Score…
KEGG pathway	KEGG sub-pathway	Enzyme code (EC)	Accession	Description	Short Description	Sum PEP Score	Coverage [%]	# Peptides	# PSMs	# Unique Peptides	# AAs	MW [kDa]	calc. pI	Score Sequest HT: A2 Sequest HT	# Peptides (by Search Engine): A2 Sequest HT	Abundance Ratio: M / I	Abundance Ratio: O / I	Abundance Ratio: O / M	Abundance Ratio Adj. P-Value: M / I	Abundance Ratio Adj. P-Value: O / I	Abundance Ratio Adj. P-Value: O / M	Abundance Ratio Variability [%]: M / I	Abundance Ratio Variability [%]: O / I	Abundance Ratio Variability [%]: O / M	Abundances (Grouped): I=inner	Abundances (Grouped): M=middle	Abundances (Grouped): O=outer	Abundances (Grouped) CV [%]: I	Abundances (Grouped) CV [%]: M	Abundances (Grouped) CV [%]: O	Found in Sample: [S10] F10: Sample, 1, 1, I	Found in Sample: [S11] F11: Sample, 1, 2, I	Found in Sample: [S12] F12: Sample, 1, 3, I	Found in Sample: [S13] F13: Sample, 2, 1, I	Found in Sample: [S14] F14: Sample, 2, 2, I	Found in Sample: [S15] F15: Sample, 2, 3, I	Found in Sample: [S16] F16: Sample, 3, 1, I	Found in Sample: [S17] F17: Sample, 3, 2, I	Found in Sample: [S18] F18: Sample, 3, 3, I	Found in Sample: [S19] F19: Sample, 1, 1, M	Found in Sample: [S20] F20: Sample, 1, 2, M	Found in Sample: [S21] F21: Sample, 1, 3, M	Found in Sample: [S22] F22: Sample, 2, 1, M	Found in Sample: [S23] F23: Sample, 2, 2, M	Found in Sample: [S24] F24: Sample, 2, 3, M	Found in Sample: [S25] F25: Sample, 3, 1, M	Found in Sample: [S26] F26: Sample, 3, 2, M	Found in Sample: [S27] F27: Sample, 3, 3, M	Found in Sample: [S1] F1: Sample, 1, 1, O
Citrate cycle	Citrate cycle	2.3.3.1	1150668584	citrate synthase, glyoxysomal-like [Asparagus officinalis]	Citrate synthase	98.049	29	12	106	12	539	60.7	9.96	278.22	12	0.719	0.737	1.042	0.962579	0.98003	0.995088	6.77	2.36	13.17	121.5	91.6	86.9	13.37	21.06	14.25	High	High	High	High	High	High	High	High	High	High	High	High	High	High	High	High	High	High	High
Citrate cycle	Citrate cycle	2.3.3.1	1150735858	citrate synthase 4, mitochondrial-like [Asparagus officinalis]	Citrate synthase	55.561	28	10	114	5	471	52.5	8.12	295.73	10	2.61	3.154	1.081	0.41238	0.306211	0.984408	8.54	34.33	13.49	44.3	115.8	139.9	1.24	20.27	22.14	Peak Found	High	High	Peak Found	High	High	High	High	High	High	High	High	High	High	High	Peak Found	High	High	High
Citrate cycle	Citrate cycle	2.3.3.1	1150682761	citrate synthase 4, mitochondrial [Asparagus officinalis]	Citrate synthase	40.626	15	6	85	1	471	52.4	8.18	250.47	6	0.963	0.893	0.928	0.973328	0.983932	0.976737	15.47	9.41	5.49	106.7	102.7	90.7	67.36	5.52	5.13	Peak Found	Peak Found	Peak Found	Peak Found	Not Found	Peak Found	Not Found	High	Not Found	Peak Found	Peak Found	Peak Found	Peak Found	Peak Found	Peak Found	Peak Found	Peak Found	Peak Found	Peak Found
Citrate cycle	Citrate cycle	1.1.1.42	1150676410	cytosolic isocitrate dehydrogenase [NADP] [Asparagus officinalis]	ICDH, cytosolic	129.714	41	17	175	6	408	45.7	7.42	449.33	17	0.441	0.475	1.162	0.89325	0.905257	0.918093	0.8	18.29	10.74	155.7	69	75.3	3.62	14.1	35.69	High	High	High	High	High	High	High	High	High	High	High	High	Peak Found	Peak Found	Peak Found	High	Peak Found	High	High
Citrate cycle	Citrate cycle	1.1.1.42	1150708840	cytosolic isocitrate dehydrogenase [NADP]-like [Asparagus officinalis]	ICDH, cytosolic	116.494	36	14	144	4	408	45.9	6.57	372.67	14	0.505	0.709	1.402	0.940913	0.976046	0.671457	30.99	4.23	3.99	126.7	73.3	100	8.93	23.13	10.23	High	High	High	High	High	High	High	High	High	Peak Found	Peak Found	Peak Found	High	Peak Found	High	High	High	High	High
Citrate cycle	Citrate cycle	3.1.3.25	1150744632	isocitrate dehydrogenase [NAD] catalytic subunit 5, mitochondrial-like [Asparagus officinalis]	ICDH, mitochondrial	84.613	38	12	117	4	359	39.3	7.64	265.67	12	0.179	0.176	0.983	0.171616	0.367669	0.995088	3.88	2.83	18.29	223.2	40.9	35.8	13.05	27.86	12.53	High	High	High	High	High	High	High	High	High	Peak Found	Peak Found	Peak Found	Peak Found	Peak Found	Peak Found	Peak Found	Peak Found	Peak Found	Peak Found
Citrate cycle	Citrate cycle	3.1.3.25	1150700643	isocitrate dehydrogenase [NADP]-like [Asparagus officinalis]	ICDH, mitochondrial	58.184	20	8	72	2	486	54.9	8.53	198.44	8	0.216	1.524	4.484	0.739472	0.905257	0.00644273	33.93	47.06	84.96	109.5	23.7	166.9	15.45	139.99	54.07	Peak Found	High	High	High	High	High	High	High	High	High	Not Found	Peak Found	High	Not Found	High	Peak Found	High	High	Peak Found
Citrate cycle	Citrate cycle	3.1.3.25	1150743740	isocitrate dehydrogenase [NAD] regulatory subunit 1, mitochondrial-like isoform X2 [Asparagus officinalis]	ICDH, mitochondrial	57.192	29	7	61	5	366	39.8	6.73	130.87	7	1.431	1.608	1.005	0.917842	0.864568	0.995088	8.28	2.39	6.22	77.2	111.1	111.6	10.86	8.6	17.79	High	High	High	High	High	High	High	High	High	Peak Found	High	Peak Found	Peak Found	Peak Found	Peak Found	Peak Found	Peak Found	Peak Found	Peak Found
Citrate cycle	Citrate cycle	3.1.3.25	1150683933	isocitrate dehydrogenase [NAD] catalytic subunit 5, mitochondrial-like [Asparagus officinalis]	ICDH, mitochondrial	53.252	34	9	91	1	358	39.1	7.09	223.93	9	0.278	0.513	1.845	0.890219	0.974053		19.36	1.02	18.22	165.7	49.3	85	57.14	4.49	34.15	Peak Found	Peak Found	High	Peak Found	Not Found	Not Found	Peak Found	High	Peak Found	Not Found	Not Found	Not Found	Not Found	Not Found	Not Found	Not Found	Not Found	Not Found	Not Found
Citrate cycle	Citrate cycle	3.1.3.25	1150686089	isocitrate dehydrogenase [NAD] regulatory subunit 1, mitochondrial, partial [Asparagus officinalis]	ICDH, mitochondrial	38.433	22	4	43	2	283	30.6	7.43	117.35	4	1.06	0.821	0.789	0.959365	0.992524	0.916613	22.35	5.59	2.71	106	104.2	89.8	7.15	13.54	11.73	High	High	High	High	High	High	High	High	High	High	High	High	Peak Found	Peak Found	Peak Found	High	High	High	Peak Found
Citrate cycle	Citrate cycle	1.3.5.1	1150694023	succinate dehydrogenase [ubiquinone] flavoprotein subunit, mitochondrial [Asparagus officinalis]	SucDH	192.819	42	20	246	10	636	69.6	6.71	645.18	20	0.953	0.911	1.023	0.993913	0.985953	0.999335	10.42	10.11	13.53	104.6	103.2	92.3	6.27	16.58	24.14	High	High	High	High	High	High	High	High	High	High	High	High	High	High	High	High	High	High	High
Citrate cycle	Citrate cycle	1.3.5.1	O82663	succinate dehydrogenase [ubiquinone] flavoprotein subunit 1, mitochondrial OS=Arabidopsis thaliana OX=3702 GN=SDH1-1 PE=1 SV=1	SucDH	99.054	21	7	101	1	634	69.6	6.29	301.49	7	0.537	0.704	1.718	0.967259	0.999557		23.45	6.59	57.05	122	65.5	112.5	43.52	78.32	37.26	Not Found	High	Not Found	Not Found	Peak Found	Not Found	Not Found	High	Not Found	Not Found	Not Found	Not Found	Not Found	Not Found	Not Found	Not Found	Not Found	Not Found	Not Found
Citrate cycle	Citrate cycle	1.3.5.1	1150723662	succinate dehydrogenase [ubiquinone] flavoprotein subunit, mitochondrial-like [Asparagus officinalis]	SucDH	95.509	22	9	121	1	577	63.8	6.25	338.55	9	0.545	0.607	0.895	0.955272	0.983298	0.957433	6.35	9.16	29.15	150.9	78.8	70.3	18.48	3.94	28.76	Peak Found	High	Peak Found	High	Peak Found	Peak Found	Peak Found	High	High	Peak Found	Peak Found	High	High	High	Peak Found	High	High	High	High
Citrate cycle	Citrate cycle	1.3.5.1	1150684524	succinate dehydrogenase subunit 5, mitochondrial-like [Asparagus officinalis]	SucDH	57.695	35	7	52	7	245	26.4	7.97	183.37	7	0.906	0.786	0.993	0.997206	0.986255	0.993437	2.39	13.96	4.62	115.4	93.4	91.3	7.46	11.53	7.21	High	High	High	High	High	High	High	High	High	Peak Found	High	Peak Found	Peak Found	High	High	Peak Found	Peak Found	Peak Found	High
Citrate cycle	Citrate cycle	1.3.5.1	1150749205	succinate dehydrogenase subunit 6, mitochondrial [Asparagus officinalis]	SucDH	40.294	34	3	57	3	149	16.8	8.7	193.9	3	0.746	0.953	0.942	0.991757	0.98003	0.974307	1.32	19.7	54.27	107.4	92.4	100.2	9.11	14.56	32.46	High	High	High	High	High	High	High	High	High	High	High	High	High	High	High	High	High	High	High
Citrate cycle	Citrate cycle	1.3.5.1	1150699584	succinate dehydrogenase subunit 7, mitochondrial-like [Asparagus officinalis]	SucDH	18.146	15	2	53	2	88	9.6	10.29	146	2	1.301	1.119	0.905	0.940913	0.943784	0.924379	19.18	1.16	29.33	86.3	112.2	101.6	4.56	15.59	4.34	High	High	High	High	High	High	High	High	High	High	High	High	High	High	High	High	High	High	High
Citrate cycle	Citrate cycle	1.3.5.1	1150726579	succinate dehydrogenase subunit 3-2, mitochondrial-like isoform X1 [Asparagus officinalis]	SucDH	10.106	11	1	10	1	134	14	9.86	23.37	1	0.045	0.074	1.769	0.00904529	0.278408	0.66302	23.78	8.92	0.62	275	9	15.9	25.33	35.26	20.64	High	High	High	High	High	High	High	High	High	Not Found	Not Found	Not Found	Not Found	Not Found	Not Found	Peak Found	Not Found	Not Found	Not Found
Citrate cycle	Citrate cycle	1.3.5.1	Q9S827	succinate dehydrogenase [ubiquinone] iron-sulfur subunit 1, mitochondrial OS=Oryza sativa subsp. japonica OX=39947 GN=SDH2-1 PE=1 SV=1	SucDH	6.76	7	2	5	1	281	31.1	8.48	2.32	2	0.172	0.385	2.236	0.670431	0.949627	0.356741	69.75	23.44	94.6	188.5	42.1	69.5	23.91	56.25	31.38	High	High	Peak Found	High	Peak Found	Peak Found	High	Peak Found	Peak Found	Not Found	Peak Found	Not Found	Not Found	Not Found	Not Found	Not Found	Not Found	Peak Found	Peak Found
Citrate cycle	Citrate cycle	1.3.5.1	1150749148	succinate dehydrogenase subunit 7, mitochondrial-like [Asparagus officinalis]	SucDH	3.073	13	1	3	1	86	9.6	10.14	6.18	1	0.881	0.882	0.889	0.991757	0.98377	0.95977	6.25	18.55	12.69	104.9	103.3	91.8	8.51	9.66	20.14	High	High	High	Peak Found	Peak Found	Peak Found	Peak Found	Peak Found	Peak Found	Peak Found	Peak Found	Peak Found	Peak Found	Peak Found	Peak Found	Peak Found	Peak Found	Peak Found	Peak Found
Citrate cycle	Citrate cycle	6.2.1.4 and 6.2.1.5	1150697923	succinate--CoA ligase [ADP-forming] subunit beta, mitochondrial [Asparagus officinalis]	SucDH	189.394	52	23	326	23	422	45.2	6.32	826.17	23	1.403	1.59	1.134	0.940913	0.864568	0.952824	3.64	14.54	10.64	76.4	104.8	118.8	5.95	4.56	12.1	High	High	High	High	High	High	High	High	High	High	High	High	High	High	High	High	High	High	High
Citrate cycle	Citrate cycle	6.2.1.4 and 6.2.1.5	P68209	succinate--CoA ligase [ADP-forming] subunit alpha-1, mitochondrial OS=Arabidopsis thaliana OX=3702 GN=At5g08300 PE=1 SV=1	SucDH	26.917	13	5	20	1	347	36.1	8.27	35.62	5	0.938	0.895	1.059	0.989362	0.98377	0.990161	22.76	35.11	25.13	99.7	93.5	106.8	13.36	8.64	22.71	Peak Found	High	Peak Found	Peak Found	Peak Found	Peak Found	Peak Found	Peak Found	Peak Found	Peak Found	Peak Found	Peak Found	Peak Found	Peak Found	Peak Found	Peak Found	Peak Found	Peak Found	Peak Found
Citrate cycle	Citrate cycle	1.2.1.24	1150717654	succinate-semialdehyde dehydrogenase, mitochondrial [Asparagus officinalis]	SucSaDH	79.989	26	12	138	12	551	59.8	7.5	330.33	12	0.945	0.819	0.948	0.993913	0.999557	0.967644	2.83	13.21	16.93	108.1	102.1	89.8	6.25	4.45	12.72	High	High	High	High	High	High	High	High	High	High	High	High	High	High	High	High	High	High	High
Fructose and mannose metabolism	Fructose and mannose metabolism	2.7.7.13	Q941T9	probable mannose-1-phosphate guanylyltransferase 2 OS=Oryza sativa subsp. japonica OX=39947 GN=Os01g0847200 PE=2 SV=1	M1P GuT	13.206	11	2	25	2	361	39.6	6.86	73.99	2	1.097	1.188	1.198	0.965972	0.950938	0.921803	1.61	14.79	15.81	92	98.6	109.3	6.06	14.09	5.3	High	High	High	High	High	High	High	High	High	Peak Found	Peak Found	Peak Found	High	High	Peak Found	High	High	High	High
Fructose and mannose metabolism	Fructose and mannose metabolism	2.7.7.13	1150741341	LOW QUALITY PROTEIN: mannose-1-phosphate guanyltransferase alpha-like [Asparagus officinalis]	M1P GuT	5.651	6	2	3	2	415	45.9	6.54	5.15	2	0.274	1.216	4.446	0.793378	0.950938	0.00109724	111.93	30.61	83.76	120.5	33	146.6	9.69	101.23	15.06	Peak Found	Peak Found	Peak Found	High	Peak Found	Peak Found	Peak Found	Peak Found	Peak Found	Not Found	Peak Found	Not Found	Peak Found	Peak Found	Peak Found	Not Found	Not Found	Not Found	Peak Found
Fructose and mannose metabolism	Fructose and mannose metabolism	5.4.2.8	1150726786	phosphomannomutase [Asparagus officinalis]	PMM	59.58	46	7	65	5	247	27.9	6.09	179.53	7	1.009	1.261	1.282	0.967259	0.912644	0.836712	3.91	17.19	7.47	101.2	87.1	111.7	18.18	14.75	21.71	High	High	High	High	High	High	High	High	High	High	High	Peak Found	High	High	High	High	High	High	High
Fructose and mannose metabolism	Fructose and mannose metabolism	5.4.2.8	Q1W377	phosphomannomutase OS=Solanum lycopersicum OX=4081 PE=2 SV=1	PMM	16.449	15	3	9	1	252	28.5	6.24	20.51	3	1.595	1.448	0.852	0.940913	0.930055	0.953735	4.45	13.27	23.55	57	90.9	152.1	87.58	81.61	68.71	Peak Found	Peak Found	Peak Found	Peak Found	High	High	Peak Found	Peak Found	Peak Found	Peak Found	Peak Found	Peak Found	Peak Found	Peak Found	Peak Found	Peak Found	Peak Found	Peak Found	Peak Found
Fructose and mannose metabolism	Fructose and mannose metabolism	5.4.2.8	1150677703	phosphomannomutase-like [Asparagus officinalis]	PMM	15.051	30	3	9	1	184	21.5	5.82	18.24	3	0.26	0.346	1.438	0.880738	0.92641		15.93	10.99	17.52	200.4	38.2	61.4	21.84	26.76	12.89	High	Peak Found	Peak Found	Peak Found	Peak Found	Peak Found	Peak Found	High	Peak Found	Not Found	Not Found	Not Found	Not Found	Not Found	Not Found	Not Found	Not Found	Not Found	Not Found
Fructose and mannose metabolism	Fructose and mannose metabolism	2.7.1.4	1150747304	LOW QUALITY PROTEIN: fructokinase-1-like [Asparagus officinalis]	Fructokinase-1	23.657	18	4	26	3	313	34	5.03	59.12	4	0.68	2.992	4.25	0.993913	0.704635	0.000444113	25.64	48.6	5.23	56.5	46.4	197.1	58.48	37.41	23.59	High	Peak Found	Peak Found	Peak Found	Peak Found	Peak Found	High	High	High	Peak Found	Peak Found	Peak Found	Peak Found	Peak Found	Peak Found	Peak Found	Peak Found	Peak Found	Peak Found
Fructose and mannose metabolism	Fructose and mannose metabolism	1.1.1.271	1150710361	probable GDP-L-fucose synthase 1 [Asparagus officinalis]	GDP-L-fucose S	6.98	16	3	3	3	317	34.9	6.46	0	3	0.849	1.045	1.546	0.998788	0.967513	0.671457	0.7	56.77	15.93	105.4	84.5	110.1	16.26	23.96	53.73	High	High	Peak Found	Peak Found	Peak Found	Peak Found	Peak Found	Peak Found	Peak Found	Peak Found	Peak Found	Peak Found	Peak Found	Peak Found	Peak Found	Peak Found	Peak Found	Peak Found	Peak Found
Galactose metabolism	Galactose metabolism	1.1.1.316	1150693909	L-galactose dehydrogenase [Asparagus officinalis]	L-gal DH	11.765	13	2	7	2	322	34.8	5.52	10.41	2	0.445	2.231	4.156	0.949282	0.887807	0.00696098	25.03	43.07	30.52	57.4	47	195.5	50.7	68.6	31.21	Peak Found	High	High	Peak Found	Peak Found	Peak Found	Peak Found	Peak Found	Peak Found	Peak Found	Not Found	Not Found	Peak Found	Peak Found	Peak Found	Not Found	Not Found	Not Found	High
Galactose metabolism	Galactose metabolism	3.2.1.23	1150702484	beta-galactosidase 3 [Asparagus officinalis]	ß-galactosidase	49.954	11	5	75	5	849	94.5	6.47	115.31	5	1.821	1.32	0.775	0.79136	0.905257	0.746361	16.01	1.82	11.37	71.5	130.2	98.3	4.07	9.03	4.76	High	High	High	High	High	High	High	High	High	High	High	High	High	High	High	High	High	High	High
Galactose metabolism	Galactose metabolism	3.2.1.23	1150701497	beta-galactosidase 5-like [Asparagus officinalis]	ß-galactosidase	28.7	10	5	19	5	789	87.7	6.84	45.74	5	0.775	1.476	1.904	0.99077	0.919199	0.139381	9.7	29.15	21.35	91	66.2	142.8	33.57	9.66	22.58	Peak Found	Peak Found	Peak Found	High	High	High	High	High	High	Peak Found	Peak Found	Peak Found	Peak Found	Peak Found	Peak Found	Peak Found	Peak Found	Peak Found	Peak Found
Galactose metabolism	Galactose metabolism	3.2.1.23	1150697636	beta-galactosidase 6 isoform X1 [Asparagus officinalis]	ß-galactosidase	25.716	8	3	18	3	850	92.7	6.61	42.52	3	0.764	1.201	1.481	0.97612	0.962288	0.572996	2.74	11.13	8.1	103.6	79.1	117.4	13.8	17.59	3.48	High	High	High	High	High	Peak Found	High	High	High	Peak Found	Peak Found	Peak Found	Peak Found	Peak Found	Peak Found	Peak Found	High	High	High
Galactose metabolism	Galactose metabolism	3.2.1.23	1150745863	beta-galactosidase 15 isoform X1 [Asparagus officinalis]	ß-galactosidase	8.741	3	3	8	3	892	98.6	7.9	12.62	3	0.517	0.766	1.567	0.949282	0.999557	0.746361	25.93	38.11	16.49	125.9	78.1	96	11.01	23.58	24.41	High	Peak Found	Peak Found	High	Peak Found	High	High	High	High	Peak Found	Peak Found	Peak Found	Peak Found	Peak Found	Peak Found	Peak Found	Peak Found	Peak Found	Peak Found
raffinose synthase	Galactose metabolism	2.4.1.82	1150691277	probable galactinol--sucrose galactosyltransferase 2 [Asparagus officinalis]	Gal:suc GaT 2	38.533	20	10	24	10	766	84.3	5.91	33.09	10	0.348	0.207	0.584	0.725863	0.464892	0.508549	3.46	6.36	2.78	186.8	71.5	41.7	23.61	10.94	6.62	High	High	High	High	High	High	High	High	High	Peak Found	Peak Found	Peak Found	Peak Found	Peak Found	Peak Found	Peak Found	Peak Found	Peak Found	Peak Found
Galactose metabolism	Galactose metabolism	5.1.3.2	1150732458	UDP-glucose 4-epimerase GEPI48-like [Asparagus officinalis]	UDP-g 4-epimerase	3.624	9	2	5	2	352	38.2	8.16	1.61	2	0.207	0.216	1.127	0.747686	0.841571	0.960679	4.82	24.41	15.6	211.7	40.5	47.7	18.33	22.16	2.61	High	High	Peak Found	Peak Found	Peak Found	High	Peak Found	High	Peak Found	Not Found	Not Found	Not Found	Not Found	Not Found	Not Found	Not Found	Not Found	Not Found	Not Found
Glycolysis/Gluconeogenesis	Glycolysis/Gluconeogenesis	5.1.3.3	1150698495	aldose 1-epimerase [Asparagus officinalis]	Aldose 1-epimerase	50.26	39	8	43	8	339	37	6.46	84.75	8	0.381	0.295	0.775	0.798072	0.721767	0.916613	17.65	42.15	18.34	188.3	64.1	47.6	10.46	23.68	38.5	High	High	High	High	High	High	High	High	High	High	High	Peak Found	Peak Found	Peak Found	Peak Found	Peak Found	High	Peak Found	Peak Found
Glycolysis/Gluconeogenesis	Glycolysis/Gluconeogenesis	5.1.3.3	1150733229	aldose 1-epimerase [Asparagus officinalis]	Aldose 1-epimerase	8.542	15	3	4	3	362	39.7	7.93	2.26	3	3.962	5.412	1.495	0.330067	0.453223	0.701087	13.52	0.81	11.76	26.8	107.4	165.8	13.21	2.26	15.19	Peak Found	Peak Found	Peak Found	Peak Found	Peak Found	Not Found	Not Found	Not Found	Not Found	High	High	Peak Found	High	Peak Found	Peak Found	Peak Found	Peak Found	Peak Found	Peak Found
Glycolysis/Gluconeogenesis	Glycolysis/Gluconeogenesis	1.2.1.12	1150698724	glyceraldehyde-3-phosphate dehydrogenase 2, cytosolic [Asparagus officinalis]	GAPDH	586.075	94	42	1476	7	341	36.9	7.84	3921.33	42	0.355	0.396	1.126	0.587233	0.794318	0.955876	12.15	13.51	1.48	169.8	61.6	68.6	2.26	28.91	25.92	High	High	High	High	High	High	High	High	High	High	High	High	High	High	High	High	High	High	High
Glycolysis/Gluconeogenesis	Glycolysis/Gluconeogenesis	1.2.1.12	1150750720	glyceraldehyde-3-phosphate dehydrogenase 2, cytosolic-like [Asparagus officinalis]	GAPDH	545.12	78	37	1435	5	341	37	7.43	3946.95	37	0.397	0.393	0.989	0.705394	0.794318	0.990161	11.77	12.53	0.83	167.6	66.5	65.8	8.9	7.62	24.75	High	High	High	High	High	High	High	High	High	High	High	High	High	High	High	High	High	High	High
Glycolysis/Gluconeogenesis	Glycolysis/Gluconeogenesis	1.2.1.12	1150743087	glyceraldehyde-3-phosphate dehydrogenase 3, cytosolic-like isoform X1 [Asparagus officinalis]	GAPDH	288.52	78	31	795	7	339	36.6	8.43	1959.22	31	1.116	1.25	1.121	0.95983	0.924485	0.957798	4.76	24.82	20.73	89.1	99.4	111.4	26.95	23.6	8.09	High	High	High	High	High	High	High	High	High	High	High	High	High	High	High	High	High	High	Peak Found
Glycolysis/Gluconeogenesis	Glycolysis/Gluconeogenesis	1.2.1.12	1150684479	glyceraldehyde-3-phosphate dehydrogenase 3, cytosolic [Asparagus officinalis]	GAPDH	285.475	83	29	750	8	339	36.7	8.18	1960.51	29	0.683	0.553	0.874	0.958943	0.919199	0.916613	4.19	14.75	10.3	130.4	91.6	78	20.53	27.19	17.62	High	High	High	High	High	High	High	High	High	High	High	High	High	High	High	High	High	High	High
Glycolysis/Gluconeogenesis	Glycolysis/Gluconeogenesis	1.2.1.12	P25861	glyceraldehyde-3-phosphate dehydrogenase, cytosolic OS=Antirrhinum majus OX=4151 GN=GAPC PE=2 SV=1	GAPDH	279.225	46	19	760	1	337	36.7	8.28	2023.39	19	1.136	0.831	0.694	0.959365	0.999557	0.470162	25.22	27.12	7.62	112.4	113.9	73.7	30.93	15.23	18.75	Peak Found	Peak Found	Peak Found	High	Peak Found	Peak Found	Peak Found	Peak Found	Peak Found	Peak Found	Peak Found	Peak Found	Peak Found	Peak Found	High	Peak Found	Peak Found	High	Peak Found
Glycolysis/Gluconeogenesis	Glycolysis/Gluconeogenesis	1.2.1.12	1150738474	glyceraldehyde-3-phosphate dehydrogenase GAPCP2, chloroplastic-like [Asparagus officinalis]	GAPDH	29.688	21	7	205	3	409	43.5	7.44	350.07	7	0.581	0.382	0.701	0.949282	0.893591	0.81111	6.62	15.47	2.56	149.8	89.4	60.8	11.96	13.88	4.59	High	High	High	High	High	High	High	High	High	Peak Found	Peak Found	Peak Found	Peak Found	Peak Found	Peak Found	Peak Found	High	Peak Found	Peak Found
Glycolysis/Gluconeogenesis	Glycolysis/Gluconeogenesis	1.2.1.12	1150718517	glyceraldehyde-3-phosphate dehydrogenase GAPCP2, chloroplastic-like [Asparagus officinalis]	GAPDH	20.775	13	5	197	1	423	44.5	8.7	327.14	5	0.232	0.469	2.652	0.832978	0.98003	0.123898	27.56	44.7	13.85	171.8	47.6	80.6	11.61	23.78	70.07	High	High	Peak Found	High	Peak Found	Peak Found	High	High	Peak Found	Not Found	Not Found	Not Found	Peak Found	Not Found	Not Found	Not Found	Not Found	Not Found	Not Found
Glycolysis/Gluconeogenesis	Glycolysis/Gluconeogenesis	2.7.2.3	1150691322	phosphoglycerate kinase, cytosolic [Asparagus officinalis]	P-glycerate kinase	549.199	84	32	1203	19	401	42.2	6.83	4093.29	32	1.169	1.15	0.983	0.958943	0.946148	0.990161	8.16	0.22	7.93	92	102.3	105.7	11.43	3.31	6.67	High	High	High	High	High	High	High	High	High	High	High	High	High	High	High	High	High	High	High
Glycolysis/Gluconeogenesis	Glycolysis/Gluconeogenesis	2.7.2.3	1150691324	phosphoglycerate kinase, chloroplastic [Asparagus officinalis]	P-glycerate kinase	150.991	50	18	286	7	442	46	6.67	748.39	18	0.426	0.425	0.864	0.872815	0.875739	0.916613	0.42	15.05	27.41	160.1	75.1	64.9	10.12	10.39	11.25	High	High	High	High	High	High	High	High	High	Peak Found	Peak Found	High	High	High	Peak Found	High	High	High	High
Glycolysis/Gluconeogenesis	Glycolysis/Gluconeogenesis	2.7.2.3	1150728136	LOW QUALITY PROTEIN: phosphoglycerate kinase, cytosolic-like [Asparagus officinalis]	P-glycerate kinase	111.091	38	11	231	4	401	42.2	7.14	723.07	11	0.81	0.672	0.858	0.993913	0.967513	0.918093	36.2	4.77	23.17	127.3	101.2	71.5	17.69	20.11	17.11	Peak Found	High	High	High	High	High	High	High	High	Peak Found	High	Peak Found	High	Peak Found	Peak Found	Peak Found	High	High	Peak Found
Glycolysis/Gluconeogenesis	Glycolysis/Gluconeogenesis	2.7.2.3	P29409	phosphoglycerate kinase, chloroplastic (Fragment) OS=Spinacia oleracea OX=3562 PE=2 SV=2	P-glycerate kinase	102.265	27	13	200	2	433	45.5	6.16	540.92	13	0.245	0.131	0.459	0.854828	0.634641	0.490068	112.14	91.86	57.58	199.3	51.9	48.8	84.64	65.01	57.34	Peak Found	Peak Found	Peak Found	High	Peak Found	Peak Found	Peak Found	High	Peak Found	Peak Found	Peak Found	Peak Found	High	Peak Found	Peak Found	Peak Found	High	Peak Found	Peak Found
Glycolysis/Gluconeogenesis	Glycolysis/Gluconeogenesis	2.7.2.3	P12782	phosphoglycerate kinase, chloroplastic OS=Triticum aestivum OX=4565 PE=2 SV=1	P-glycerate kinase	99.96	22	11	210	1	480	49.8	7.03	567.96	11	1.189	0.848	0.948	0.949282	0.986255	0.98762	76.48	82.15	48.8	136.9	88.4	74.7	31.96	92.18	157.2	Not Found	Not Found	Not Found	Not Found	Not Found	Not Found	Not Found	Not Found	Not Found	Not Found	Not Found	Not Found	Peak Found	Peak Found	Not Found	Not Found	Not Found	Not Found	Not Found
Glycolysis/Gluconeogenesis	Glycolysis/Gluconeogenesis	5.4.2.2	1150732840	phosphoglucomutase, cytoplasmic 1-like [Asparagus officinalis]	PGM	337.224	57	36	529	19	583	63.4	6.3	1643.36	36	0.767	0.673	0.891	0.975274	0.965327	0.918093	2.24	3.3	5.59	121	95.4	83.5	10.76	12.04	13.67	High	High	High	High	High	High	High	High	High	High	High	High	High	High	High	High	High	High	High
Glycolysis/Gluconeogenesis	Glycolysis/Gluconeogenesis	5.4.2.2	1150716707	probable phosphoglucomutase, cytoplasmic 1 [Asparagus officinalis]	PGM	276.434	50	28	436	11	583	63.5	6.42	1255.99	28	0.599	0.612	1.022	0.949282	0.942491	0.999335	6.91	32.41	32.63	135.7	81.2	83	9.27	15.07	43.15	High	High	High	High	High	High	High	High	High	High	High	High	High	High	High	High	High	High	High
Glycolysis/Gluconeogenesis	Glycolysis/Gluconeogenesis	5.4.2.11	1150697646	phosphoglycerate mutase-like protein 1 isoform X1 [Asparagus officinalis]	P-glycerate mutase	46.111	17	5	66	5	366	40.5	7.14	212.18	5	0.803	1.14	1.419	0.993913	0.966238	0.59155	7.14	25.2	11.59	110.6	80.7	108.7	8.61	10.4	19.49	High	High	High	High	High	High	High	High	High	High	High	High	High	High	High	High	High	High	High
Glycolysis/Gluconeogenesis	Glycolysis/Gluconeogenesis	1.1.1.2	1150671279	probable aldo-keto reductase 2 [Asparagus officinalis]	Aldo-keto reductase	35.704	26	5	29	5	257	28.5	5.91	68.63	5	0.259	0.28	1.338	0.489017	0.742879	0.916613	49.26	61.35	11.98	188.4	48.9	62.7	13.64	23.1	41.22	High	High	High	High	High	High	High	High	High	Peak Found	Peak Found	Peak Found	Peak Found	Peak Found	Peak Found	Peak Found	Peak Found	Peak Found	Peak Found
Glycolysis/Gluconeogenesis	Glycolysis/Gluconeogenesis	5.1.3.15	1150707925	putative glucose-6-phosphate 1-epimerase [Asparagus officinalis]	G6P 1-epimerase	100.79	51	14	120	13	315	35.5	5.85	280.3	14	0.546	0.472	0.824	0.937836	0.88147	0.856289	15.43	8.93	22.15	147.9	80.7	71.4	2.33	8.85	17.45	High	High	High	High	High	High	High	High	High	High	High	High	High	High	High	High	High	High	High
Glycolysis/Gluconeogenesis	Glycolysis/Gluconeogenesis	5.1.3.15	Q40784	putative glucose-6-phosphate 1-epimerase OS=Cenchrus ciliaris OX=35872 PE=2 SV=1	G6P 1-epimerase	7.071	7	2	28	1	329	36.4	6.8	49.74	2	1.82	2.472	1.171	0.925624	0.794318	0.962595	19.07	35.08	6.6	53.5	116.3	130.1	24.4	24.74	18.64	Peak Found	Peak Found	Peak Found	Peak Found	Peak Found	Peak Found	Peak Found	Peak Found	Peak Found	Peak Found	Peak Found	Peak Found	Peak Found	High	Peak Found	Peak Found	Peak Found	Peak Found	Peak Found
Glycolysis/Gluconeogenesis	Glycolysis/Gluconeogenesis	2.7.1.90	1150696295	pyrophosphate--fructose 6-phosphate 1-phosphotransferase subunit beta-like [Asparagus officinalis]	PP:F6P 1-PT	194.7	43	20	388	13	569	62.1	7.44	1041.52	20	0.774	0.734	1.117	0.979787	0.98003	0.960679	0.48	19.6	25.54	123.4	86.1	90.5	12.5	17.06	36.87	High	High	High	High	High	High	High	High	High	High	High	High	High	High	High	High	High	High	High
Glycolysis/Gluconeogenesis	Glycolysis/Gluconeogenesis	2.7.1.90	1150676049	pyrophosphate--fructose 6-phosphate 1-phosphotransferase subunit alpha-like isoform X1 [Asparagus officinalis]	PP:F6P 1-PT	132.905	30	12	217	6	614	67.2	7.08	742.35	12	0.975	0.806	0.836	0.991757	0.999557	0.879715	1.96	1.61	3.63	122.8	92.9	84.3	22	28.66	25.2	High	High	High	High	High	High	High	High	High	High	High	High	High	High	High	High	High	High	High
Glycolysis/Gluconeogenesis	Glycolysis/Gluconeogenesis	2.7.1.90	1150709530	pyrophosphate--fructose 6-phosphate 1-phosphotransferase subunit alpha-like isoform X2 [Asparagus officinalis]	PP:F6P 1-PT	112.508	27	12	217	7	621	68.4	7.11	763.21	12	0.934	0.976	0.989	0.994359	0.98003	0.990161	4.61	5.49	2.61	107.7	97.5	94.8	9.41	15.03	13.49	High	High	High	High	High	High	High	High	High	High	High	High	High	High	High	High	High	High	High
Glycolysis/Gluconeogenesis	Glycolysis/Gluconeogenesis	2.7.1.90	1150737422	pyrophosphate--fructose 6-phosphate 1-phosphotransferase subunit beta 1, partial [Asparagus officinalis]	PP:F6P 1-PT	101.592	31	12	147	5	512	56.1	6.89	389.13	12	0.975	1.166	1.18	0.993913	0.966238	0.916613	1.9	20.03	18.37	103.2	88.7	108.1	9.13	11.85	15.64	High	High	High	High	High	High	High	High	High	High	High	Peak Found	High	High	High	High	High	High	High
Glycolysis/Gluconeogenesis	Glycolysis/Gluconeogenesis	2.7.1.90	1150715166	pyrophosphate--fructose 6-phosphate 1-phosphotransferase subunit alpha [Asparagus officinalis]	PP:F6P 1-PT	11.046	5	3	20	1	617	67.2	7.02	29.19	3	0.376	1.274	3.393	0.947558	0.950938	0.0417175	80.66	52.87	50.9	132	38.2	129.8	17.75	90.29	51.29	Peak Found	High	High	Peak Found	High	Peak Found	High	High	High	Not Found	Not Found	Not Found	Not Found	Not Found	Peak Found	Peak Found	Peak Found	Peak Found	Peak Found
Glycolysis/Gluconeogenesis	Pyruvate metabolism	4.1.1.1	1150714906	LOW QUALITY PROTEIN: pyruvate decarboxylase 2-like [Asparagus officinalis]	Pyruvate DC	52.556	16	9	144	4	592	64.9	7.39	380.8	9	0.445	0.385	0.829	0.804137	0.785903	0.892909	6.16	41.11	22.12	162.2	75.3	62.4	21.72	24.38	50.68	High	High	High	High	High	High	High	High	High	High	Peak Found	Peak Found	Peak Found	High	Peak Found	Peak Found	High	High	Peak Found
Glycolysis/Gluconeogenesis	Pyruvate metabolism	4.1.1.1	P51846	pyruvate decarboxylase 2 OS=Nicotiana tabacum OX=4097 GN=PDC2 PE=2 SV=1	Pyruvate DC	35.823	7	4	126	1	614	67	5.96	306.98	4	1.075	0.716	0.642	0.967259	0.978075	0.308394	4.77	19.01	5.39	96.8	123.9	79.2	38.71	31.78	9.6	High	High	High	High	High	High	High	High	High	High	High	High	High	High	High	High	High	High	High
Glycolysis/Gluconeogenesis	Pyruvate metabolism	4.1.1.1	P51851	pyruvate decarboxylase 2 (Fragment) OS=Pisum sativum OX=3888 GN=PDC2 PE=2 SV=1	Pyruvate DC	34.706	19	6	76	1	405	44.1	6.68	166.43	6	0.758	0.421	0.551	0.991268	0.889543	0.199866	20.35	27.63	18.79	138.3	103.4	58.2	36.51	31.73	16.81	High	High	Peak Found	Peak Found	Peak Found	High	High	Peak Found	High	Peak Found	Peak Found	Peak Found	Peak Found	Peak Found	Peak Found	High	High	High	Peak Found
Glycolysis/Gluconeogenesis	Pyruvate metabolism	1.2.4.1	1150742273	pyruvate dehydrogenase E1 component subunit alpha-1, mitochondrial-like [Asparagus officinalis]	Pyruvate DH E1	205.332	40	23	286	11	449	49.6	8.7	823.75	23	0.769	0.843	1.096	0.97612	0.999716	0.972144	13.14	4.77	4.82	116.5	90.2	93.3	4.95	14.36	11.51	High	High	High	High	High	High	High	High	High	High	High	High	High	High	High	High	High	High	High
Glycolysis/Gluconeogenesis	Pyruvate metabolism	1.2.4.1	1150686443	pyruvate dehydrogenase E1 component subunit alpha, mitochondrial [Asparagus officinalis]	Pyruvate DH E1	136.04	42	18	184	6	324	35.9	6.99	495.79	18	0.597	0.44	0.737	0.955272	0.893591	0.619519	4.29	24.8	4.44	146	89.8	64.2	4.36	26.21	32.54	High	High	High	High	High	High	High	High	High	High	Peak Found	High	Peak Found	High	High	High	High	High	High
Glycolysis/Gluconeogenesis	Pyruvate metabolism	1.2.4.1	1150744371	pyruvate dehydrogenase E1 component subunit beta-1, mitochondrial-like [Asparagus officinalis]	Pyruvate DH E1	81.881	42	10	135	6	369	39.6	5.63	384.01	10	0.503	0.481	0.995	0.895003	0.893591	0.995088	6.03	5.21	11.44	142.5	81.9	75.6	10.08	11.09	17.62	High	High	High	High	High	High	High	High	High	High	Peak Found	High	High	High	High	High	High	High	Peak Found
Glycolysis/Gluconeogenesis	Pyruvate metabolism	1.2.4.1	1150684807	pyruvate dehydrogenase E1 component subunit beta-1, mitochondrial [Asparagus officinalis]	Pyruvate DH E1	61.9	28	8	111	4	378	40.6	5.49	309.56	8	1.376	1.246	0.907	0.934254	0.919199	0.92611	8.87	0.31	9.19	81.9	116.2	102	17.29	3.57	14.2	High	High	High	High	High	High	High	High	High	High	High	High	Peak Found	Peak Found	Peak Found	Peak Found	Peak Found	High	High
Glycolysis/Gluconeogenesis	Pyruvate metabolism	1.2.4.1	1150699921	LOW QUALITY PROTEIN: pyruvate dehydrogenase E1 component subunit alpha-3, chloroplastic [Asparagus officinalis]	Pyruvate DH E1	19.551	12	4	22	4	341	37.7	6.2	51.02	4	0.744	0.749	0.929	0.975174	0.987613	0.98317	11.42	7.48	18.33	131.5	81.8	86.7	11.97	21.09	31.27	High	High	High	High	High	High	High	High	High	Peak Found	Peak Found	Peak Found	Peak Found	Peak Found	Peak Found	High	High	Peak Found	Peak Found
Glycolysis/Gluconeogenesis	Pyruvate metabolism	2.7.1.40	1150684287	pyruvate kinase 1, cytosolic [Asparagus officinalis]	Pyruvate kinase	243.129	58	24	464	10	499	54.4	7.53	1063.12	24	0.41	0.428	1.141	0.731647	0.836032	0.946676	13.58	4.44	16.38	164.8	64.7	70.5	12.74	23.42	41.52	High	High	High	High	High	High	High	High	High	High	High	High	High	High	High	High	High	High	High
Glycolysis/Gluconeogenesis	Pyruvate metabolism	2.7.1.40	Q2RAK2	pyruvate kinase 1, cytosolic OS=Oryza sativa subsp. japonica OX=39947 GN=Os11g0148500 PE=1 SV=1	Pyruvate kinase	161.421	34	17	313	3	527	57.3	6.76	719.04	17	0.079	0.26	2.962	0.00444228	0.634641	0.0349004	15.49	36.44	59.06	221.7	15.3	63	11.08	28.95	45.87	High	High	High	High	High	High	High	High	High	Peak Found	Peak Found	Peak Found	Peak Found	Not Found	Not Found	Peak Found	Peak Found	Peak Found	Not Found
Glycolysis/Gluconeogenesis	Pyruvate metabolism	2.7.1.40	1150729147	LOW QUALITY PROTEIN: pyruvate kinase, cytosolic isozyme [Asparagus officinalis]	Pyruvate kinase	158.58	42	18	194	18	505	54.6	8.13	595.99	18	0.522	0.467	0.896	0.912974	0.875739	0.921527	30.49	19.81	6.31	156.9	75.5	67.6	16.42	37.16	32.03	High	High	High	High	High	High	High	High	High	High	High	High	High	High	High	High	High	High	High
Glycolysis/Gluconeogenesis	Pyruvate metabolism	2.7.1.40	1150677770	pyruvate kinase, cytosolic isozyme [Asparagus officinalis]	Pyruvate kinase	100.4	34	19	188	12	510	55.2	8.05	376.84	19	0.376	0.32	0.85	0.654351	0.622336	0.909623	10.13	32.89	24.42	176.9	66.5	56.6	5.88	15.16	33.57	High	High	High	High	High	High	High	High	High	High	High	High	High	High	High	High	High	High	High
Glycolysis/Gluconeogenesis	Pyruvate metabolism	2.7.1.40	1150747081	LOW QUALITY PROTEIN: pyruvate kinase, cytosolic isozyme-like [Asparagus officinalis]	Pyruvate kinase	92.009	33	15	177	8	451	49.2	8.05	418.69	15	0.538	0.6	1.256	0.931248	0.934163	0.891624	23.88	5.05	16.56	140.4	75.5	84.2	18.84	35.37	49.32	High	High	High	High	High	High	High	High	High	High	High	High	Peak Found	Peak Found	Peak Found	High	High	High	Peak Found
Glycolysis/Gluconeogenesis	Pyruvate metabolism	2.7.1.40	1150690249	pyruvate kinase isozyme A, chloroplastic [Asparagus officinalis]	Pyruvate kinase	41.473	27	8	48	8	449	49.8	5.34	92.8	8	0.404	0.49	1.162	0.84894	0.919359	0.962595	2.07	17.25	27.13	157.1	62.5	80.4	9.05	11.74	18.4	High	High	High	High	High	High	High	High	High	High	High	High	Peak Found	Peak Found	Peak Found	High	Peak Found	High	High
Glycolysis/Gluconeogenesis	Pyruvate metabolism	2.7.1.40	1150708907	plastidial pyruvate kinase 2 [Asparagus officinalis]	Pyruvate kinase	37.07	21	6	22	5	572	62.7	6.74	45.18	6	0.467	1.042	1.748	0.940913	0.975448	0.447153	36.28	25.17	31.09	130	48.8	121.2	16.12	48.18	24.65	Peak Found	High	High	High	High	High	Peak Found	High	High	Peak Found	Peak Found	Peak Found	Peak Found	Peak Found	Peak Found	Peak Found	Peak Found	High	High
Glycolysis/Gluconeogenesis	Pyruvate metabolism	2.7.1.40	1150743723	pyruvate kinase 1, cytosolic-like [Asparagus officinalis]	Pyruvate kinase	34.471	15	7	107	3	525	57.2	8.06	164.52	7	0.206	0.234	1.275	0.655998	0.838301	0.916613	18.24	64.85	8.24	209.5	41.5	49	11.32	40.66	65.36	High	Peak Found	High	High	High	Peak Found	High	High	High	Peak Found	Not Found	Peak Found	Not Found	Not Found	Peak Found	Peak Found	Peak Found	Peak Found	Not Found
Glycolysis/Gluconeogenesis	Pyruvate metabolism	2.7.1.40	Q42806	pyruvate kinase, cytosolic isozyme OS=Glycine max OX=3847 PE=2 SV=1	Pyruvate kinase	34.041	13	7	102	1	511	55.3	7.56	214.81	7	0.439	0.389	1.023	0.900326	0.901038	0.995088	0.78	34.69	20.55	163.9	72.3	63.8	14.7	29.81	57.48	High	High	High	High	High	High	High	High	High	High	High	High	High	Peak Found	Peak Found	High	High	High	Peak Found
Glycolysis/Gluconeogenesis	Pyruvate metabolism	2.7.1.40	1150700991	pyruvate kinase isozyme G, chloroplastic [Asparagus officinalis]	Pyruvate kinase	6.798	8	2	2	1	465	51.3	6.15	2.2	2	0.632	0.335	0.529	0.993913	0.912418	0.667747	11.35	81.79	47.68	131.4	110.2	58.3	18.3	25.56	63.93	Peak Found	Peak Found	Not Found	High	Peak Found	Not Found	Peak Found	Peak Found	Peak Found	Not Found	Not Found	Not Found	Not Found	Peak Found	Not Found	Not Found	Not Found	Peak Found	Not Found
Glycolysis/Gluconeogenesis	Pyruvate metabolism	4.1.1.49	1150697640	phosphoenolpyruvate carboxykinase (ATP) [Asparagus officinalis]	PEP carboxykinase	85.562	24	11	69	9	689	75.8	6.92	133	11	0.399	0.427	1.093	0.825417	0.893591	0.973008	17.33	13.79	3.17	146.3	74.3	79.4	15.96	35.95	37.89	High	High	High	High	High	High	High	High	High	Peak Found	Peak Found	Peak Found	High	High	High	High	High	High	Peak Found
Glycolysis/Gluconeogenesis	Pyruvate metabolism	4.1.1.49	Q9T074	Phosphoenolpyruvate carboxykinase (ATP) OS=Arabidopsis thaliana OX=3702 GN=PCKA PE=1 SV=1	PEP carboxykinase	11.371	6	3	10	1	671	73.4	7.08	8.9	3	0.264	0.249	0.938	0.880738	0.897349	0.995825	0.79	53.69	54.19	193.1	51	55.8	12.9	50.21	76.92	High	High	High	Peak Found	Peak Found	Peak Found	Peak Found	Peak Found	Peak Found	Not Found	Not Found	Not Found	Not Found	Not Found	Not Found	Not Found	Not Found	Not Found	Not Found
Glycolysis/Gluconeogenesis	Pyruvate metabolism	4.1.1.31	1150706382	phosphoenolpyruvate carboxylase 2 [Asparagus officinalis]	PEP carboxylase	318.618	34	31	486	5	966	110.1	6.52	1405.55	31	0.156	0.118	0.637	0.094584	0.110911	0.745564	12.95	32.1	17.22	234.7	35.7	29.6	4.85	17.74	26.71	High	High	High	High	High	High	High	High	High	High	Peak Found	Peak Found	Peak Found	Not Found	Peak Found	Peak Found	Peak Found	Peak Found	Peak Found
Glycolysis/Gluconeogenesis	Pyruvate metabolism	4.1.1.31	1150676669	phosphoenolpyruvate carboxylase 2 [Asparagus officinalis]	PEP carboxylase	318.552	36	37	562	7	965	110	6.62	1491.16	37	0.19	0.127	0.806	0.0816293	0.0348195	0.916613	8.53	11.11	44.61	229.3	43.6	27	10.2	22.19	65.87	High	High	High	High	High	High	High	High	High	High	High	High	High	High	Peak Found	High	High	High	High
Glycolysis/Gluconeogenesis	Pyruvate metabolism	4.1.1.31	P29194	phosphoenolpyruvate carboxylase 2 OS=Sorghum bicolor OX=4558 PE=3 SV=1	PEP carboxylase	268.611	24	27	570	1	960	109.5	6.04	1563.99	27	0.835	0.462	0.466	0.996275	0.905257	0.0112419	18.07	4.71	23.45	136	113.6	50.3	22.89	3.7	18.44	High	High	Peak Found	Peak Found	Peak Found	Peak Found	Peak Found	Peak Found	High	High	Peak Found	Peak Found	Peak Found	Peak Found	High	Peak Found	Peak Found	Peak Found	Peak Found
Glycolysis/Gluconeogenesis	Pyruvate metabolism	4.1.1.31	P16097	phosphoenolpyruvate carboxylase 2 OS=Mesembryanthemum crystallinum OX=3544 GN=PPC2 PE=3 SV=1	PEP carboxylase	251.887	26	27	461	1	960	109.1	5.86	1262.99	27	2.892	2.684	0.928	0.602286	0.739352	0.974307	35.84	4.28	17.88	61.6	116	122.4	49.65	28.65	33.32	High	Peak Found	High	High	High	High	High	High	High	High	High	High	Peak Found	Peak Found	Peak Found	High	High	High	High
Glycolysis/Gluconeogenesis	Pyruvate metabolism	4.1.1.31	Q5GM68	phosphoenolpyruvate carboxylase 2 OS=Arabidopsis thaliana OX=3702 GN=PPC2 PE=1 SV=2	PEP carboxylase	245.653	20	25	424	2	963	109.7	5.8	1175.46	25	0.192	0.089	0.654	0.12022	0.0110551	0.707342	41.32	51.8	60.27	248.7	34.8	16.5	17.94	52.61	110.11	High	High	High	High	High	High	High	High	High	Peak Found	Peak Found	Peak Found	Peak Found	High	Peak Found	High	High	High	Peak Found
Glycolysis/Gluconeogenesis	Pyruvate metabolism	4.1.1.31	P29196	phosphoenolpyruvate carboxylase OS=Solanum tuberosum OX=4113 GN=PPC1 PE=2 SV=2	PEP carboxylase	218.806	23	26	450	1	965	110.2	5.77	1135.9	26	0.341	0.276	0.664	0.698813	0.704635	0.697661	23.16	32.73	15.96	184.2	69.6	46.2	10.28	17.03	65.17	High	High	High	High	High	High	High	High	High	High	Peak Found	Peak Found	High	High	Peak Found	High	High	High	Peak Found
Glycolysis/Gluconeogenesis	Pyruvate metabolism	4.1.1.31	P51059	phosphoenolpyruvate carboxylase 2 OS=Zea mays OX=4577 GN=PEP4 PE=2 SV=1	PEP carboxylase	218.546	23	23	491	1	967	109.9	6.04	1265.37	23	0.265	0.223	0.995	0.81391	0.846089	0.995088	8.04	26.33	36.93	199.5	55.9	44.6	9.65	26.05	68.38	High	Peak Found	Peak Found	Peak Found	High	High	Peak Found	High	High	Peak Found	Peak Found	Peak Found	Peak Found	Peak Found	Peak Found	Peak Found	Not Found	Peak Found	Peak Found
Glycolysis/Gluconeogenesis	Pyruvate metabolism	4.1.1.31	Q01647	phosphoenolpyruvate carboxylase OS=Flaveria pringlei OX=4226 GN=PPCA1 PE=1 SV=1	PEP carboxylase	196.965	25	27	376	2	967	110.6	6.18	917.74	27	1.419	0.785	0.667	0.947558	0.993047	0.450813	7.71	50.96	38.24	97	126.5	76.4	4.89	11.83	46.32	Peak Found	High	Peak Found	High	High	Peak Found	High	High	High	Peak Found	Peak Found	High	High	High	Peak Found	Peak Found	Peak Found	High	Peak Found
Glycolysis/Gluconeogenesis	Pyruvate metabolism	4.1.1.31	Q9FV65	phosphoenolpyruvate carboxylase 2 OS=Flaveria trinervia OX=4227 GN=PPCC PE=1 SV=1	PEP carboxylase	168.45	21	25	330	1	967	110.6	6.18	774.7	25	0.055	0.053	0.675	0.0189578	0.162459		3.45	34.94	71.42	268.7	17.8	13.6	14.4	15.23	75.91	High	High	High	High	High	High	High	High	High	Not Found	Not Found	Not Found	Not Found	Not Found	Not Found	Not Found	Not Found	Not Found	Not Found
Glycolysis/Gluconeogenesis	Pyruvate metabolism	4.1.1.31	Q02735	phosphoenolpyruvate carboxylase OS=Medicago sativa OX=3879 GN=PEPC PE=2 SV=1	PEP carboxylase	148.676	18	18	317	2	966	110.8	6.24	817.41	18	1.136	1.544	1.326	0.95983	0.905257	0.881608	18.92	12.15	16.16	78	95.4	126.6	14.3	49.21	6.62	Peak Found	Peak Found	High	Peak Found	Peak Found	High	Peak Found	Peak Found	High	Peak Found	Peak Found	Peak Found	Peak Found	High	High	Peak Found	High	Peak Found	Peak Found
Glycolysis/Gluconeogenesis	Pyruvate metabolism	4.1.1.31	P29193	phosphoenolpyruvate carboxylase, housekeeping isozyme OS=Saccharum hybrid OX=15819 PE=3 SV=1	PEP carboxylase	138.65	18	16	222	1	966	110.2	6.13	561.11	16	0.485	0.745	1.537	0.959365	0.983932	0.83898	17.01	29.53	133.97	120	70.9	109.1	23.06	126.6	32.56	Not Found	Not Found	Not Found	Not Found	Not Found	Not Found	Not Found	Not Found	Not Found	Not Found	Not Found	Not Found	Peak Found	Peak Found	Not Found	Peak Found	Not Found	Not Found	Not Found
Glycolysis/Gluconeogenesis	Pyruvate metabolism	4.1.1.31	P04711	Phosphoenolpyruvate carboxylase 1 OS=Zea mays OX=4577 GN=PEP1 PE=1 SV=2	PEP carboxylase	13.696	5	5	47	2	970	109.2	6.1	52.67	5	1.519	0.745	0.743	0.904473	0.982884	0.916613	1.3	12.03	18.66	97.3	126	76.7	11.36	17.79	41.14	Peak Found	Peak Found	Peak Found	Peak Found	Peak Found	Peak Found	Peak Found	High	Peak Found	Peak Found	Peak Found	Peak Found	Peak Found	Peak Found	Peak Found	Peak Found	Peak Found	Peak Found	Peak Found
Glycolysis/Gluconeogenesis	Pyruvate metabolism		1150709979	phosphoenolpyruvate phosphatase-like [Asparagus officinalis]	PEP phosphatase	15.125	7	2	7	2	481	55.3	7.11	17.46	2	0.208	0.144	0.72	0.631101	0.675824	0.916613	5.91	6.2	70.88	213.8	50.1	36.1	16.9	12.19	46.19	High	High	High	Peak Found	High	Peak Found	High	High	Peak Found	Peak Found	Peak Found	Not Found	Not Found	Peak Found	Not Found	Peak Found	Not Found	Peak Found	Peak Found
Glycolysis/Gluconeogenesis	Pyruvate metabolism	2.3.1.12	1150732552	dihydrolipoyllysine-residue acetyltransferase component 2 of pyruvate dehydrogenase complex, mitochondrial-like [Asparagus officinalis]	Pyruvate DH DPAT	155.421	39	18	194	15	592	63.9	5.29	499.74	18	1.165	1.115	0.957	0.958943	0.953788	0.972144	2.13	0.69	1.43	90.8	107.4	101.8	7.61	19.57	15.09	High	High	High	High	High	High	High	High	High	High	High	High	High	High	High	High	High	High	High
Glycolysis/Gluconeogenesis	Pyruvate metabolism	2.3.1.12	1150701447	dihydrolipoyllysine-residue acetyltransferase component 3 of pyruvate dehydrogenase complex, mitochondrial-like [Asparagus officinalis]	Pyruvate DH DPAT	153.265	40	19	187	11	561	60.7	6.87	498.17	19	0.661	0.622	0.982	0.952529	0.949627	0.990161	0.64	4.91	2.71	129	85.6	85.4	7.2	11.07	9.98	High	High	High	High	High	High	High	High	High	High	High	High	High	High	High	High	High	High	High
Glycolysis/Gluconeogenesis	Pyruvate metabolism	2.3.1.12	1150747847	dihydrolipoyllysine-residue acetyltransferase component 2 of pyruvate dehydrogenase complex, mitochondrial-like isoform X1 [Asparagus officinalis]	Pyruvate DH DPAT	122.668	28	15	163	8	555	59.7	7.83	445.52	15	1.372	3.233	2.356	0.945828	0.282383	0.00758472	23.15	52.11	18.72	53.4	73.5	173.1	10.36	30.01	46.99	High	High	High	High	High	High	High	High	High	High	High	High	High	High	High	High	High	High	High
Glycolysis/Gluconeogenesis	Pyruvate metabolism	2.3.1.12	1150739712	dihydrolipoyllysine-residue acetyltransferase component 1 of pyruvate dehydrogenase complex, mitochondrial [Asparagus officinalis]	Pyruvate DH DPAT	43.048	19	7	36	7	515	55.9	8.82	102.01	7	0.47	0.2	0.44	0.901008	0.292264	0.0139091	5	26.54	14.19	178.8	85.4	35.7	1.61	19.83	32.83	High	High	High	High	High	High	High	High	High	High	Peak Found	High	Peak Found	High	High	Peak Found	Peak Found	High	Peak Found
Glycolysis/Gluconeogenesis	Pyruvate metabolism	2.3.1.12	Q9SQI8	pihydrolipoyllysine-residue acetyltransferase component 4 of pyruvate dehydrogenase complex, chloroplastic OS=Arabidopsis thaliana OX=3702 GN=LTA2 PE=2 SV=1	Pyruvate DH DPAT	12.259	5	2	33	2	480	50	8.37	80.85	2	0.778	0.476	0.563	0.986803	0.920051	0.378321	4.67	12.95	5.37	132.2	104.8	63	9.5	15.34	12.93	High	High	High	High	High	High	High	High	High	High	High	High	High	High	High	High	High	High	High
Glycolysis/Gluconeogenesis	Pyruvate metabolism	2.3.1.12	1150743651	dihydrolipoyllysine-residue acetyltransferase component 5 of pyruvate dehydrogenase complex, chloroplastic [Asparagus officinalis]	Pyruvate DH DPAT	12.039	13	2	7	2	214	23.1	9.19	10.58	2	0.391	0.51	1.304	0.822576	0.929358	0.916613	13.92	3.49	17.82	157.8	61.7	80.5	7.42	32.47	4.52	Peak Found	High	High	Peak Found	Peak Found	Peak Found	Peak Found	Peak Found	Peak Found	High	Peak Found	Peak Found	High	High	Peak Found	High	Peak Found	Peak Found	Peak Found
Glycolysis/Gluconeogenesis	Pyruvate metabolism	1.1.1.237	1150673861	hydroxyphenylpyruvate reductase-like [Asparagus officinalis]	HPP reductase	40.403	30	6	73	4	182	19.5	6.54	165.98	6	0.387	0.456	1.1	0.698089	0.889116	0.957611	10.52	36.78	10.31	160.5	64.1	75.4	3.15	20.89	30.55	High	High	High	High	High	High	High	High	High	Peak Found	Peak Found	Peak Found	Peak Found	Peak Found	Peak Found	High	Peak Found	High	Peak Found
Glycolysis/Gluconeogenesis	Pyruvate metabolism	1.1.1.237	Q65CJ7	hydroxyphenylpyruvate reductase OS=Plectranthus scutellarioides OX=4142 GN=HPPR PE=1 SV=2	HPP reductase	7.356	8	3	46	1	313	34.1	5.47	63.96	3	0.409	0.162	0.359	0.904355	0.671538	0.154543	26.44	20.11	4.46	191.2	77.8	31	1.89	36.41	28.99	High	High	High	High	High	High	High	High	High	Peak Found	Peak Found	High	Peak Found	Peak Found	High	High	High	High	Peak Found
Glycolysis/Gluconeogenesis	Pyruvate metabolism	1.1.1.37	1150706797	malate dehydrogenase, mitochondrial [Asparagus officinalis]	MDH	338.383	54	16	358	14	346	36.2	8.88	1491.32	16	0.868	0.695	0.81	0.996716	0.968937	0.833308	1.48	21.22	19.95	112.9	101.9	85.2	5.29	3.61	16.68	High	High	High	High	High	High	High	High	High	High	High	High	High	High	High	High	High	High	High
Glycolysis/Gluconeogenesis	Pyruvate metabolism	1.1.1.37	1150669654	malate dehydrogenase [Asparagus officinalis]	MDH	227.673	57	19	561	7	332	35.7	6.79	1615.22	19	0.847	1.033	1.197	0.993913	0.966238	0.916613	15.37	4.95	2.14	103.6	87.8	108.6	4.99	9.47	2.93	High	High	High	High	High	High	High	High	High	High	High	High	High	High	High	High	High	High	High
Glycolysis/Gluconeogenesis	Pyruvate metabolism	1.1.1.37	1150733644	malate dehydrogenase, chloroplastic-like [Asparagus officinalis]	MDH	49.532	29	8	64	6	412	43.1	8.32	180.56	8	0.647	0.801	1.262	0.959365	0.999557	0.807088	3.36	9.73	0.49	108.9	84.5	106.6	18.49	15.28	11.84	High	High	High	High	High	High	High	High	High	High	Peak Found	High	High	High	High	High	High	Peak Found	High
Glycolysis/Gluconeogenesis	Pyruvate metabolism	1.1.1.37	1150723652	malate dehydrogenase, glyoxysomal-like [Asparagus officinalis]	MDH	18.416	7	2	18	2	433	46.9	5.25	43.12	2	0.486	0.424	0.843	0.940913	0.919199	0.924157	1.02	24.44	24.74	155.8	78.3	66	5.94	5.64	13.58	High	High	High	High	High	High	High	High	High	Peak Found	Peak Found	Peak Found	High	Peak Found	High	Peak Found	High	Peak Found	Peak Found
Other	Sugar phosphorylation/dephosphorylation	2.7.1.1	1150671046	hexokinase-2, chloroplastic isoform X1 [Asparagus officinalis]	Hexokinase	7.86	5	2	5	1	428	46.5	6.02	4.19	2	0.244	0.224	1.489	0.852226	0.875739	0.83438	14.49	63.44	35.36	196.8	44.4	58.8	24.26	9.72	44.7	Peak Found	High	High	High	High	Peak Found	Peak Found	Peak Found	Peak Found	Peak Found	Peak Found	Peak Found	Not Found	Not Found	Peak Found	Peak Found	Not Found	Peak Found	Not Found
Other	Sugar phosphorylation/dephosphorylation	2.7.1.1	1150708516	hexokinase-2-like [Asparagus officinalis]	Hexokinase	134.987	51	16	154	12	435	47.2	5.92	416.14	16	0.815	1.076	1.32	0.991757	0.962593	0.801183	0.03	3.96	3.93	104	84.2	111.9	2.65	8.48	12.7	High	High	High	High	High	High	High	High	High	High	High	High	High	High	High	High	High	High	High
Other	Sugar phosphorylation/dephosphorylation	2.7.1.1	1150674278	hexokinase-2-like, partial [Asparagus officinalis]	Hexokinase	33.286	21	5	31	4	409	44.8	6.02	93.15	5	0.831	0.782	0.999	0.993431	0.999557	0.995088	22.49	12.62	9.09	106.7	96.7	96.6	16.93	12.37	24.96	High	High	Peak Found	Peak Found	Peak Found	Peak Found	Peak Found	High	Peak Found	High	High	Peak Found	Peak Found	Peak Found	High	High	High	High	Peak Found
Other	Sugar phosphorylation/dephosphorylation	2.7.1.1	1150726908	hexokinase-3-like [Asparagus officinalis]	Hexokinase	10.109	6	2	9	1	500	54.3	6.06	12.42	2	0.902	0.766	0.733	0.987812	0.985953	0.916613	20.38	33.85	9.13	112.4	101.5	86.1	12.44	36.97	12.56	Peak Found	Peak Found	High	Peak Found	Peak Found	Peak Found	Peak Found	High	High	Not Found	Not Found	Not Found	Peak Found	Not Found	Peak Found	Peak Found	Peak Found	Peak Found	Peak Found
Other	Sugar phosphorylation/dephosphorylation	2.7.1.1	1150676300	LOW QUALITY PROTEIN: hexokinase-2-like [Asparagus officinalis]	Hexokinase	47.621	22	7	52	3	492	53.4	7.52	136.52	7	0.454	0.261	0.6	0.940913	0.864568	0.671452	6.5	3.99	10.66	172.9	79.5	47.7	11.81	17.98	30.58	High	High	High	High	High	High	High	High	High	High	Peak Found	High	Not Found	Peak Found	Peak Found	Peak Found	High	High	Peak Found
Other	Sugar transport		1150714014	LOW QUALITY PROTEIN: sugar transporter ERD6-like 6 [Asparagus officinalis]	SUT ERD6	25.303	10	4	17	4	461	49.5	8.66	41.58	4	0.318	0.498	0.758	0.674071	0.92384	0.916613	30.44	0.47	8.33	170.3	44.9	84.8	12.93	59.31	46.81	High	High	High	High	High	High	Peak Found	High	Peak Found	Peak Found	Peak Found	Peak Found	High	High	High	Peak Found	Peak Found	Peak Found	High
Other	Lectin		1150731289	mannose-specific lectin-like [Asparagus officinalis]	Mannose lectin	77.518	40	3	94	3	151	16.3	4.59	381.46	3	1.8	0.736	0.409	0.803841	0.98003	0.00214758	18.5	10.64	47.69	89.9	141.6	68.6	24.3	13.7	67.49	High	High	High	High	High	High	High	High	High	High	High	High	High	High	High	High	High	High	High
Other	Lectin		1150731287	mannose-specific lectin-like [Asparagus officinalis]	Mannose lectin	63.125	31	4	62	4	172	19.4	8.81	190.29	4	1.397	1.199	1.22	0.940913	0.934163	0.916613	21.76	18.34	45.5	72.8	96.8	130.4	39.37	46.55	27.37	High	High	High	High	High	High	High	High	High	High	High	High	High	High	High	High	High	High	High
Pentose phosphate pathway	Pentose phosphate pathway	2.7.1.11	1150708478	ATP-dependent 6-phosphofructokinase 6-like [Asparagus officinalis]	6-PFK (ATP)	130.409	44	19	196	12	557	61.3	7.08	481.15	19	0.667	0.685	1.033	0.955272	0.966238	0.99536	19.87	16.46	0.77	127.6	85	87.4	19.04	38.42	32.19	High	High	High	High	High	High	High	High	High	Peak Found	Peak Found	Peak Found	High	High	High	High	High	High	High
Pentose phosphate pathway	Pentose phosphate pathway	2.7.1.11	1150676323	ATP-dependent 6-phosphofructokinase 6-like [Asparagus officinalis]	6-PFK (ATP)	64.056	19	8	101	1	506	55.2	6.86	250.49	8	0.357	0.862	2.414	0.948496	0.982884	0.24743	25.11	17.86	38.35	135.3	48.2	116.5	24.86	22.61	38.93	Peak Found	Peak Found	Peak Found	Peak Found	Peak Found	Peak Found	High	High	High	Peak Found	Peak Found	Not Found	Not Found	Not Found	Peak Found	Not Found	Not Found	Peak Found	Peak Found
Pentose phosphate pathway	Pentose phosphate pathway	4.1.2.13	1150698841	fructose-bisphosphate aldolase 1, cytoplasmic [Asparagus officinalis]	FBP aldolase	640.902	79	36	2038	4	358	38.6	8.06	6154.73	36	0.104	0.057	0.55	0.00361802	0.000338793	0.0917153	0.25	38.85	7.9	258.5	26.8	14.7	24.43	38.12	61.37	High	High	High	High	High	High	High	High	High	High	Peak Found	High	High	High	High	High	High	High	High
Pentose phosphate pathway	Pentose phosphate pathway	4.1.2.13	1150746308	LOW QUALITY PROTEIN: fructose-bisphosphate aldolase 1, cytoplasmic-like [Asparagus officinalis]	FBP aldolase	609.32	79	36	1965	4	358	38.5	8.1	5886.14	36	0.107	0.032	0.446	0.00444228	3.60608e-06	0.00837654	16.6	53.36	19.43	263.4	28.2	8.5	19.02	50.78	62.97	High	High	High	High	High	High	High	High	High	High	High	High	High	High	High	High	High	High	High
Pentose phosphate pathway	Pentose phosphate pathway	4.1.2.13	1150680937	fructose-bisphosphate aldolase 1, chloroplastic-like [Asparagus officinalis]	FBP aldolase	101.787	42	14	172	8	391	42.4	6.8	435.16	14	1.07	1.61	1.762	0.967341	0.860724	0.176893	2.52	7.54	3.78	82.9	90.3	126.7	8.66	16.73	20.57	High	High	High	High	High	High	High	High	High	High	High	High	High	High	High	High	High	High	High
Pentose phosphate pathway	Pentose phosphate pathway	4.1.2.13	P08440	fructose-bisphosphate aldolase, cytoplasmic isozyme OS=Zea mays OX=4577 PE=2 SV=1	FBP aldolase	62.761	24	9	380	4	355	38.6	7.61	1116.07	9	7.115	7.558	1.062	0.00576738	0.0130262	0.990161	14.75	30.4	17.38	20.7	140.1	139.3	31.76	18.39	8.89	Peak Found	Peak Found	Peak Found	Peak Found	Peak Found	Peak Found	Peak Found	Peak Found	Peak Found	High	High	Peak Found	High	Peak Found	High	Peak Found	Peak Found	Peak Found	High
Pentose phosphate pathway	Pentose phosphate pathway	4.1.2.13	1150718223	fructose-bisphosphate aldolase 3, chloroplastic [Asparagus officinalis]	FBP aldolase	46.348	30	8	84	2	370	40.3	8.51	169.7	8	1.842	2.318	1.421	0.894473	0.794318	0.589201	28.89	2.85	19.49	57.7	106.3	136	9.72	13.15	8.22	High	Peak Found	High	Peak Found	Peak Found	High	High	Peak Found	Peak Found	Peak Found	High	High	High	High	High	High	High	High	High
Pentose phosphate pathway	Pentose phosphate pathway	4.1.2.13	1150716761	fructose-1,6-bisphosphatase, chloroplastic isoform X1 [Asparagus officinalis]	FBP aldolase	9.609	7	2	3	2	373	40.9	7.3	6.31	2	0.68	0.947	1.668	0.994359	0.966238	0.696826	9.64	32.61	43.56	116.5	73.1	110.3	19.41	32.7	13.53	High	Peak Found	High	Peak Found	Peak Found	Peak Found	Peak Found	Peak Found	High	Peak Found	Peak Found	Peak Found	Not Found	Peak Found	Not Found	Not Found	Peak Found	Peak Found	Peak Found
Pentose phosphate pathway	Pentose phosphate pathway	4.1.2.13	Q01517	fructose-bisphosphate aldolase 2, chloroplastic OS=Pisum sativum OX=3888 PE=1 SV=2	FBP aldolase	3.897	5	2	31	1	349	37.8	5.59	57.78	2	1.15	1.577	1.371	0.959365	0.905257	0.83898	18.95	13.74	5.98	80.5	92.6	126.9	5.35	16.84	7.93	Peak Found	Peak Found	Peak Found	Peak Found	Peak Found	Peak Found	Peak Found	Peak Found	Peak Found	High	Peak Found	Peak Found	High	High	Peak Found	Peak Found	Peak Found	Peak Found	Peak Found
Pentose phosphate pathway	Pentose phosphate pathway	1.1.1.44 and 1.1.1.343	1150699637	6-phosphogluconate dehydrogenase, decarboxylating 1 [Asparagus officinalis]	6-PGDH	181.8	55	23	228	8	482	53	6.25	617.77	23	0.234	0.255	1.112	0.32527	0.588079	0.961683	2.89	29.91	8.21	200.6	48.2	51.2	4.99	10.37	20.8	High	High	High	High	High	High	High	High	High	Peak Found	Peak Found	Peak Found	Peak Found	Peak Found	Peak Found	High	Peak Found	Peak Found	Peak Found
Pentose phosphate pathway	Pentose phosphate pathway	1.1.1.44 and 1.1.1.343	1150747293	LOW QUALITY PROTEIN: 6-phosphogluconate dehydrogenase, decarboxylating 3-like [Asparagus officinalis]	6-PGDH	166.039	56	23	244	8	473	52	6.92	650.69	23	0.345	0.373	1.016	0.631101	0.794318	0.99536	3.46	13.8	0.35	175.1	61.9	62.9	15.36	14.18	33.34	High	High	High	High	High	High	High	High	High	Peak Found	High	Peak Found	Peak Found	Peak Found	Peak Found	High	Peak Found	High	Peak Found
Pentose phosphate pathway	Pentose phosphate pathway	1.1.1.44 and 1.1.1.343	1150684607	LOW QUALITY PROTEIN: 6-phosphogluconate dehydrogenase, decarboxylating 2, chloroplastic-like [Asparagus officinalis]	6-PGDH	113.932	37	15	200	10	471	51.7	6.38	418.27	15	0.771	1.052	1.311	0.976475	0.966091	0.807088	6.23	5.86	5.06	105.7	84.1	110.2	6.44	4.48	1.66	High	High	High	High	High	High	High	High	High	High	High	High	High	High	High	High	High	High	High
Pentose phosphate pathway	Pentose phosphate pathway	1.1.1.44 and 1.1.1.343	Q9FFR3	6-phosphogluconate dehydrogenase, decarboxylating 3, chloroplastic OS=Arabidopsis thaliana OX=3702 GN=PGD3 PE=1 SV=1	6-PGDH	44.386	22	8	69	3	487	53.3	5.8	157.13	8	0.34	0.54	1.588	0.940913	0.98003	0.800028	49.66	11.4	66.14	149.8	62.6	87.6	30.92	37.22	58.55	High	High	High	High	Peak Found	High	High	High	High	High	High	Peak Found	High	High	High	High	High	High	High
Pentose phosphate pathway	Pentose phosphate pathway	1.1.1.44 and 1.1.1.343	Q2R480	6-phosphogluconate dehydrogenase, decarboxylating 2, chloroplastic OS=Oryza sativa subsp. japonica OX=39947 GN=G6PGH2 PE=2 SV=1	6-PGDH	22.406	10	4	36	1	508	54.3	6.47	48.68	4	1.533	2.651	1.73	0.898021	0.734853	0.664685	6.35	32.15	36.92	66.3	86.8	146.9	10.97	12.61	47.32	Peak Found	Not Found	Peak Found	Not Found	Peak Found	Not Found	Not Found	Not Found	Peak Found	Peak Found	Not Found	Peak Found	Not Found	Not Found	Not Found	Not Found	Not Found	Not Found	Not Found
Pentose phosphate pathway	Pentose phosphate pathway	1.1.1.49 and 1.1.1.363	1150684453	LOW QUALITY PROTEIN: glucose-6-phosphate 1-dehydrogenase, cytoplasmic isoform [Asparagus officinalis]	G6PDH	170.446	45	23	278	18	543	61.9	6.38	609.72	23	0.569	0.662	1.163	0.940913	0.962593	0.924157	3.72	34.59	27.67	139.9	77.7	82.4	7.57	11.03	29.01	High	High	High	High	High	High	High	High	High	High	High	High	High	High	High	High	High	High	High
Pentose phosphate pathway	Pentose phosphate pathway	1.1.1.49 and 1.1.1.363	P37830	glucose-6-phosphate 1-dehydrogenase, cytoplasmic isoform OS=Solanum tuberosum OX=4113 GN=G6PDH PE=2 SV=1	G6PDH	30.108	12	7	73	1	511	58.4	6.34	155.24	7	0.295	0.275	0.947	0.661076	0.807927	0.990161	5.36	36.77	2.53	210.9	45.7	43.3	27.09	28.89	43.79	High	High	High	High	High	High	High	High	High	Peak Found	Peak Found	Not Found	Peak Found	Peak Found	Peak Found	Peak Found	Peak Found	Peak Found	Peak Found
Pentose phosphate pathway	Pentose phosphate pathway	1.1.1.49 and 1.1.1.363	1150700563	glucose-6-phosphate 1-dehydrogenase, chloroplastic-like isoform X2 [Asparagus officinalis]	G6PDH	6.497	3	2	11	1	583	65.9	9.16	24.57	2	0.62	0.538	0.868	0.991268	0.98003	0.971938	2.97	83.35	56.7	143	86.9	70.1	7.4	28.08	79.57	High	High	Peak Found	Peak Found	Peak Found	High	Peak Found	High	High	Peak Found	Peak Found	Peak Found	Peak Found	Peak Found	Peak Found	Peak Found	Peak Found	Peak Found	Peak Found
Pentose phosphate pathway	Pentose phosphate pathway	5.3.1.9	1150690489	glucose-6-phosphate isomerase, cytosolic [Asparagus officinalis]	G6PDH	150.009	41	20	291	18	567	62.6	7.59	732.92	20	1.903	1.703	0.881	0.748792	0.818237	0.916613	12.19	2.28	9.72	64.4	122.5	113.2	14.07	23.91	11.57	High	High	High	High	High	High	High	High	High	High	High	High	High	High	High	High	High	High	High
Pentose phosphate pathway	Pentose phosphate pathway	5.3.1.9	1150689649	glucose-6-phosphate isomerase 1, chloroplastic [Asparagus officinalis]	G6PDH	61.73	18	11	74	11	672	74	6.89	172.52	11	0.864	0.859	1.016	0.996275	0.999557	0.99536	13.61	18.09	3.18	107.2	95	97.8	6.58	10.22	19.59	High	High	High	High	High	High	High	High	High	High	High	High	Peak Found	Peak Found	Peak Found	High	High	High	High
Pentose phosphate pathway	Pentose phosphate pathway	5.3.1.9	O82059	glucose-6-phosphate isomerase, cytosolic OS=Spinacia oleracea OX=3562 GN=PGIC PE=2 SV=2	G6PDH	15.723	10	3	26	1	566	62.1	6.83	61.34	3	4.326	3.248	0.851	0.350766	0.784855	0.936291	35.31	33.28	19.7	30.8	128.8	140.3	79.76	16.77	53.7	High	Not Found	High	Peak Found	High	Peak Found	Not Found	High	Peak Found	Peak Found	High	High	Peak Found	High	Peak Found	Peak Found	Not Found	Peak Found	High
Pentose phosphate pathway	Pentose phosphate pathway	2.7.1.17	1150690628	LOW QUALITY PROTEIN: xylulose kinase [Asparagus officinalis]	Xylulose kinase	16.143	8	5	36	5	564	62.1	6.62	56.35	5	1.025	0.985	0.961	0.964858	0.978307	0.987255	12.44	8.59	0.83	99.7	102.2	98.1	14.23	4.68	7.75	High	High	High	High	High	High	High	High	High	Peak Found	High	High	High	Peak Found	High	High	High	High	High
Pentose phosphate pathway	Pentose phosphate pathway	3.1.1.31	1150705744	probable 6-phosphogluconolactonase 4, chloroplastic [Asparagus officinalis]	6-PGL	220.659	67	13	287	11	264	29.1	5.11	946.77	13	1.302	0.948	0.795	0.949282	0.982884	0.801183	9.36	9.89	22.83	91.6	116.1	92.3	24.16	16.19	29.85	High	High	High	High	High	High	High	High	High	High	High	High	High	High	High	High	High	High	High
Pentose phosphate pathway	Pentose phosphate pathway	3.1.1.31	1150733241	probable 6-phosphogluconolactonase 4, chloroplastic [Asparagus officinalis]	6-PGL	23.369	16	5	39	3	324	34.9	8.1	58.6	5	1.26	1.268	1.006	0.949282	0.930055	0.998638	16.73	7.73	8.09	84	109.6	106.4	17.12	3.68	11.47	High	High	High	High	High	High	High	High	High	High	High	High	High	High	High	High	High	High	High
Pentose phosphate pathway	Pentose phosphate pathway	3.2.1.67	1150721160	probable polygalacturonase At1g80170 [Asparagus officinalis]	Polygalacturonase	26.461	12	3	12	3	449	48.6	7.81	36.79	3	0.432	0.187	0.429	0.872815	0.462083	0.163358	20.59	1.25	19.17	191.6	72.6	35.8	47.56	38.45	40.17	Peak Found	High	High	High	High	High	High	High	High	Peak Found	Peak Found	Peak Found	Peak Found	Peak Found	Peak Found	Peak Found	Peak Found	Peak Found	Peak Found
Pentose phosphate pathway	Pentose phosphate pathway	2.7.6.1	1150677390	ribose-phosphate pyrophosphokinase 4 [Asparagus officinalis]	Rp PPK	30.93	19	4	27	4	318	35.4	6.35	78.37	4	0.718	0.482	0.74	0.967259	0.927311	0.882899	11.92	9.41	8.23	133.4	102.1	64.5	5	11.4	15.23	High	High	High	High	High	High	High	High	High	Peak Found	Peak Found	Peak Found	Peak Found	Peak Found	Peak Found	Peak Found	Peak Found	High	Peak Found
Pentose phosphate pathway	Pentose phosphate pathway	5.3.1.1	1150732984	triosephosphate isomerase, chloroplastic [Asparagus officinalis]	TPI	76.678	32	9	105	8	323	34.4	7.66	296.06	9	0.448	0.406	1.008	0.813438	0.807193	0.995088	15.76	13.63	26.13	159.9	76.3	63.8	4.24	11.97	29.24	High	High	High	High	High	High	High	High	High	High	High	High	High	High	High	High	High	High	High
Pentose phosphate pathway	Pentose phosphate pathway	5.3.1.1	1150724791	triosephosphate isomerase, cytosolic [Asparagus officinalis]	TPI	284.834	85	21	483	12	253	27	6.09	1659.74	21	0.345	0.276	0.802	0.552442	0.471166	0.809784	1.41	47.39	62.26	191.7	66.7	41.6	21.67	14.7	57.06	High	High	High	High	High	High	High	High	High	High	High	High	Peak Found	High	High	High	High	High	High
Pentose phosphate pathway	Pentose phosphate pathway	5.3.1.1	1150713005	triosephosphate isomerase, cytosolic-like isoform X1 [Asparagus officinalis]	TPI	285.079	78	19	521	9	253	27	6.77	1822.53	19	0.904	0.678	0.75	0.997415	0.966238	0.664845	4.94	24.33	18.76	109.8	107.8	82.4	9	11.29	35.67	High	High	High	High	High	High	High	High	High	High	High	High	High	High	High	High	High	High	High
Pentose phosphate pathway	Pentose phosphate pathway	5.3.1.1	1150735938	triosephosphate isomerase, cytosolic-like isoform X1 [Asparagus officinalis]	UDP-g 6-DH	16.963	14	4	33	1	283	30.6	7.72	64.95	4	0.781	1.772	2.268	0.994359	0.860724	0.281397	131.67	66.13	112.15	102	48.8	149.2	42.5	147.39	70.39	High	Not Found	Not Found	High	High	High	Not Found	High	Not Found	Peak Found	Not Found	Not Found	Peak Found	Not Found	Peak Found	High	Not Found	Not Found	Not Found
Pentose phosphate pathway	Pentose phosphate pathway	1.1.1.22	Q9FM01	UDP-glucose 6-dehydrogenase 4 OS=Arabidopsis thaliana OX=3702 GN=UGD4 PE=1 SV=1	UDP-g 6-DH	24.992	15	5	60	2	480	53.1	5.85	96.52	5	0.476	0.747	1.145	0.949282	0.999557	0.972144	40.25	12.21	5.02	126	81.9	92.1	22.62	34.18	1.98	High	High	High	High	High	High	High	High	High	Peak Found	Peak Found	Peak Found	Peak Found	High	High	Peak Found	High	High	Peak Found
Starch and sucrose metabolism	Fructan metabolism	2.4.1.243	1150732172	6(G)-fructosyltransferase-like [Asparagus officinalis]	6G-FFT	312.358	41	24	722	21	624	68.8	5.3	2055.63	24	1.3	0.654	0.607	0.949282	0.961383	0.203028	3.99	1.94	1.79	96.8	125.9	77.3	18	4.98	15.42	High	High	High	High	High	High	High	High	High	High	High	High	High	High	High	High	High	High	High
Starch and sucrose metabolism	Fructan metabolism	2.4.1.243	1150733828	6(G)-fructosyltransferase-like [Asparagus officinalis]	6G-FFT	148.094	36	17	219	17	628	70	5.86	622.14	17	1.516	1.372	0.888	0.917842	0.905257	0.916613	7.53	4.49	7.57	79.7	112.5	107.8	29.15	26.14	26.02	High	High	High	High	High	High	High	High	High	High	High	High	High	High	High	High	High	High	High
Starch and sucrose metabolism	Fructan metabolism	2.4.1.243	Q5FC15	6(G)-fructosyltransferase OS=Asparagus officinalis OX=4686 GN=FT1 PE=1 SV=1	6G-FFT	64.238	22	10	119	8	610	68.3	5.8	236.47	10	0.998	0.724	0.728	0.97612	0.98003	0.607556	26.01	19.45	18.97	119	100.1	81	19.15	34.92	18.52	High	High	High	High	High	High	High	High	High	High	High	High	High	High	High	High	High	High	Peak Found
Starch and sucrose metabolism	Fructan metabolism	3.2.1.26	1150742863	beta-fructofuranosidase, insoluble isoenzyme 3-like [Asparagus officinalis]	ß-fru-furanosidase	95.94	30	14	95	13	575	65.1	8.66	247.91	14	0.133	0.076	0.571	0.0157229	0.00237068	0.48507	32.38	43.56	6.91	250.2	31.3	18.5	31.28	6.38	5.6	High	High	High	High	High	High	High	High	High	Peak Found	Peak Found	Peak Found	Peak Found	Peak Found	Peak Found	Peak Found	Peak Found	Peak Found	Not Found
Starch and sucrose metabolism	Fructan metabolism	3.2.1.26	1150684227	beta-fructofuranosidase, insoluble isoenzyme 3-like [Asparagus officinalis]	ß-fru-furanosidase	9.578	4	2	11	1	573	64.3	6.35	15.12	2	1.077	0.972	1.052	0.95983	0.966238	0.990161	25.77	21.05	39.89	93.5	100.7	105.9	23.9	12.91	15.39	High	High	High	High	Peak Found	High	Peak Found	High	High	Peak Found	Peak Found	Peak Found	Peak Found	Peak Found	Peak Found	Peak Found	Peak Found	Peak Found	Not Found
Starch and sucrose metabolism	Fructan metabolism	3.2.1…	1150746593	alkaline/neutral invertase CINV2-like [Asparagus officinalis]	Invertase CINV2	4.075	4	2	3	2	545	61.8	6.24	0	2	1.281	0.847	0.766	0.949282	0.982884	0.918093	7.09	48.27	35.74	100	113.2	86.8	18.96	14.43	20.37	High	Peak Found	Not Found	Not Found	High	Peak Found	Not Found	Not Found	Peak Found	Peak Found	Not Found	Peak Found	Peak Found	Peak Found	Peak Found	Peak Found	Not Found	Peak Found	Peak Found
Starch and sucrose metabolism	Sucrose metabolism	2.4.1.15 and 3.1.3.12	1150699954	alpha,alpha-trehalose-phosphate synthase [UDP-forming] 5-like [Asparagus officinalis]	α,α-THP synthase	17.219	5	3	18	3	864	97.9	5.8	39.15	3	0.468	0.262	0.561	0.940913	0.831895	0.568501	39.58	65.73	21.41	173.4	81.1	45.5	9.45	26.36	51.17	High	High	High	High	High	High	High	High	High	Peak Found	Peak Found	Peak Found	Peak Found	Peak Found	Peak Found	Peak Found	Peak Found	Peak Found	Peak Found
Starch and sucrose metabolism	Sucrose metabolism	2.4.1.15 and 3.1.3.12	1150692486	alpha,alpha-trehalose-phosphate synthase [UDP-forming] 6-like [Asparagus officinalis]	α,α-THP synthase	18.632	7	4	19	3	847	95.8	6.21	38.89	4	0.28	0.282	1.005	0.852226	0.901273	0.995088	4.94	33.35	23.19	184.8	56	59.1	14.03	8.07	30.9	High	High	High	High	High	High	High	High	High	Not Found	Not Found	Not Found	Not Found	Not Found	Not Found	Peak Found	Peak Found	Peak Found	Not Found
Starch and sucrose metabolism	Sucrose metabolism	2.4.1.15 and 3.1.3.12	1150672644	probable alpha,alpha-trehalose-phosphate synthase [UDP-forming] 7 [Asparagus officinalis]	α,α-THP synthase	22.13	5	3	47	1	887	99.1	5.66	105.01	3	1.261	1.527	1.211	0.949282	0.919199	0.918093	17.15	0.69	17.11	78	102.3	119.7	9.5	19.66	9.83	High	High	High	High	High	High	High	High	High	High	High	High	High	High	High	High	High	High	High
Starch and sucrose metabolism	Sucrose metabolism	2.4.1.15 and 3.1.3.12	1150669339	probable alpha,alpha-trehalose-phosphate synthase [UDP-forming] 7 [Asparagus officinalis]	α,α-THP synthase	9.269	5	3	11	1	885	99.3	5.87	16.42	3	0.904	1.213	1.305	0.97627	0.9214	0.916613	12.99	52.64	4.28	96.3	87	116.8	19.04	48.47	58.4	Peak Found	Peak Found	Peak Found	Peak Found	Peak Found	High	Peak Found	High	High	Peak Found	Peak Found	Not Found	Not Found	Peak Found	Peak Found	Peak Found	Not Found	Peak Found	Peak Found
Starch and sucrose metabolism	Sucrose metabolism	2.4.1.4	1150709971	LOW QUALITY PROTEIN: probable sucrose-phosphate synthase 1 [Asparagus officinalis]	SP synthase	127.91	22	18	116	17	1054	118.5	6.37	300.28	18	0.475	0.337	0.711	0.859117	0.675145	0.52891	9.02	6.32	2.54	169.4	75.8	54.8	12	21.02	16.1	High	High	High	High	High	High	High	High	High	High	High	High	High	High	High	High	High	High	Peak Found
Starch and sucrose metabolism	Sucrose metabolism	2.4.1.4	1150700275	probable sucrose-phosphate synthase 2 [Asparagus officinalis]	SP synthase	87.38	21	17	129	17	1045	117.4	6.89	238.19	17	1.653	1.089	0.67	0.872815	0.961383	0.394135	2.53	1.17	3.77	79.1	130.7	90.3	17.53	11.8	10.21	High	High	High	High	High	High	High	High	High	High	High	High	High	High	High	High	High	High	High
Starch and sucrose metabolism	Sucrose metabolism	2.4.1.4	P49031	probable sucrose-phosphate synthase OS=Beta vulgaris OX=161934 GN=SPS PE=2 SV=1	SP synthase	4.638	3	2	4	1	1045	118.1	6.58	7.97	2	5.695	3.197	0.561	0.297984	0.551115	0.603444	82.18	71.22	132.29	30.3	172.7	96.9	20.25	76.66	56.88	Not Found	Not Found	Not Found	Not Found	Not Found	Not Found	Not Found	Not Found	Not Found	Not Found	High	High	Peak Found	Peak Found	Not Found	High	Not Found	Not Found	Peak Found
Starch and sucrose metabolism	Sucrose metabolism	2.4.1.13	1150719246	sucrose synthase 2 [Asparagus officinalis]	Susy	522.035	59	42	748	21	815	93.2	6.64	2384.58	42	0.703	1.383	2.268	0.959365	0.903873	0.0130841	13.78	28.6	35.01	105.4	74.1	120.5	48.64	59.44	83.39	High	High	High	High	High	High	High	High	High	High	High	High	High	High	High	High	High	High	High
Starch and sucrose metabolism	Sucrose metabolism	2.4.1.13	1150735494	sucrose synthase 2-like [Asparagus officinalis]	Susy	363.632	53	35	515	16	816	93.1	6.32	1510.34	35	0.13	0.381	2.068	0.0164426	0.777493	0.0405597	3.51	35.99	11.77	201.2	32.2	66.6	50.97	38.63	81.45	High	High	High	High	High	High	High	High	High	Peak Found	Peak Found	Peak Found	Peak Found	High	Peak Found	Peak Found	High	High	High
Starch and sucrose metabolism	Sucrose metabolism	2.4.1.13	1150692032	sucrose synthase 2-like [Asparagus officinalis]	Susy	278.853	44	25	431	16	624	71.3	6.84	1119.7	25	0.519	0.309	0.595	0.907409	0.584747	0.177661	2.34	1.37	3.66	164.2	85.1	50.7	17.1	5.33	23.65	High	High	High	High	High	High	High	High	High	High	High	High	High	High	High	High	High	High	High
Starch and sucrose metabolism	Sucrose metabolism	2.4.1.13	1150728673	sucrose synthase 4 [Asparagus officinalis]	Susy	73.706	19	12	159	8	805	91.7	6.48	368.39	12	0.706	2.069	2.734	0.967259	0.703165	0.000271143	19.69	33.73	9.29	89.9	59	151.1	23.16	40.2	39.29	Peak Found	Peak Found	Peak Found	Peak Found	High	High	High	High	High	Peak Found	Peak Found	Peak Found	Peak Found	Peak Found	High	High	High	High	High
Starch and sucrose metabolism	Sucrose metabolism	2.4.1.13	P49034	sucrose synthase OS=Alnus glutinosa OX=3517 GN=SUS1 PE=2 SV=1	Susy	54.254	10	8	62	2	803	91.6	6.81	126.65	8	0.343	0.414	1.383	0.699213	0.871727	0.705147	11.07	32.98	5.72	175.1	52.4	72.5	19.2	26.39	52.12	High	High	High	High	Peak Found	High	High	High	High	Peak Found	Peak Found	Peak Found	Peak Found	Peak Found	Peak Found	High	Peak Found	High	Peak Found
Starch and sucrose metabolism	Sucrose metabolism	2.4.1.13	1150707110	sucrose synthase 2-like [Asparagus officinalis]	Susy	50.799	60	8	97	7	202	22.9	6.8	245.12	8	0.476	0.199	0.47	0.859117	0.209153	0.0155458	18.37	8.22	21.89	184.9	78.3	36.8	19.53	11.33	7.09	High	High	High	High	High	High	High	High	High	High	High	High	High	High	High	High	High	High	High
Starch and sucrose metabolism	Sucrose metabolism	2.4.1.13	1150734501	sucrose synthase 7-like isoform X1 [Asparagus officinalis]	Susy	8.985	4	3	6	2	855	97.5	8.29	3.72	3	0.819	0.867	0.704	0.991757	0.98003	0.916613	21.56	2.11	11.89	109.3	98.8	91.9	37.4	25.75	20.45	Peak Found	High	Peak Found	Peak Found	Not Found	High	Peak Found	Peak Found	Peak Found	Not Found	Not Found	Not Found	Not Found	Not Found	Peak Found	Peak Found	Peak Found	Peak Found	Not Found
Starch and sucrose metabolism	Sucrose metabolism	3.1.3.24	1150735347	sucrose-phosphatase 2-like [Asparagus officinalis]	Suc-phosphatase	16.99	11	3	7	3	424	47.9	5.94	20.51	3	0.7	0.546	0.893	0.967259	0.958886	0.968424	36.06	50.3	1.55	133.5	93.5	72.9	3.9	34.4	35.3	Peak Found	High	Peak Found	Peak Found	Peak Found	High	Peak Found	High	High	Peak Found	Peak Found	Peak Found	Peak Found	Peak Found	Peak Found	Peak Found	High	High	Peak Found
Starch and sucrose metabolism	Starch metabolism	2.4.1.1	1150668547	alpha-1,4 glucan phosphorylase L isozyme, chloroplastic/amyloplastic isoform X1 [Asparagus officinalis]	α-1,4 glucan P	8.077	3	3	9	3	971	109.8	6.34	14.11	3	0.701	1.229	1.226	0.996716	0.957023	0.944496	28.52	13.01	46.08	115.1	83.1	101.9	21.51	14.25	35.85	Peak Found	High	High	High	High	High	High	Peak Found	High	Peak Found	Peak Found	Peak Found	Peak Found	Peak Found	Peak Found	Peak Found	Peak Found	Peak Found	Peak Found
Starch and sucrose metabolism	Starch metabolism	2.4.1.1	P53535	alpha-1,4 glucan phosphorylase L-2 isozyme, chloroplastic/amyloplastic OS=Solanum tuberosum OX=4113 GN=STP-1 PE=1 SV=1	α-1,4 glucan P	4.237	2	2	4	2	974	110.6	5.3	7.71	2	2.497	3.35	1.174	0.592383	0.531288	0.916613	12.57	2.56	24.15	47.9	119.5	132.6	14.35	3.56	17.38	Peak Found	Peak Found	Peak Found	Peak Found	Peak Found	Peak Found	Peak Found	High	High	Peak Found	High	High	Peak Found	Peak Found	Peak Found	Peak Found	Peak Found	Peak Found	Peak Found
Starch and sucrose metabolism	Glucan metabolism	3.2.1.114	1150737412	alpha-mannosidase 2 [Asparagus officinalis]	α-mannosidase	5.929	3	3	8	3	1090	125.4	6.62	4.46	3	1.684	3.025	1.607	0.931663	0.653193	0.446467	14.9	53.35	30.32	50	84.2	165.7	5.82	16.59	48.36	High	High	Peak Found	Peak Found	Peak Found	Peak Found	Peak Found	Peak Found	Peak Found	Peak Found	High	Peak Found	Peak Found	Peak Found	Peak Found	Peak Found	High	Peak Found	Peak Found
Starch and sucrose metabolism	Glucan metabolism	3.2.1.24	1150684862	probable alpha-mannosidase At5g13980 isoform X1 [Asparagus officinalis]	α-mannosidase	173.079	25	20	200	20	1021	113.7	6.32	480.07	20	0.959	1.524	1.527	0.993913	0.875739	0.450813	5.79	2.68	14.96	92	88.2	119.8	14.35	10.58	17.85	High	High	High	High	High	High	High	High	High	High	High	High	High	Peak Found	High	High	High	High	High
Starch and sucrose metabolism	Glucan metabolism	3.2.1.177	1150681399	alpha-xylosidase 1-like [Asparagus officinalis]	α-xylosidase	30.395	10	7	56	7	923	102.9	5.94	106.76	7	2.044	3.217	1.475	0.731647	0.409592	0.494379	28.16	21.71	3.5	51.1	102	146.9	17.28	5.78	9.04	High	High	Peak Found	High	High	Peak Found	Peak Found	Peak Found	Peak Found	High	High	High	High	High	High	High	Peak Found	High	High
Starch and sucrose metabolism	Glucan metabolism	3.2.1.21	1150689162	probable beta-D-xylosidase 7 [Asparagus officinalis]	ß-xylosidase	12.005	5	4	20	4	771	84.4	7.56	43.57	4	0.771	0.396	0.54	0.993913	0.875739	0.165593	18.62	12.36	7.53	146.4	100.2	53.5	7.62	17.22	47.91	High	High	High	High	High	High	High	High	High	Peak Found	Peak Found	Peak Found	Peak Found	Peak Found	Peak Found	Peak Found	Peak Found	High	Peak Found
Starch and sucrose metabolism	Glucan metabolism	3.2.1.52	1150723284	beta-hexosaminidase 1 [Asparagus officinalis]	ß-hexosaminidase	25.184	8	3	13	3	540	60.5	6.04	32.45	3	0.619	0.346	0.67	0.955272	0.831895	0.645935	29.52	11.03	42.03	141.6	94.9	63.6	16.37	12.83	42.62	High	High	High	High	Peak Found	Peak Found	Peak Found	High	Peak Found	Peak Found	High	Peak Found	Peak Found	Peak Found	High	Peak Found	Peak Found	Peak Found	Peak Found
Starch and sucrose metabolism	Glucan metabolism	3.2.1.52	1150705333	beta-hexosaminidase 3 [Asparagus officinalis]	ß-hexosaminidase	8.985	8	3	11	3	540	59.5	6.58	25.52	3	0.386	0.131	0.339	0.852226	0.392083	0.0881443	21.2	30.83	7.86	199.9	78.2	21.9	16.02	17.62	43.44	High	High	High	High	High	High	High	High	High	Peak Found	Peak Found	Peak Found	Peak Found	Peak Found	Peak Found	Peak Found	Peak Found	Peak Found	Not Found
Starch and sucrose metabolism	Glucan metabolism	2.4.99.18	1150691421	dolichyl-diphosphooligosaccharide--protein glycosyltransferase 48 kDa subunit-like isoform X3 [Asparagus officinalis]	DPPoligo:protein GT	82.543	33	13	95	10	435	48.2	6.73	240.76	13	0.869	0.886	1.02	0.993913	0.983932	0.999335	15.28	0.01	3.28	108.7	94.7	96.6	0.91	13.32	8.01	High	High	High	High	High	High	High	High	High	High	High	High	Peak Found	High	High	High	High	High	High
Starch and sucrose metabolism	Glucan metabolism	2.4.99.18	1150724905	dolichyl-diphosphooligosaccharide--protein glycosyltransferase subunit 1A [Asparagus officinalis]	DPPoligo:protein GT	60.167	21	12	81	11	609	68.8	7.59	184.88	12	1.222	1.409	1.248	0.949282	0.893591	0.905375	4.69	4.47	11.28	81.3	101.6	117.1	1.77	13.22	7.72	High	High	High	High	High	High	High	High	High	High	Peak Found	High	High	High	High	High	High	High	High
Starch and sucrose metabolism	Glucan metabolism	2.4.99.18	1150702488	dolichyl-diphosphooligosaccharide--protein glycosyltransferase subunit 2-like [Asparagus officinalis]	DPPoligo:protein GT	36.071	15	7	30	7	691	75.6	6.96	54.53	7	0.366	0.818	2.807	0.791105	0.999557	0.0277929	5.56	34.63	38.61	138.8	47.6	113.6	3.84	24.54	36.64	High	High	High	High	High	High	High	High	High	Peak Found	Peak Found	Peak Found	Peak Found	Peak Found	Peak Found	Peak Found	Peak Found	Peak Found	Peak Found
Starch and sucrose metabolism	Glucan metabolism	2.4.99.18	1150726571	dolichyl-diphosphooligosaccharide--protein glycosyltransferase subunit 1B [Asparagus officinalis]	DPPoligo:protein GT	33.733	17	7	46	6	474	53	7.93	85.14	7	0.865	0.798	0.956	0.994359	0.999557	0.990161	5.42	1.89	7.37	109.7	97.3	93	5.05	27.64	33.18	High	High	High	High	High	High	High	High	High	Peak Found	Peak Found	High	Peak Found	Peak Found	High	High	High	Peak Found	Peak Found
Starch and sucrose metabolism	Glucan metabolism	2.4.99.18	1150746481	dolichyl-diphosphooligosaccharide--protein glycosyltransferase subunit 2-like [Asparagus officinalis]	DPPoligo:protein GT	33.658	10	5	37	5	692	75.5	7.09	75.63	5	0.403	0.384	0.906	0.822816	0.862681	0.963126	4.48	12.71	10.16	165.9	70.4	63.8	6.92	11.77	31.34	High	High	High	High	High	High	High	High	High	Peak Found	High	Peak Found	Peak Found	Peak Found	Peak Found	Peak Found	High	Peak Found	Peak Found
Starch and sucrose metabolism	Glucan metabolism	2.4.99.18	1150724357	dolichyl-diphosphooligosaccharide--protein glycosyltransferase 48 kDa subunit-like [Asparagus officinalis]	DPPoligo:protein GT	30.48	12	4	27	1	444	49	6.05	69.13	4	1.397	1.362	0.86	0.949282	0.948555	0.952824	5.25	3.62	20.58	76	120.4	103.6	18.91	19.71	74.99	High	High	Peak Found	High	High	High	High	High	High	High	Peak Found	Peak Found	Peak Found	High	Peak Found	High	High	High	Not Found
Starch and sucrose metabolism	Glucan metabolism	2.4.99.18	1150708365	dolichyl-diphosphooligosaccharide--protein glycosyltransferase subunit STT3A [Asparagus officinalis]	DPPoligo:protein GT	21.463	10	6	36	6	791	88.2	9.16	48.71	6	2.012	1.826	0.924	0.846092	0.893591	0.972144	10.35	41.76	7.8	63.5	126.6	109.9	18.41	3.87	19.76	Peak Found	High	High	High	High	High	High	High	High	High	High	High	High	High	High	High	High	High	High
Starch and sucrose metabolism	Glucan metabolism	2.4.99.18	Q9FX21	dolichyl-diphosphooligosaccharide--protein glycosyltransferase subunit STT3B OS=Arabidopsis thaliana OX=3702 GN=STT3B PE=2 SV=1	DPPoligo:protein GT	18.838	3	2	40	1	735	82.9	8.92	74.07	2	0.353	0.363	1.031	0.917842	0.9214	0.995088	3.03	75.61	59.59	182.1	62.9	54.9	17.63	19.08	77.8	Peak Found	Peak Found	Peak Found	Peak Found	Peak Found	Peak Found	Peak Found	High	Peak Found	Peak Found	Peak Found	Not Found	Peak Found	Peak Found	Peak Found	Peak Found	Peak Found	Peak Found	Peak Found
Starch and sucrose metabolism	Glucan metabolism	2.4.99.18	1150696471	dolichyl-diphosphooligosaccharide--protein glycosyltransferase subunit DAD1 [Asparagus officinalis]	DPPoligo:protein GT	8.15	12	1	9	1	115	12.5	7.88	23.04	1	0.306	0.493	1.612	0.900326	0.965327	0.756528	24.68	30.41	45.72	180.6	44.5	74.9	12.41	33.45	29.17	High	High	High	High	Peak Found	High	High	High	Peak Found	Peak Found	Not Found	Peak Found	Peak Found	Peak Found	Peak Found	Peak Found	Peak Found	Not Found	Peak Found
Starch and sucrose metabolism	Glucan metabolism	3.2.1.4	1150727560	endo-1,3;1,4-beta-D-glucanase [Asparagus officinalis]	Endo-1,3;1,4-ß-D-glucanase	34.3	31	5	28	5	238	25.6	6.07	66.87	5	0.285	0.204	0.611	0.57307	0.560351	0.706462	12.05	15.89	8.3	204.5	53.9	41.7	10.57	30.15	23.15	High	High	High	High	High	High	High	High	High	Peak Found	High	Peak Found	Peak Found	Peak Found	Peak Found	Peak Found	Peak Found	Peak Found	Not Found
Starch and sucrose metabolism	Glucan metabolism	3.2.1.4	1150705875	endo-1,3;1,4-beta-D-glucanase-like [Asparagus officinalis]	Endo-1,3;1,4-ß-D-glucanase	17.85	15	3	35	3	244	26.3	5.52	91.62	3	1.234	1.082	0.903	0.949282	0.962593	0.935052	10.01	5.97	4.34	85.7	114.1	100.1	7.79	12.73	13.47	High	High	High	High	High	High	High	High	Peak Found	High	High	High	High	High	Peak Found	High	High	High	High
Starch and sucrose metabolism	Glucan metabolism	3.2.1.4	1150733056	endoglucanase 10-like [Asparagus officinalis]	Endo-1,3;1,4-ß-D-glucanase	10.543	4	2	18	2	618	69	9.03	42.37	2	0.695	1.267	1.823	0.993913	0.942726	0.503836	10.83	32.48	22.48	114.1	73	112.9	36.3	38.11	56.52	High	High	High	High	High	High	Peak Found	High	High	Peak Found	Peak Found	Peak Found	Peak Found	High	Peak Found	High	High	Peak Found	Peak Found
Starch and sucrose metabolism	Glucan metabolism	3.2.1.39	1150742861	beta-glucosidase 24-like [Asparagus officinalis]	Glucan endo-1,3-ß-glucosidase	732.27	74	35	1487	19	552	63	6.64	5129.65	35	0.986	0.944	0.906	0.991757	0.983298	0.932464	8.17	22.52	0.32	112.8	90.6	96.5	17.24	22.8	17.12	High	High	High	High	High	High	High	High	High	High	High	High	High	High	High	High	High	High	High
Starch and sucrose metabolism	Glucan metabolism	3.2.1.39	1150745456	beta-glucosidase 24-like isoform X3 [Asparagus officinalis]	Glucan endo-1,3-ß-glucosidase	374.946	42	22	893	6	552	62.8	6.55	2976.78	22	1.962	2.124	1.085	0.726916	0.667971	0.982309	0.31	61.24	60.88	54.9	120.6	124.5	37.51	34.14	26.58	High	High	High	High	High	High	High	High	High	High	High	High	High	High	High	High	High	High	High
Starch and sucrose metabolism	Glucan metabolism	3.2.1.39	1150694767	glucan endo-1,3-beta-glucosidase 7-like [Asparagus officinalis]	Glucan endo-1,3-ß-glucosidase	68.183	31	8	65	6	366	39.5	4.7	177.83	8	1.443	1.438	1.119	0.948496	0.929358	0.946676	11.96	8.93	3.03	80.6	103.5	115.9	30.96	38.67	46.24	High	High	High	High	High	High	High	High	High	High	High	High	High	High	High	High	High	Peak Found	High
Starch and sucrose metabolism	Glucan metabolism	3.2.1.39	1150741262	probable glucan 1,3-alpha-glucosidase, partial [Asparagus officinalis]	Glucan endo-1,3-ß-glucosidase	42.663	13	9	52	9	831	93.9	5.97	107.69	9	0.987	0.978	1.017	0.967259	0.973844	0.995895	3.9	4.55	8.1	101.6	101.2	97.3	8.15	10.81	21.18	High	High	High	High	High	High	High	High	High	Peak Found	High	High	High	High	High	High	High	High	High
Starch and sucrose metabolism	Glucan metabolism	3.2.1.39	1150692426	glucan endo-1,3-beta-glucosidase 3-like [Asparagus officinalis]	Glucan endo-1,3-ß-glucosidase	31.186	11	3	33	3	497	53.2	5.21	145.91	3	0.682	0.602	0.881	0.959365	0.966238	0.954783	12.22	32.96	7.69	122.2	94.5	83.3	7.57	13.62	26.22	High	High	High	High	High	High	High	High	High	High	Peak Found	High	High	High	Peak Found	High	High	Peak Found	Peak Found
Starch and sucrose metabolism	Glucan metabolism	3.2.1.39	1150708457	glucan endo-1,3-beta-glucosidase 13-like isoform X1 [Asparagus officinalis]	Glucan endo-1,3-ß-glucosidase	26.947	11	5	32	5	497	54.1	5.44	51.51	5	0.727	0.714	1.024	0.975174	0.983932	0.995088	6	34.04	11.85	128.4	79.9	91.7	11.78	12.08	18.64	High	High	High	High	High	High	High	High	High	High	High	High	High	High	High	High	High	High	High
Starch and sucrose metabolism	Glucan metabolism	3.2.1.39	1150723586	LOW QUALITY PROTEIN: glucan endo-1,3-beta-glucosidase 7-like [Asparagus officinalis]	Glucan endo-1,3-ß-glucosidase	15.214	9	3	11	1	415	44.9	6.8	12.6	3	0.439	0.834	1.763	0.949282	0.992701	0.664845	10.63	25.31	44.33	136.7	63.1	100.3	25.98	20.32	31.99	Peak Found	High	Peak Found	Peak Found	Peak Found	Peak Found	Peak Found	Peak Found	High	Peak Found	Peak Found	Peak Found	Peak Found	Peak Found	Peak Found	Peak Found	Peak Found	Peak Found	Peak Found
Starch and sucrose metabolism	Glucan metabolism	3.2.1.39	1150701595	probable glucan endo-1,3-beta-glucosidase A6 [Asparagus officinalis]	Glucan endo-1,3-ß-glucosidase	13.704	13	2	7	2	388	43.4	6.99	14.97	2	0.274	0.416	0.819	0.887105	0.949627		50.1	7.99	10.45	177.5	64.9	57.6	56.38	18.43	20.51	High	High	High	High	High	Peak Found	High	Peak Found	High	Not Found	Not Found	Not Found	Not Found	Not Found	Not Found	Not Found	Not Found	Not Found	Not Found
Starch and sucrose metabolism	Glucan metabolism	3.2.1.39	1150672846	glucan endo-1,3-beta-glucosidase 6-like [Asparagus officinalis]	Glucan endo-1,3-ß-glucosidase	7.361	7	3	7	3	476	51.9	5.78	8.13	3	1.807	1.769	0.928	0.785974	0.794318	0.953876	11.09	12.79	7.75	66.9	120.9	112.2	9.9	6.87	17.88	Peak Found	Peak Found	Peak Found	Peak Found	High	Peak Found	Peak Found	High	Peak Found	Peak Found	Peak Found	High	Peak Found	Peak Found	Peak Found	High	Peak Found	Peak Found	Peak Found
Starch and sucrose metabolism	Glucan metabolism	3.2.1.39	1150675604	beta-glucosidase 12-like [Asparagus officinalis]	Glucan endo-1,3-ß-glucosidase	6.987	7	3	15	3	407	46.5	9.01	25.19	3	3.338	0.968	0.312	0.353498	0.98003	5.30114e-06	71.19	15.91	10.92	55.1	183.9	61	31.32	27.55	11.25	Peak Found	Peak Found	Peak Found	Peak Found	Peak Found	Peak Found	Peak Found	High	High	High	High	High	High	High	High	High	High	High	High
Starch and sucrose metabolism	Glucan metabolism	3.2.1.39	1150704168	beta-glucosidase 4-like [Asparagus officinalis]	Glucan endo-1,3-ß-glucosidase	6.198	14	2	22	1	166	18.7	4.74	25.99	2	1.35	1.38	0.902	0.949282	0.901572	0.98762	9.91	43.05	26.2	67	134.8	98.2	24.94	25.31	15.29	Peak Found	Peak Found	Peak Found	Peak Found	High	High	Peak Found	Peak Found	Peak Found	Peak Found	Peak Found	Peak Found	Peak Found	Peak Found	Peak Found	Peak Found	Peak Found	Peak Found	Peak Found
Starch and sucrose metabolism	Glucan metabolism	3.2.1.39	1150715524	glucan endo-1,3-beta-glucosidase 6-like isoform X2 [Asparagus officinalis]	Glucan endo-1,3-ß-glucosidase	5.414	4	2	5	2	473	52	5.26	9.39	2	1.031	0.894	0.884	0.985635	0.983932	0.955876	4.04	17.01	1.32	101.6	109.4	89	3.3	7.59	16.5	Peak Found	High	High	High	Peak Found	High	Peak Found	Peak Found	Peak Found	Peak Found	Peak Found	Peak Found	Peak Found	Peak Found	Peak Found	Peak Found	Peak Found	Peak Found	Peak Found
Starch and sucrose metabolism	Glucan metabolism	3.2.1.39	Q9FLU9	beta-glucosidase 31 OS=Arabidopsis thaliana OX=3702 GN=BGLU31 PE=2 SV=1	Glucan endo-1,3-ß-glucosidase	3.736	2	2	30	1	534	61.8	6.27	28.26	2	0.946	1.162	1.55	0.994359	0.965327	0.36626	10.58	2.57	0.35	83.3	84.8	131.9	39.18	22.42	32.44	High	Peak Found	Peak Found	High	Peak Found	Peak Found	Peak Found	Peak Found	High	Peak Found	Peak Found	High	Peak Found	Peak Found	Peak Found	Peak Found	Peak Found	Peak Found	Peak Found
Starch and sucrose metabolism	Glucan metabolism	3.2.1.207	1150727038	glucosidase 2 subunit beta [Asparagus officinalis]	Glucosidase	49.54	17	8	77	8	655	74.4	4.87	155.6	8	1.02	0.992	1.048	0.978863	0.967767	0.995088	2.68	16.12	24.25	99.3	102.2	98.5	0.48	5.06	20.03	High	High	High	High	High	High	High	High	High	High	High	High	High	High	High	High	High	High	Peak Found
Starch and sucrose metabolism	Glucan metabolism	3.2.1.152	1150706836	mannosylglycoprotein endo-beta-mannosidase isoform X1 [Asparagus officinalis]	Protein endo-ß-M	15.481	4	3	21	3	1045	118.1	6.73	42.7	3	2.15	2.76	1.272	0.804137	0.761217	0.916613	33.32	31.66	1.37	47.8	117	135.2	59.44	16.22	6.46	High	High	High	High	High	Peak Found	High	Peak Found	Peak Found	Peak Found	High	High	Peak Found	High	High	High	High	High	Not Found
Starch and sucrose metabolism	Glucan metabolism	3.2.1.78	1150726054	mannan endo-1,4-beta-mannosidase 6-like [Asparagus officinalis]	Mannan endo-1,4-ß-M	11.51	6	2	2	2	448	51.1	5.74	2.33	2	0.266	0.314	1.036	0.892541	0.9214		54.09	51.48	40.98	180.3	58.8	60.9	33.49	24.14	22.08	Peak Found	Peak Found	Peak Found	Peak Found	Peak Found	Peak Found	Peak Found	Peak Found	High	Not Found	Not Found	Not Found	Not Found	Not Found	Not Found	Not Found	Not Found	Not Found	Not Found
Starch and sucrose metabolism	Glucan metabolism	2.4.1.207	1150743101	xyloglucan endotransglucosylase/hydrolase protein A-like [Asparagus officinalis]	Xyloglucan endo-TG/H	6.451	7	2	11	2	292	33.6	8.38	20.53	2	0.867	0.777	0.914	0.996716	0.997147	0.972144	12.95	9.68	3.07	114.3	97	88.7	11.05	14.38	43.92	High	Peak Found	Peak Found	High	High	High	High	High	High	High	Peak Found	Peak Found	Peak Found	Peak Found	High	Peak Found	High	High	Peak Found
Starch and sucrose metabolism	Cellulose metabolism	2.4.1.12	1150735339	LOW QUALITY PROTEIN: probable cellulose synthase A catalytic subunit 8 [UDP-forming] [Asparagus officinalis]	Cellulose S	38.203	11	8	51	5	1053	117.7	7.39	78.7	8	1.811	2.691	1.486	0.902178	0.74191	0.461951	6.12	12.46	19.02	54.5	98.8	146.7	38.28	44	31.75	Peak Found	Peak Found	Peak Found	High	Peak Found	Peak Found	High	High	High	Peak Found	Peak Found	High	High	Peak Found	High	High	High	High	High
Starch and sucrose metabolism	Cellulose metabolism	2.4.1.12	1150719284	probable cellulose synthase A catalytic subunit 1 [UDP-forming] [Asparagus officinalis]	Cellulose S	21.262	6	4	23	1	899	101.6	7.05	22.34	4	0.263	0.285	1.129	0.880738	0.913884	0.959629	91.47	20.74	23.26	188.6	49.6	61.8	45.06	36.79	15.1	Not Found	Peak Found	Peak Found	High	Peak Found	Peak Found	High	High	High	Not Found	Not Found	Not Found	Not Found	Not Found	Not Found	Not Found	Not Found	Not Found	Not Found
Starch and sucrose metabolism	Cellulose metabolism		1150689119	LOW QUALITY PROTEIN: protein CELLULOSE SYNTHASE INTERACTIVE 1-like [Asparagus officinalis]	Cellulose S interactive	14.53	2	4	11	4	2145	228.9	5.54	7.99	4	0.581	0.733	1.261	0.975174	0.999557	0.929905	2.87	26.91	0.12	129.6	75.3	95.1	13.37	25.27	41.98	Peak Found	Peak Found	Peak Found	Peak Found	High	High	High	High	High	Peak Found	Peak Found	Peak Found	Peak Found	Peak Found	Peak Found	High	Peak Found	High	Peak Found
[truncated: 8 more columns]
